# Supplementary material
Source: PubMed Central journal article supplement (PMC6452489)

## Supporting Information

### Photoredox Radical/Polar Crossover Enables Construction of Saturated Nitrogen Heterocycles

Loïc R. E. Pantaine,<sup>†</sup> John A. Milligan,<sup>†</sup> Jennifer K. Matsui,<sup>†</sup> Christopher B. Kelly,<sup>\*, ‡, §</sup> and Gary A. Molander<sup>\*, †</sup>

<sup>†</sup>*Roy and Diana Vagelos Laboratories, Department of Chemistry, University of Pennsylvania, 231 South 34th Street, Philadelphia, Pennsylvania 19104-6323*

<sup>‡</sup>*Department of Chemistry, Virginia Commonwealth University, 1001 West Main Street, P. O. Box 842006 Richmond, VA 23284-9069, United States*

<sup>§</sup>*Medicines for All Institute, Virginia Commonwealth University, Biotech 8 737 N. 5th Street, Richmond, VA 23219-1441*

\*To whom correspondence should be addressed. E-mail: [gmolandr@sas.upenn.edu](mailto:gmolandr@sas.upenn.edu), [cbkelly@vcu.edu](mailto:cbkelly@vcu.edu)

|                                                                                                                                  |            |
|----------------------------------------------------------------------------------------------------------------------------------|------------|
| <b>General Considerations</b>                                                                                                    | <b>S2</b>  |
| Comments regarding origins of starting materials, purification of solvents, and spectroscopic techniques.                        |            |
| <b>Synthesis of Substrates for RPC Annulation</b>                                                                                | <b>S3</b>  |
| Procedures for the synthesis of imines and silicates                                                                             |            |
| <b>Optimization of RPC Annulation</b>                                                                                            | <b>S7</b>  |
| Procedures for control and optimization experiments for RPC Annulation                                                           |            |
| <b>General Procedure for RPC Annulation</b>                                                                                      | <b>S11</b> |
| General procedure for RPC annulation and isolation procedures<br>Spectral characterization information for nitrogen heterocycles |            |
| <b>NMR Spectra of Synthesized Compounds</b>                                                                                      | <b>S25</b> |
| <sup>1</sup> H, <sup>13</sup> C, and, if applicable, <sup>19</sup> F NMR spectra of starting materials and products              |            |

## General Considerations:

**General:** All chemical transformations requiring inert atmospheric conditions or vacuum distillation used Schlenk line techniques with a 4- or 5-port dual-bank manifold. Argon or nitrogen was used to provide such an atmosphere. LED irradiation was accomplished using the LED reactor described in our previous report.<sup>1</sup> NMR spectra (<sup>1</sup>H, <sup>13</sup>C, <sup>19</sup>F) were obtained at 298 K. <sup>1</sup>H NMR spectra were referenced to residual, non-deuterated chloroform ( $\delta$  7.26) in CDCl<sub>3</sub> or DMSO in DMSO-d<sub>6</sub> ( $\delta$  2.50). <sup>13</sup>C NMR spectra were referenced to CDCl<sub>3</sub> ( $\delta$  77.3). <sup>19</sup>F NMR spectra were referenced using hexafluorobenzene ( $\delta$  -161.64) as an internal standard and run with C-F/C-H decoupling. Reactions were monitored by <sup>1</sup>H NMR and/or TLC on silica gel plates (60 Å porosity, 250  $\mu$ m thickness). TLC analysis was performed using hexanes/EtOAc as the eluant and visualized using permanganate stain and/or UV light. Silica plugs utilized flash silica gel (60 Å porosity, 32-63  $\mu$ m). Flash chromatography was carried out using standard column chromatography on silica gel or by using an automated system (monitoring at 254 nm and 280 nm) with silica cartridges (60 Å porosity, 20-40  $\mu$ m). Solvents were purified with drying cartridges through a solvent delivery system.

**Chemicals:** Na<sub>2</sub>SO<sub>4</sub>, MgSO<sub>4</sub>, CH<sub>2</sub>Cl<sub>2</sub>, benzene, EtOAc, pentane, hexanes, Et<sub>2</sub>O, DMSO and toluene were used as purchased. The organic photocatalyst 2,4,5,6-tetra(9*H*-carbazol-9-yl)isophthalonitrile (4CzIPN) was prepared in-house by the procedure outlined in our previous publication.<sup>2</sup> Alkylsilicates were prepared by the procedures outlined here. Imines were prepared either through the procedures outlined here, previously reported procedures by our group,<sup>2</sup> or by known procedures (sulfonyl-protected,<sup>2</sup> aryl,<sup>3</sup> Boc,<sup>4</sup> 3*H*-indole,<sup>5</sup> hydrazone,<sup>6</sup> iminoacetate,<sup>7</sup> and imidate<sup>8</sup>).

<sup>1</sup> For information on this reactor and its construction see the *Photochemical Reactor Design* of the Supporting Information of: Milligan, J. A.; Phelan, J. P.; Polites, V. C.; Kelly, C. B.; Molander, G. A. *Org. Lett.* **2018**, *20*, 6840.

<sup>2</sup> Patel, N. P.; Kelly, C. B.; Siegenfeld, A. P.; Molander, G. A. *ACS Catal.* **2017**, *7*, 1766.

<sup>3</sup> Qu B., Samankumara L. P., Ma S., Fandrick K. R., Desrosiers J.-N., Rodriguez S., Li Z., Haddad N., Han Z. S., McKellop K., Pennino S., Grinberg N., Gonnella N. C., Song J. J., Senanayake C. H., *Angew. Chem. Int. Ed.* **2014**, *53*, 14428; Aslam N. A., Babu S. A., Rani S., Mahajan S., Solanki J., Yasuda M., Baba A., *Eur. J. Org. Chem.* **2015**, 4168; Liu Y., Yang Q., Hao D., Zhang W., *Aust. J. Chem.* **2012**, *65*, 1390; Li Q., Li Y., Wang J., Lin Y., Wei Z., Duan H., Yang Q., Baib F., Lia Y., *New J. Chem.*, **2018**, *42*, 827; Chu J. C. K., Dalton D. M., Rovis T., *J. Am. Chem. Soc.*, **2015**, *137*, 4445; Bäumlér C., Kempe R., *Chem. Eur. J.* **2018**, *24*, 8989; Cao C., Lua B., Chen G., *J. Phys. Org. Chem.* **2011**, *24*, 335; Dibble D. J., Kurakake R., Wardrip A. G., Bartlett A., Lopez R., Linares J. A., Firstman M., Schmidt A. M., Umerani M. J., Gorodetsky A. A., *Org. Lett.*, **2018**, *20*, 502; Schwob T., Kempe R., *Angew. Chem. Int. Ed.* **2016**, *55*, 15175; Lawson J. R., Wilkins L. C., Melen R. L., *Chem. Eur. J.* **2017**, *23*, 10997; Peixoto D., Locati A., Marques C. S., Goth A., Ramalhoab P. J. P., Burke A. J., *RSC Adv.*, **2015**, *5*, 99990; Wang H., Wang C., Huang K., Liu L., Chang W., Li J., *Org. Lett.* **2016**, *18*, 2367; Tan D.-W., Li H.-X., Young D. J., Lang J.-P., *Tetrahedron*, **2016**, *72*, 4169; Cao C.-T., Zhou W., Cao C., *J Phys Org Chem.* **2017**, *30*, 3672; Eakins G. L., Cooper M. W., Gerasimchuk N. N., Phillips T. J., Breyfogle B. E., Stearman C. J., *Can. J. Chem.* **2013**, *91*, 1059; Cuesta, L., Maluenda, I., Soler, T., Navarro, R. Urriolabertia, E. P. *Inorg. Chem.* **2011**, *50*, 37-45.

<sup>4</sup> Pedrosa R., Andrés J. M., Ávila D. P., Ceballos M., Pindado R., *Green Chem.* **2015**, *17*, 2217.

<sup>5</sup> Lin R., Ding S., Shi Z., Jiao N., *Org. Lett.*, **2011**, *13*, 4498.

<sup>6</sup> Xu X., Zavaliy P. Y., Doyle M. P., *Angew. Chem. Int. Ed.* **2012**, *51*, 9829.

<sup>7</sup> Enders D., Rembiak A., Stöckel B. A., *Adv. Synth. Catal.* **2013**, *355*, 1937.

<sup>8</sup> Sadig J. E. R., Foster R., Wakenhut F., Willis M. C., *J. Org. Chem.* **2012**, *77*, 9473.

## Synthesis of Substrates for RPC Annulation

### Synthesis of Imines

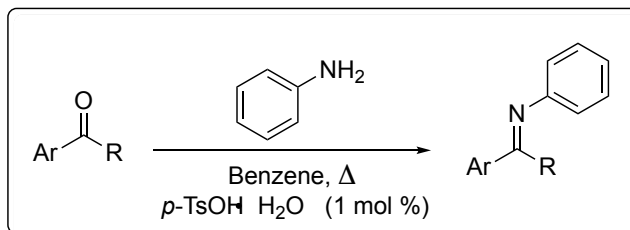

### Representative Procedure

To an appropriately sized round bottom flask equipped with a stir bar was added either an aldehyde or ketone (1 equiv) followed by benzene. The flask was then charged with the appropriate aniline derivative (1 equiv) and was stirred at rt for 5 min. After this time, *p*-TsOH • H<sub>2</sub>O was then added to the mixture in varying proportions (1 mol. % for electron-poor aldehydes and/or electron-rich amines, 5 mol. % for electron-rich aldehydes and/or electron-poor amines and 50 mol. % for ketones) was added in one portion, and the flask was equipped with a Dean-Stark trap with a reflux condenser. The reaction mixture was heated to reflux overnight or until ~1 equiv of H<sub>2</sub>O was collected in the trap. The reaction was cooled to rt and the solvent was removed *in vacuo* by rotary evaporation. The resulting crude material was purified differently depending on whether an aldimine or ketimine was produced. For aldimines, the crude material was re-dissolved in a minimum amount of hexane and filtered to remove the *p*-TsOH, giving the pure imine. For ketimines, the mixture was flushed through a small silica plug with hexane/EtOAc (9:1), and the resulting filtrate was concentrated and recrystallized from hexane/CH<sub>2</sub>Cl<sub>2</sub>. Below is data for imines not previously reported by us and/or unknown in the literature.

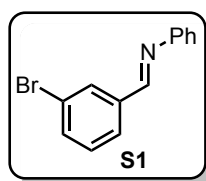

***N*-(3-Bromobenzylidene)aniline S1<sup>9</sup>** (2.50 g, 96%) was prepared according to the representative procedure for imine synthesis from 3-bromobenzaldehyde (1.86 g, 10.1 mmol, 1.01 equiv), aniline (0.930 g, 9.99 mmol, 1.00 equiv) and *p*-TsOH (20 mg, 0.11 mmol, 1 mol %) in benzene (50 mL). Imine **S1** was obtained as an orange-tinted oil.

**<sup>1</sup>H NMR** (CDCl<sub>3</sub>, 500 MHz) δ 8.41 (s, 1 H), 8.12 (s, 1 H), 7.81 (d, 1 H, *J* = 7.5 Hz), 7.62 (d, 1 H, *J* = 8.0 Hz), 7.46-7.40 (m, 2 H), 7.36 (t, 1 H), 7.30-7.26 (m, 1 H), 7.25-7.22 (m, 2 H)

**<sup>13</sup>C NMR** (CDCl<sub>3</sub>, 125 MHz) δ 158.4, 151.4, 138.1, 134.1, 131.2, 130.2, 129.1, 127.5, 126.3, 123.0, 120.8

**FT-IR** (ATR) 3075, 1625, 1186, 782, 760, 692, 679 cm<sup>-1</sup>

<sup>9</sup>Tong, S.; Piemontesi, S.; Wang, Q.; Wang, M.; Zhu, J. *Angew Chem., Int. Ed.* **2017**, *56*, 7958-7962.

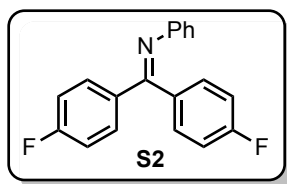

**N-(Bis(4-fluorophenyl)methylene)aniline S2** (0.925 g, 63%) was prepared by treating bis(4-fluorophenyl)methanone (1.09 g, 5.00 mmol, 1 equiv), Et<sub>3</sub>N (3.5 mL, 25 mmol, 5.0 equiv), and aniline (0.699 g, 7.50 mmol, 1.50 equiv) with TiCl<sub>4</sub> (1.1 mL, 9.9 mmol, 2.0 equiv) in CH<sub>2</sub>Cl<sub>2</sub> (50 mL) at 0 °C. The reaction was warmed to rt and stirred for 16 h. The reaction mixture was carefully quenched with H<sub>2</sub>O (10 mL) and extracted with CH<sub>2</sub>Cl<sub>2</sub> (50 mL). The organic layers were washed with brine (50 mL), then were dried (Na<sub>2</sub>SO<sub>4</sub>) and concentrated. Purification by chromatography on SiO<sub>2</sub> afforded **S2** as a colorless solid (mp = 109-111 °C).

**<sup>1</sup>H NMR** (CDCl<sub>3</sub>, 500 MHz) δ 7.79-7.72 (m, 2 H), 7.21-7.15 (m, 2 H), 7.14-7.08 (m, 4 H), 7.00-6.93 (m, 3 H), 6.74-6.68 (m, 2 H)

**<sup>13</sup>C NMR** (CDCl<sub>3</sub>, 125 MHz) δ 165.8, 164.4 (<sup>1</sup>J<sub>CF</sub> = 245 Hz), 162.5 (<sup>1</sup>J<sub>CF</sub> = 242 Hz), 150.8, 135.7 (<sup>4</sup>J<sub>CF</sub> = 4 Hz), (<sup>4</sup>J<sub>CF</sub> = 4 Hz), 131.8 (<sup>4</sup>J<sub>CF</sub> = 4 Hz), 131.4 (<sup>3</sup>J<sub>CF</sub> = 9 Hz), 131.3 (<sup>3</sup>J<sub>CF</sub> = 9 Hz), 128.5, 123.3, 120.7, 115.2 (<sup>2</sup>J<sub>CF</sub> = 21 Hz), 115.1 (<sup>2</sup>J<sub>CF</sub> = 21 Hz).

**<sup>19</sup>F NMR** (CDCl<sub>3</sub>, 476 MHz) δ -109.5 (s, 1 F), -111.3 (s, 1 F)

**FT-IR** (ATR) 1589, 1502, 1218, 843, 769 cm<sup>-1</sup>

**HRMS** (EI<sup>+</sup>) calcd for C<sub>19</sub>H<sub>14</sub>NF<sub>2</sub> [M+H]<sup>+</sup> 294.1094, found 294.1086

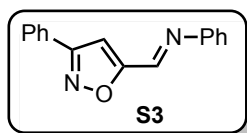

**N-((3-Phenylisoxazol-5-yl)methylene)aniline S3** (1.02 g, 95%) was prepared according to the representative procedure for imine synthesis from 3-phenylisoxazole-5-carbaldehyde (0.748 g, 4.32 mmol, 1.00 equiv) and aniline (0.422 g, 4.54 mmol, 1.00 equiv) using *p*-TsOH • H<sub>2</sub>O (8 mg, 0.043 mmol, 1 mol %) in benzene (25 mL). The desired imine **S3** was obtained as a colorless solid (mp = 124–125 °C).

**<sup>1</sup>H NMR** (CDCl<sub>3</sub>, 500 MHz) δ 8.55 (s, 1 H), 7.92 (m, 2 H), 7.54-7.42 (m, 5 H), 7.38-7.30 (m, 3 H), 7.21 (s, 1 H)

**<sup>13</sup>C NMR** (CDCl<sub>3</sub>, 125 MHz) δ 168.0, 163.1, 150.3, 146.3, 130.5, 129.5, 129.2, 128.6, 127.9, 127.0, 121.3, 103.2

**FT-IR** (ATR) 3026, 1566, 1438, 1174, 768, 753, 687, 681 cm<sup>-1</sup>

**HRMS** (EI<sup>+</sup>) calcd for C<sub>16</sub>H<sub>13</sub>N<sub>2</sub>O [M+H]<sup>+</sup> 249.1028, found 249.1025



## Synthesis of Haloalkylsilicates<sup>10</sup>

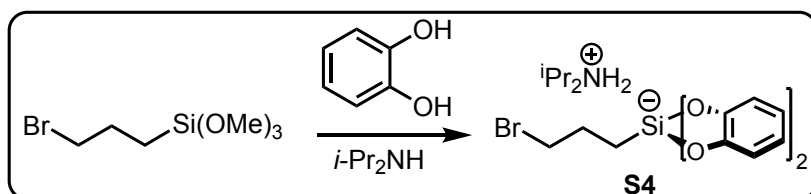

### Representative Procedure: Diisopropylammonium Bis(catecholato)(3-bromopropyl)silicate (**S4**)

To a flame-dried 50 mL round bottom flask equipped with a stir bar was added anhydrous *i*-Pr<sub>2</sub>NH (8.66 g, 12 mL, 85.6 mmol, 4.28 equiv) under argon. The flask was heated to 40 °C and, once at temperature, catechol<sup>11</sup> (4.30 g, 39 mmol, 1.95 equiv) was added followed by (3-bromopropyl)trimethoxysilane (4.85 g, 20 mmol, 1 equiv). The solution quickly became heterogeneous and produced a white precipitate. The solution was vigorously stirred at this temp for 60 min. After this time, a 1:1 mixture by volume of pentane/Et<sub>2</sub>O (20 mL) was added. The resulting solution was filtered, and the solid was washed with a 1:1 mixture by volume of pentane/Et<sub>2</sub>O (~50 mL) followed by pentane (3 × 50 mL). The solid was then dried under high vacuum at 50 °C to give the desired bromosilicate **S4** (9.35 g, 97%) as a powdery white solid (mp = 145-147 °C)

<sup>1</sup>H NMR (DMSO-d<sub>6</sub>, 500 MHz) δ 8.11 (br s, 2 H), 6.56-6.50 (m, 4 H), 6.47-6.41 (m, 4 H), 3.39-3.29 (m, 4 H), 1.75-1.64 (m, 2 H), 1.20 (d, 12 H, *J* = 6.5 Hz), 0.61-0.54 (m, 2 H)

<sup>13</sup>C NMR (DMSO-d<sub>6</sub>, 125 MHz) δ 150.4, 117.2, 109.6, 46.4, 38.6, 28.8, 18.8, 17.1

FT-IR (ATR): 3075, 1485, 1466, 1237, 812, 744 cm<sup>-1</sup>

HRMS (EI<sup>+</sup>) calcd for C<sub>15</sub>H<sub>14</sub>O<sub>4</sub>BrSi<sup>-</sup> [M] 364.9845, found 364.9867

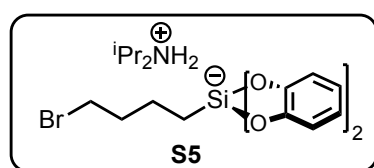

### Diisopropylammonium Bis(catecholato)(4-bromobutyl)silicate **S5**

(8.09 g, 82%) was prepared according to the representative procedure for silicate synthesis from (4-bromobutyl)trimethoxysilane (5.12 g, 19.9 mmol, 1.00 equiv), catechol (4.28 g, 38.9 mmol, 1.95 equiv), and *i*-Pr<sub>2</sub>NH (8.6 g, 4.3 equiv). The desired imine **S5** was obtained as a colorless solid (mp = 161-162 °C)

<sup>1</sup>H NMR (DMSO-d<sub>6</sub>, 500 MHz) δ 7.96 (br s, 2 H), 6.53-6.48 (m, 4 H), 6.44-6.39 (m, 4 H), 3.41-3.34 (m, 4 H), 1.70-1.60 (m, 2 H), 1.35-1.25 (m, 2 H), 1.18 (d, 12 H, *J* = 6.5 Hz), 0.51-0.48 (m, 2 H)

<sup>10</sup> This protocol is general for all haloalkyltrimethoxysilanes except for 2-bromoethyltrimethoxysilane, which undergoes degradation as soon as the silane is added. Due to the strong effervescence observed, the compound likely undergoes β-elimination, releasing ethylene gas.

<sup>11</sup> Recrystallized from hexane or heptane prior to use

$^{13}\text{C NMR}$  (DMSO- $d_6$ , 125 MHz)  $\delta$  150.5, 117.1, 109.5, 46.4, 35.8, 35.2, 23.0, 18.9, 17.2

**FT-IR** (ATR): 3045, 1484, 1449, 1237, 812, 736  $\text{cm}^{-1}$

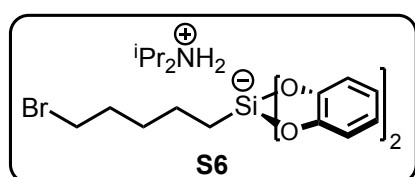

**Diisopropylammonium Bis(catecholato)(4-bromopentyl)silicate S6** (4.39 g, 86%) was prepared according to the representative procedure for silicate synthesis from (5-bromopentyl)trimethoxysilane (2.71 g, 9.99 mmol, 1.00 equiv), catechol (2.14 g, 19.4 mmol, 1.95 equiv), and *i*-Pr $_2$ NH (4.0 g, 40 mmol, 4.0 equiv) The desired imine **S6** was obtained as a colorless solid (mp = 169-171 $^\circ\text{C}$ )

$^1\text{H NMR}$  (DMSO- $d_6$ , 500 MHz)  $\delta$  7.67 (br s, 2 H), 6.54-6.48 (m, 4 H), 6.45-6.39 (m, 4 H), 3.35 (t, 2 H,  $J = 7.0$  Hz), 3.29-3.25 (m, 2 H), 1.68-1.60 (m, 2 H), 1.16-1.18 (m, 4 H), 1.17 (d, 12 H,  $J = 6.5$  Hz), 0.51-0.44 (m, 2 H)

$^{13}\text{C NMR}$  (DMSO- $d_6$ , 125 MHz)  $\delta$  150.5, 117.1, 109.5, 46.4, 35.2, 32.3, 31.2, 23.5, 19.2, 18.1

**FT-IR** (ATR): 3046, 1484, 1467, 1238, 811, 741  $\text{cm}^{-1}$

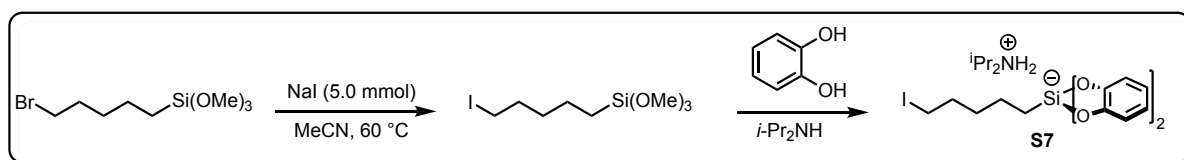

To an oven-dried 100 mL round bottom flask equipped with stir bar was charged with flame-dried sodium iodide (15.0 g, 100 mmol, 5.00 equiv). The flask was backfilled with  $\text{N}_2$ , cooled, and sealed with a rubber septum. The flask was backfilled with Ar and anhydrous MeCN (15 mL) and 5-bromopentyltrimethoxysilane (5.42 g, 20 mmol, 1.0 equiv). After stirring for 5 min, the flask was heated to 60 $^\circ\text{C}$  in an oil bath. The reaction mixture was stirred at this temperature for 48 h. After this time, the reaction mixture was cooled to rt, and diluted with a 1:1 mixture of Et $_2$ O/pentane (~80 mL). The heterogeneous solution washed with water (3 x 40 mL), and brine (40 mL). The solvent was removed in vacuo by careful rotary evaporation in a rt water bath (~23 $^\circ\text{C}$ ). Purification by vacuum distillation (bp 83 $^\circ\text{C}$  @ 1 mmHg) afforded (5-iodopentyl)trimethoxysilane (5.20 g, 16.3 mmol, 82%) as a yellow-tinted oil.

**Diisopropylammonium Bis(catecholato)(4-bromopentyl)silicate S7** (7.67 g, 86%) was prepared according to the representative procedure for silicate synthesis from (5-iodopentyl)trimethoxysilane (5.20 g, 16.3 mmol, 1.00 equiv), catechol (3.51 g, 31.9 mmol, 1.95 equiv), and *i*-Pr $_2$ NH (7.1 g, 70 mmol, 4.3 equiv) The desired imine **S7** was obtained as a colorless solid (mp = 168-170 $^\circ\text{C}$ )

$^1\text{H NMR}$  (DMSO- $d_6$ , 500 MHz)  $\delta$  8.03 (br s, 2 H), 6.54-6.48 (m, 4 H), 6.45-6.40 (m, 4 H), 3.41-3.29 (m, 2 H), 3.11 (t, 2 H,  $J = 7.0$  Hz), 1.66-1.55 (m, 2 H), 1.25-1.14 (m, 4 H), 1.17 (d, 12 H,  $J = 6.5$  Hz), 0.51-0.44 (m, 2 H)

$^{13}\text{C NMR}$  (DMSO- $d_6$ , 125 MHz)  $\delta$  150.5, 117.0, 109.5, 46.4, 35.5, 33.0, 23.3, 18.8, 18.1, 9.1



## General High-throughput Experimentation (HTE) Information

High Throughput Experimentation (HTE) was performed at the Penn/Merck Center for High Throughput Experimentation at the University of Pennsylvania. Screens were conducted on a 0.01 mmol scale and analyzed by UPLC with addition of 4,4'-di-*tert*-butylbiphenyl as internal standard (IS). The ratios corresponding to the areas of the product to internal standard (P/IS) are outlined below. Each screen was carried out independently, and the ratios from one screen should not be quantitatively compared to those from a different screen.

## General Procedure for HTE Screens

The reactions were carried out in a 24 or 96-well plate reactor block containing 1 mL glass vials equipped with a Teflon-coated magnetic stir bar. The plate was placed in a glovebox, and stock solutions of the appropriate reagents (silicate, imine, potential additives and photocatalysts) were added using micropipettes. A centrifugal evaporator was used to remove excess solvents. To these vials was then added 100  $\mu$ L of an appropriate solvent. The vials were sealed and stirred over blue LED lights at rt ( $\sim$ 24°C). After 24 hr, the reactions were exposed to air and diluted with 500  $\mu$ L of a 0.002  $\mu$ M solution of internal standard in MeCN. The vials were stirred for 5 min. Aliquots (25  $\mu$ L) were transferred into a 96-well UPLC block, diluted with MeCN (700  $\mu$ L) and then analyzed by UPLC.

**Table S2. Optimization of Solvent, Alkylsilicate Structure, and Photocatalyst using HTE<sup>a,b</sup>**

|                                                      |      | iodosilicate | bromosilicate |
|------------------------------------------------------|------|--------------|---------------|
| Ru(bpy) <sub>3</sub> (PF <sub>6</sub> ) <sub>2</sub> | MeCN | 15           | 8             |
|                                                      | DMF  | 41           | 39            |
|                                                      | MeOH | 13           | 10            |
|                                                      | HFIP | 43           | 18            |
| 4CzIPn                                               | MeCN | 12           | 9             |
|                                                      | DMF  | 16           | 12            |
|                                                      | MeOH | 2            | 10            |
|                                                      | HFIP | 19           | 6             |

<sup>a</sup> Values indicate ratio of P (pyrrolidine **2**) to IS (4,4'-di-*tert*-butylbiphenyl) by UPLC analysis <sup>b</sup> Structures of iridium photocatalysts given at end of this section.

**Table S3. Optimization of Solvent, Reagent Ratio, Additive, and Photocatalyst using HTE<sup>a,b</sup>**

| Imine : Silicate Ratio |                                                      | 1 : 2 |          |       |      |                      |                     |     |
|------------------------|------------------------------------------------------|-------|----------|-------|------|----------------------|---------------------|-----|
| Additives              |                                                      | none  | Lutidine | DIPEA | CSA  | Cu(Otf) <sub>2</sub> | PhCO <sub>2</sub> H |     |
|                        |                                                      | DMSO  | MesAc    | 2.47  | 1.87 | 0                    | 3.19                | 0.2 |
|                        | [Ir] 1                                               | 1.57  | 2.09     | 1.37  | 3.39 | 0.18                 | 0.85                |     |
|                        | 4CzIPn                                               | 1.63  | 2.23     | 1     | 3.27 | 0.18                 | 2.67                |     |
|                        | Ru(bpy) <sub>3</sub> (PF <sub>6</sub> ) <sub>2</sub> | 2.67  | 3.31     | 0.51  | 3.28 | 2                    | 1.97                |     |
| DMF                    | MesAc                                                | 1.02  | 0.74     | 0     | 1.88 | 0.31                 | 0.57                |     |
|                        | [Ir] 1                                               | 1.09  | 1.2      | 0.25  | 2.48 | 0                    | 0.75                |     |
|                        | 4CzIPn                                               | 1.01  | 1.86     | 0.27  | 2.17 | 0.24                 | 1.16                |     |
|                        | Ru(bpy) <sub>3</sub> (PF <sub>6</sub> ) <sub>2</sub> | 1.92  | 5.6      | 0.28  | 3.22 | 0.23                 | 2.77                |     |

  

| Imine : Silicate Ratio |                                                      | 2 : 1 |          |       |      |                      |                     |      |
|------------------------|------------------------------------------------------|-------|----------|-------|------|----------------------|---------------------|------|
| Additives              |                                                      | none  | Lutidine | DIPEA | CSA  | Cu(Otf) <sub>2</sub> | PhCO <sub>2</sub> H |      |
|                        |                                                      | DMSO  | MesAc    | 2.96  | 2.32 | 0                    | 0.37                | 0.54 |
|                        | [Ir] 1                                               | 4.6   | 4.7      | 2.29  | 0.81 | 0.27                 | 4.33                |      |
|                        | 4CzIPn                                               | 3.88  | 4.72     | 0.26  | 1.12 | 0.28                 | 0.38                |      |
|                        | Ru(bpy) <sub>3</sub> (PF <sub>6</sub> ) <sub>2</sub> | 4.52  | 4.26     | 0.76  | 2.62 | 1.23                 | 4.54                |      |
| DMF                    | MesAc                                                | 1.99  | 0        | 0     | 0.54 | 0.35                 | 1.98                |      |
|                        | [Ir] 1                                               | 3.23  | 2.45     | 0     | 1.49 | 0.9                  | 3.91                |      |
|                        | 4CzIPn                                               | 2.96  | 2.54     | 0.47  | 0.41 | 0.36                 | 3.46                |      |
|                        | Ru(bpy) <sub>3</sub> (PF <sub>6</sub> ) <sub>2</sub> | 2.77  | 2.35     | 0.49  | 2.05 | 0.39                 | 3.86                |      |

<sup>a</sup> Values indicate ratio of P (pyrrolidine **2**) to IS (4,4'-di-*tert*-butylbiphenyl) by UPLC analysis <sup>b</sup> Structures of iridium photocatalysts given at end of this section.



## General Procedure for RPC Annulation

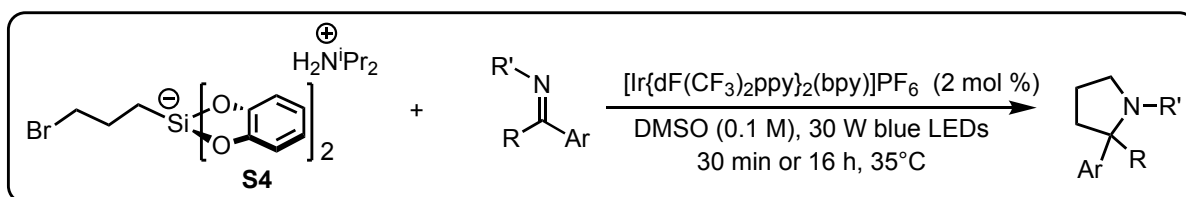

Bromoalkyl bis(catecholato)silicate (0.3 mmol, 1 equiv) was added to an 8 mL vial, followed by the imine (2 equiv) and the photocatalyst (2 mol %). Dry DMSO (0.1 M) was added to the vial and the solution was purged with argon for 5 min. The vial was then further sealed with Parafilm and irradiated using two 30W blue LED lamps (see “Photochemical Reactor Setup” from our previous publications) for (A) 30 min or (B) 16 h. After the adequate amount of time, the vial was removed from the chamber, and H<sub>2</sub>O and EtOAc were added. The phases were separated, and the aqueous phase was extracted with EtOAc. The organic phases were combined, washed with brine, dried (MgSO<sub>4</sub>), filtered and concentrated *in vacuo* by rotary evaporation. The crude mixture was then purified by column chromatography on silica gel in either hexane or hexane/EtOAc (100:0 to 90:10), depending on the polarity of the product. In a few cases, separation between product and starting material was still not total, and the mix was further subjected to preparatory TLC in either hexane or hexane:EtOAc (95:5) to yield the pure product, all of which were obtained as oils of various hues.

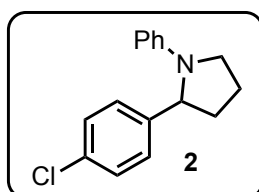

**2-(4-Chlorophenyl)-1-phenylpyrrolidine, 2** (46 mg, 60%) was prepared using the general procedure with ethyl 4-((4-chlorobenzylidene)amino)benzoate (0.129 g, 0.600 mmol), 3-bromopropyl bis(catecholato)silicate (0.140 g, 0.300 mmol), and iridium photocatalyst (6 mg, 0.006 mmol, 2 mol %) in DMSO (3 mL) for 16 h. Pyrrolidine **2** was obtained as a yellow oil.

**<sup>1</sup>H NMR** (CDCl<sub>3</sub>, 500 MHz) δ 7.27-7.25 (m, 2 H), 7.17-7.14 (m, 4 H), 6.66 (t, 1 H, *J* = 7.0 Hz), 6.47 (d, 2 H, *J* = 8.0 Hz), 4.69 (dd, 1 H, *J* = 8.5 Hz, 1.5 Hz), 3.72-3.69 (m, 1 H), 3.40 (dd, 1 H, *J* = 16.5 Hz, 8.0 Hz), 2.42-2.35 (m, 1 H), 2.03-1.97 (m, 2 H), 1.91-1.88 (m, 1 H)

**<sup>13</sup>C NMR** (CDCl<sub>3</sub>, 125 MHz) δ 147.3, 143.5, 132.5, 129.3, 128.9, 127.6, 116.4, 112.7, 62.7, 49.4, 36.3, 23.4

**FT-IR** (ATR) 2969, 2871, 1597, 1503, 1360 cm<sup>-1</sup>

**HRMS** (EI<sup>+</sup>) calcd for C<sub>16</sub>H<sub>16</sub>NCl [M]<sup>+</sup> 257.0971, found 257.0960

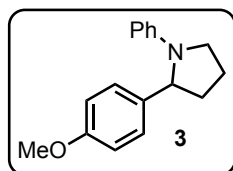

**2-(4-Methoxyphenyl)-1-phenylpyrrolidine, 3** (55 mg, 72%) was prepared using the general procedure with *N*-(4-methoxybenzylidene)aniline (0.127 g, 0.600 mmol), 3-bromopropyl bis(catecholato)silicate (0.140 g, 0.300 mmol), and iridium photocatalyst (6 mg, 0.006 mmol, 2 mol %) in DMSO (3 mL) for 30 min. Pyrrolidine **3** was obtained as a red-tinted oil.

**<sup>1</sup>H NMR** (CDCl<sub>3</sub>, 500 MHz) δ 7.17-7.14 (m, 4 H), 6.85 (d, 2 H, *J* = 8.5 Hz), 6.64 (t, 1 H, *J* = 7.0 Hz), 6.51 (d, 2 H, *J* = 8.1 Hz), 4.69 (d, 1 H, *J* = 8.0 Hz), 3.79 (s, 3 H), 3.70 (t, 1 H, *J* = 8.0 Hz), 3.40 (dd, 1 H, *J* = 16.0 Hz, 9.0 Hz), 2.40-2.32 (m, 1 H), 2.06-1.90 (m, 3 H)

**<sup>13</sup>C NMR** (CDCl<sub>3</sub>, 125 MHz) δ 158.6, 147.5, 136.9, 129.2, 127.2, 116.0, 114.1, 112.6, 62.6, 55.5, 49.3, 36.5, 23.4

**FT-IR** (ATR) 2966, 2833, 1597, 1504, 1245  $\text{cm}^{-1}$

**HRMS** ( $\text{EI}^+$ ) calcd for  $\text{C}_{17}\text{H}_{19}\text{NO}$  [ $\text{M}$ ] $^+$  253.1467, found 253.1461

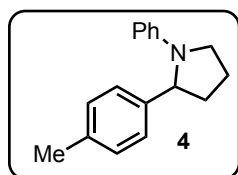

**1-Phenyl-2-(p-tolyl)pyrrolidine, 4** (40 mg, 56%) was prepared using the general procedure with *N*-(4-methylbenzylidene)aniline (0.117 g, 0.600 mmol), 3-bromopropyl bis(catecholato)silicate (0.140 g, 0.300 mmol), and iridium photocatalyst (6 mg, 0.006 mmol, 2 mol %) in DMSO (3 mL) for 30 min. Pyrrolidine **4** was obtained as a colorless oil.

**$^1\text{H}$  NMR** ( $\text{CDCl}_3$ , 500 MHz)  $\delta$  7.18-7.11 (m, 6 H), 6.65 (t, 1 H,  $J = 7.0$  Hz), 6.52 (d, 2 H,  $J = 8.0$  Hz), 4.72 (dd, 1 H,  $J = 8.0$  Hz, 1.5 Hz), 3.73-3.69 (m, 1 H), 3.44-3.39 (m, 1 H), 2.43-2.34 (m, 1 H), 2.32 (s, 3 H), 2.10-1.92 (m, 3 H)

**$^{13}\text{C}$  NMR** ( $\text{CDCl}_3$ , 125 MHz)  $\delta$  147.5, 141.9, 136.4, 129.4, 129.2, 126.1, 115.9, 112.6, 62.9, 49.3, 36.4, 23.4, 21.3

**FT-IR** (ATR) 2968, 2871, 1598, 1504, 1362  $\text{cm}^{-1}$

**HRMS** ( $\text{EI}^+$ ) calcd for  $\text{C}_{17}\text{H}_{19}\text{N}$  [ $\text{M}$ ] $^+$  237.1517, found 237.1517

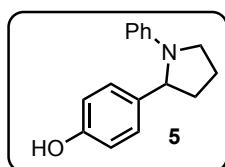

**4-(1-Phenylpyrrolidin-2-yl)phenol, 5** (45 mg, 63%) was prepared using the general procedure with 4-((phenylimino)methyl)phenol (0.118 g, 0.600 mmol), 3-bromopropyl bis(catecholato)silicate (0.140 g, 0.300 mmol), and iridium photocatalyst (6 mg, 0.006 mmol, 2 mol %) in DMSO (3 mL) for 16 h. Pyrrolidine **5** was obtained as a yellow oil.

**$^1\text{H}$  NMR** ( $\text{CDCl}_3$ , 500 MHz)  $\delta$  7.14 (t, 2 H,  $J = 7.5$  Hz), 7.09 (d, 2 H,  $J = 7.9$  Hz), 6.75 (d, 2 H,  $J = 7.9$  Hz), 6.63 (t, 1 H,  $J = 7.0$  Hz), 6.49 (d, 2 H,  $J = 8.0$  Hz), 4.67 (d, 1 H,  $J = 7.5$  Hz), 4.56 (s, 1 H), 3.68 (t, 1 H,  $J = 7.0$  Hz), 3.38 (dd, 1 H,  $J = 15.5$  Hz, 8.0 Hz), 2.38-2.31 (m, 1 H), 2.05-1.88 (m, 3 H)

**$^{13}\text{C}$  NMR** ( $\text{CDCl}_3$ , 125 MHz)  $\delta$  154.5, 147.5, 137.2, 129.3, 127.4, 116.0, 115.6, 112.6, 62.6, 49.3, 36.5, 23.4

**FT-IR** (ATR) 3402, 2966, 2871, 1597, 1505, 1363  $\text{cm}^{-1}$

**HRMS** ( $\text{EI}^+$ ) calcd for  $\text{C}_{16}\text{H}_{18}\text{NO}$  [ $\text{M}+\text{H}$ ] $^+$  240.1388, found 240.1390

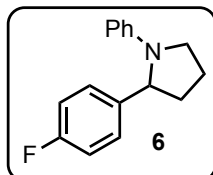

**2-(4-Fluorophenyl)-1-phenylpyrrolidine, 6** (50 mg, 69%) was prepared using the general procedure with *N*-(4-fluorobenzylidene)aniline (0.119 g, 0.600 mmol), 3-bromopropyl bis(catecholato)silicate (0.140 g, 0.300 mmol), and iridium photocatalyst (6 mg, 0.006 mmol, 2 mol %) in DMSO (3 mL) for 30 min. Pyrrolidine **6** was obtained as a yellow oil.

**$^1\text{H}$  NMR** ( $\text{CDCl}_3$ , 500 MHz)  $\delta$  7.20-7.14 (m, 4 H), 6.98 (t, 2 H,  $J = 8.5$  Hz), 6.66 (t, 1 H,  $J = 7.0$  Hz), 6.49 (d, 2 H,  $J = 8.0$  Hz), 4.70 (d, 1 H,  $J = 7.1$  Hz), 3.72-3.69 (m, 1 H), 3.41 (dd, 1 H,  $J = 16.3$  Hz, 8.8 Hz), 2.38 (tt, 1 H,  $J = 10.8$  Hz, 8.0 Hz), 2.04-1.98 (m, 2 H), 1.93-1.90 (m, 1 H)

**$^{13}\text{C}$  NMR** ( $\text{CDCl}_3$ , 125 MHz)  $\delta$  162.0 (d,  $^1J_{\text{CF}} = 244.1$  Hz), 147.3, 140.5, 129.3, 127.6 (d,  $^3J_{\text{CF}} = 8.0$  Hz), 116.3, 115.5 (d,  $^2J_{\text{CF}} = 21.3$  Hz), 112.7, 62.6, 49.4, 36.4, 23.3



<sup>19</sup>F NMR (CDCl<sub>3</sub>, 476 MHz) δ -116.6 (s, 1 F)

FT-IR (ATR) 2969, 2872, 1597, 1504, 1361 cm<sup>-1</sup>

HRMS (EI<sup>+</sup>) calcd for C<sub>16</sub>H<sub>16</sub>NF [M]<sup>+</sup> 241.1267, found 241.1281

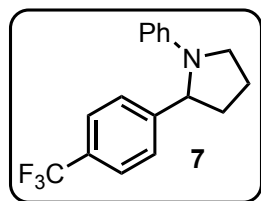

**1-Phenyl-2-(4-(trifluoromethyl)phenyl)pyrrolidine, 7** (64 mg, 73%) was prepared using the general procedure with *N*-(4-(trifluoromethyl)benzylidene)aniline (0.150 g, 0.600 mmol), 3-bromopropyl bis(catecholato)silicate (0.140 g, 0.300 mmol), and iridium photocatalyst (6 mg, 0.006 mmol, 2 mol %) in DMSO (3 mL) for 16 h. Pyrrolidine **7** was obtained as a yellow oil.

<sup>1</sup>H NMR (CDCl<sub>3</sub>, 500 MHz) δ 7.57 (d, 2 H, *J* = 8.0 Hz), 7.36 (d, 2 H, *J* = 8.0 Hz), 7.18 (t, 2 H, *J* = 7.5 Hz), 6.69 (t, 1 H, *J* = 7.0 Hz), 6.49 (d, 2 H, *J* = 8.0 Hz), 4.78 (d, 1 H, *J* = 7.9 Hz), 3.77-3.73 (m, 1 H), 3.45 (dd, 1 H, *J* = 16.5 Hz, 8.2 Hz), 2.48-2.41 (m, 1 H), 2.04-2.02 (m, 2 H), 1.96-1.94 (m, 1 H)

<sup>13</sup>C NMR (CDCl<sub>3</sub>, 125 MHz) δ 149.2, 147.2, 129.4, 129.3 (q, <sup>2</sup>*J*<sub>CF</sub> = 32.3 Hz), 126.6, 125.8 (q, <sup>3</sup>*J*<sub>CF</sub> = 3.6 Hz), 124.6 (q, <sup>1</sup>*J*<sub>CF</sub> = 272.0 Hz), 116.6, 112.7, 62.9, 49.5, 36.2, 23.4

<sup>19</sup>F NMR (CDCl<sub>3</sub>, 476 MHz) δ -62.2 (s, 3 F)

FT-IR (ATR) 2973, 2874, 1599, 1505, 1322, 1120 cm<sup>-1</sup>

HRMS (EI<sup>+</sup>) calcd for C<sub>17</sub>H<sub>16</sub>NF<sub>3</sub> [M]<sup>+</sup> 291.1235, found 291.1248

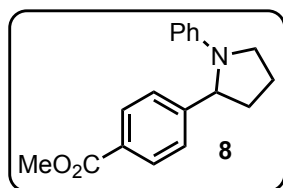

**Methyl 4-(1-phenylpyrrolidin-2-yl)benzoate, 8** (46 mg, 55%) was prepared using the general procedure with methyl 4-((phenylimino)methyl)benzoate (0.148 g, 0.600 mmol), 3-bromopropyl bis(catecholato)silicate (0.140 g, 0.300 mmol), and iridium photocatalyst (6 mg, 0.006 mmol, 2 mol %) in DMSO (3 mL) for 30 min. Pyrrolidine **8** was obtained as a colorless oil.

<sup>1</sup>H NMR (CDCl<sub>3</sub>, 500 MHz) δ 7.97 (d, 2 H, *J* = 7.5 Hz), 7.30 (d, 2 H, *J* = 7.5 Hz), 7.14 (t, 2 H, *J* = 7.0 Hz), 6.65 (t, 1 H, *J* = 7.0 Hz), 6.46 (d, 2 H, *J* = 7.5 Hz), 4.75 (d, 1 H, *J* = 7.5 Hz), 3.89 (s, 3 H), 3.75-3.71 (m, 1 H), 3.43 (dd, 1 H, *J* = 15.9 Hz, 7.5 Hz), 2.46-2.39 (m, 1 H), 2.04-2.00 (m, 2 H), 1.95-1.93 (m, 1 H)

<sup>13</sup>C NMR (CDCl<sub>3</sub>, 125 MHz) δ 167.3, 150.5, 147.2, 130.2, 129.3, 129.0, 126.2, 116.4, 112.7, 63.2, 52.3, 49.5, 36.2, 23.4

FT-IR (ATR) 2949, 2844, 1721, 1505, 1277 cm<sup>-1</sup>

HRMS (EI<sup>+</sup>) calcd for C<sub>18</sub>H<sub>20</sub>NO<sub>2</sub> [M+H]<sup>+</sup> 282.1494, found 282.1495

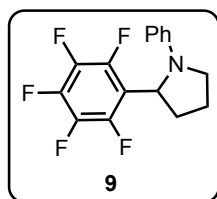

**2-(Perfluorophenyl)-1-phenylpyrrolidine, 9** (55 mg, 58%) was prepared using the general procedure with *N*-((perfluorophenyl)methylene)aniline (0.165 g, 0.600 mmol), 3-bromopropyl bis(catecholato)silicate (0.140 g, 0.300 mmol), and iridium photocatalyst (6 mg, 0.006 mmol, 2 mol %) in DMSO (3 mL) for 30 min. Pyrrolidine **9** was obtained as a yellow oil.

**<sup>1</sup>H NMR** (CDCl<sub>3</sub>, 500 MHz) δ 7.19 (t, 2 H, *J* = 7.0 Hz), 6.69 (t, 1 H, *J* = 7.0 Hz), 6.48 (d, 2 H, *J* = 7.5 Hz), 5.22 (d, 1 H, *J* = 4.5 Hz), 3.65-3.62 (m, 1 H), 3.50-3.46 (m, 1 H), 2.57-2.54 (m, 1 H), 2.22-2.17 (m, 1 H), 2.12-2.08 (m, 2 H)

**<sup>13</sup>C NMR** (CDCl<sub>3</sub>, 125 MHz) δ 146.0, 146.0-143.8 (m), 141.4-139.2 (m), 139.0-136.7 (m), 129.5, 117.8-117.6 (m), 116.8, 112.1, 53.5, 48.7, 34.5, 24.7

**<sup>19</sup>F NMR** (CDCl<sub>3</sub>, 476 MHz) δ -144.7 (dd, 2 F, *J* = 22.0 Hz, 8.0 Hz), -156.1 (t, 1 F, *J* = 22.0 Hz), -161.9 (td, 2 F, *J* = 22.0 Hz, 8.0 Hz)

**FT-IR** (ATR) 2975, 2854, 1599, 1497, 1369 cm<sup>-1</sup>

**HRMS** (EI<sup>+</sup>) calcd for C<sub>16</sub>H<sub>12</sub>NF<sub>5</sub> [M]<sup>+</sup> 313.0890, found 313.0905

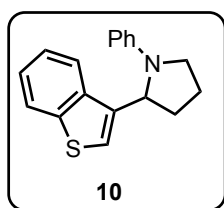

**2-(Benzo[β]thiophen-3-yl)-1-phenylpyrrolidine, 10** (20 mg, 24%) was prepared using the general procedure with *N*-(benzo[β]thiophen-3-ylmethylene)aniline (0.141 g, 0.600 mmol), 3-bromopropyl bis(catecholato)silicate (0.140 g, 0.300 mmol), and iridium photocatalyst (6 mg, 0.006 mmol, 2 mol %) in DMSO (3 mL) for 16 h. Pyrrolidine **10** was obtained as a brown oil.

**<sup>1</sup>H NMR** (CDCl<sub>3</sub>, 500 MHz) δ 7.76 (d, 1 H, *J* = 8.0 Hz), 7.66 (d, 1 H, *J* = 8.0 Hz), 7.31 (t, 2 H, *J* = 7.5 Hz), 7.26 (t, 2 H, *J* = 7.5 Hz), 7.13 (s, 1 H), 6.70 (t, 1 H, *J* = 7.5 Hz), 6.66 (d, 2 H, *J* = 8.0 Hz), 5.02 (d, 1 H, *J* = 7.9 Hz), 3.73 (t, 1 H, *J* = 7.5 Hz), 3.39-3.34 (m, 1 H), 2.44-2.36 (m, 1 H), 2.27-2.14 (m, 2 H), 2.10-2.05 (m, 1 H)

**<sup>13</sup>C NMR** (CDCl<sub>3</sub>, 125 MHz) δ 151.2, 147.3, 140.4, 139.5, 129.4, 124.4, 123.9, 123.4, 122.7, 119.7, 116.9, 112.7, 59.8, 49.0, 36.2, 23.8

**FT-IR** (ATR) 2969, 2851, 1598, 1503, 1341 cm<sup>-1</sup>

**HRMS** (EI<sup>+</sup>) calcd for C<sub>18</sub>H<sub>17</sub>NS [M]<sup>+</sup> 279.1082, found 279.1084

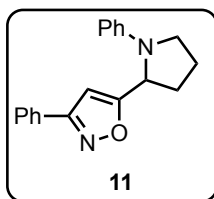

**3-Phenyl-5-(1-phenylpyrrolidin-2-yl)isoxazole, 11** (55 mg, 63%) was prepared using the general procedure with *N*-((3-phenylisoxazol-5-yl)methylene)aniline (**S3**) (0.149 g, 0.600 mmol), 3-bromopropyl bis(catecholato)silicate (0.140 g, 0.300 mmol), and iridium photocatalyst (6 mg, 0.006 mmol, 2 mol %) in DMSO (3 mL) for 16 h. Pyrrolidine **11** was obtained as a yellow oil.

**<sup>1</sup>H NMR** (CDCl<sub>3</sub>, 500 MHz) δ 7.76 (dd, 2 H, *J* = 6.5 Hz, 3.0 Hz), 7.42-7.41 (m, 3 H), 7.23 (t, 2 H, *J* = 8.0 Hz), 6.74 (t, 1 H, *J* = 7.3 Hz), 6.61 (d, 2 H, *J* = 8.0 Hz), 6.32 (s, 1 H), 4.93 (d, 1 H, *J* = 7.5 Hz), 3.68-3.65 (m, 1 H), 3.36 (q, 1 H, *J* = 9.0 Hz), 2.39-2.28 (m, 2 H), 2.15-2.09 (m, 2 H)

**<sup>13</sup>C NMR** (CDCl<sub>3</sub>, 125 MHz) δ 175.4, 162.6, 146.9, 130.2, 129.5, 129.3, 129.1, 127.1, 117.2, 112.6, 100.0, 56.6, 48.5, 32.6, 23.9

**FT-IR** (ATR) 2974, 2849, 1596, 1504, 1363 cm<sup>-1</sup>

**HRMS** (EI<sup>+</sup>) calcd for C<sub>19</sub>H<sub>18</sub>N<sub>2</sub>O [M]<sup>+</sup> 290.1419, found 290.1433

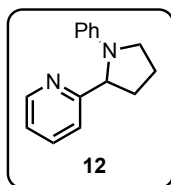

**2-(1-Phenylpyrrolidin-2-yl)pyridine, 12** (47 mg, 70%) was prepared using the general procedure with *N*-(pyridin-2-ylmethylene)aniline (0.109 g, 0.600 mmol), 3-bromopropyl bis(catecholato)silicate (0.140 g, 0.300 mmol), and iridium photocatalyst (6 mg, 0.006 mmol, 2 mol %) in DMSO (3 mL) for 16 h. Pyrrolidine **12** was obtained as a yellow oil.

**<sup>1</sup>H NMR** (CDCl<sub>3</sub>, 500 MHz) δ 8.62 (d, 1 H, *J* = 4.0 Hz), 7.55 (t, 1 H, *J* = 7.5 Hz), 7.18-7.14 (m, 4 H), 6.67 (t, 1 H, *J* = 7.0 Hz), 6.51 (d, 2 H, *J* = 8.0 Hz), 4.84 (d, 1 H, *J* = 8.5 Hz), 3.77-3.73 (m, 1 H), 3.45 (dd, 1 H, *J* = 16.5 Hz, 8.5 Hz), 2.51-2.43 (m, 1 H), 2.16-2.13 (m, 1 H), 2.04-1.98 (m, 2 H)

**<sup>13</sup>C NMR** (CDCl<sub>3</sub>, 125 MHz) δ 164.2, 149.8, 147.3, 136.9, 129.3, 122.0, 120.4, 116.4, 112.7, 65.0, 49.5, 34.6, 23.5

**FT-IR** (ATR) 2970, 2871, 1597, 1503, 1360 cm<sup>-1</sup>

**HRMS** (EI<sup>+</sup>) calcd for C<sub>15</sub>H<sub>17</sub>N<sub>2</sub> [M+H]<sup>+</sup> 225.1392, found 225.1376

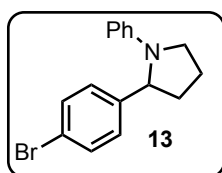

**2-(4-Bromophenyl)-1-phenylpyrrolidine, 13** (76 mg, 84%) was prepared using the general procedure with *N*-(4-bromobenzylidene)aniline (0.155 g, 0.600 mmol), 3-bromopropyl bis(catecholato)silicate (0.140 g, 0.300 mmol), and iridium photocatalyst (6 mg, 0.006 mmol, 2 mol %) in DMSO (3 mL) for 16 h. Pyrrolidine **13** was obtained as a yellow-tinted oil.

**<sup>1</sup>H NMR** (CDCl<sub>3</sub>, 500 MHz) δ 7.44 (d, 2 H, *J* = 8.0 Hz), 7.18 (d, 2 H, *J* = 8.0 Hz), 7.13 (d, 2 H, *J* = 8.0 Hz), 6.68 (t, 1 H, *J* = 7.2 Hz), 6.50 (d, 2 H, *J* = 8.0 Hz), 4.69 (d, 1 H, *J* = 7.0 Hz), 3.74-3.71 (m, 1 H), 3.42 (dd, 1 H, *J* = 16.5 Hz, 8.5 Hz), 2.44-2.37 (m, 1 H), 2.05-1.99 (m, 2 H), 1.93-1.91 (m, 1 H)

**<sup>13</sup>C NMR** (CDCl<sub>3</sub>, 125 MHz) δ 147.2, 144.0, 131.8, 129.3, 128.0, 120.6, 116.4, 112.7, 62.7, 49.4, 36.3, 23.3

**FT-IR** (ATR) 2968, 2870, 1597, 1503, 1359 cm<sup>-1</sup>

**HRMS** (EI<sup>+</sup>) calcd for C<sub>16</sub>H<sub>16</sub>N<sup>81</sup>Br [M]<sup>+</sup> 303.0446, found 303.0445

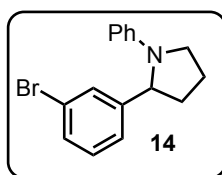

**2-(3-Bromophenyl)-1-phenylpyrrolidine, 14** (52 mg, 57%) was prepared using the general procedure with *N*-(3-bromobenzylidene)aniline **S1** (0.155 g, 0.600 mmol), 3-bromopropyl bis(catecholato)silicate (0.140 g, 0.300 mmol), and iridium photocatalyst (6 mg, 0.006 mmol, 2 mol %) in DMSO (3 mL) for 30 min. Pyrrolidine **14** was obtained as a yellow oil.

**<sup>1</sup>H NMR** (CDCl<sub>3</sub>, 500 MHz) δ 7.41 (s, 1 H), 7.37-7.35 (m, 1 H), 7.19-7.16 (m, 4 H), 6.68 (t, 1 H, *J* = 7.5 Hz), 6.50 (d, 2 H, *J* = 8.0 Hz), 4.68 (dd, 1 H, *J* = 8.5 Hz, 2.0 Hz), 3.75-3.71 (m, 1 H), 3.41 (td, 1 H, *J* = 9.0 Hz, 7.0 Hz), 2.43-2.36 (m, 1 H), 2.09-1.97 (m, 2 H), 1.95-1.91 (m, 1 H)

**<sup>13</sup>C NMR** (CDCl<sub>3</sub>, 125 MHz) δ 147.7, 147.3, 130.4, 130.1, 129.3, 129.2, 124.9, 123.1, 116.5, 112.7, 62.9, 49.5, 36.3, 23.3

**FT-IR** (ATR) 2969, 2870, 1598, 1504, 1360 cm<sup>-1</sup>

**HRMS** (EI<sup>+</sup>) calcd for C<sub>16</sub>H<sub>16</sub>N<sup>81</sup>Br [M]<sup>+</sup> 303.0446, found 303.0470

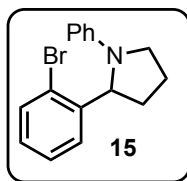

**2-(2-Bromophenyl)-1-phenylpyrrolidine, 15** (61 mg, 67%) was prepared using the general procedure with *N*-(2-bromobenzylidene)aniline (0.155 g, 0.600 mmol), 3-bromopropyl bis(catecholato)silicate (0.140 g, 0.300 mmol), and iridium photocatalyst (6 mg, 0.006 mmol, 2 mol %) in DMSO (3 mL) for 30 min. Pyrrolidine **15** was obtained as a colorless oil.

**<sup>1</sup>H NMR** (CDCl<sub>3</sub>, 500 MHz) δ 7.59 (d, 1 H, *J* = 7.5 Hz), 7.19-7.08 (m, 5 H), 6.66 (t, 1 H, *J* = 7.0 Hz), 6.43 (d, 2 H, *J* = 8.0 Hz), 4.99 (d, 1 H, *J* = 8.5 Hz), 3.76-3.75 (m, 1 H), 3.44 (dd, 1 H, *J* = 16.0 Hz, 8.0 Hz), 2.48-2.41 (m, 1 H), 2.02-1.97 (m, 3 H)

**<sup>13</sup>C NMR** (CDCl<sub>3</sub>, 125 MHz) δ 147.0, 142.9, 133.3, 129.4, 128.6, 128.0, 127.7, 122.5, 116.4, 112.6, 63.1, 49.6, 34.3, 23.2

**FT-IR** (ATR) 2971, 2834, 1598, 1504, 1362 cm<sup>-1</sup>

**HRMS** (EI<sup>+</sup>) calcd for C<sub>16</sub>H<sub>16</sub>N<sup>79</sup>Br [M]<sup>+</sup> 301.0466, found 301.0462

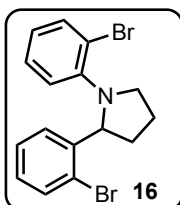

**1,2-Bis(2-bromophenyl)pyrrolidine, 16** (244 mg, 64%) was prepared using the general procedure with 2-bromo-*N*-(2-bromobenzylidene)aniline (0.678 g, 2.00 mmol), 3-bromopropyl bis(catecholato)-silicate (0.466 g, 1.00 mmol), and iridium photocatalyst (10 mg, 0.01 mmol, 1 mol %) in DMSO (10 mL) for 16 h. Pyrrolidine **16** was obtained as a colorless oil.

**<sup>1</sup>H NMR** (CDCl<sub>3</sub>, 500 MHz) δ 7.51-7.48 (m, 3 H), 7.17 (t, 1 H, *J* = 7.5 Hz), 7.07 (t, 1 H, *J* = 7.5 Hz), 7.01 (t, 1 H, *J* = 7.5 Hz), 6.81 (d, 1 H, *J* = 8.0 Hz), 6.73 (t, 1 H, *J* = 7.5 Hz), 5.08 (t, 1 H, *J* = 7.5 Hz), 4.37 (dd, 1 H, *J* = 16.0 Hz, 7.5 Hz), 3.07-3.03 (m, 1 H), 2.63-2.62 (m, 1 H), 2.09-2.08 (m, 1 H), 2.02-1.93 (m, 1 H), 1.73-1.65 (m, 1 H)

**<sup>13</sup>C NMR** (CDCl<sub>3</sub>, 125 MHz) δ 147.8, 142.1, 134.4, 132.7, 128.5, 128.3, 128.1, 128.0, 123.4, 122.8, 120.3, 117.0, 63.5, 54.4, 34.6, 24.9

**FT-IR** (ATR) 2971, 2876, 1586, 1474, 1312, 1022 cm<sup>-1</sup>

**HRMS** (EI<sup>+</sup>) calcd for C<sub>16</sub>H<sub>15</sub>NBr<sub>2</sub> [M]<sup>+</sup> 378.9571, found 378.9556

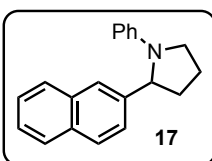

**2-(Naphthalen-2-yl)-1-phenylpyrrolidine, 17** (43 mg, 52%) was prepared using the general procedure with *N*-(naphthalen-2-ylmethylene)aniline (0.140 g, 0.600 mmol), 3-bromopropyl bis(catecholato)silicate (0.140 g, 0.300 mmol), and iridium photocatalyst (6 mg, 0.006 mmol, 2 mol %) in DMSO (3 mL) for 16 h. Pyrrolidine **17** was obtained as a colorless oil.

**<sup>1</sup>H NMR** (CDCl<sub>3</sub>, 500 MHz) δ 7.82-7.81 (m, 2 H), 7.77-7.76 (m, 1 H), 7.66 (s, 1 H), 7.46-7.41 (m, 2 H), 7.39 (dd, 1 H, *J* = 8.5 Hz, 1.5 Hz), 7.14 (dd, 2 H, *J* = 8.5 Hz, 7.5 Hz), 6.64 (t, 1 H, *J* = 7.5 Hz), 6.55 (d, 2 H, *J* = 8.3 Hz), 4.88 (d, 1 H, *J* = 8.3 Hz), 3.82-3.79 (m, 1 H), 3.47 (td, 1 H, *J* = 9.0 Hz, 7.0 Hz), 2.49-2.41 (m, 1 H), 2.14-2.06 (m, 1 H), 2.04-1.99 (m, 2 H)

**<sup>13</sup>C NMR** (CDCl<sub>3</sub>, 125 MHz) δ 147.6, 142.4, 133.7, 132.9, 129.3, 128.6, 128.1, 127.9, 126.3, 125.7, 124.9, 124.6, 116.2, 112.7, 63.5, 49.5, 36.2, 23.4

**FT-IR** (ATR) 2968, 2870, 1598, 1504, 1371 cm<sup>-1</sup>

**HRMS** (EI<sup>+</sup>) calcd for C<sub>20</sub>H<sub>19</sub>N [M]<sup>+</sup> 273.1517, found 273.1518

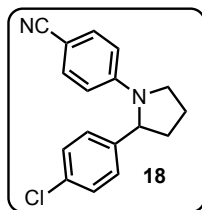

**4-(2-(4-Chlorophenyl)pyrrolidin-1-yl)benzonitrile, 18** (50 mg, 59%) was prepared using the general procedure with 4-((4-chlorobenzylidene)amino)benzonitrile (0.143 g, 0.600 mmol), 3-bromopropyl bis(catecholato)silicate (0.140 g, 0.300 mmol), and iridium photocatalyst (6 mg, 0.006 mmol, 2 mol %) in DMSO (3 mL) for 30 min. Pyrrolidine **18** was obtained as a colorless oil.

**<sup>1</sup>H NMR** (CDCl<sub>3</sub>, 500 MHz) δ 7.37 (d, 2 H, *J* = 9.0 Hz), 7.30-7.26 (m, 2 H), 7.07 (d, 2 H, *J* = 8.5 Hz), 6.43 (d, 2 H, *J* = 9.0 Hz), 4.77 (dd, 1 H, *J* = 8.5 Hz, 2.0 Hz), 3.73-3.69 (m, 1 H), 3.47 (dd, 1 H, *J* = 16.5 Hz, 9.0 Hz), 2.47-2.39 (m, 1 H), 2.06-2.00 (m, 2 H), 1.97-1.93 (m, 1 H)

**<sup>13</sup>C NMR** (CDCl<sub>3</sub>, 125 MHz) δ 149.6, 141.5, 133.6, 133.1, 129.2, 127.3, 120.9, 112.7, 98.1, 77.6, 77.3, 77.1, 62.6, 49.3, 36.1, 23.1

**FT-IR** (ATR) 2972, 2854, 2211, 1603, 1517, 1378, 1175 cm<sup>-1</sup>

**HRMS** (EI<sup>+</sup>) calcd for C<sub>17</sub>H<sub>15</sub>N<sub>2</sub>Cl [M]<sup>+</sup> 283.1002, found 283.1004

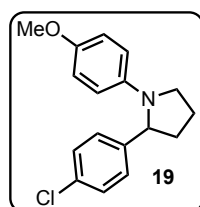

**2-(4-Chlorophenyl)-1-(4-methoxyphenyl)pyrrolidine, 19** (48 mg, 55%) was prepared using the general procedure with *N*-(4-chlorobenzylidene)-4-methoxyaniline (0.150 g, 0.600 mmol), 3-bromopropyl bis(catecholato)silicate (0.140 g, 0.300 mmol), and iridium photocatalyst (6 mg, 0.006 mmol, 2 mol %) in DMSO (3 mL) for 16 h. Pyrrolidine **19** was obtained as a yellow oil.

**<sup>1</sup>H NMR** (CDCl<sub>3</sub>, 500 MHz) δ 7.27-7.25 (m, 2 H), 7.17 (d, 2 H, *J* = 8.5 Hz), 6.76 (d, 2 H, *J* = 9.0 Hz), 6.41 (d, 2 H, *J* = 9.0 Hz), 4.59 (dd, 1 H, *J* = 8.5 Hz, 2.5 Hz), 3.71 (s, 3 H), 3.71-3.67 (m, 1 H), 3.34 (dd, 1 H, *J* = 16.0 Hz, 9.0 Hz), 2.42-2.36 (m, 1 H), 2.03-1.95 (m, 2 H), 1.89-1.84 (m, 1 H)

**<sup>13</sup>C NMR** (CDCl<sub>3</sub>, 125 MHz) δ 151.3, 144.0, 142.2, 132.4, 128.9, 127.6, 115.1, 113.4, 63.1, 56.2, 50.0, 36.5, 23.6

**FT-IR** (ATR) 2944, 2830, 1509, 1236, 1039 cm<sup>-1</sup>

**HRMS** (EI<sup>+</sup>) calcd for C<sub>17</sub>H<sub>18</sub>NOCl [M]<sup>+</sup> 287.1077, found 287.1070

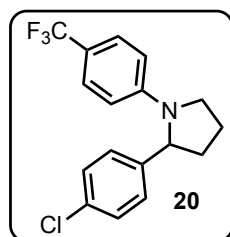

**2-(4-Chlorophenyl)-1-(4-(trifluoromethyl)phenyl)pyrrolidine, 20** (50 mg, 51%) was prepared using the general procedure with *N*-(4-chlorobenzylidene)-4-(trifluoromethyl)aniline (0.170 g, 0.600 mmol), 3-bromopropyl bis(catecholato)silicate (0.140 g, 0.300 mmol), and iridium photocatalyst (6 mg, 0.006 mmol, 2 mol %) in DMSO (3 mL) for 30 min. Pyrrolidine **20** was obtained as a yellow oil.

**<sup>1</sup>H NMR** (CDCl<sub>3</sub>, 500 MHz) δ 7.37 (d, 2 H, *J* = 8.5 Hz), 7.28 (d, 2 H, *J* = 8.5 Hz), 7.11 (d, 2 H, *J* = 8.5 Hz), 6.47 (d, 2 H, *J* = 8.5 Hz), 4.75 (dd, 1 H, *J* = 8.5 Hz, 2.0 Hz), 3.74-3.70 (m, 1 H), 3.46 (q, 1 H, *J* = 8.5 Hz), 2.46-2.38 (m, 1 H), 2.06-2.00 (m, 2 H), 1.97-1.92 (m, 1 H)

**<sup>13</sup>C NMR** (CDCl<sub>3</sub>, 125 MHz) δ 149.2, 142.2, 132.9, 129.1, 127.5, 126.6 (q, <sup>3</sup>*J*<sub>CF</sub> = 4 Hz), 125.4 (q, <sup>1</sup>*J*<sub>CF</sub> = 270 Hz), 118.0 (q, <sup>2</sup>*J*<sub>CF</sub> = 33 Hz), 112.1, 62.6, 49.4, 36.2, 23.2

**<sup>19</sup>F NMR** (CDCl<sub>3</sub>, 476 MHz) δ -60.7 (s, 3 F)

**FT-IR** (ATR) 2975, 2874, 1615, 1321, 1104 cm<sup>-1</sup>

**HRMS** (EI<sup>+</sup>) calcd for C<sub>17</sub>H<sub>15</sub>NF<sub>3</sub>Cl [M]<sup>+</sup> 325.0845, found 325.0830

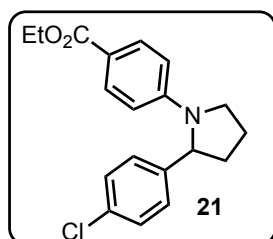

**Ethyl 4-(2-(4-chlorophenyl)pyrrolidin-1-yl)benzoate, 21** (50 mg, 51%) was prepared using the general procedure with ethyl 4-((4-chlorobenzylidene)amino)benzoate (0.171 g, 0.600 mmol), 3-bromopropyl bis(catecholato)silicate (0.140 g, 0.300 mmol), and iridium photocatalyst (6 mg, 0.006 mmol, 2 mol %) in DMSO (3 mL) for 30 min. Pyrrolidine **21** was obtained as a yellow oil.

**<sup>1</sup>H NMR** (CDCl<sub>3</sub>, 500 MHz) δ 7.84 (d, 2 H, *J* = 8.5 Hz), 7.27 (d, 2 H, *J* = 8.5 Hz), 7.10 (d, 2 H, *J* = 8.5 Hz), 6.43 (d, 2 H, *J* = 8.5 Hz), 4.80 (d, 1 H, *J* = 8.0 Hz), 4.32-4.28 (m, 2 H), 3.76-3.72 (m, 1 H), 3.49 (dd, 1 H, *J* = 17.0 Hz, 8.5 Hz), 2.46-2.38 (m, 1 H), 2.05-1.99 (m, 2 H), 1.96-1.93 (m, 1 H), 1.34 (t, 3 H, *J* = 7.0 Hz)

**<sup>13</sup>C NMR** (CDCl<sub>3</sub>, 125 MHz) δ 167.2, 150.2, 142.1, 132.8, 131.4, 129.0, 127.4, 117.9, 111.9, 62.5, 60.3, 49.3, 36.1, 23.1, 14.7

**FT-IR** (ATR) 2976, 2872, 1698, 1605, 1365, 1274 cm<sup>-1</sup>

**HRMS** (EI<sup>+</sup>) calcd for C<sub>19</sub>H<sub>20</sub>NO<sub>2</sub>Cl [M]<sup>+</sup> 330.1261, found 330.1274

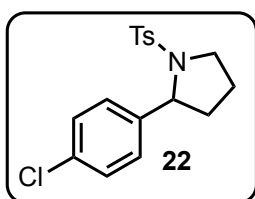

**2-(4-Chlorophenyl)-1-tosylpyrrolidine, 22** (30 mg, 30%) was prepared using the general procedure with *N*-(4-chlorobenzylidene)-4-methylbenzenesulfonamide (0.175 g, 0.600 mmol), 3-bromopropyl bis(catecholato)silicate (0.140 g, 0.300 mmol), and iridium photocatalyst (6 mg, 0.006 mmol, 2 mol %) in DMSO (3 mL) for 16 h. Pyrrolidine **22** was obtained as a yellow oil.

**<sup>1</sup>H NMR** (CDCl<sub>3</sub>, 500 MHz) δ 7.66 (d, 2 H, *J* = 8.0 Hz), 7.30-7.23 (m, 6 H), 4.73 (dd, 1 H, *J* = 8.0 Hz, 4.0 Hz), 3.63-3.58 (m, 1 H), 3.44-3.39 (m, 1 H), 2.43 (s, 3 H), 2.03-1.96 (m, 1 H), 1.88-1.74 (m, 2 H), 1.70-1.64 (m, 1 H)

**<sup>13</sup>C NMR** (CDCl<sub>3</sub>, 125 MHz) δ 143.8, 141.9, 135.3, 133.1, 129.9, 128.8, 127.9, 127.8, 63.0, 49.7, 36.1, 24.3, 21.8

**FT-IR** (ATR) 2976, 2880, 1492, 1346, 1159 cm<sup>-1</sup>

**HRMS** (EI<sup>+</sup>) calcd for C<sub>17</sub>H<sub>18</sub>NO<sub>2</sub>SI [M]<sup>+</sup> 335.0747, found 335.0757

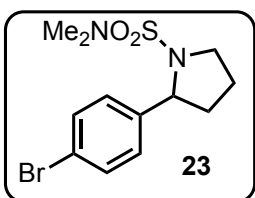

**2-(4-Bromophenyl)-*N,N*-dimethylpyrrolidine-1-sulfonamide, 23** (38 mg, 38%) was prepared using the general procedure with *N*-(4-chlorobenzylidene)-4-methylbenzenesulfonamide (0.175 g, 0.600 mmol), 3-bromopropyl bis(catecholato)silicate (0.140 g, 0.300 mmol), and iridium photocatalyst (6 mg, 0.006 mmol, 2 mol %) in DMSO (3 mL) for 16 h. Pyrrolidine **23** was obtained as a colorless oil.

**<sup>1</sup>H NMR** (CDCl<sub>3</sub>, 500 MHz) δ 7.45 (d, 2 H, *J* = 8.5 Hz), 7.19 (d, 2 H, *J* = 8.5 Hz), 4.77 (dd, 1 H, *J* = 8.5 Hz, 5.0 Hz), 3.63 (dt, 1 H, *J* = 10.0 Hz, 7.5 Hz), 3.48 (dt, 1 H, *J* = 10.0 Hz, 6.0 Hz), 2.62 (s, 6 H), 2.36 (dq, 1 H, *J* = 13.0 Hz, 7.5 Hz), 2.01-1.94 (m, 2 H), 1.82 (td, 1 H, *J* = 12.0 Hz, 6.0 Hz)

**<sup>13</sup>C NMR** (CDCl<sub>3</sub>, 125 MHz) δ 143.1, 131.8, 128.4, 121.2, 63.4, 50.5, 37.9, 36.4, 24.9

**FT-IR** (ATR) 2972, 2884, 1487, 1333, 1145  $\text{cm}^{-1}$

**HRMS** ( $\text{EI}^+$ ) calcd for  $\text{C}_{12}\text{H}_{17}\text{N}_2\text{O}_2\text{SBr}$  [ $\text{M}$ ] $^+$  333.0272, found 333.0286

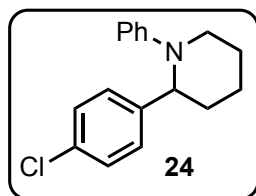

**2-(4-Chlorophenyl)-1-phenylpiperidine, 24** (51 mg, 63%) was prepared using the general procedure with *N*-(4-chlorobenzylidene)aniline (0.129 g, 0.600 mmol), 4-bromobutyl bis(catecholato)silicate (0.144 g, 0.300 mmol), and iridium photocatalyst (0.006 g, 0.002 mmol, 2 mol %) in DMSO (3 mL) for 30 min. Piperidine **24** was obtained as a colorless oil.

**$^1\text{H}$  NMR** ( $\text{CDCl}_3$ , 500 MHz)  $\delta$  7.21-7.13 (m, 6 H), 6.88 (d, 2 H,  $J$  = 8.0 Hz), 6.79 (t, 1 H,  $J$  = 7.5 Hz), 4.40 (dd, 1 H,  $J$  = 7.5 Hz, 4.0 Hz), 3.39 (dt, 1 H,  $J$  = 12.0 Hz, 5.5 Hz), 3.20-3.15 (m, 1 H), 2.00-1.94 (m, 1 H), 1.88-1.81 (m, 1 H), 1.80-1.75 (m, 2 H), 1.73-1.66 (m, 1 H), 1.58-1.51 (m, 1 H)

**$^{13}\text{C}$  NMR** ( $\text{CDCl}_3$ , 125 MHz)  $\delta$  152.0, 142.7, 132.0, 129.1, 128.9, 128.7, 120.6, 119.8, 61.2, 51.9, 34.3, 26.0, 22.6

**FT-IR** (ATR) 2935, 2856, 1597, 1490, 1241  $\text{cm}^{-1}$

**HRMS** ( $\text{EI}^+$ ) calcd for  $\text{C}_{17}\text{H}_{18}\text{NCl}$  [ $\text{M}$ ] $^+$  271.1128, found 271.1113

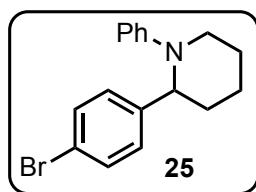

**2-(4-Bromophenyl)-1-phenylpiperidine, 25** (38 mg, 30%) was prepared using the general procedure with *N*-(4-bromobenzylidene)aniline (0.205 g, 0.789 mmol), 4-bromobutyl bis(catecholato)silicate (0.150 g, 0.394 mmol), and iridium photocatalyst (8 mg, 2 mol %) in DMSO (4 mL) for 30 min. Piperidine **25** was obtained as a colorless oil.

**$^1\text{H}$  NMR** (500 MHz,  $\text{CDCl}_3$ )  $\delta$  7.36-7.31 (m, 2 H), 7.18-7.12 (m, 4 H), 7.78 (d, 2 H,  $J$  = 7.5 Hz), 6.80 (t, 1 H,  $J$  = 7.5 Hz), 4.39 (dd, 1 H, 7.5 Hz, 4.0 Hz), 3.43-3.35 (m, 1 H), 3.22-3.13 (m, 1 H), 2.02-1.92 (m, 1 H), 1.89-1.80 (m, 1 H), 1.81-1.74 (m, 2 H), 1.74-1.65 (m, 1 H), 1.60-1.48 (m, 1 H).

**$^{13}\text{C}$  NMR** (125 MHz,  $\text{CDCl}_3$ )  $\delta$  151.9, 143.1, 131.5, 129.1, 129.0, 120.4, 120.0, 119.7, 61.2, 51.8, 34.1, 25.8, 22.5.

**FT-IR** (ATR) 2933 (m), 1596 (s), 1501 (vs), 1258 (s), 1239 (s), 1103 (s), 1072 (vs), 1028 (s), 1008 (vs), 817 (vs), 801 (s), 766 (vs), 747 (vs), 696 (vs)

**HRMS** ( $\text{EI}^+$ )  $m/z$  calcd for  $\text{C}_{17}\text{H}_{18}\text{BrN}$  [ $\text{M}$ ] $^+$  315.0623, found 315.01623

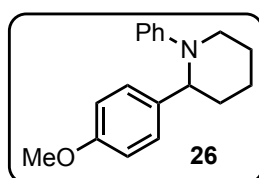

**2-(4-Methoxyphenyl)-1-phenylpiperidine, 26** (23 mg, 55%) was prepared using the general procedure with *N*-(4-methoxybenzylidene)aniline (0.083 g, 0.39 mmol), 4-bromobutyl bis(catecholato)silicate (0.075 g, 0.16 mmol), and iridium photocatalyst (4 mg, 2 mol %) in DMSO (2 mL) for 30 min. Piperidine **26** was obtained as a colorless oil.

**$^1\text{H}$  NMR** (500 MHz,  $\text{CDCl}_3$ )  $\delta$  7.22-7.10 (m, 4 H), 6.89 (d, 2 H,  $J$  = 8.0 Hz), 6.79-6.73 (m, 3 H), 4.46 (dd, 1 H,  $J$  = 7.0 Hz, 5.0 Hz), 3.75 (s, 3 H), 3.44-3.36 (m, 1 H), 3.28-3.21 (m, 1 H), 2.02-1.86 (m, 2 H), 1.79-1.63 (m, 3 H), 1.60-1.50 (m, 1 H)

**<sup>13</sup>C NMR** (125 MHz, CDCl<sub>3</sub>) δ 158.0, 152.0, 135.6, 128.9, 128.4, 119.7, 118.9, 113.7, 60.5, 55.3, 50.6, 33.6, 25.8, 22.2

**FT-IR** (ATR) 2932 (m), 1726 (w), 1597 (m), 1509 (s), 1244 (vs)

**HRMS** (EI<sup>+</sup>) *m/z* calcd for C<sub>18</sub>H<sub>21</sub>NO [M]<sup>+</sup> 267.1623, found 267.1620

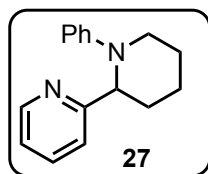

**2-(1-Phenylpiperidin-2-yl)pyridine, 27** (24 mg, 66%) was prepared using the general procedure with *N*-(pyridin-2-ylmethylene)aniline (0.071 g, 0.39 mmol), 4-bromobutyl bis(catecholato)silicate (0.075 g, 0.16 mmol), and iridium photocatalyst (4 mg, 2 mol %) in DMSO (2 mL) for 16 h. Piperidine **27** was obtained as a colorless oil.

**<sup>1</sup>H NMR** (500 MHz, CDCl<sub>3</sub>) δ 8.52 (d, 1 H, *J* = 5.0 Hz), 7.47 (td, 1 H, *J* = 7.5 Hz, 2.0 Hz), 7.19 (d, 1 H, *J* = 8.0 Hz), 7.17-7.11 (m, 2 H), 7.05-7.01 (m, 1 H), 6.91 (d, 2 H, *J* = 8.0 Hz), 6.76 (t, 1 H, *J* = 7.5 Hz), 4.63 (dd, 1 H, *J* = 7.0 Hz, 5.5 Hz), 3.46 (ddd, 1 H, *J* = 12.0 Hz, 7.5 Hz, 4.5 Hz), 3.27 (ddd, 1 H, *J* = 12.5 Hz, 7.5 Hz, 4.0 Hz), 2.14-2.01 (m, 2 H), 1.86-1.69 (m, 2 H), 1.68-1.52 (m, 2 H)

**<sup>13</sup>C NMR** (125 MHz, CDCl<sub>3</sub>) δ 163.3, 151.8, 149.2, 136.4, 129.0, 122.0, 121.4, 119.9, 118.7, 62.8, 50.9, 32.5, 25.9, 22.1

**FT-IR** (ATR) 2932 (m), 1589 (s), 1501 (s), 1432 (m), 1259 (w), 748 (vs)

**HRMS** (EI<sup>+</sup>) *m/z* calcd for C<sub>16</sub>H<sub>18</sub>N<sub>2</sub> [M]<sup>+</sup> 238.1470, found 238.1469

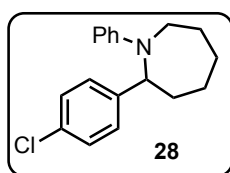

**2-(4-Chlorophenyl)-1-phenylazepane, 28** (21 mg, 24%) was prepared using the general procedure with *N*-(4-chlorobenzylidene)aniline (0.129 g, 0.600 mmol), 5-bromopentyl bis(catecholato)silicate (0.152 g, 0.300 mmol), and iridium photocatalyst (0.006 g, 0.002 mmol, 2 mol %) in DMSO (3 mL) for 16 h. Azepane **28** was obtained as a colorless oil. The linear byproduct (silicate addition to imine, but no cyclization onto the alkyl halide) was also obtained in 51% yield.

**<sup>1</sup>H NMR** (CDCl<sub>3</sub>, 500 MHz) δ 7.27-7.25 (m, 2 H), 7.17-7.12 (m, 4 H), 6.63 (t, 1 H, *J* = 7.0 Hz), 6.59 (d, 2 H, *J* = 8.0 Hz), 4.57 (dd, 1 H, *J* = 12.0 Hz, 6.0 Hz), 3.83 (d, 1 H, *J* = 16.0 Hz), 3.49 (ddd, 1 H, *J* = 16.0 Hz, 10.5 Hz, 2.0 Hz), 2.43 (ddd, 1 H, *J* = 14.5 Hz, 8.0 Hz, 6.0 Hz), 1.95-1.87 (m, 2 H), 1.82-1.69 (m, 3 H), 1.50-1.43 (m, 1 H), 1.39-1.31 (m, 1 H)

**<sup>13</sup>C NMR** (CDCl<sub>3</sub>, 125 MHz) δ 149.1, 143.0, 132.4, 129.5, 129.1, 127.5, 116.0, 111.6, 62.7, 45.5, 38.9, 29.9, 28.6, 26.8

**FT-IR** (ATR) 2926, 2855, 1597, 1504, 1384 cm<sup>-1</sup>

**HRMS** (EI<sup>+</sup>) calcd for C<sub>18</sub>H<sub>20</sub>NCl [M]<sup>+</sup> 285.1284, found 285.1287

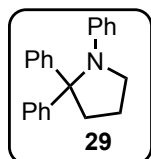

**1,2,2-Triphenylpyrrolidine, 29** (41 mg, 45%) was prepared using the general procedure with *N*-(diphenylmethylene)aniline (0.156 g, 0.600 mmol), 3-bromopropyl bis(catecholato)silicate (0.140 g, 0.300 mmol), and iridium photocatalyst (6 mg, 0.006 mmol, 2 mol %) in DMSO (3 mL) for 16 h. Pyrrolidine **29** was obtained as a colorless oil.

**<sup>1</sup>H NMR** (CDCl<sub>3</sub>, 500 MHz) δ 7.40 (d, 4 H, *J* = 7.5 Hz), 7.30 (t, 4 H, *J* = 7.5 Hz), 7.24 (dd, 2 H, *J* = 13.0 Hz, 6.0 Hz), 6.95 (t, 2 H, *J* = 7.5 Hz), 6.53 (t, 1 H, *J* = 7.0 Hz), 6.36 (d, 2 H, *J* = 8.0 Hz), 3.82 (t, 2 H, *J* = 6.5 Hz), 2.70 (t, 2 H, *J* = 6.5 Hz), 1.90-1.87 (m, 2 H)



**<sup>13</sup>C NMR** (CDCl<sub>3</sub>, 125 MHz) δ 146.2, 143.6, 129.0, 128.3, 128.1, 126.9, 115.7, 114.4, 74.6, 50.8, 50.7, 23.1

**FT-IR** (ATR) 3058, 2978, 1597, 1504, 1343 cm<sup>-1</sup>

**HRMS** (EI<sup>+</sup>) calcd for C<sub>22</sub>H<sub>21</sub>N [M]<sup>+</sup> 299.1674, found 299.1687

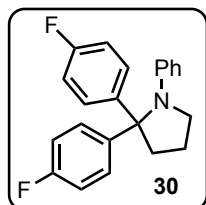

**2,2-Bis(4-fluorophenyl)-1-phenylpyrrolidine, 30** (55 mg, 55%) was prepared using the general procedure with *N*-(bis(4-fluorophenyl)methylene) (0.175 g, 0.600 mmol), 3-bromopropyl bis(catecholato)silicate (0.140 g, 0.300 mmol), and iridium photocatalyst (6 mg, 0.006 mmol, 2 mol %) in DMSO (3 mL) for 16 h. Pyrrolidine **30** was obtained as a colorless oil.

**<sup>1</sup>H NMR** (CDCl<sub>3</sub>, 500 MHz) δ 7.30 (dd, 4 H, *J* = 8.0 Hz, 5.5 Hz), 6.98-6.96 (m, 6 H), 6.54 (t, 1 H, *J* = 7.0 Hz), 6.30 (d, 2 H, *J* = 8.0 Hz), 3.78 (t, 2 H, *J* = 6.4 Hz), 2.62 (t, 2 H, *J* = 6.5 Hz), 1.89-1.84 (m, 2 H)

**<sup>13</sup>C NMR** (CDCl<sub>3</sub>, 125 MHz) δ 161.8 (d, <sup>1</sup>*J*<sub>CF</sub> = 246.0 Hz), 145.8, 139.1 (d, <sup>3</sup>*J*<sub>CF</sub> = 3.0 Hz), 130.5 (d, <sup>3</sup>*J*<sub>CF</sub> = 7.8 Hz), 128.5, 116.2, 115.0 (d, <sup>2</sup>*J*<sub>CF</sub> = 21.1 Hz), 114.5, 73.8, 50.7, 22.9

**<sup>19</sup>F NMR** (CDCl<sub>3</sub>, 476 MHz) δ -116.2 (s, 2 F)

**FT-IR** (ATR) 2978, 2833, 1597, 1504, 1342, 1225, 1160 cm<sup>-1</sup>

**HRMS** (EI<sup>+</sup>) calcd for C<sub>22</sub>H<sub>19</sub>NF<sub>2</sub> [M]<sup>+</sup> 335.1486, found 335.1492

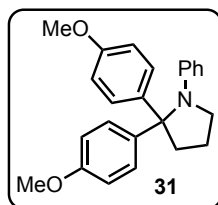

**2,2-Bis(4-methoxyphenyl)-1-phenylpyrrolidine, 31** (70 mg, 65%) was prepared using the general procedure with *N*-(bis(4-methoxyphenyl)methylene)aniline (0.189 g, 0.600 mmol), 3-bromopropyl bis(catecholato)silicate (0.140 g, 0.300 mmol), and iridium photocatalyst (6 mg, 0.006 mmol, 2 mol %) in DMSO (3 mL) for 16 h. Pyrrolidine **31** was obtained as a yellow oil.

**<sup>1</sup>H NMR** (CDCl<sub>3</sub>, 500 MHz) δ 7.30 (d, 4 H, *J* = 8.5 Hz), 6.98 (t, 2 H, *J* = 8.0 Hz), 6.84 (d, 4 H, *J* = 8.5 Hz), 6.54 (t, 1 H, *J* = 7.0 Hz), 6.38 (d, 2 H, *J* = 8.0 Hz), 3.81 (s, 6 H), 3.79 (t, 2 H, *J* = 6.5 Hz), 2.63 (t, 2 H, *J* = 6.5 Hz), 1.91-1.86 (m, 2 H)

**<sup>13</sup>C NMR** (CDCl<sub>3</sub>, 125 MHz) δ 158.3, 146.2, 135.7, 130.0, 128.3, 115.5, 114.4, 113.4, 73.6, 55.4, 50.6, 50.4, 22.9

**FT-IR** (ATR) 2951, 2834, 1596, 1502, 1342, 1246, 1175 cm<sup>-1</sup>

**HRMS** (EI<sup>+</sup>) calcd for C<sub>24</sub>H<sub>26</sub>NO<sub>2</sub> [M+H]<sup>+</sup> 360.1964, found 360.1959

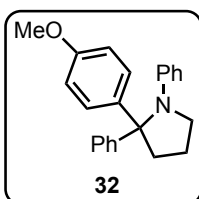

**2-(4-Methoxyphenyl)-1,2-diphenylpyrrolidine, 32** (65 mg, 66%) was prepared using the general procedure with *N*-((4-methoxyphenyl)(phenyl)methylene) (0.171 g, 0.600 mmol), 3-bromopropyl bis(catecholato)silicate (0.140 g, 0.300 mmol), and iridium photocatalyst (6 mg, 0.006 mmol, 2 mol %) in DMSO (3 mL) for 16 h. Pyrrolidine **32** was obtained as a yellow oil.

**<sup>1</sup>H NMR** (CDCl<sub>3</sub>, 500 MHz) δ 7.37 (d, 2 H, *J* = 7.5 Hz), 7.30-7.27 (m, 4 H), 7.22 (t, 1 H, *J* = 7.0 Hz), 6.95 (t, 2 H, *J* = 8.0 Hz), 6.82 (d, 2 H, *J* = 9.0 Hz), 6.52 (t, 1 H, *J* = 7.0 Hz), 6.35 (d, 2 H, *J* = 8.0 Hz), 3.80-3.77 (m, 5 H), 2.66-2.64 (t, 2 H, *J* = 6.5 Hz), 1.89-1.84 (m, 2 H)

$^{13}\text{C}$  NMR (CDCl<sub>3</sub>, 125 MHz)  $\delta$  158.4, 146.2, 143.9, 135.5, 130.1, 128.9, 128.3, 128.1, 126.8, 115.6, 114.4, 113.4, 74.1, 55.5, 50.7, 50.5, 23.0

FT-IR (ATR) 2951, 2835, 1597, 1503, 1343, 1251, 1178 cm<sup>-1</sup>

HRMS (EI<sup>+</sup>) calcd for C<sub>23</sub>H<sub>24</sub>NO [M+H]<sup>+</sup> 330.1858, found 330.1865

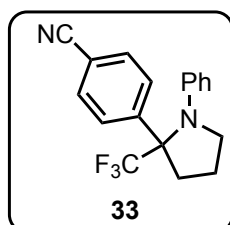

**4-(1-Phenyl-2-(trifluoromethyl)pyrrolidin-2-yl)benzonitrile, 33** (35 mg, 37%) was prepared using the general procedure with 4-(2,2,2-trifluoro-1-(phenylimino)ethyl)benzonitrile (0.164 g, 0.600 mmol), 3-bromopropyl bis(catecholato)silicate (0.140 g, 0.300 mmol), and iridium photocatalyst (6 mg, 0.006 mmol, 2 mol %) in DMSO (3 mL) for 16 h. Pyrrolidine **33** was obtained as a colorless oil.

$^1\text{H}$  NMR (CDCl<sub>3</sub>, 500 MHz)  $\delta$  7.66 (d, 2 H,  $J$  = 8.5 Hz), 7.56 (d, 2 H,  $J$  = 8.5 Hz), 7.08 (dd, 2 H,  $J$  = 8.5, 7.5 Hz), 6.74 (t, 1 H,  $J$  = 7.5 Hz), 6.49 (d, 2 H,  $J$  = 8.5 Hz), 3.80-3.77 (m, 2 H), 2.85-2.79 (m, 1 H), 2.18-2.10 (m, 2 H), 2.07-2.00 (m, 1 H)

$^{13}\text{C}$  NMR (CDCl<sub>3</sub>, 125 MHz)  $\delta$  145.2, 144.3, 132.9, 128.7, 127.6 (q,  $^1J_{\text{CF}}$  = 291 Hz), 127.4 (q,  $^3J_{\text{CF}}$  = 3 Hz), 118.7, 115.8 (d,  $^4J_{\text{CF}}$  = 2 Hz), 112.1, 73.0 (q,  $^2J_{\text{CF}}$  = 27 Hz), 52.2, 42.6, 22.2

$^{19}\text{F}$  NMR (CDCl<sub>3</sub>, 476 MHz)  $\delta$  -64.8 (s, 3 F)

FT-IR (ATR) 2981, 2855, 2230, 1599, 1504, 1325, 1146 cm<sup>-1</sup>

HRMS (EI<sup>+</sup>) calcd for C<sub>18</sub>H<sub>15</sub>N<sub>2</sub>F<sub>3</sub> [M]<sup>+</sup> 316.1187, found 316.1199

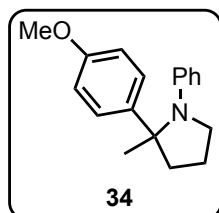

**2-(4-Methoxyphenyl)-2-methyl-1-phenylpyrrolidine, 34** (20 mg, 25%) was prepared using the general procedure with *N*-(1-(4-methoxyphenyl)ethylidene)aniline (0.134 g, 0.600 mmol), 3-bromopropyl bis(catecholato)silicate (0.140 g, 0.300 mmol), and iridium photocatalyst (6 mg, 0.006 mmol, 2 mol %) in DMSO (3 mL) for 16 h. Pyrrolidine **34** was obtained as a yellow oil.

$^1\text{H}$  NMR (CDCl<sub>3</sub>, 500 MHz)  $\delta$  7.21 (d, 2 H,  $J$  = 8.5 Hz), 7.07 (t, 2 H,  $J$  = 8.0 Hz), 6.83 (d, 2 H,  $J$  = 8.5 Hz), 6.58 (t, 1 H,  $J$  = 7.0 Hz), 6.43 (d, 2 H,  $J$  = 8.5 Hz), 3.79 (s, 3 H), 3.65-3.56 (m, 2 H), 2.16-2.11 (m, 1 H), 2.09-2.04 (m, 1 H), 1.96-1.91 (m, 2 H), 1.76 (s, 3 H)

$^{13}\text{C}$  NMR (CDCl<sub>3</sub>, 125 MHz)  $\delta$  158.2, 146.0, 140.0, 128.7, 127.1, 115.6, 114.5, 113.9, 65.6, 55.5, 50.5, 47.5, 24.0, 22.4

FT-IR (ATR) 2965, 2833, 1597, 1504, 1344 cm<sup>-1</sup>

HRMS (EI<sup>+</sup>) calcd for C<sub>18</sub>H<sub>22</sub>NO [M+H]<sup>+</sup> 268.1701, found 268.1702

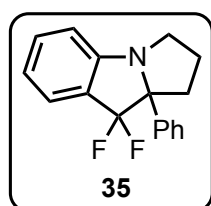

**9,9-Difluoro-9a-phenyl-2,3,9,9a-tetrahydro-1H-pyrrolo[1,2-a]indole, 35** (35 mg, 43%) was prepared using the general procedure with 3,3-difluoro-2-phenyl-3H-indole (0.138 g, 0.600 mmol), 3-bromopropyl bis(catecholato)silicate (0.140 g, 0.300 mmol), and iridium photocatalyst (6 mg, 0.006 mmol, 2 mol %) in DMSO (3 mL) for 16 h. Pyrrolidine **35** was obtained as a colorless oil.

**<sup>1</sup>H NMR** (CDCl<sub>3</sub>, 500 MHz) δ 7.61 (d, 2 H, *J* = 7.5 Hz), 7.42 (d, 2 H, *J* = 7.0 Hz), 7.40 (d, 2 H, *J* = 7.5 Hz), 7.34 (t, 1 H, *J* = 7.0 Hz), 6.94 (t, 1 H, *J* = 7.5 Hz), 6.83 (d, 1 H, *J* = 8.0 Hz), 3.56 (t, 1 H, *J* = 9.5 Hz), 3.39-3.34 (m, 1 H), 2.28 (dd, 1 H, *J* = 12.0, 6.5 Hz), 2.13-2.02 (m, 2 H), 1.78-1.68 (m, 1 H)

**<sup>13</sup>C NMR** (CDCl<sub>3</sub>, 125 MHz) δ 155.1 (dd, <sup>3</sup>*J*<sub>CF</sub> = 9 Hz, 5 Hz), 138.4 (d, <sup>3</sup>*J*<sub>CF</sub> = 6 Hz), 133.2, 128.5, 128.0, 126.9, 126.1 (dd, <sup>1</sup>*J*<sub>CF</sub> = 250 Hz, 244 Hz), 124.6, 122.5 (dd, *J*<sub>CF</sub> = 28 Hz, 25 Hz), 120.7, 112.6, 82.3 (dd, <sup>2</sup>*J*<sub>CF</sub> = 27 Hz, 22 Hz), 51.6 (d, <sup>4</sup>*J*<sub>CF</sub> = 3 Hz), 33.9 (dd, <sup>3</sup>*J*<sub>CF</sub> = 8 Hz, 2 Hz), 26.4

**<sup>19</sup>F NMR** (CDCl<sub>3</sub>, 476 MHz) δ -83.3 (d, 1 F, <sup>2</sup>*J*<sub>FF</sub> = 257 Hz), -96.6 (d, 1 F, <sup>2</sup>*J*<sub>FF</sub> = 257 Hz)

**FT-IR** (ATR) 2954, 2887, 1617, 1469, 1307, 1257 cm<sup>-1</sup>

**HRMS** (EI<sup>+</sup>) calcd for C<sub>17</sub>H<sub>15</sub>NF<sub>2</sub> [M]<sup>+</sup> 271.1173, found 271.1181

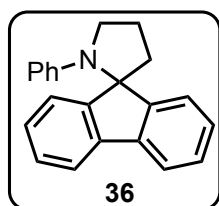

**1'-Phenylspiro[fluorene-9,2'-pyrrolidine], 36** (18 mg, 20%) was prepared using the general procedure with *N*-(9H-fluorene-9-ylidene)aniline (0.154 g, 0.600 mmol), 3-bromopropyl bis(catecholato)silicate (0.140 g, 0.300 mmol), and iridium photocatalyst (6 mg, 0.006 mmol, 2 mol %) in DMSO (3 mL) for 16 h. Pyrrolidine **36** was obtained as a yellow oil.

**<sup>1</sup>H NMR** (CDCl<sub>3</sub>, 500 MHz) δ 7.76 (d, 2 H, *J* = 7.5 Hz), 7.35 (t, 2 H, *J* = 7.5 Hz), 7.29 (d, 2 H, *J* = 7.5 Hz), 7.21 (t, 2 H, *J* = 7.5 Hz), 6.86 (t, 2 H, *J* = 8.0 Hz), 6.45 (t, 1 H, *J* = 7.0 Hz), 6.02 (d, 2 H, *J* = 8.5 Hz), 3.95 (t, 2 H, *J* = 6.5 Hz), 2.41-2.31 (m, 4 H)

**<sup>13</sup>C NMR** (CDCl<sub>3</sub>, 125 MHz) δ 150.2, 145.7, 139.1, 128.7, 128.2, 128.1, 123.4, 120.5, 116.1, 113.3, 74.3, 51.2, 44.2, 23.7

**FT-IR** (ATR) 2966, 2860, 1597, 1504, 1342 cm<sup>-1</sup>

**HRMS** (EI<sup>+</sup>) calcd for C<sub>22</sub>H<sub>19</sub>N [M]<sup>+</sup> 297.1517, found 297.1509

No product isolated from reactions with the following starting materials:

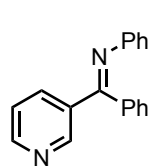

30% (a)

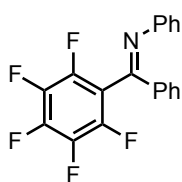

13% (a)

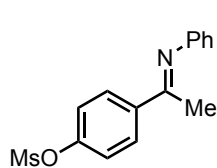

15% (a)

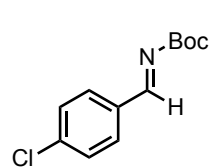

(b)

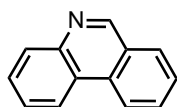

(b)

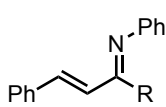

R = H or Ph

(b)

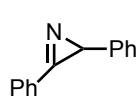

(b)

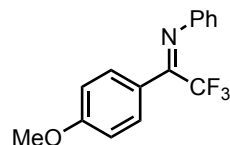

(b)

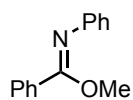

(b)

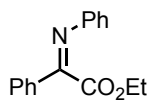

(b)

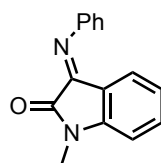

(c)

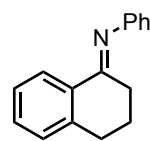

(c)

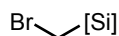

(c)

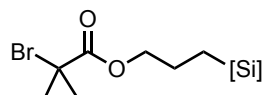

(c)

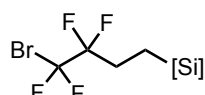

(d)

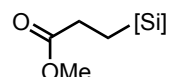

(c,d)

(a) Product inseparable from imine starting material, yield obtained by  $^1\text{H}$  NMR of the purified product/reagent mix;

(b) Reaction does not occur; (c) Traces of product found; (d) Linear intermediate byproduct observed as major product

# NMR Spectra of Synthesized Compounds

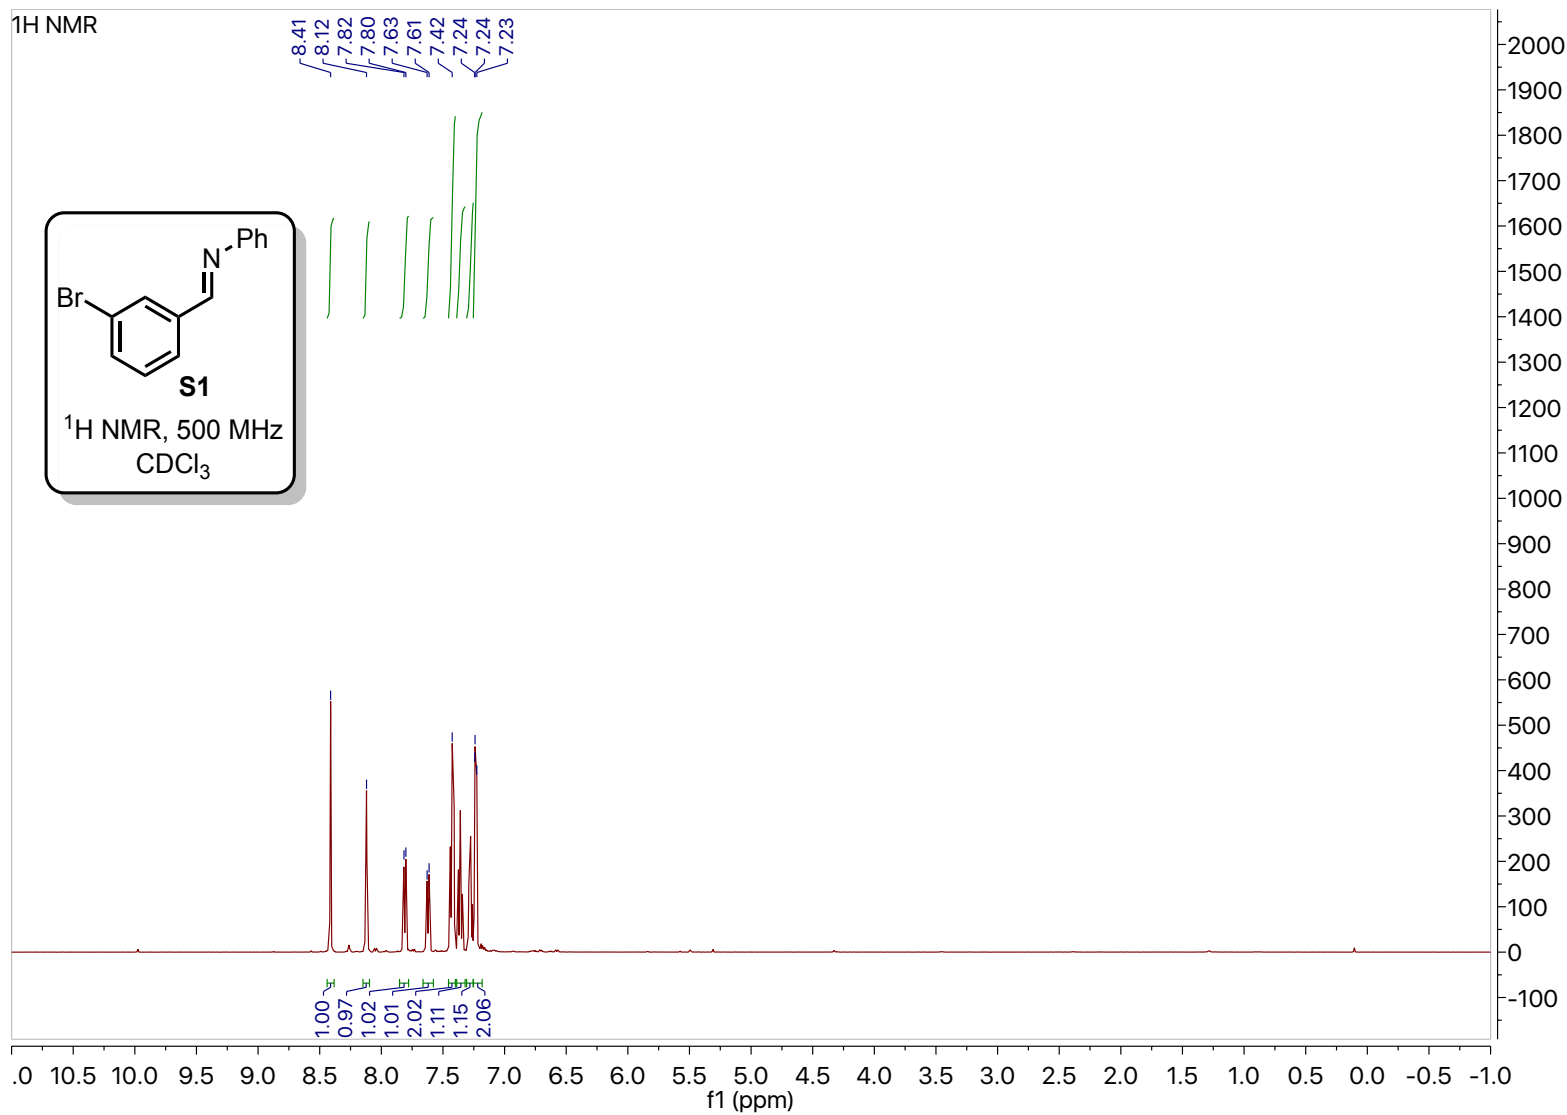

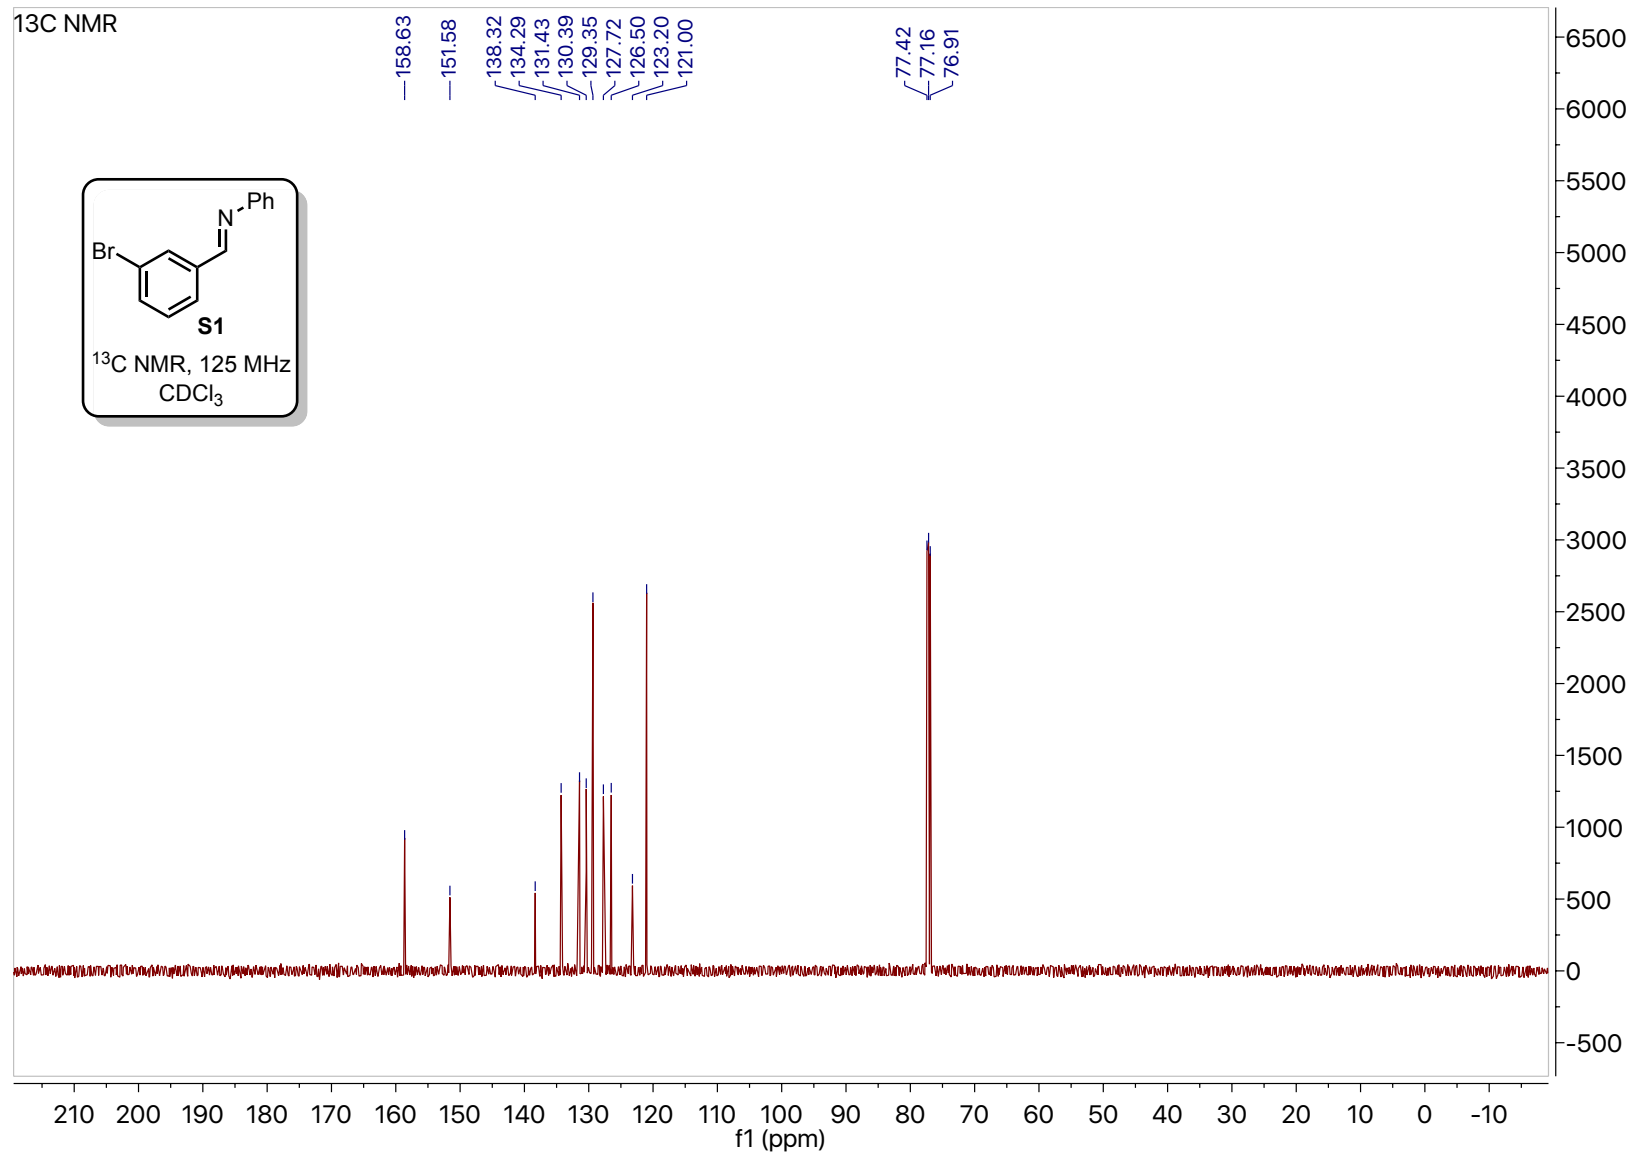

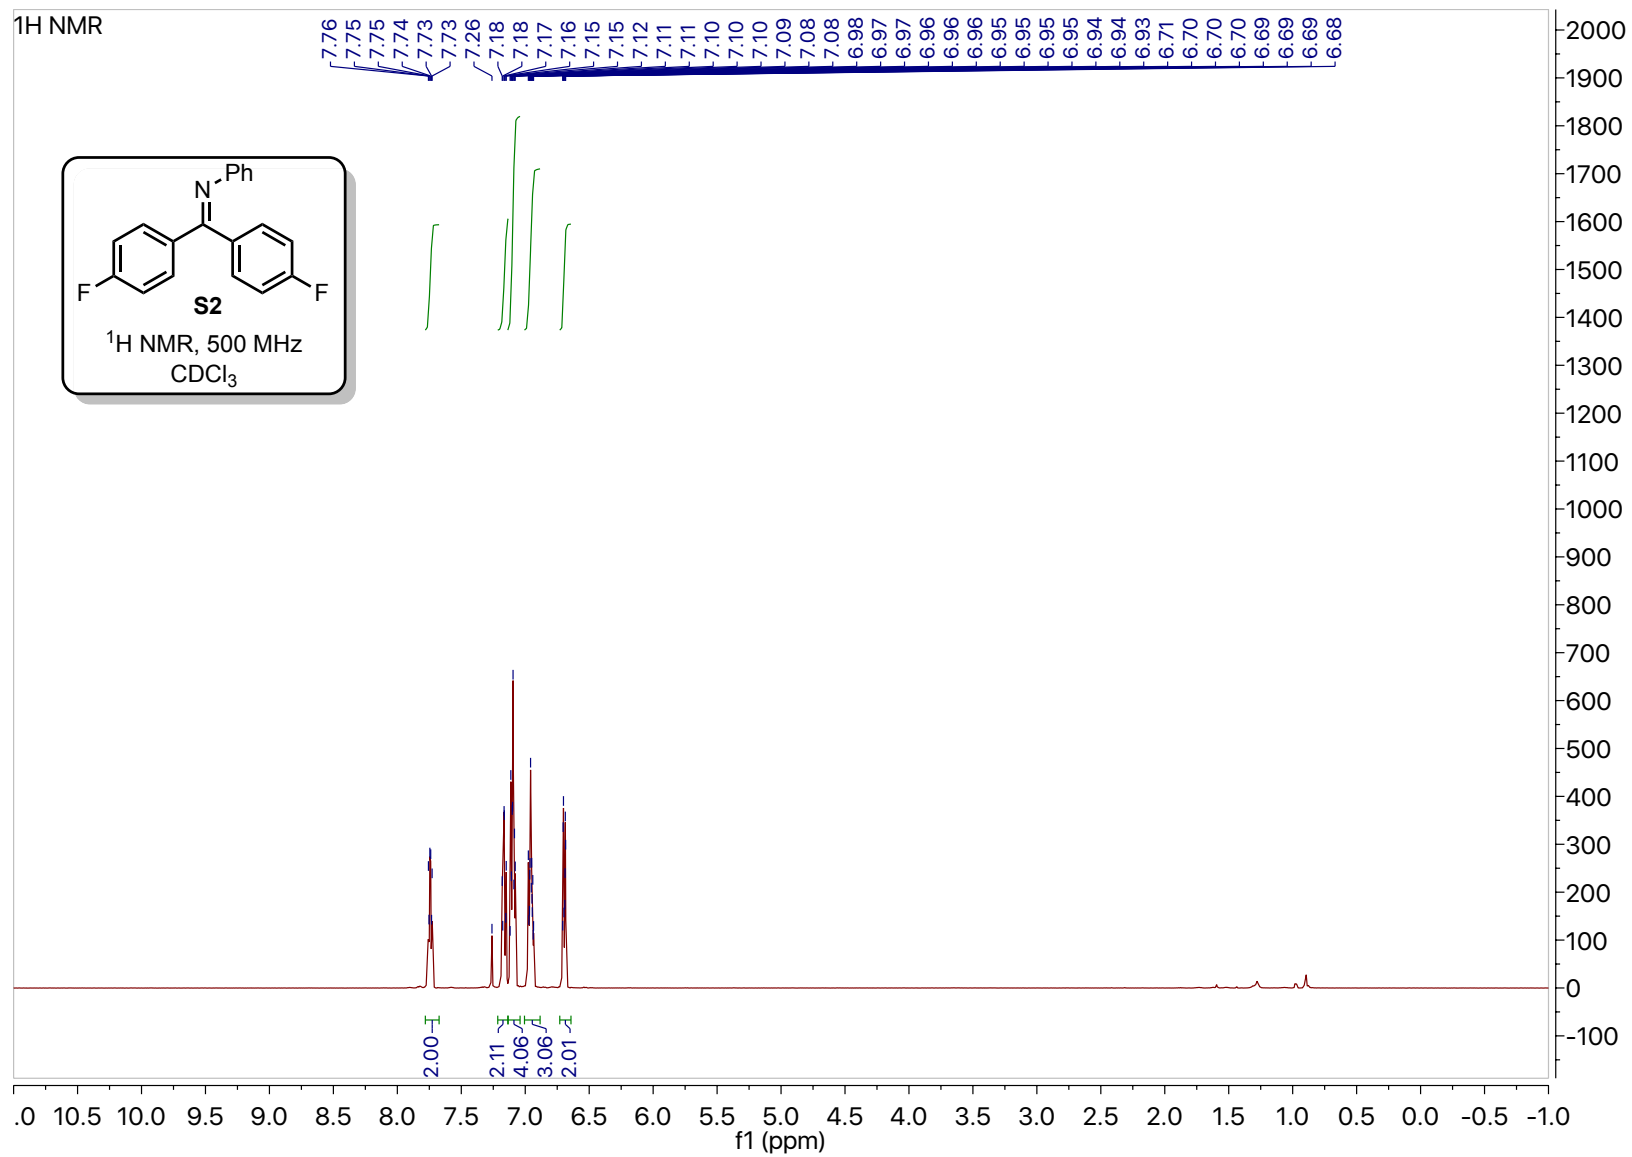

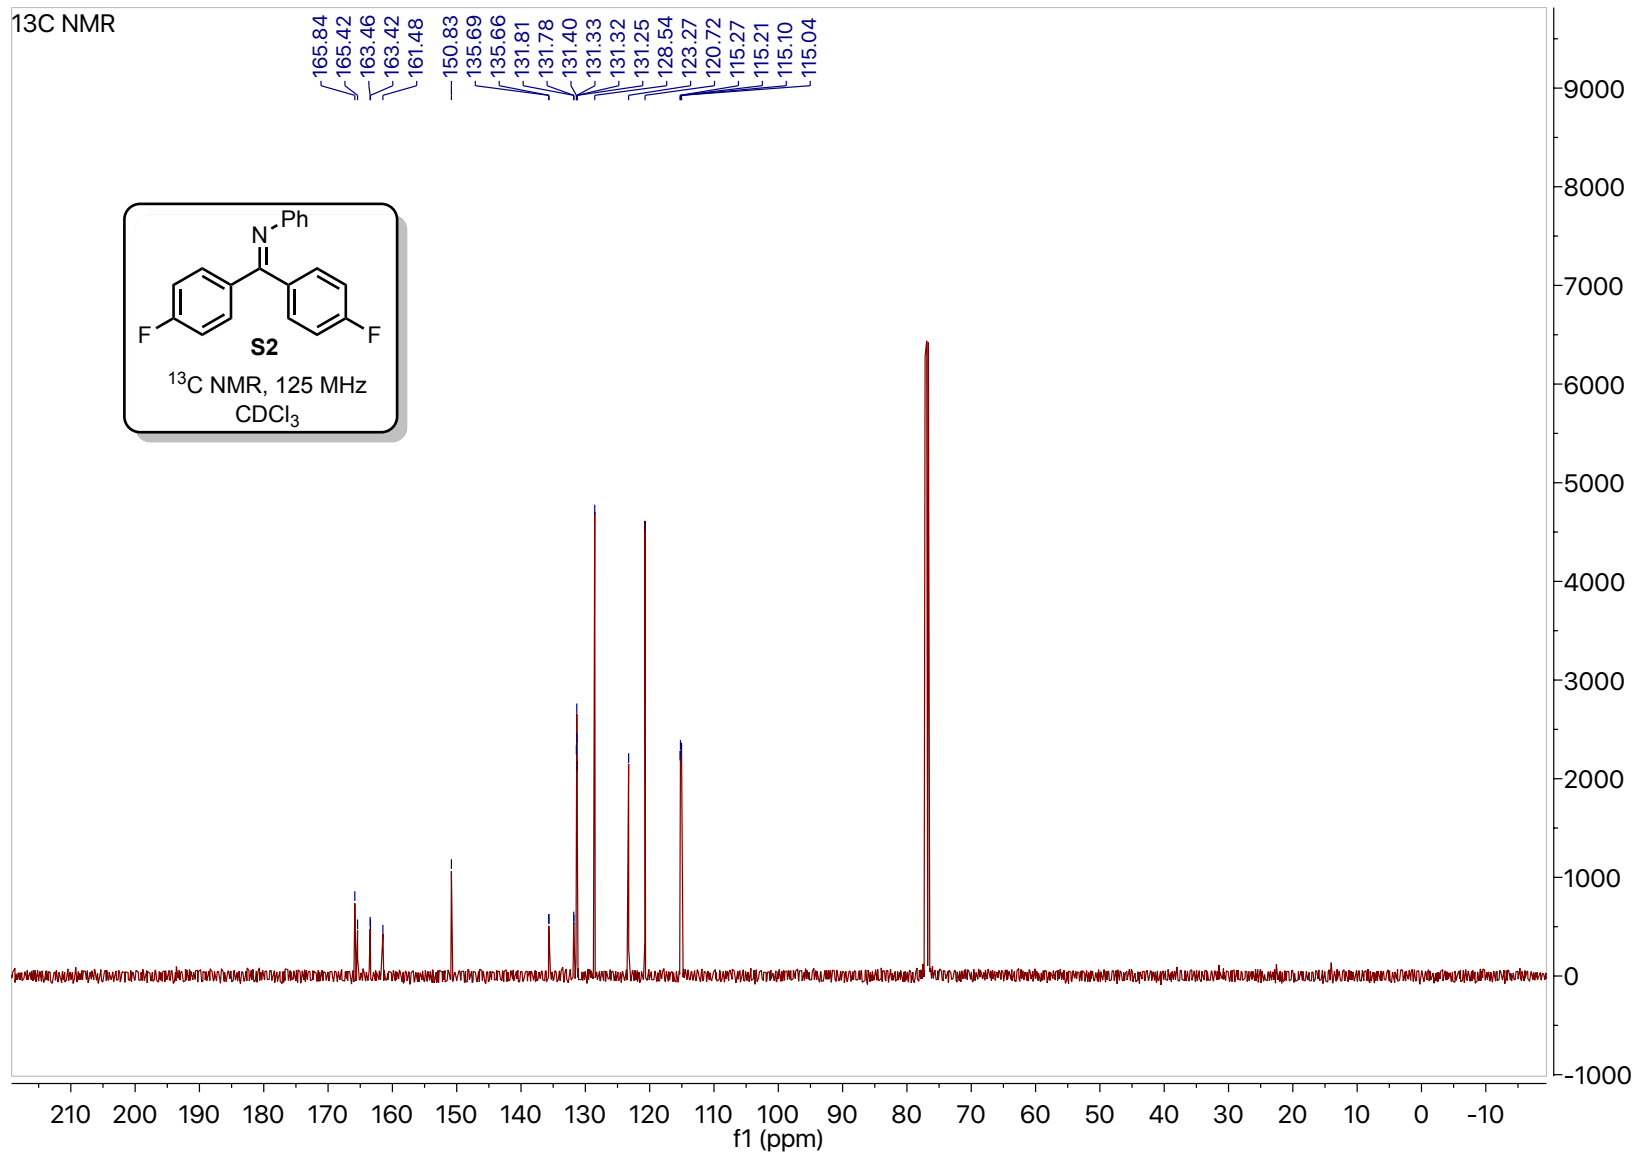



F19 NMR

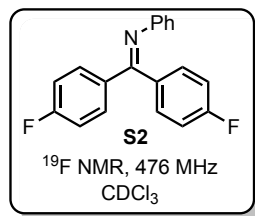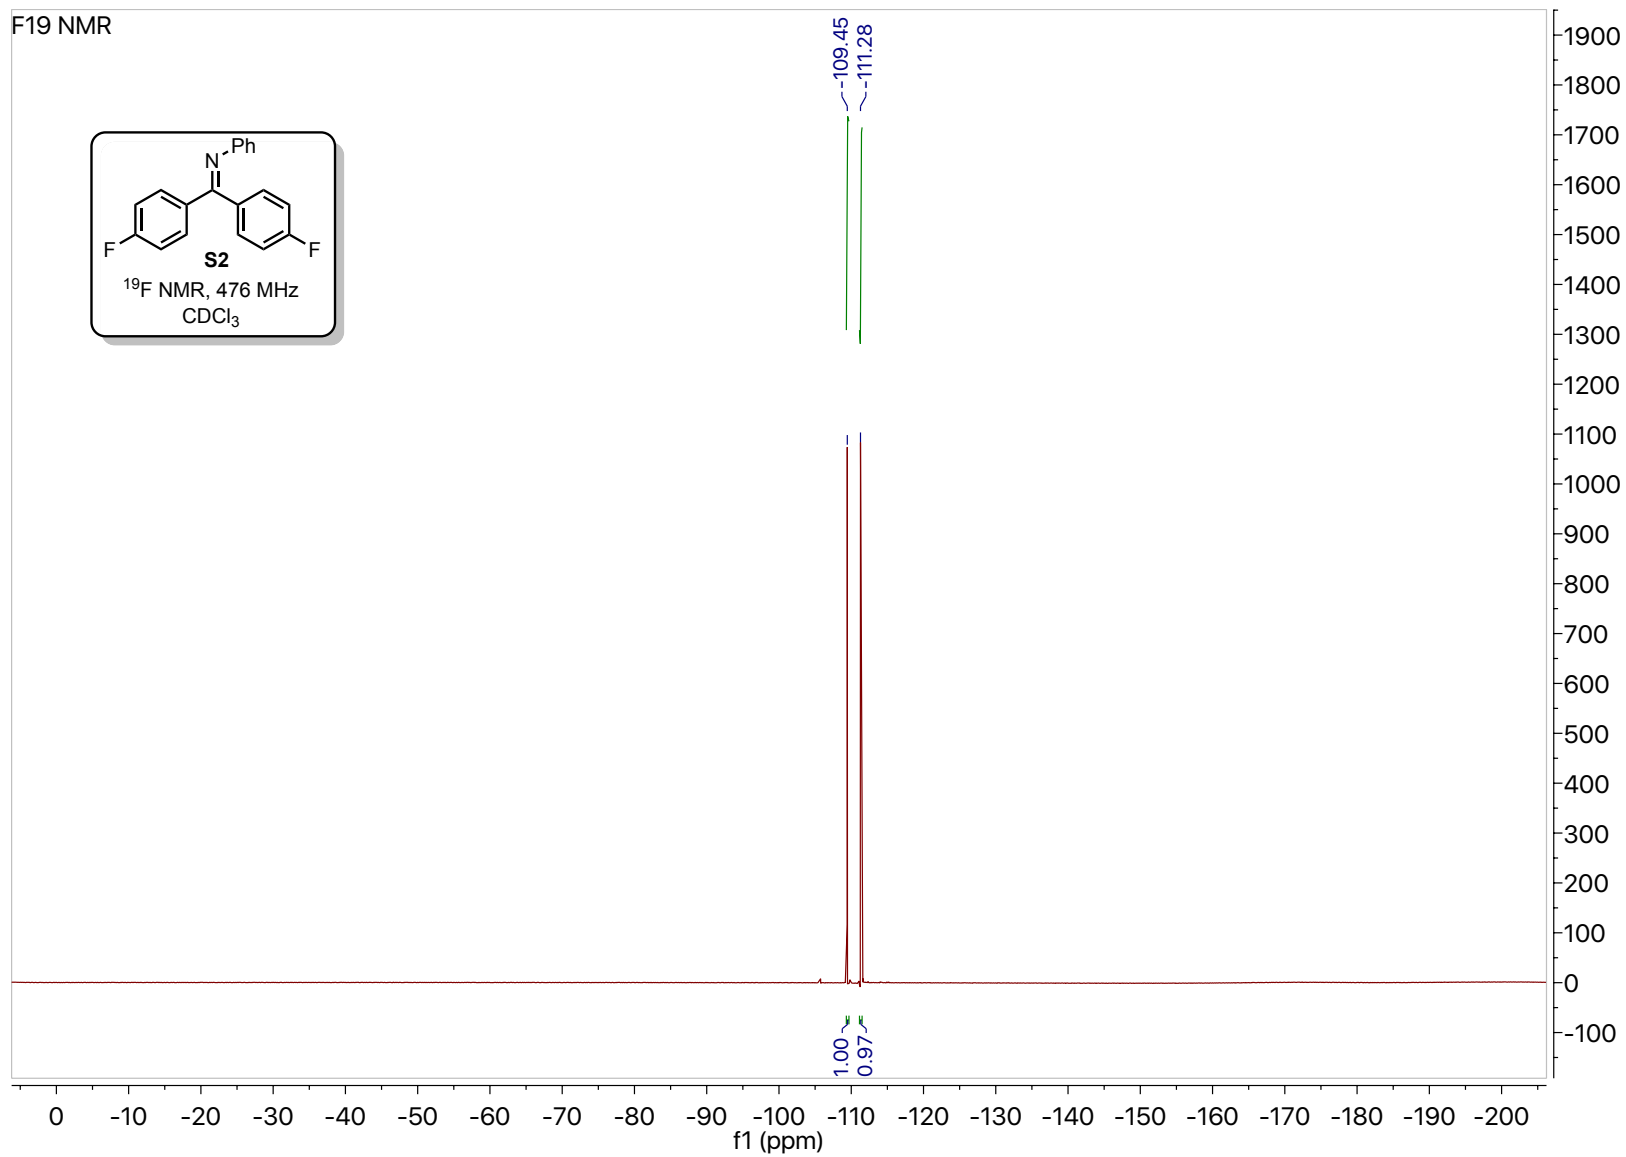

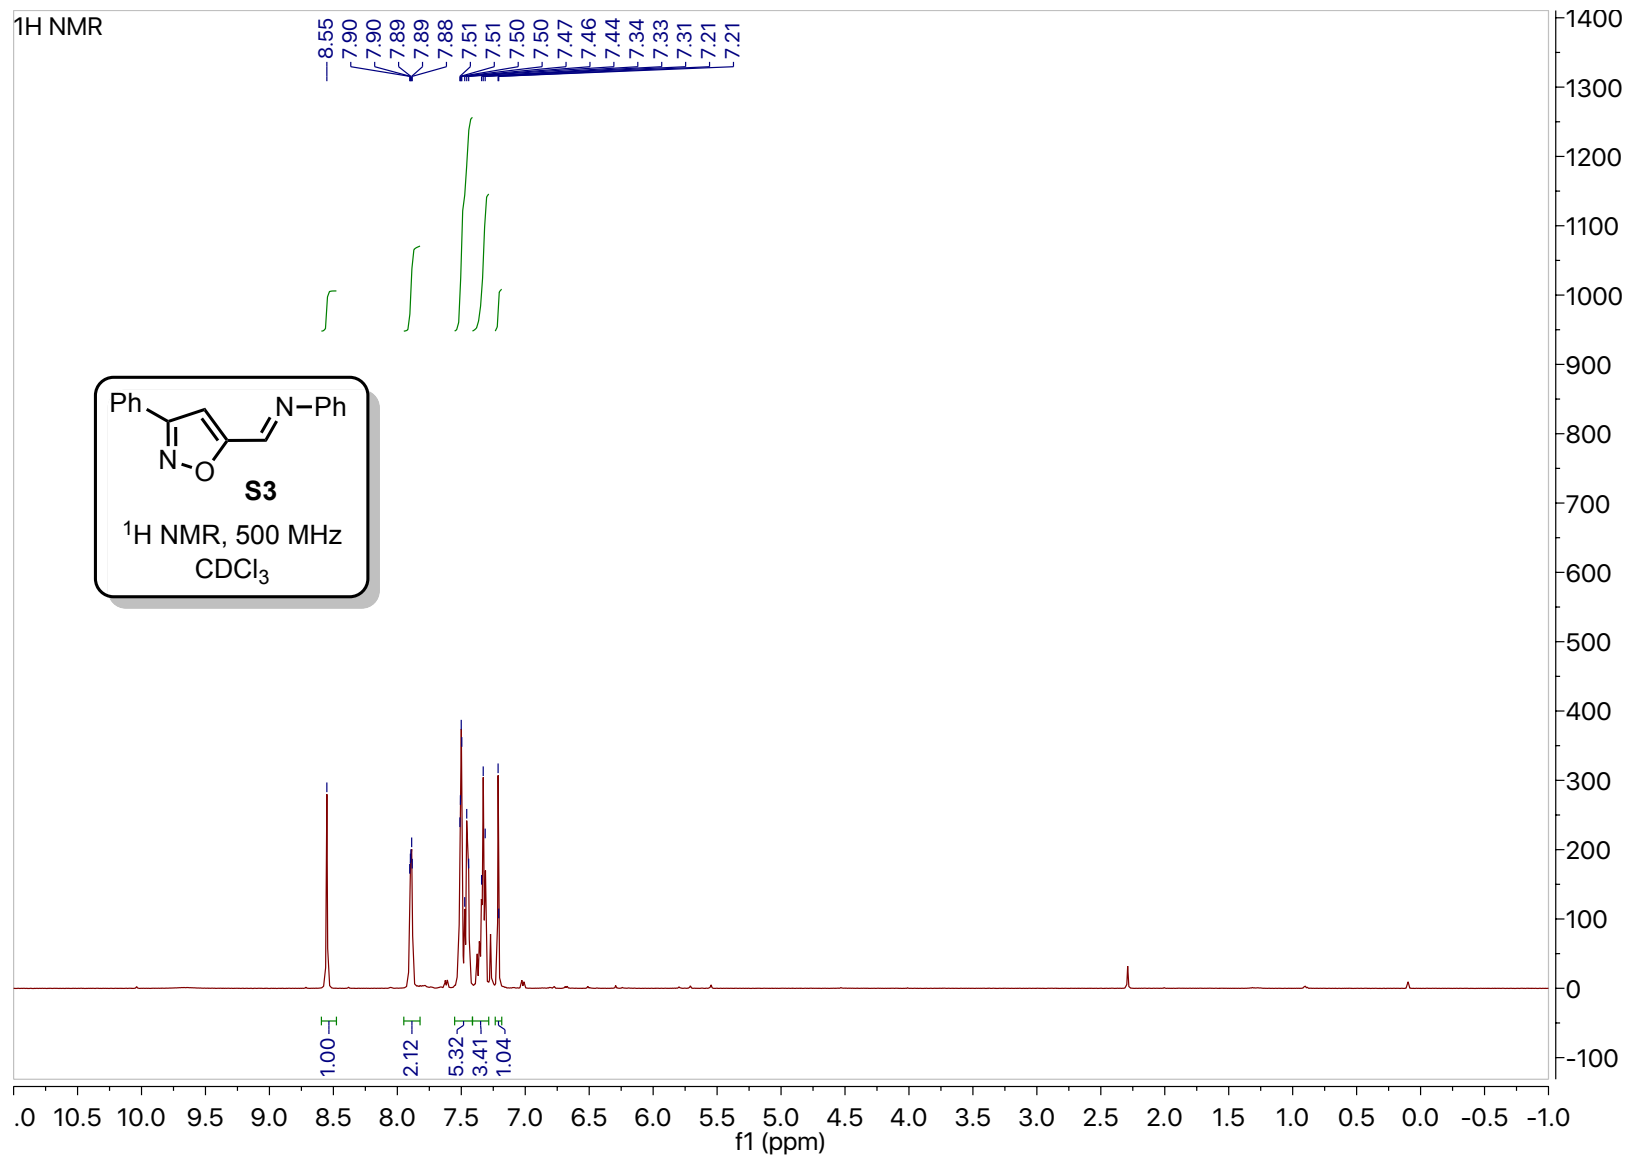

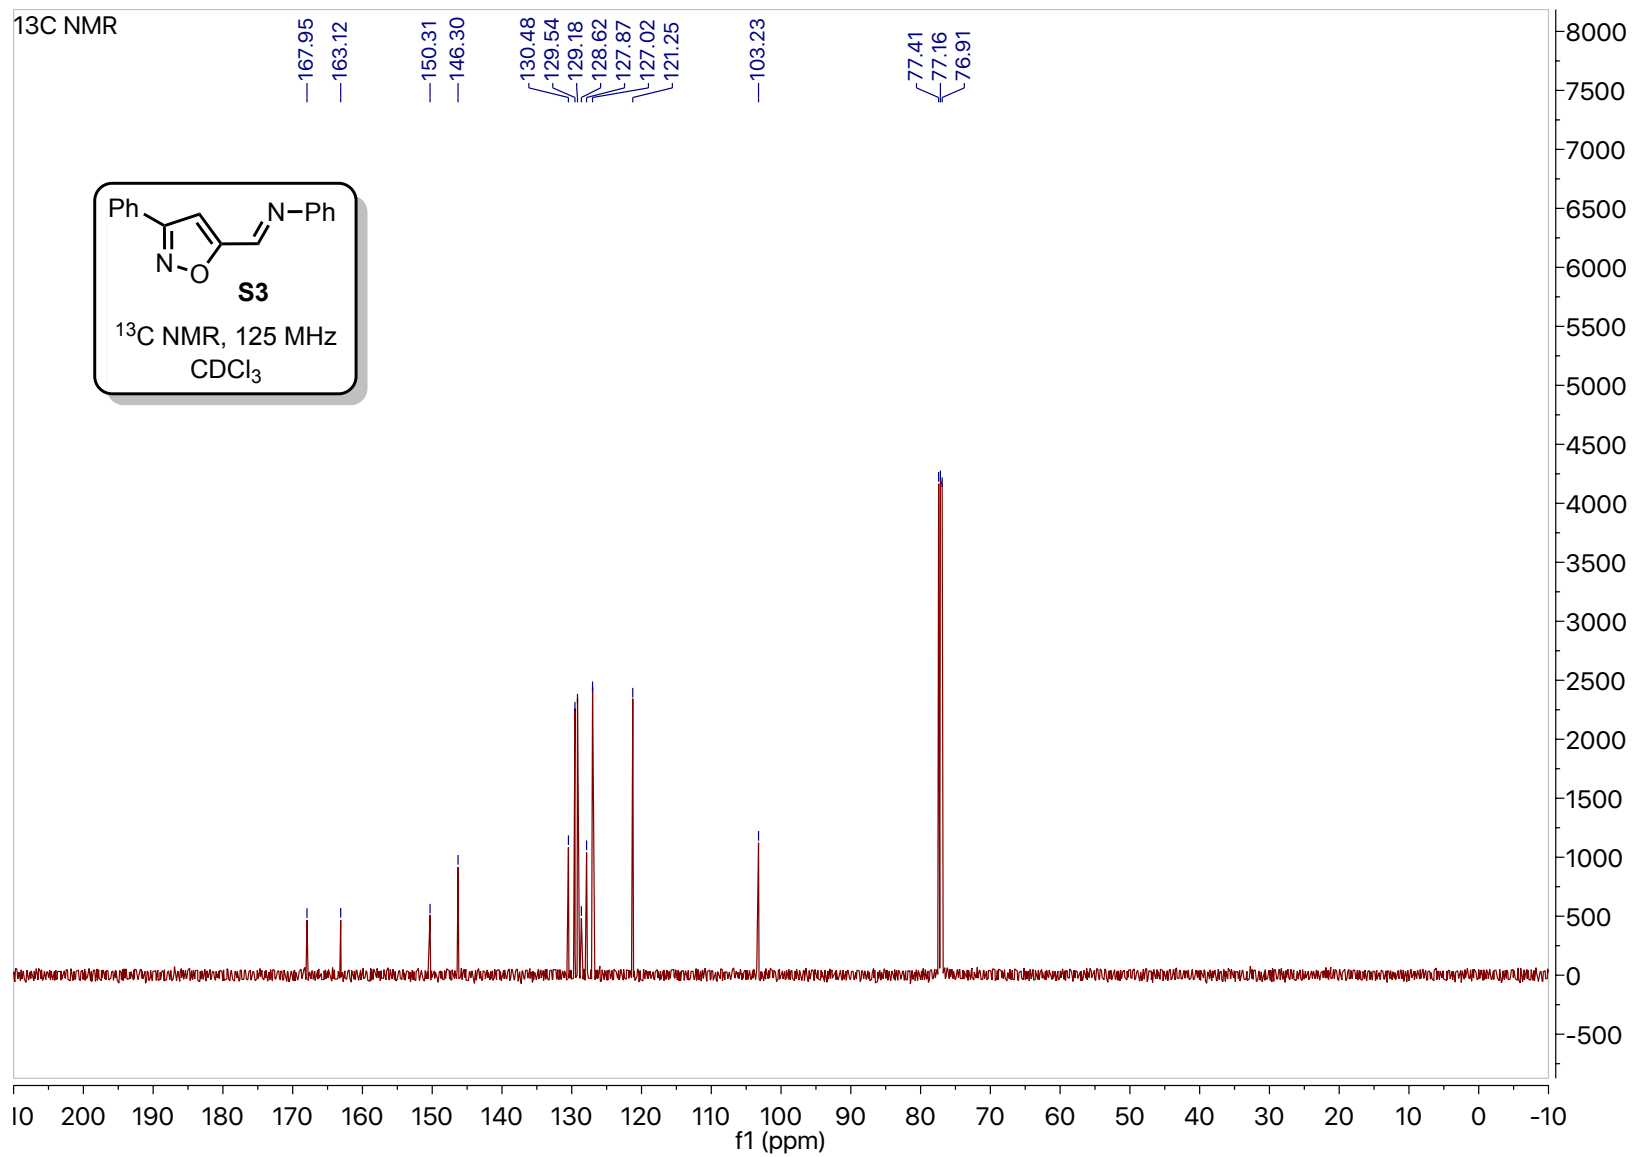

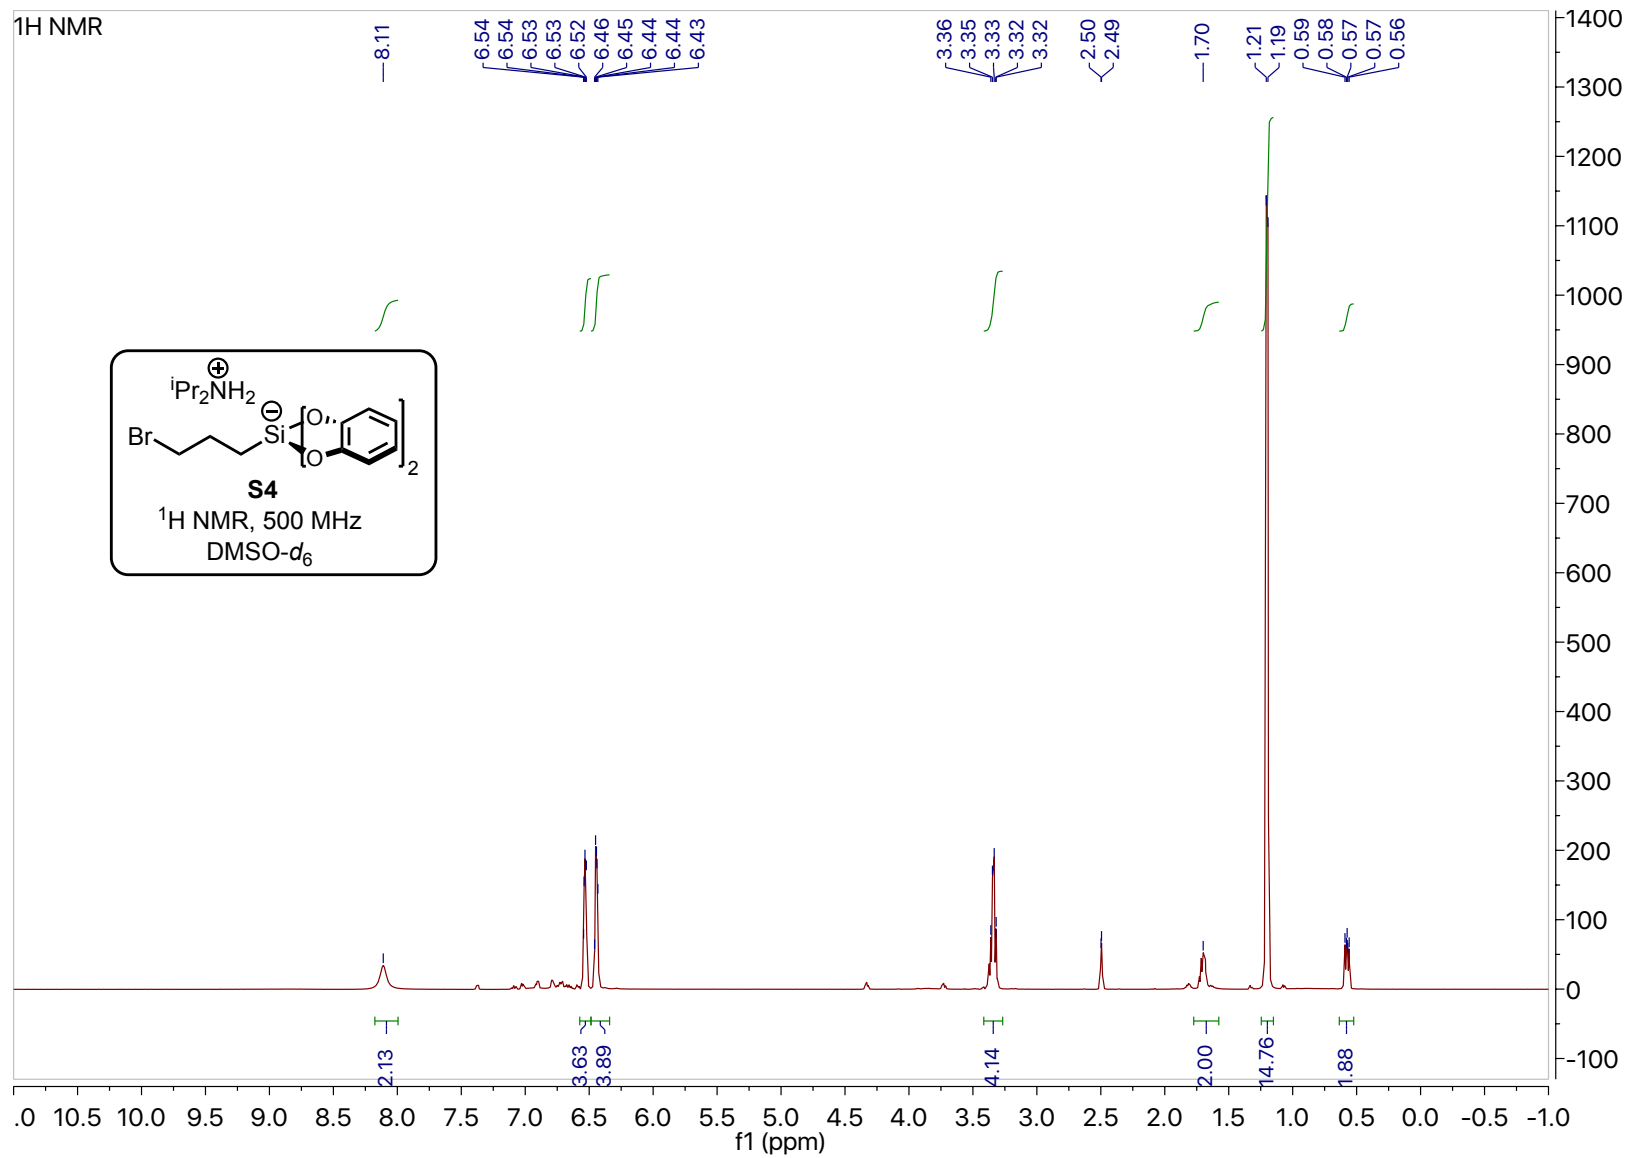

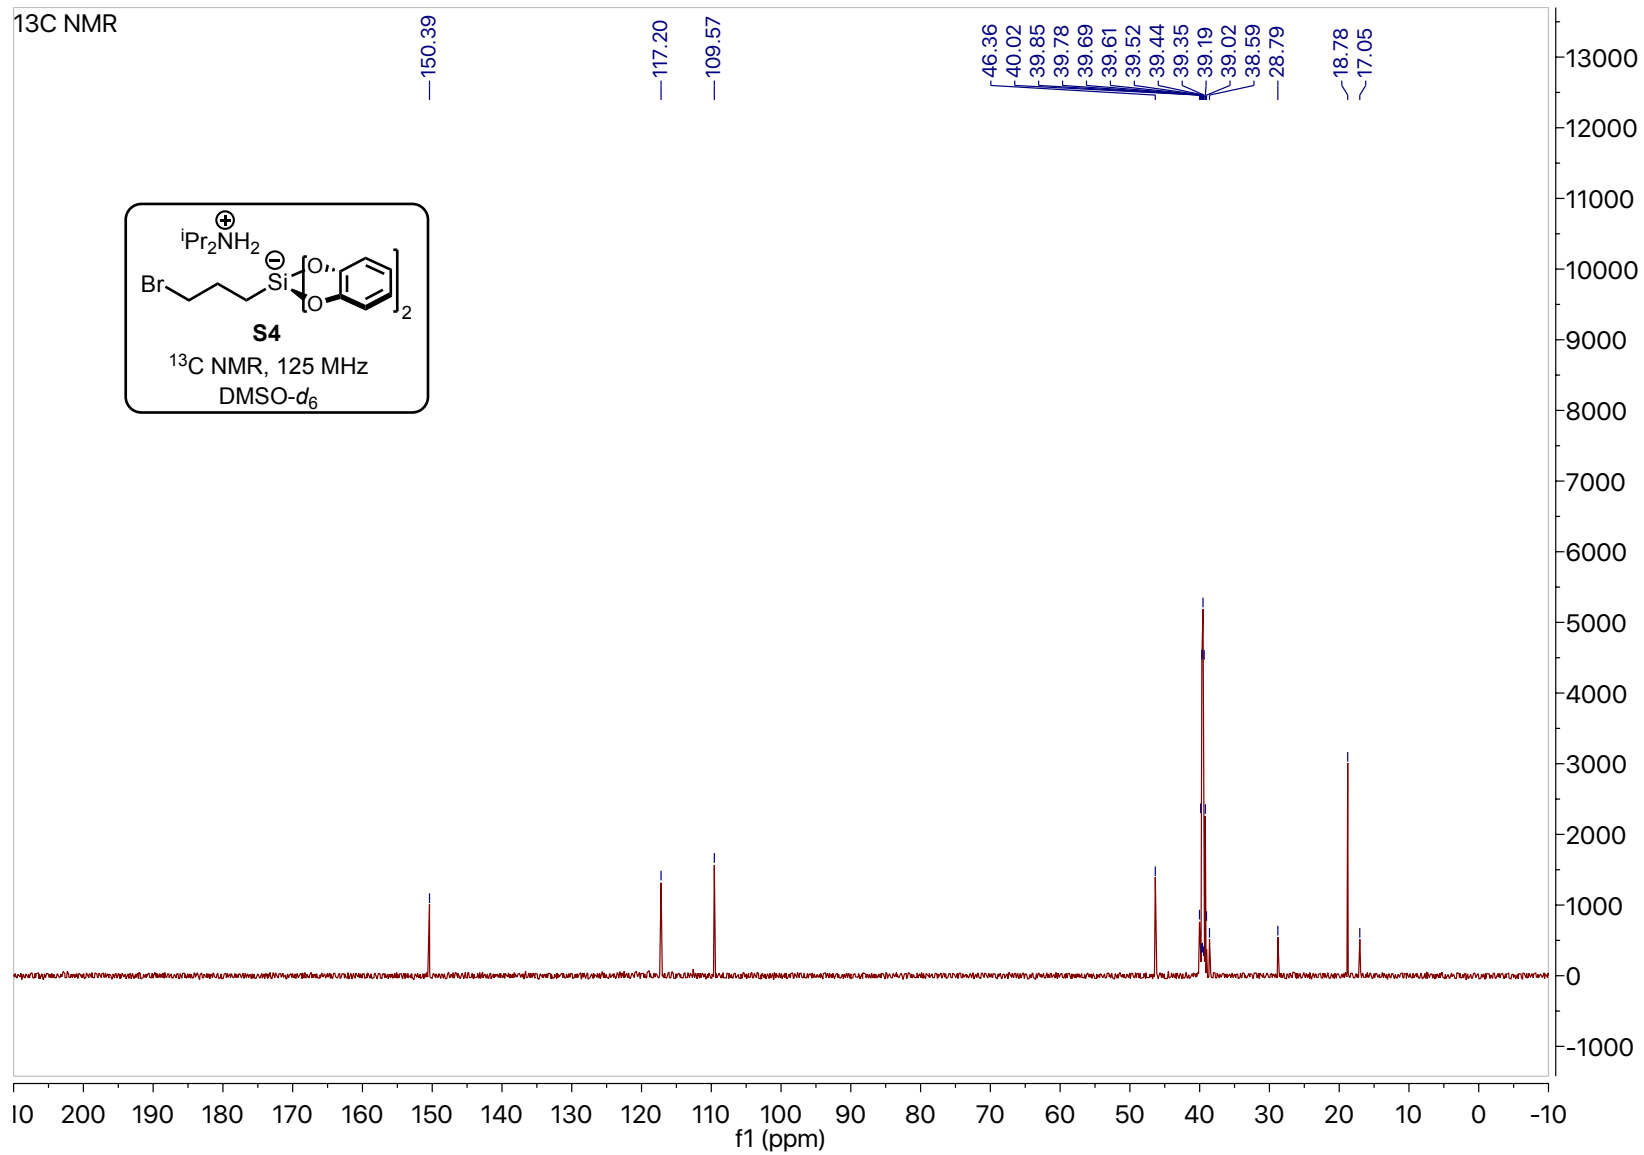

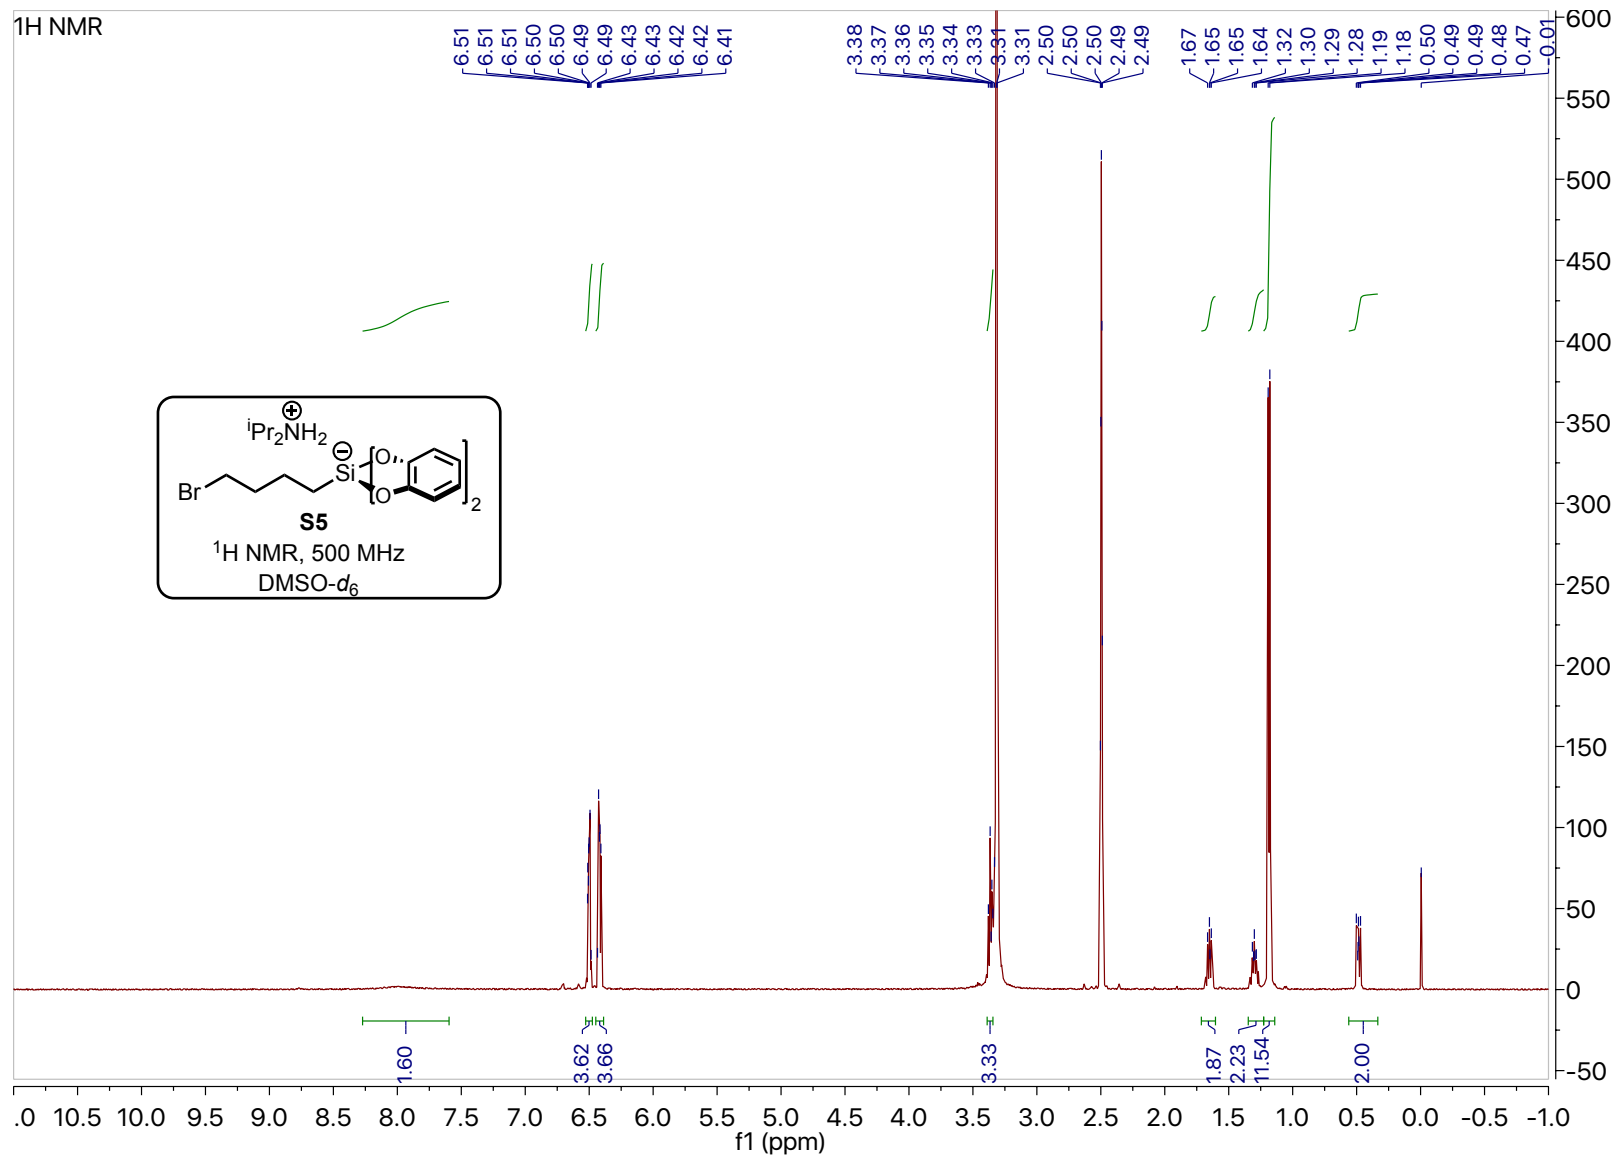

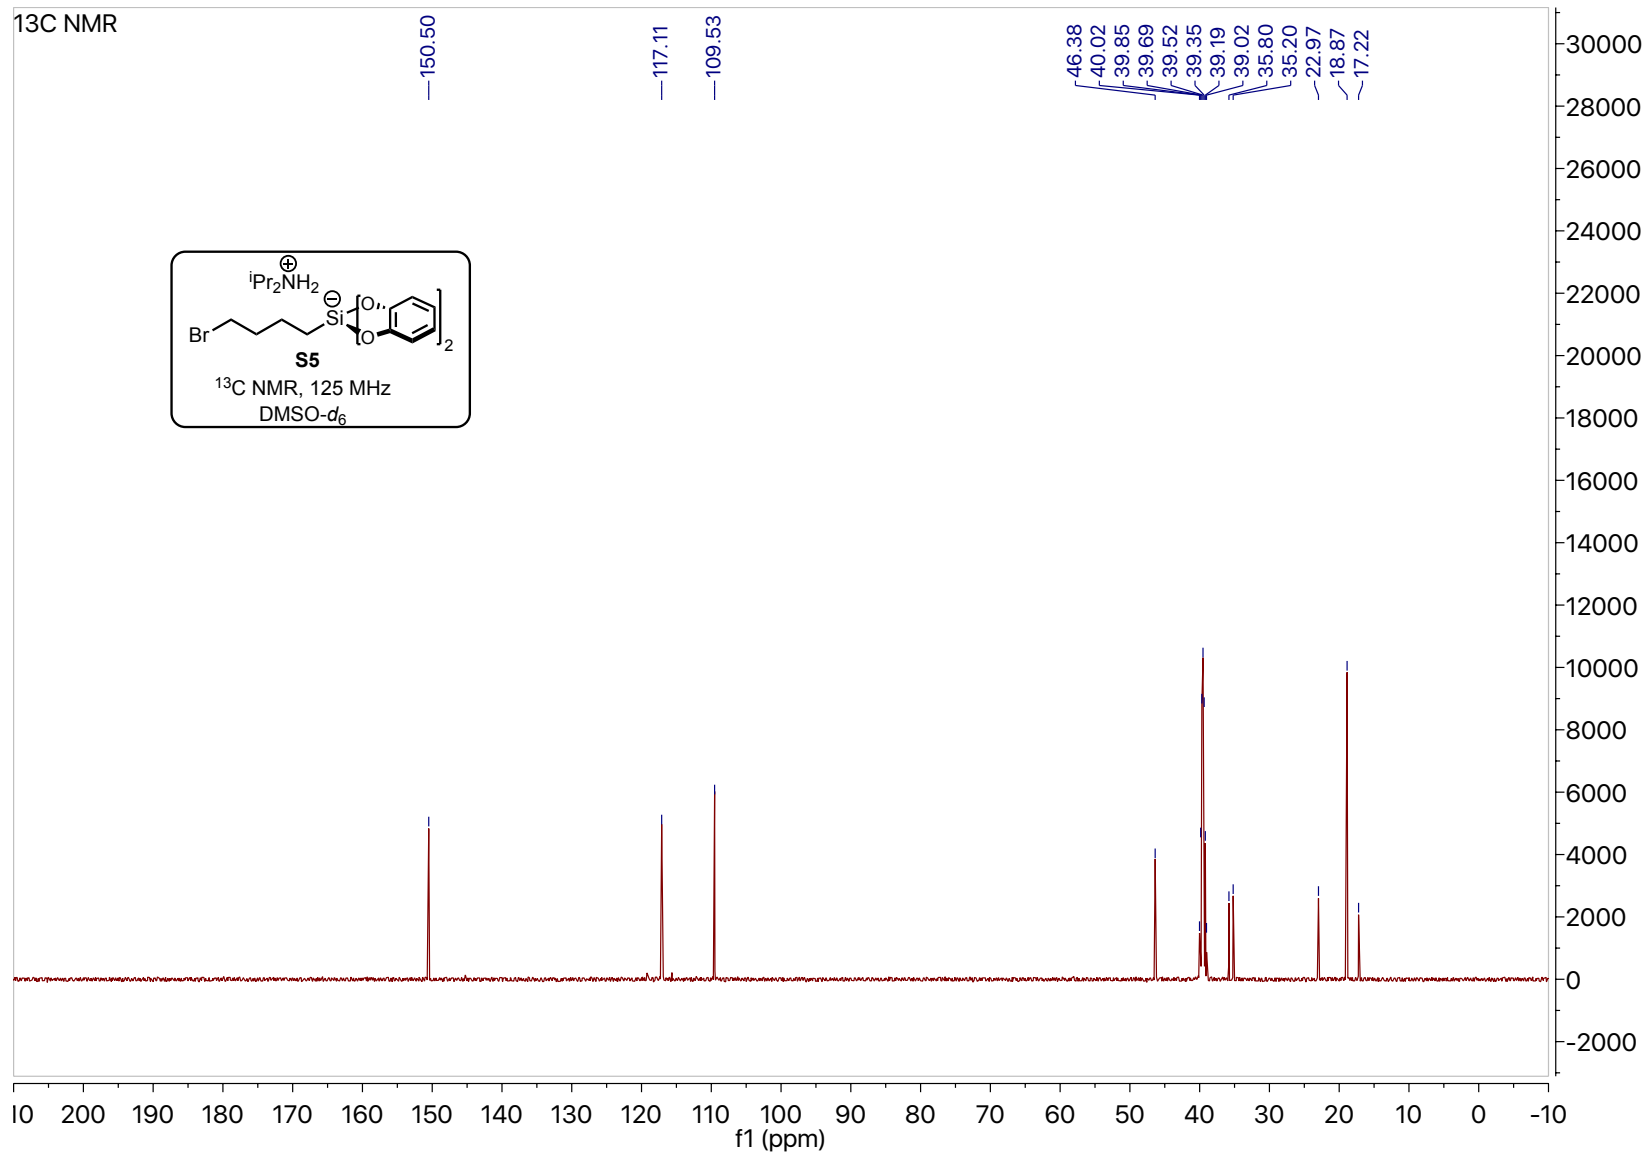

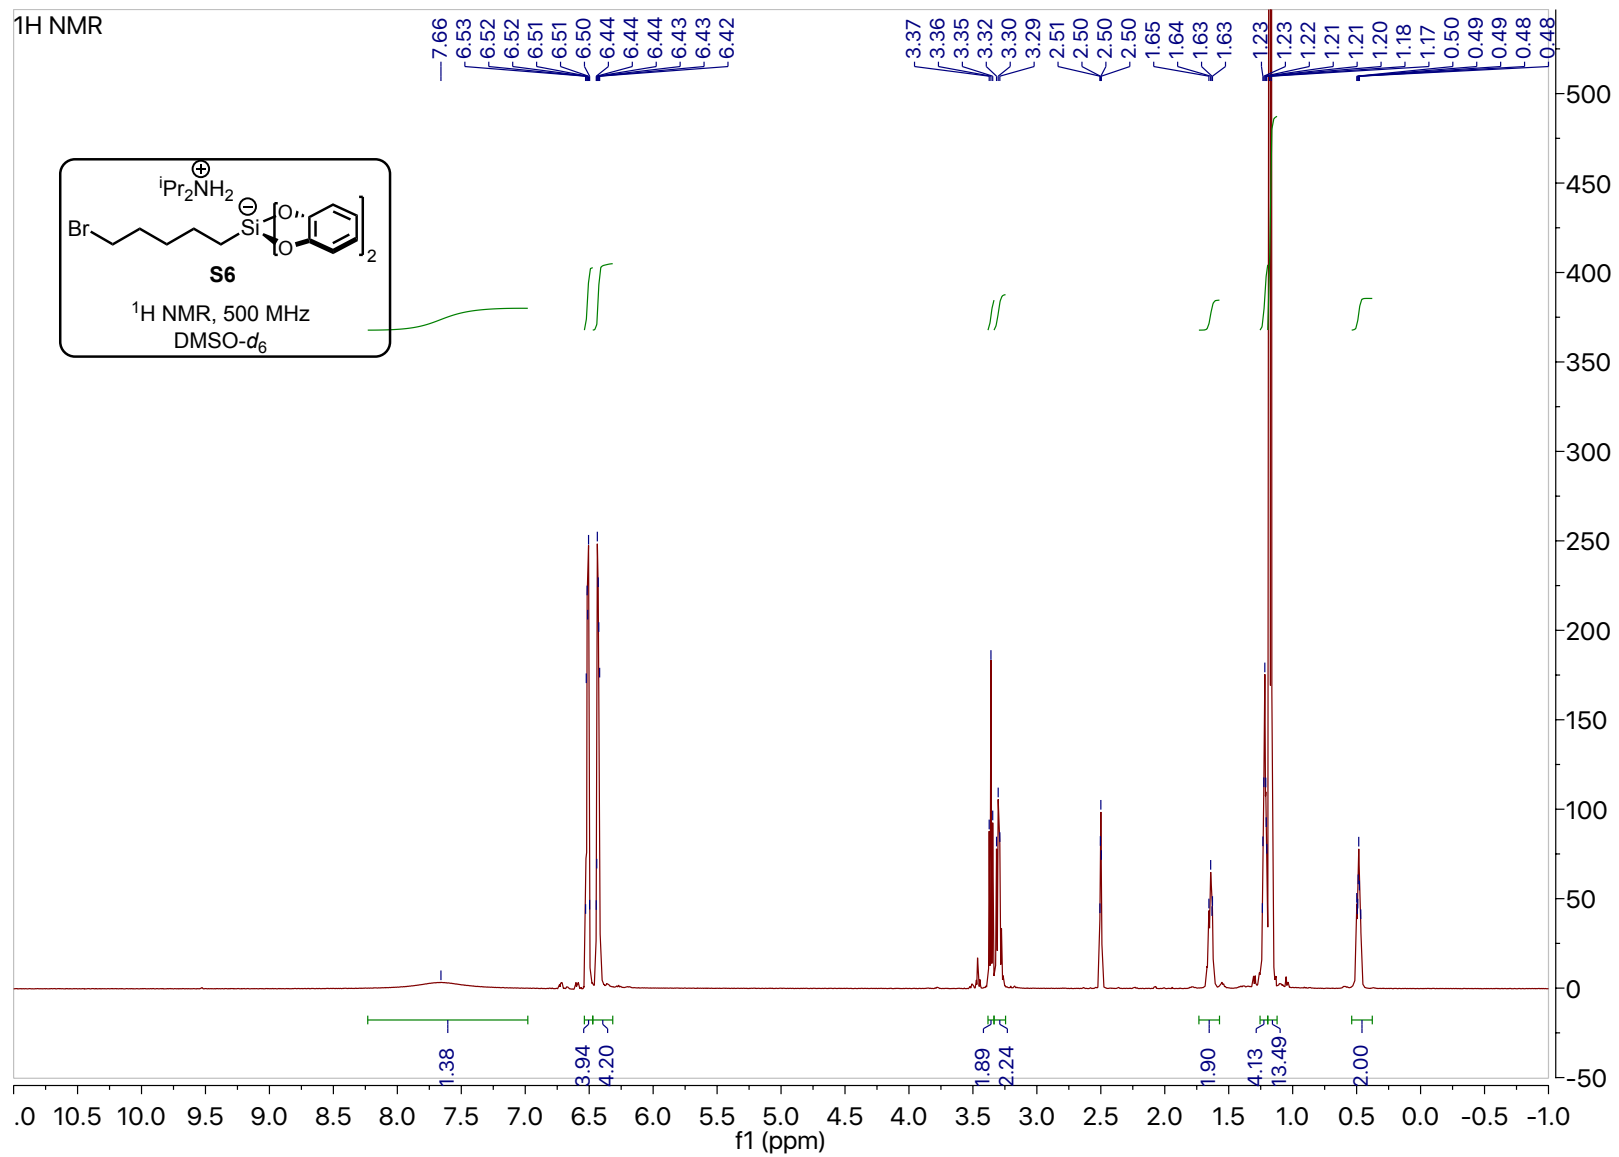



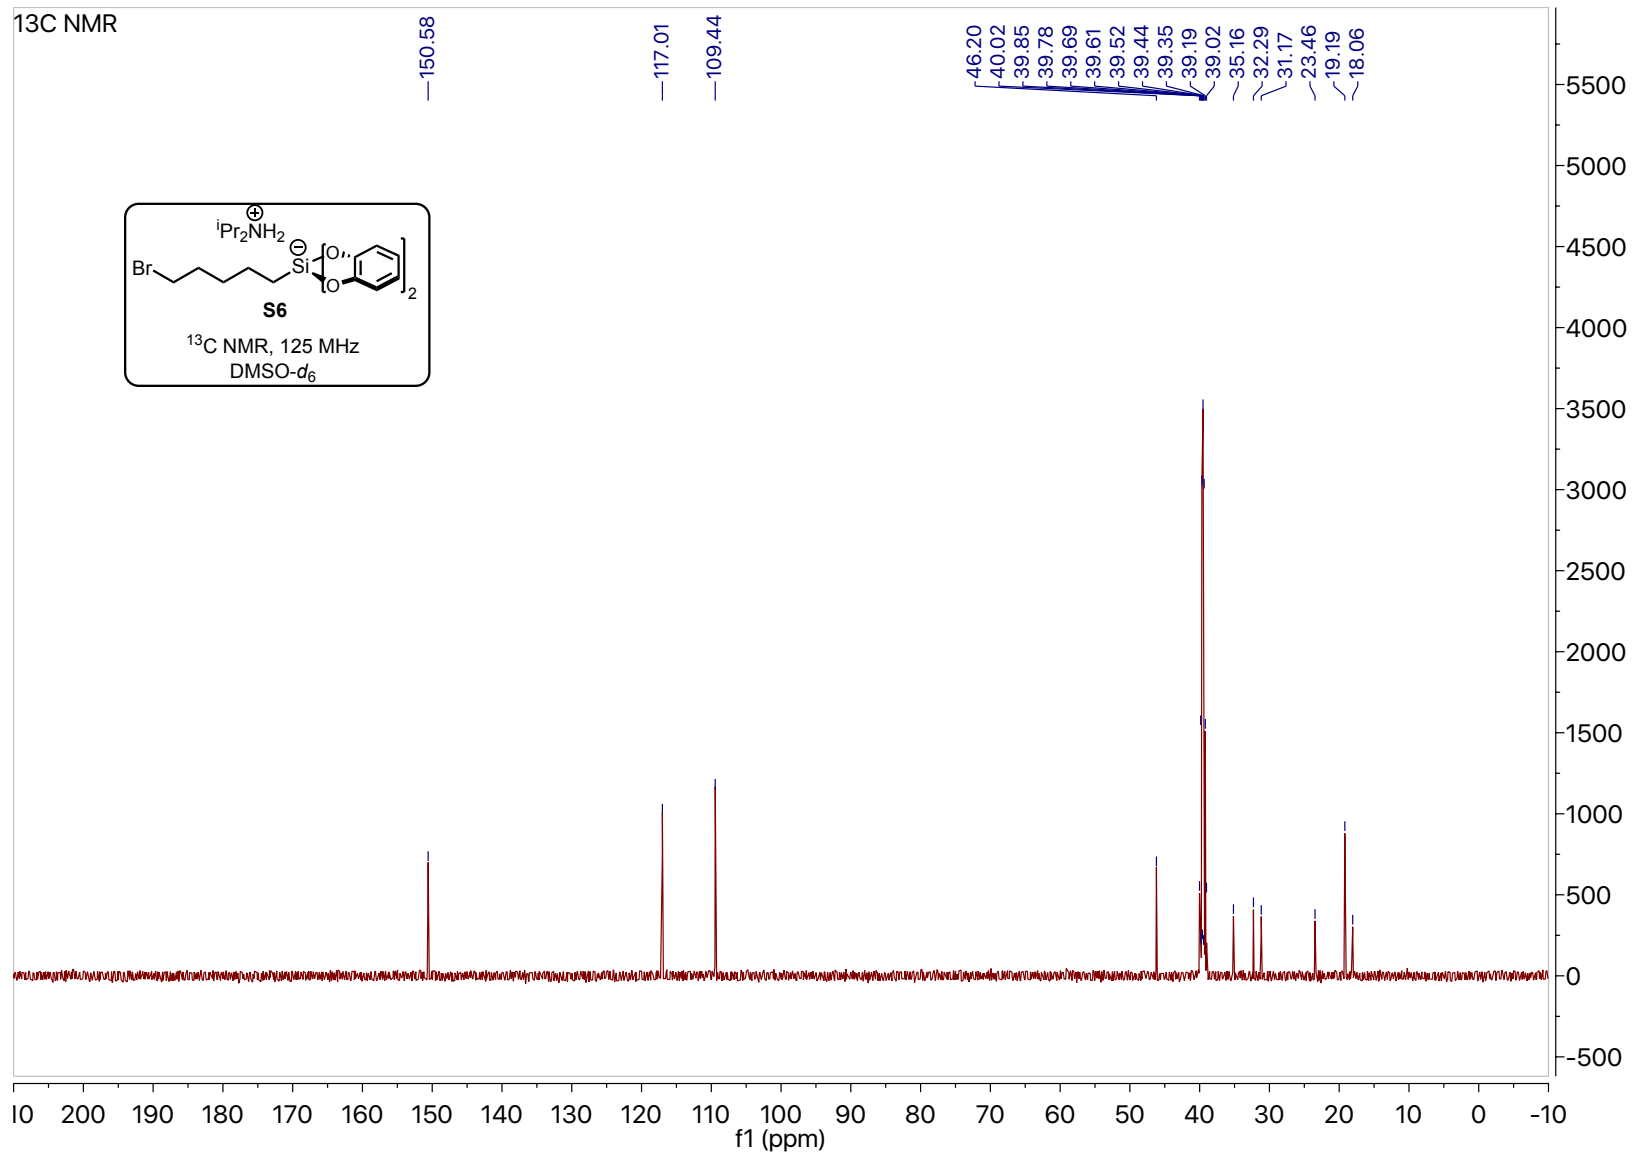

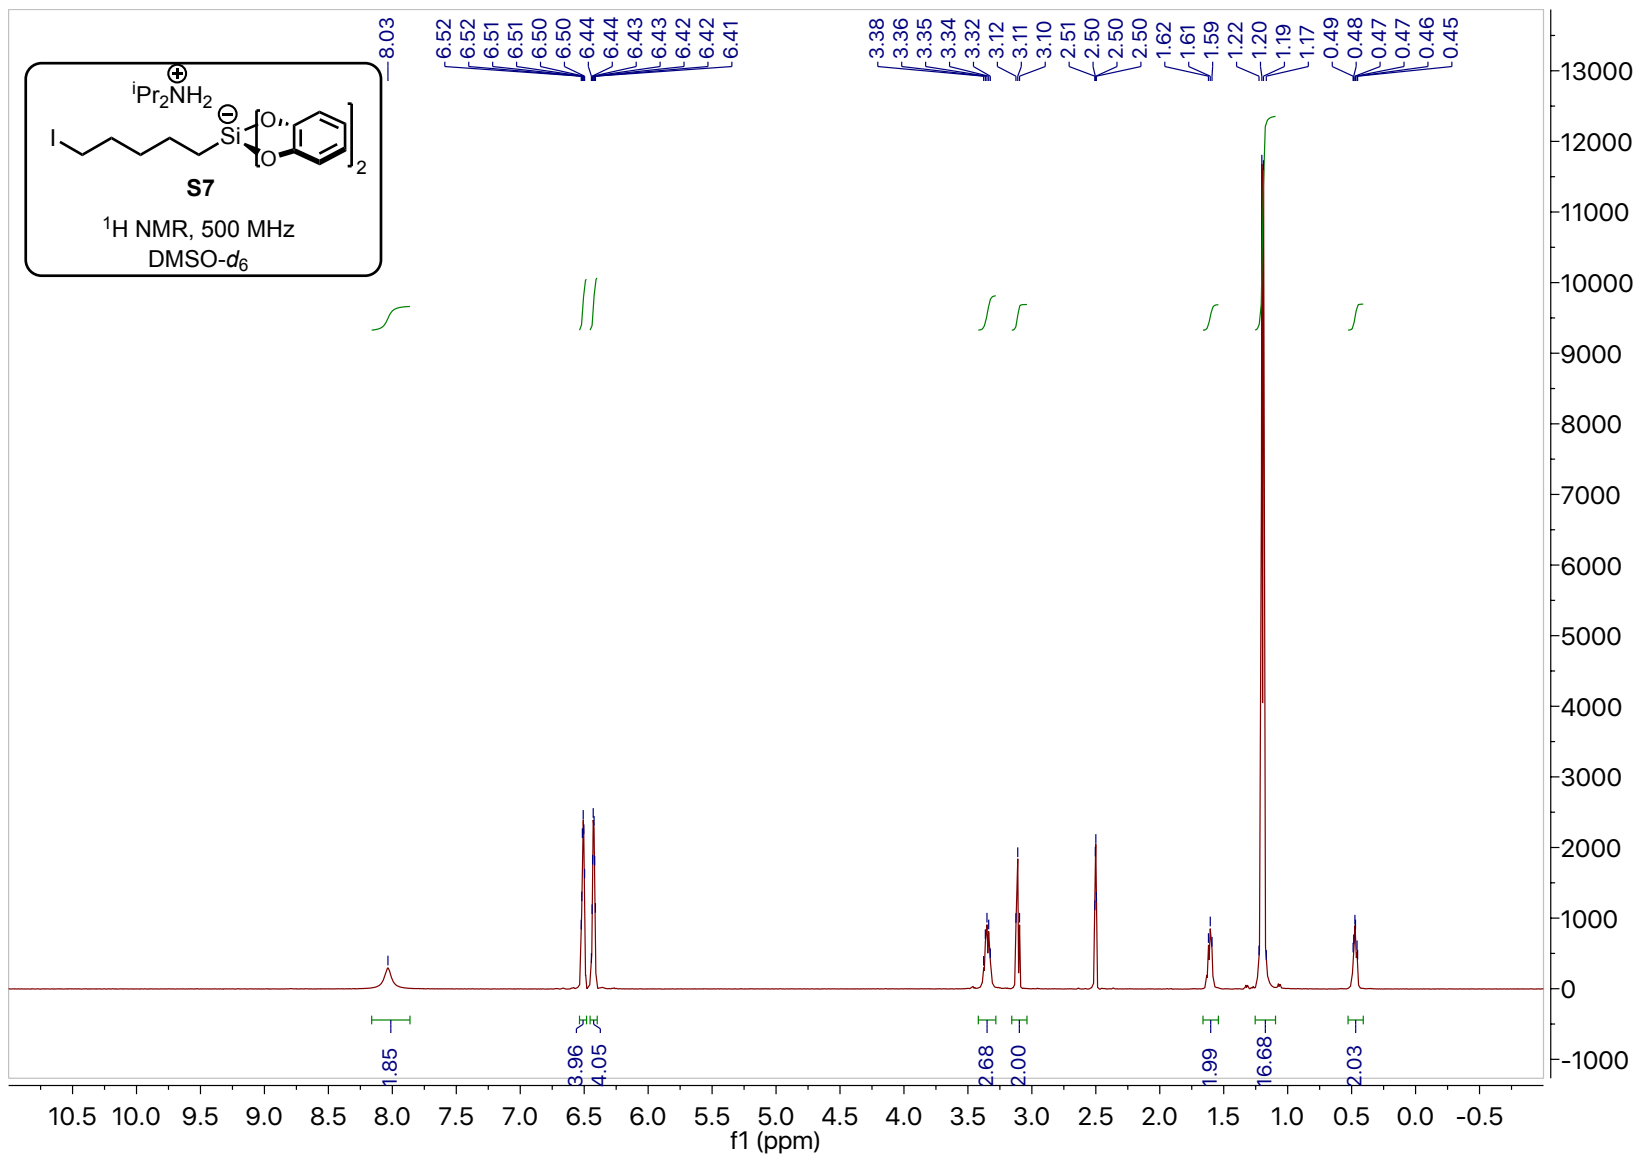

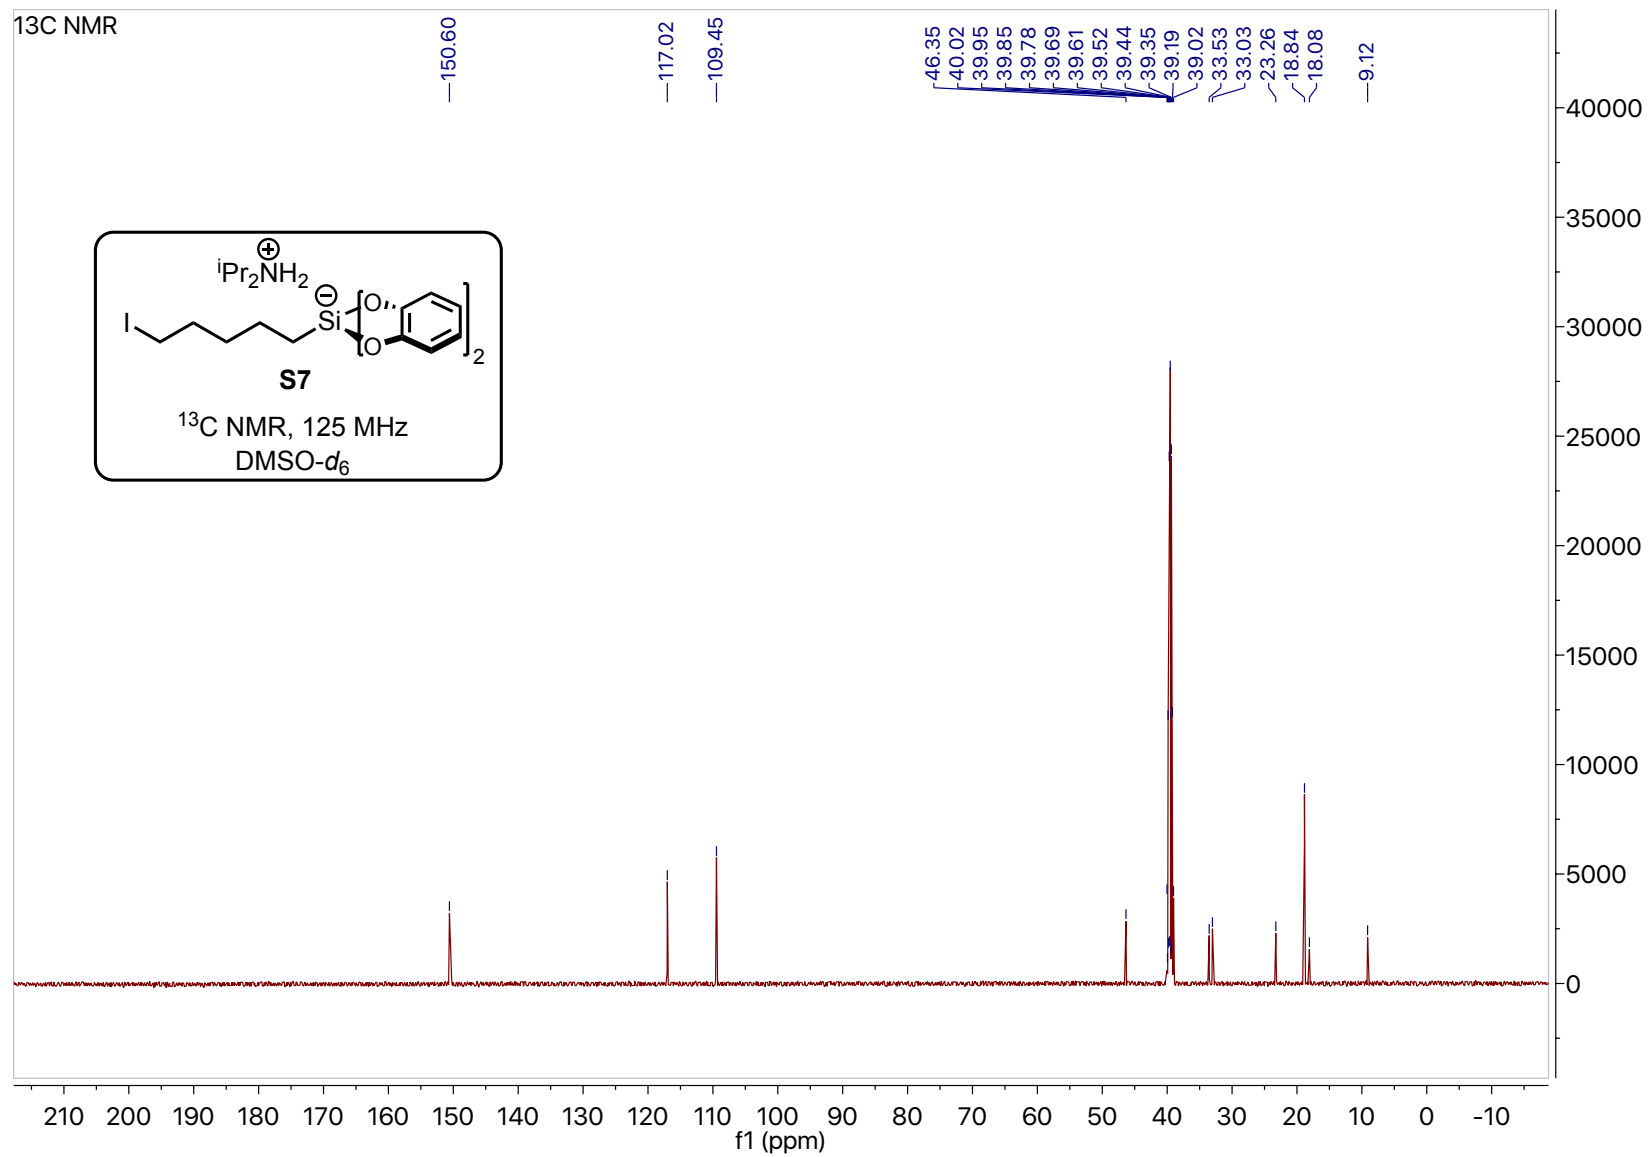

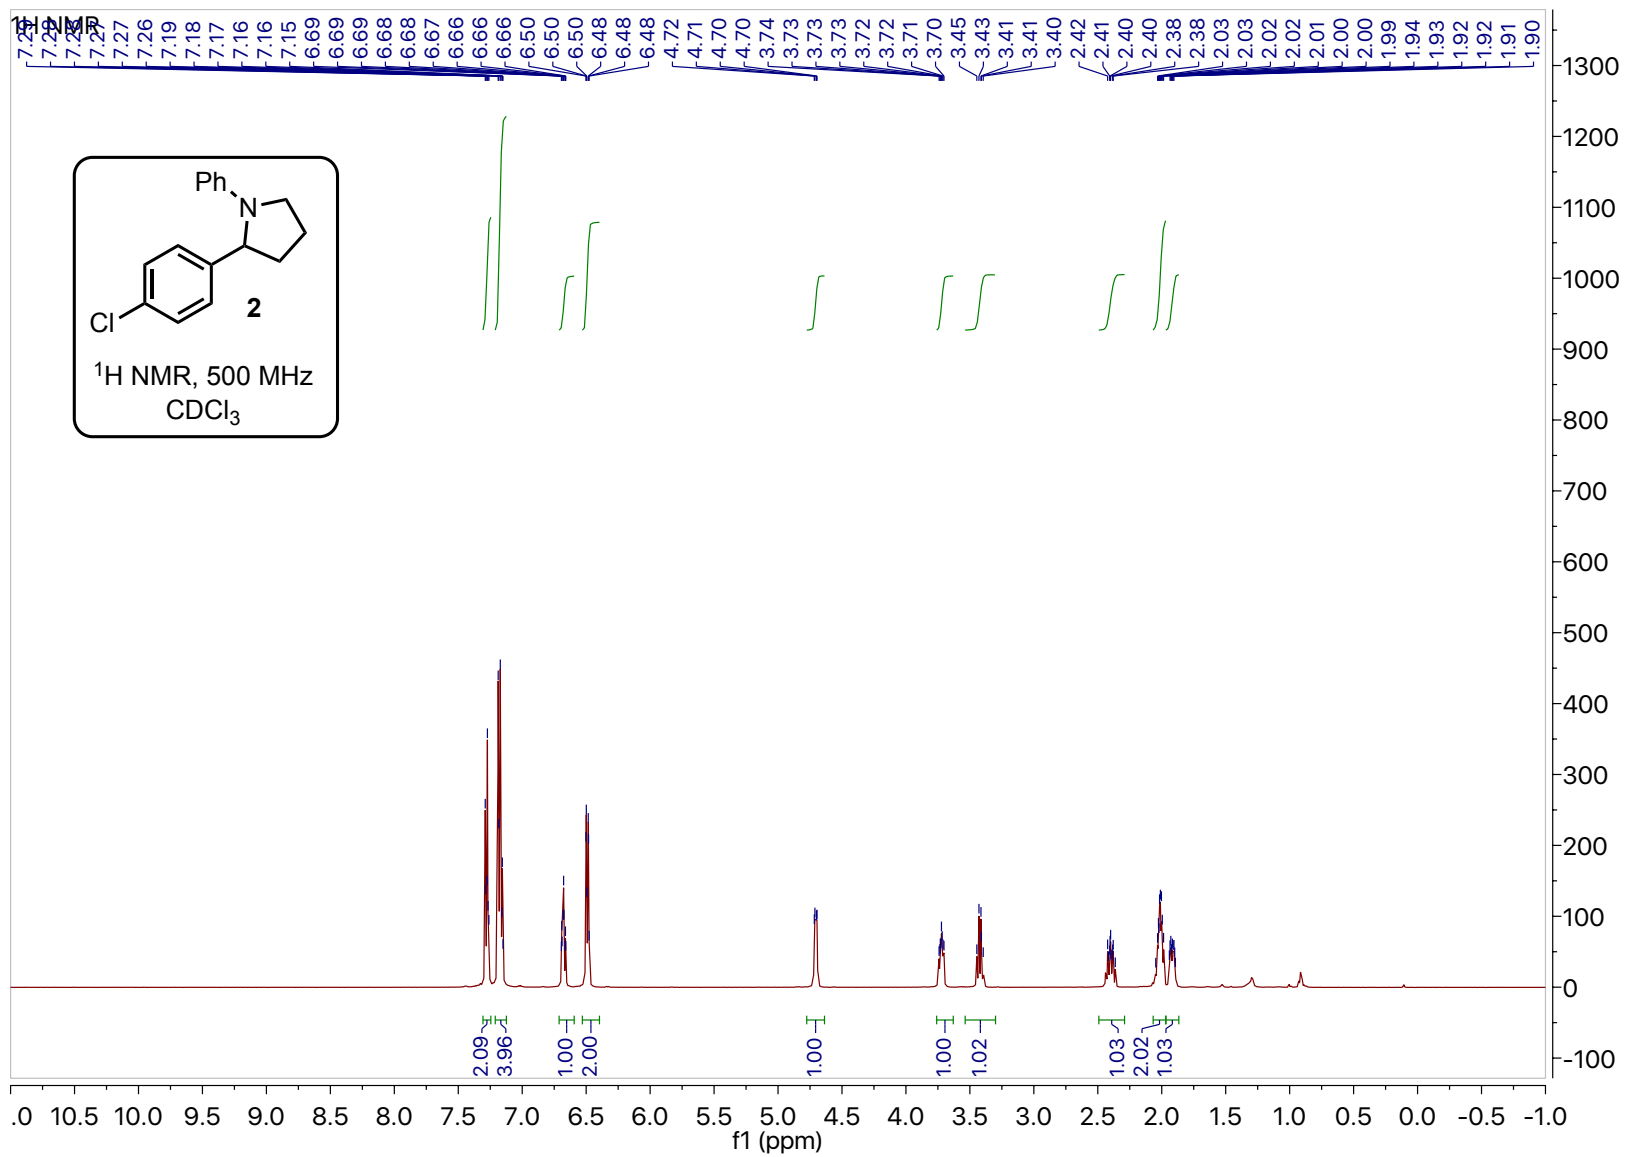

LP283P  
13C NMR

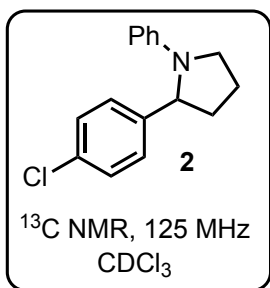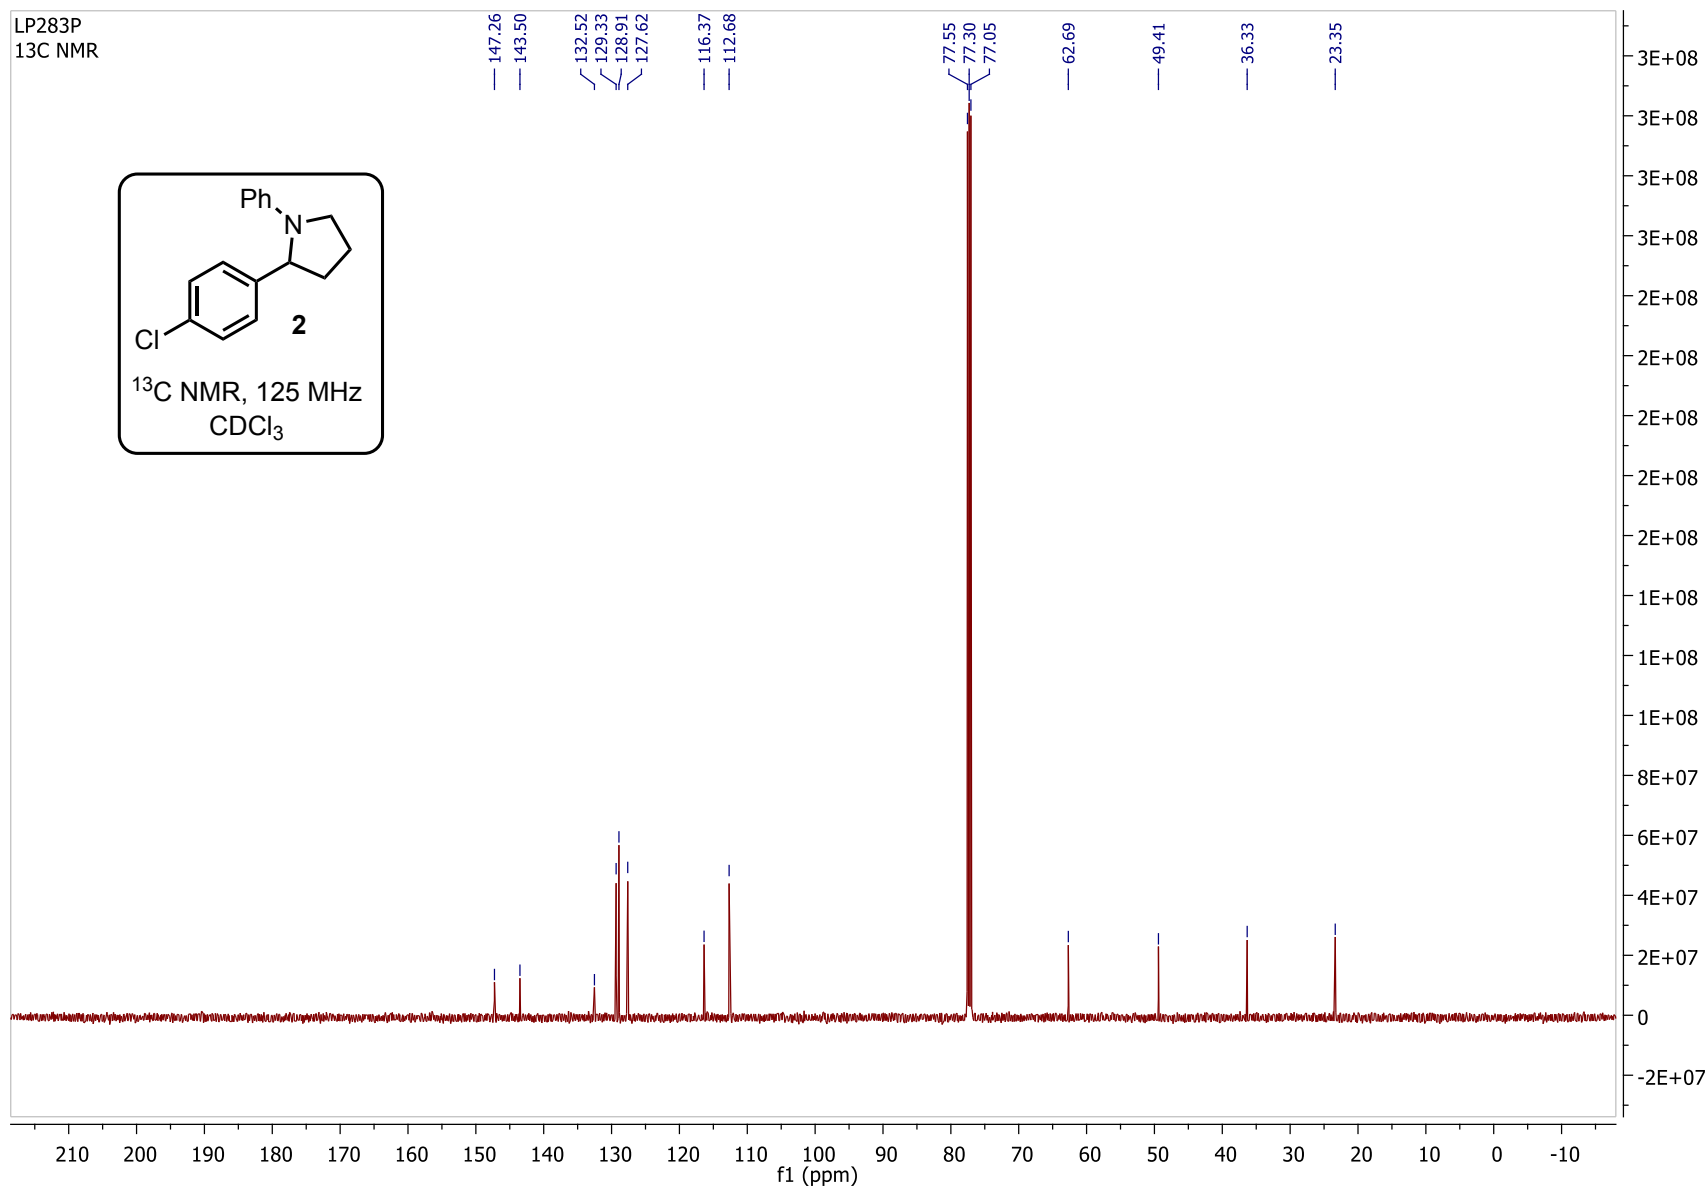

LP295P  
1H NMR

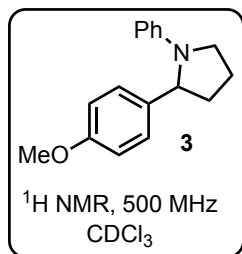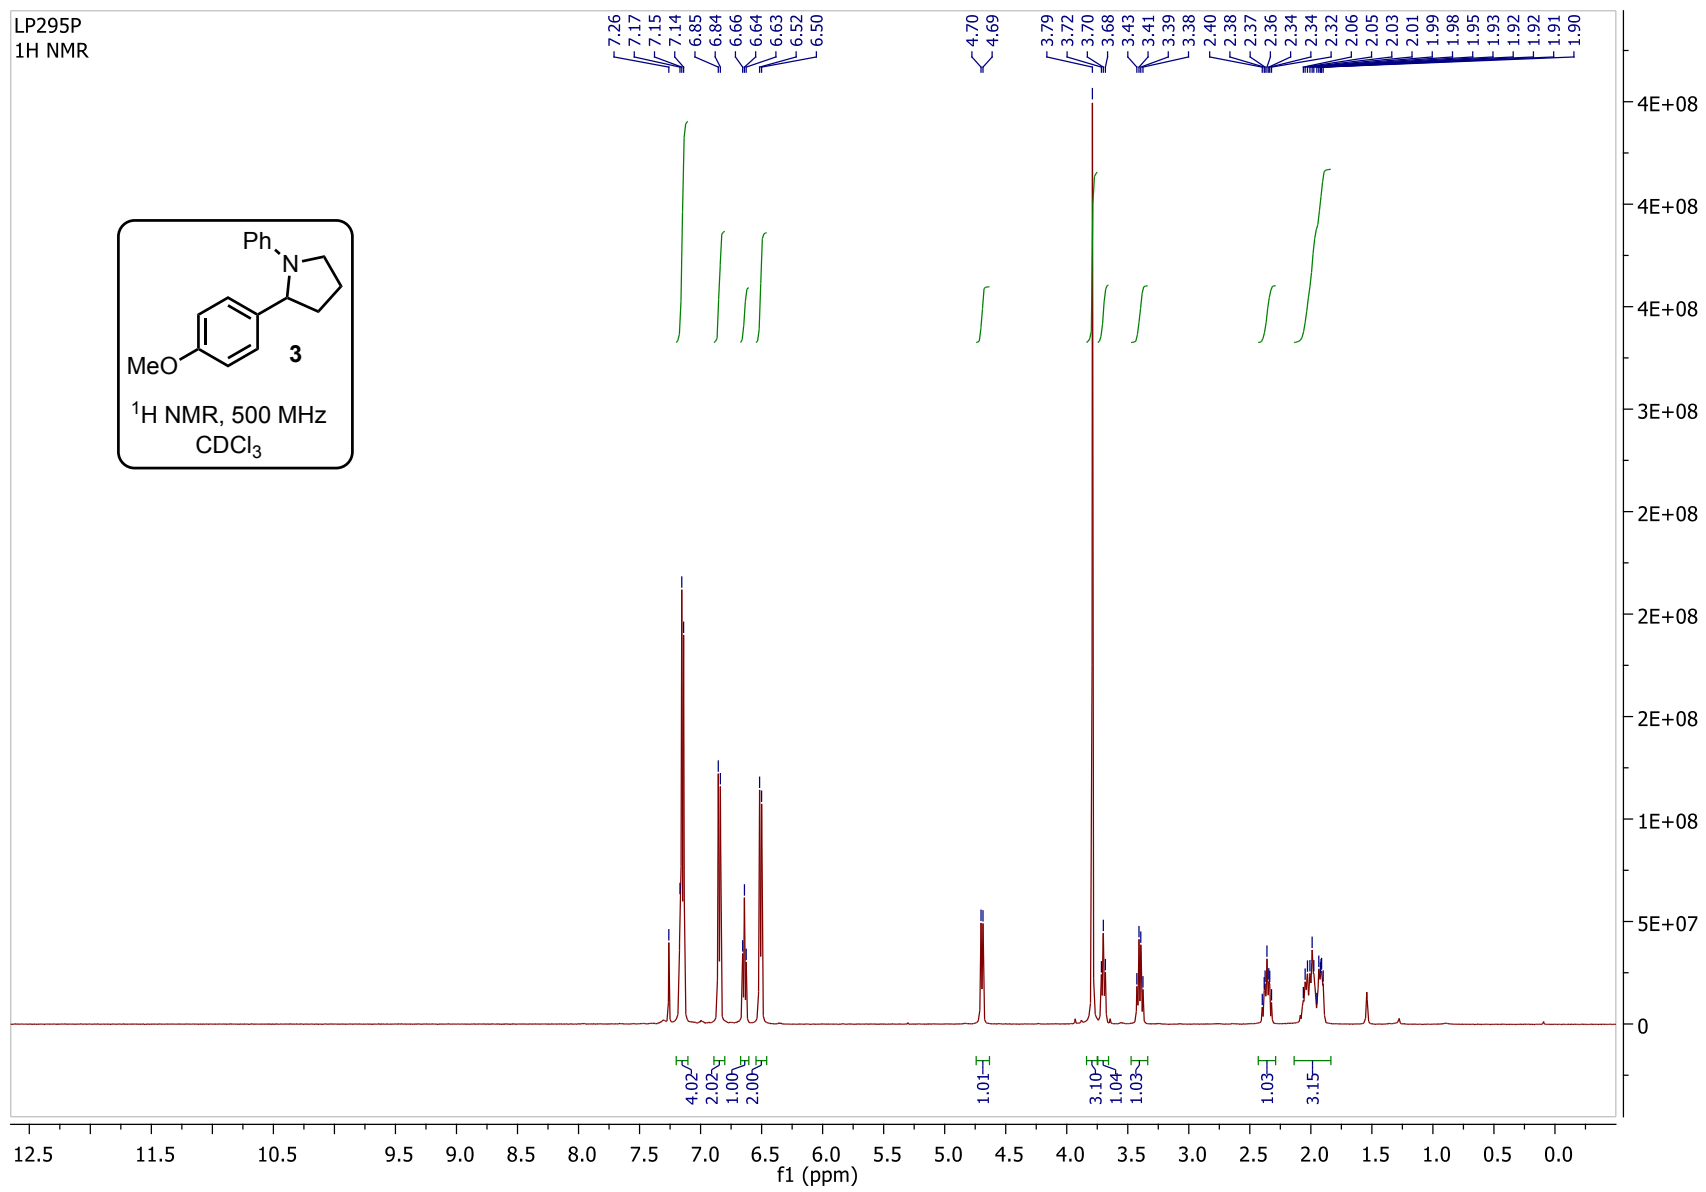

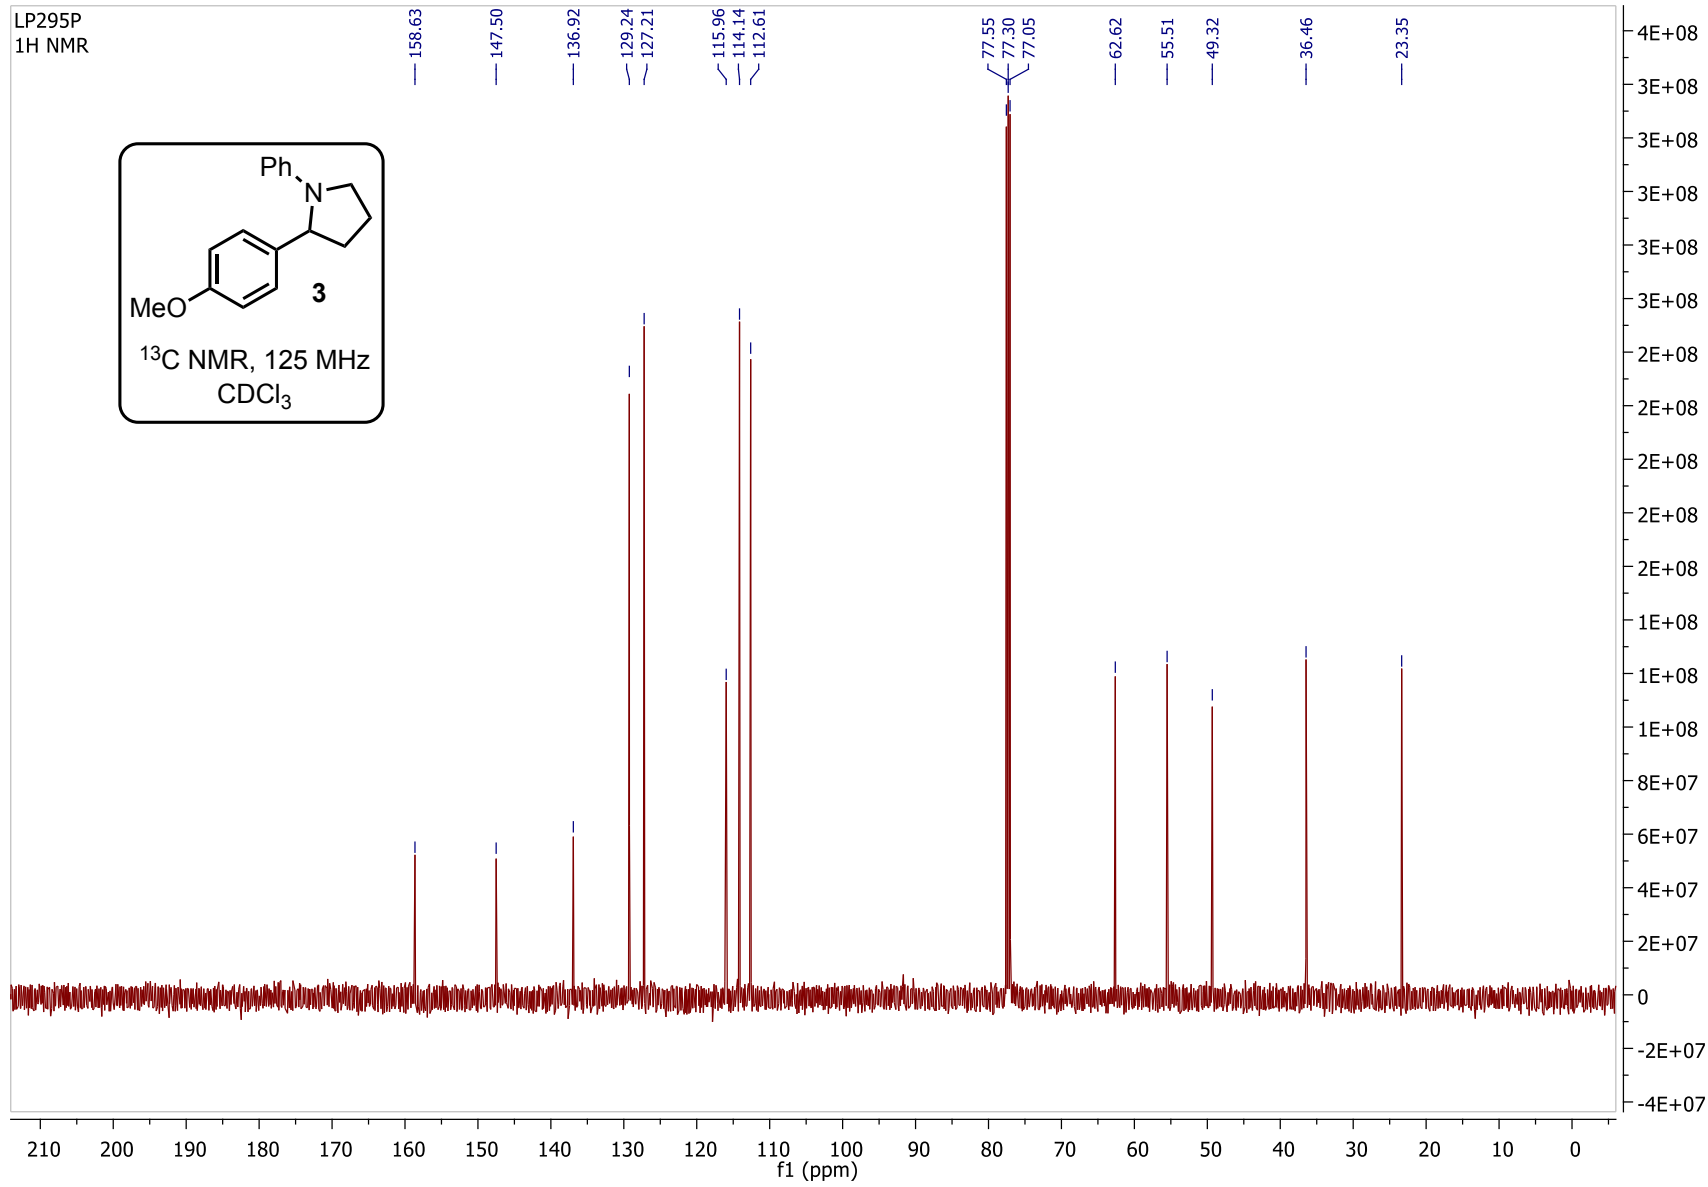

LP317P  
1H NMR

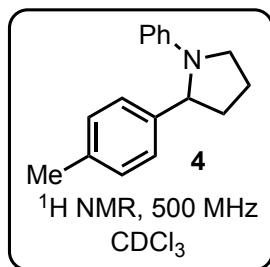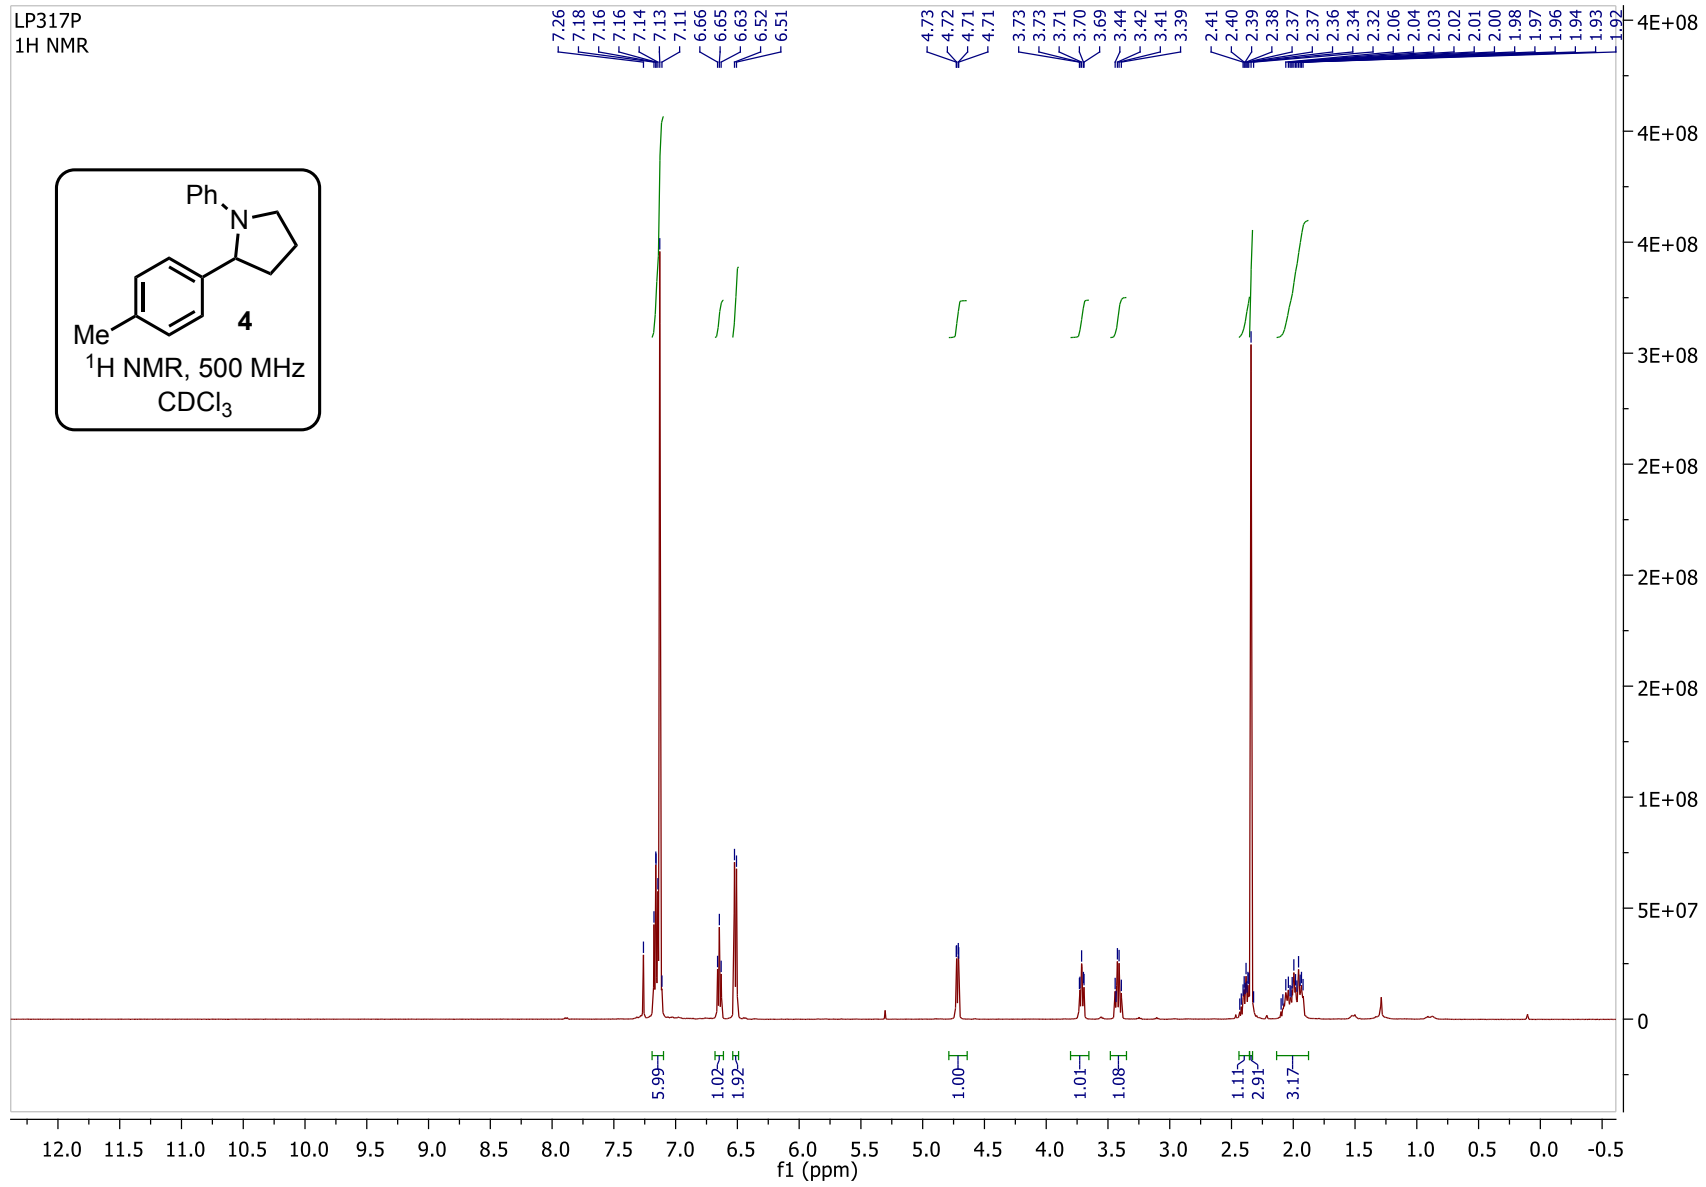



LP317P  
13C NMR

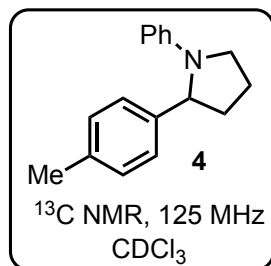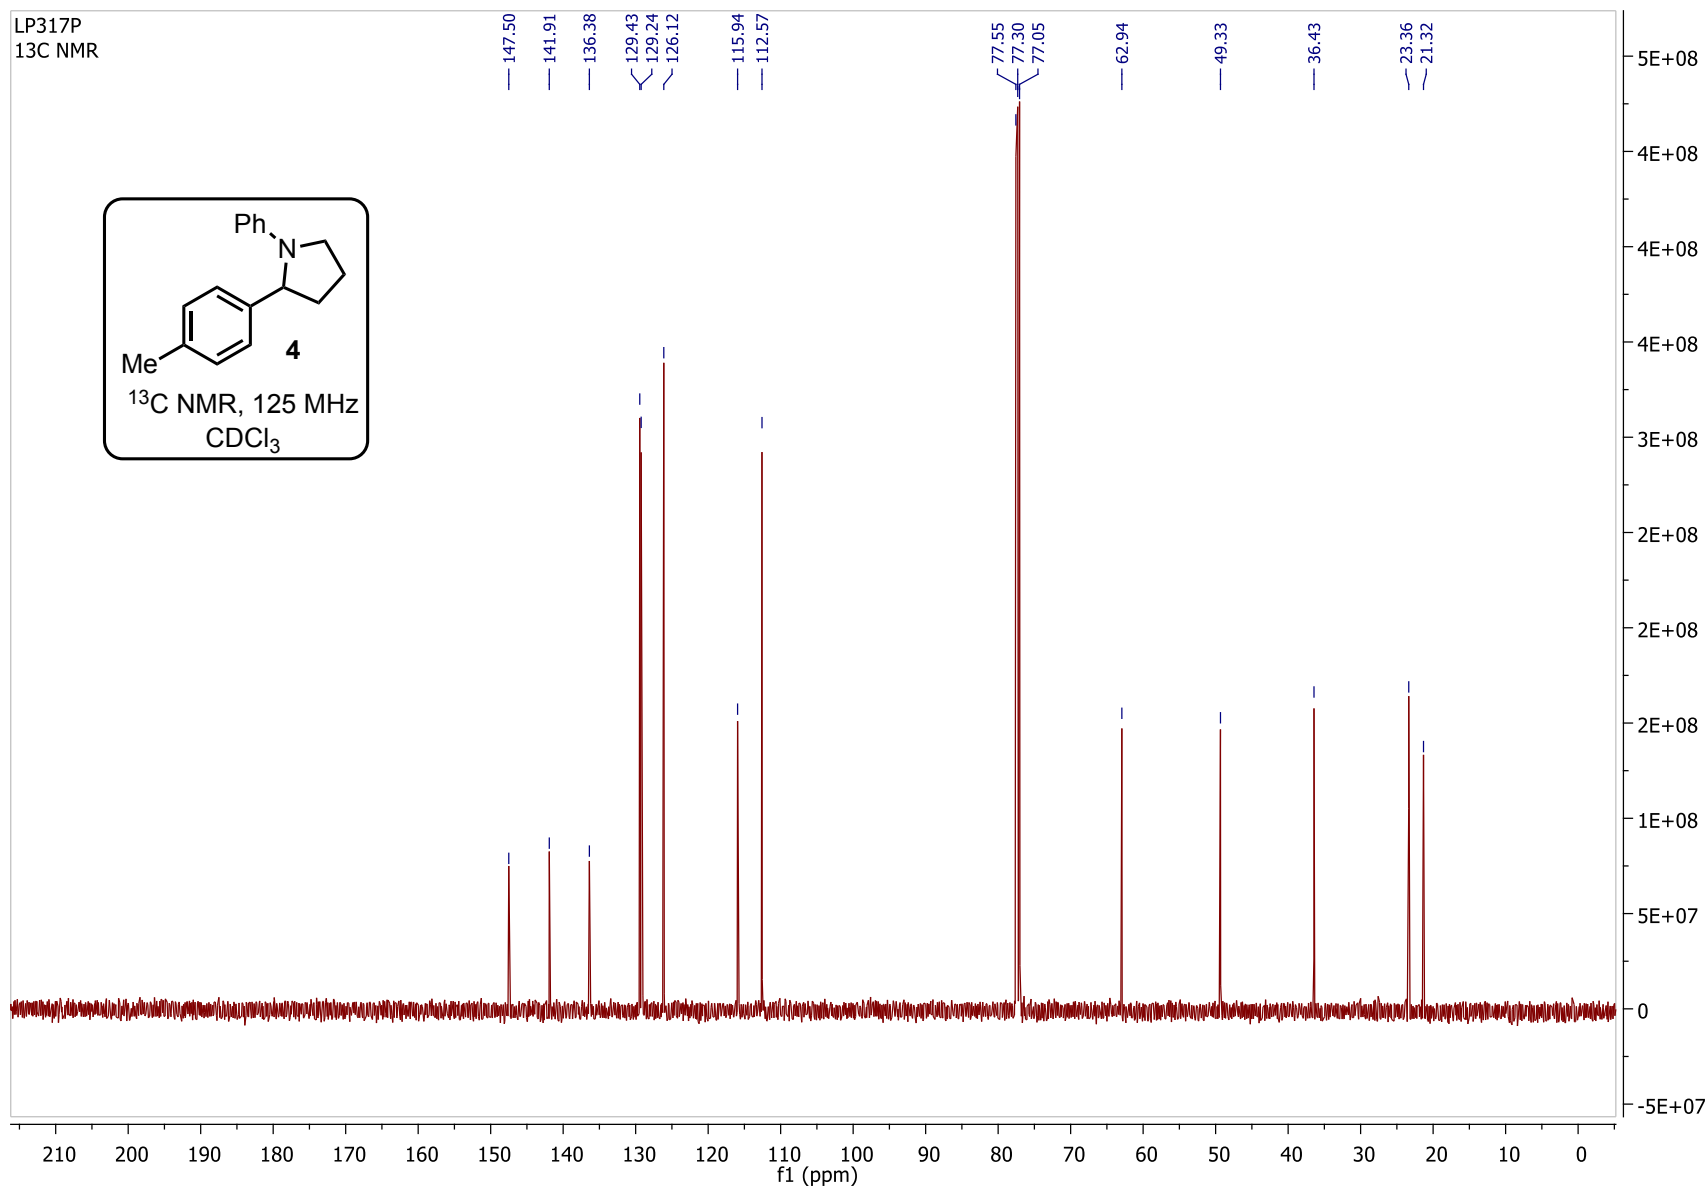

LP335P  
1H NMR

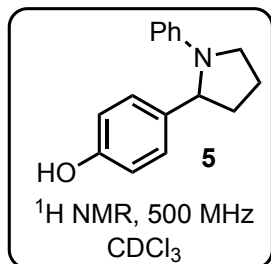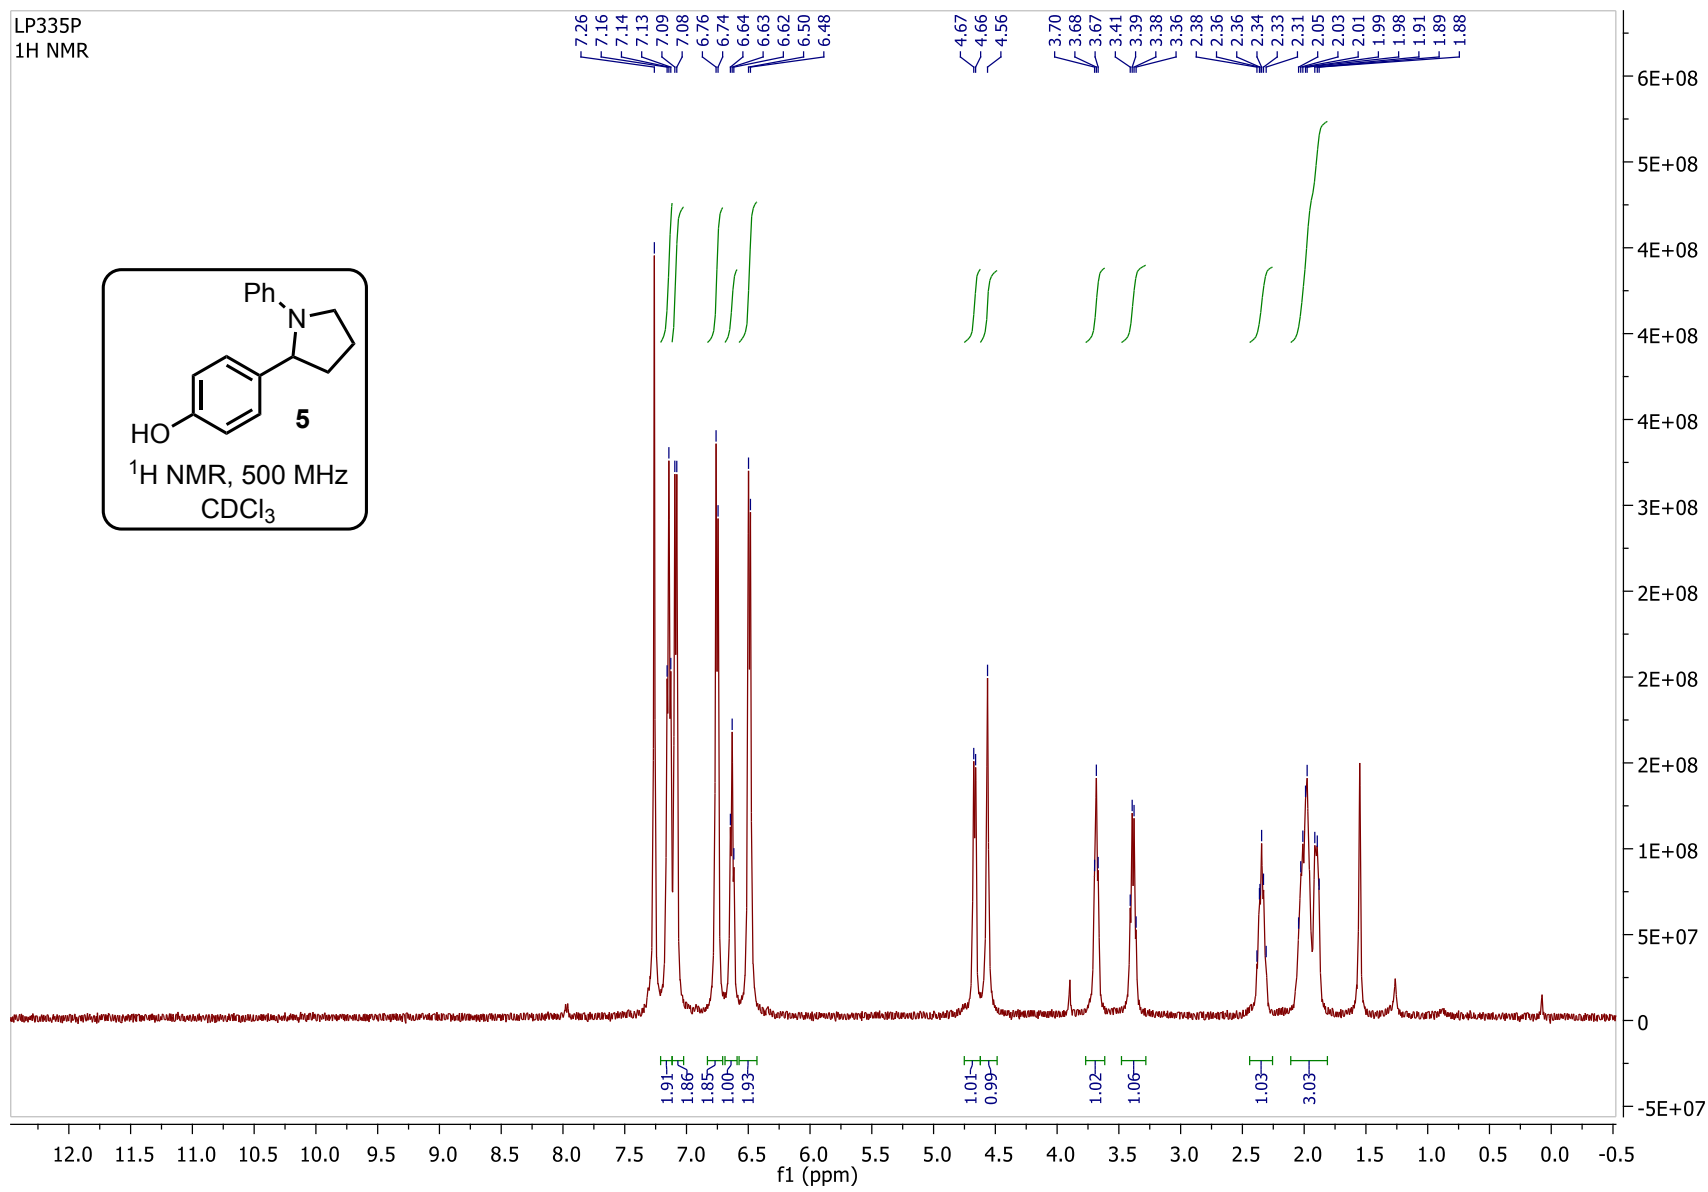

LP335P  
13C NMR

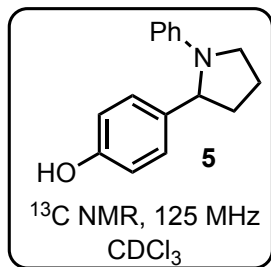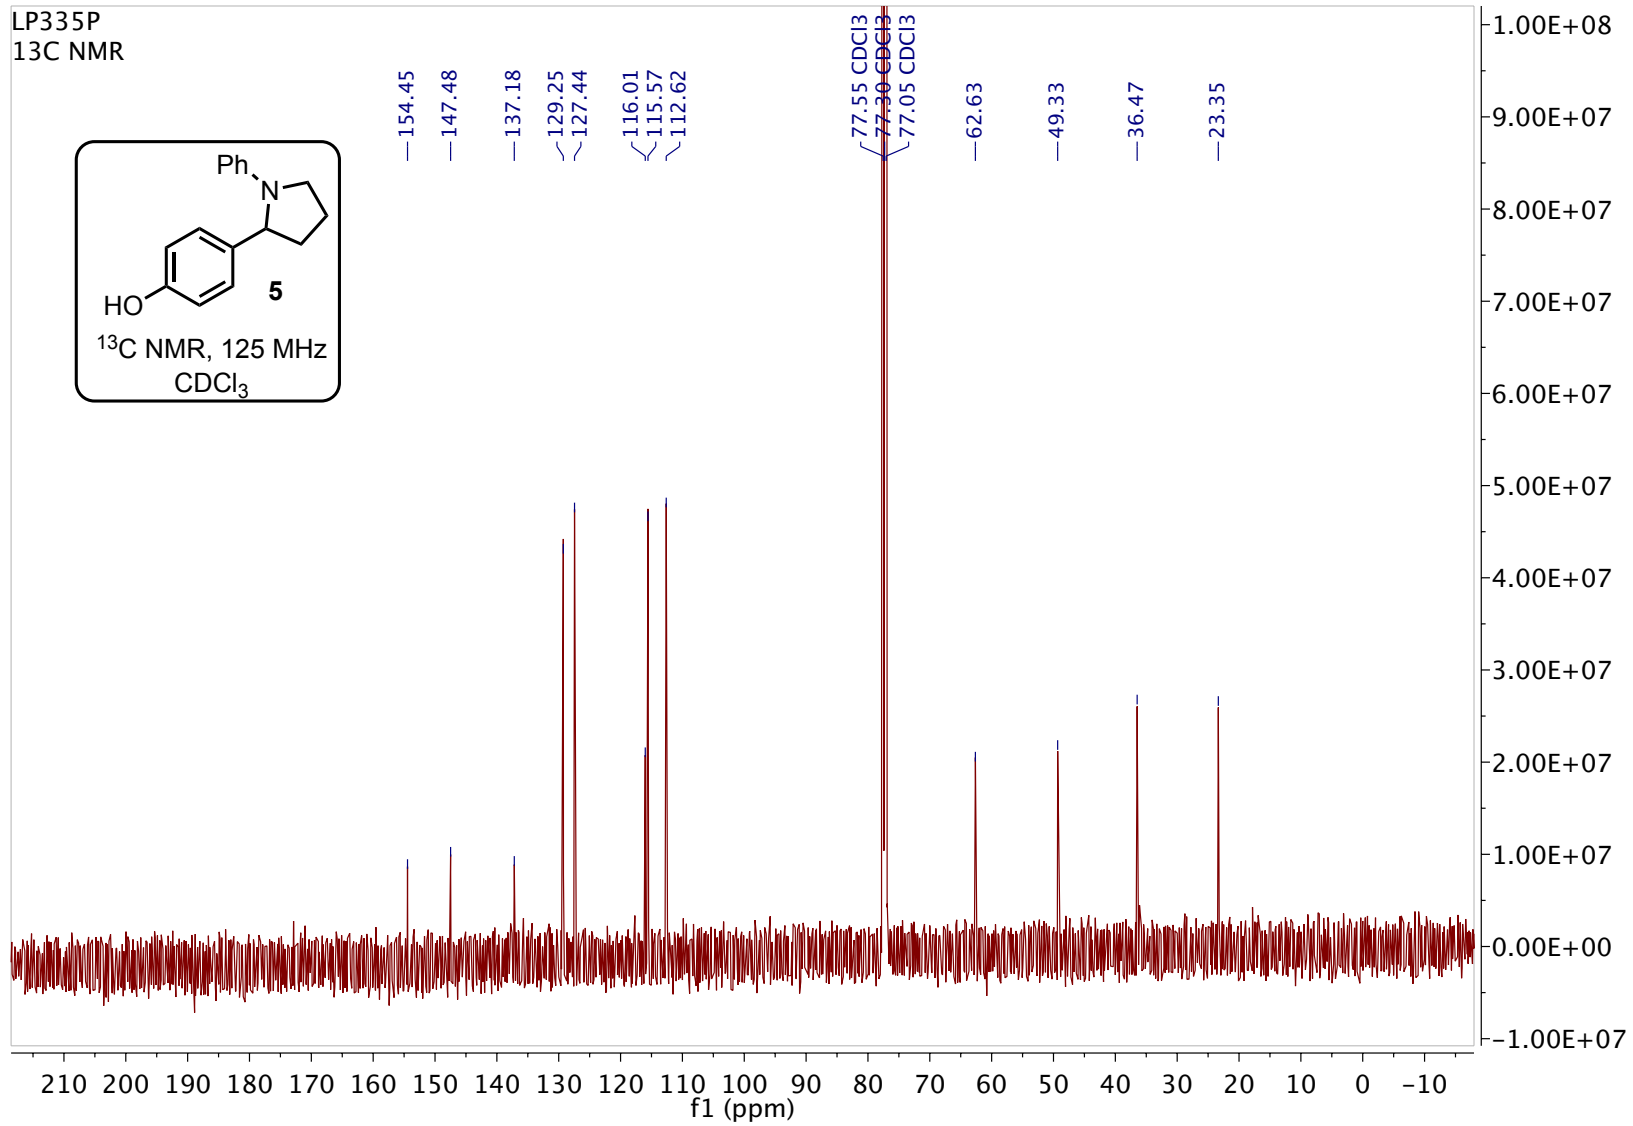

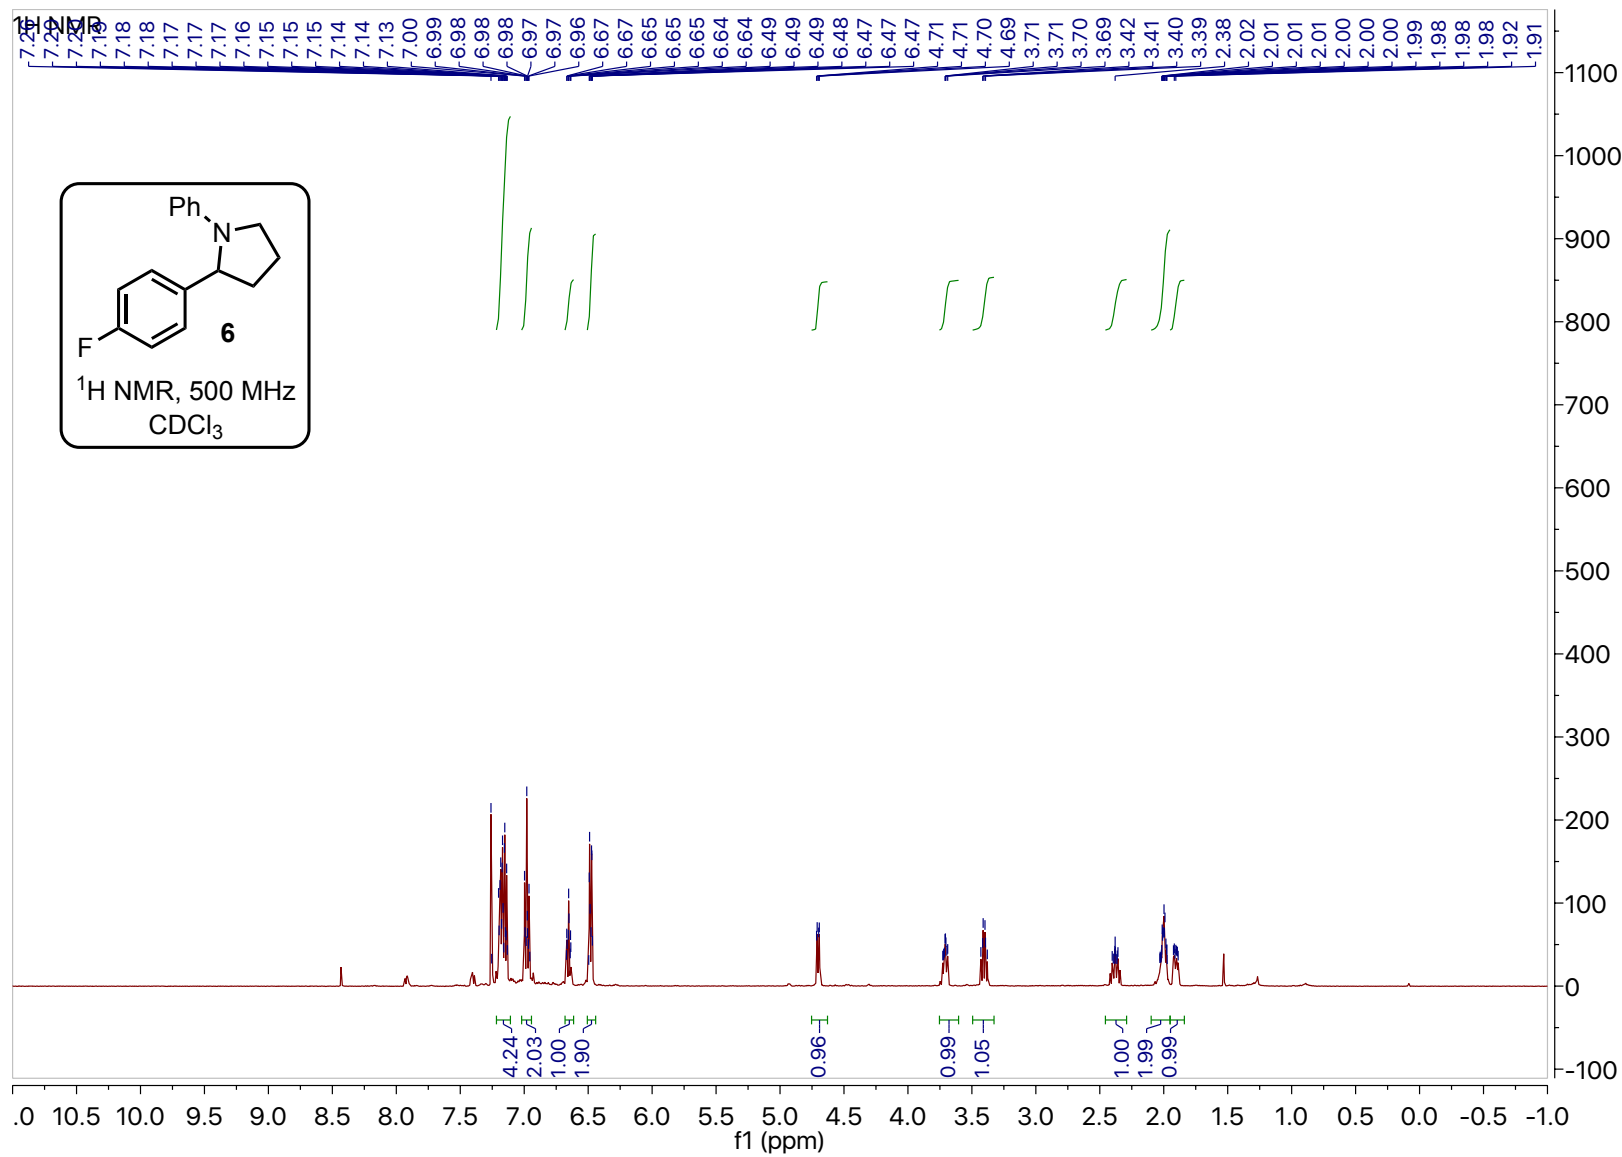

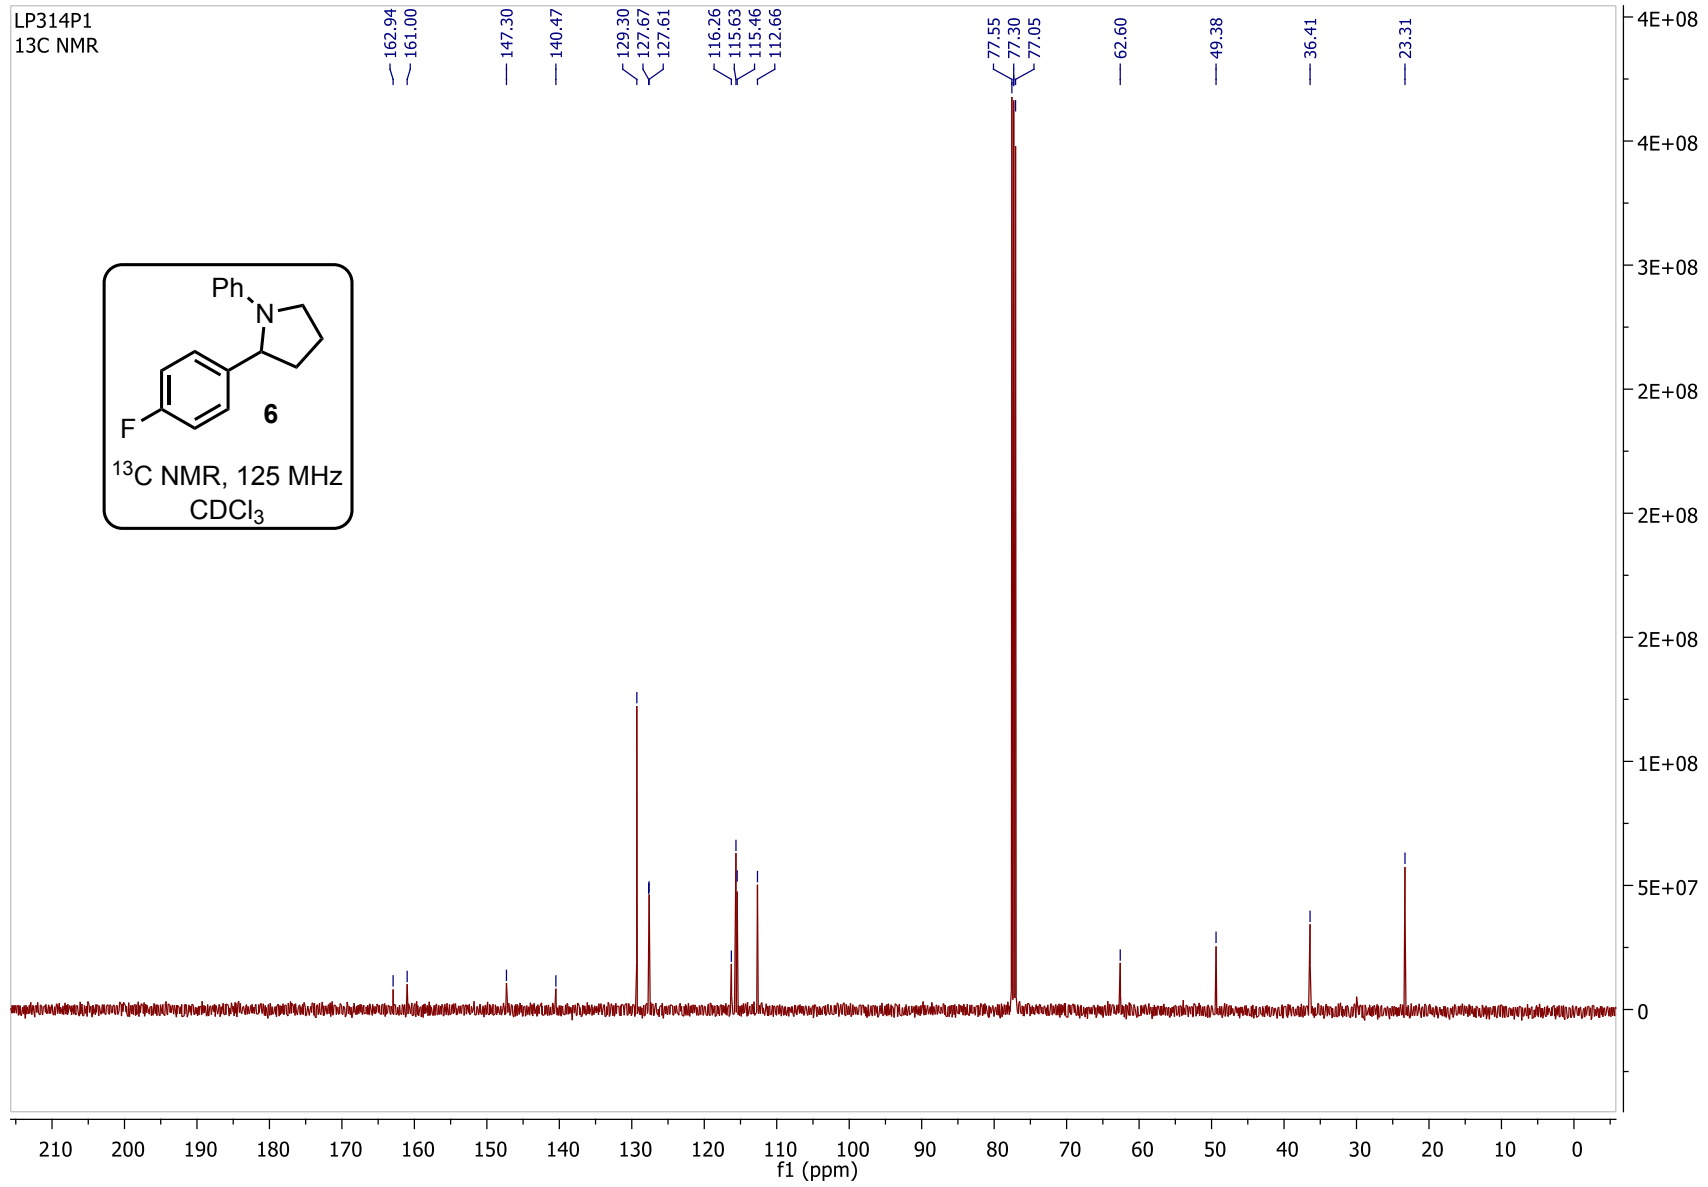

F19 NMR

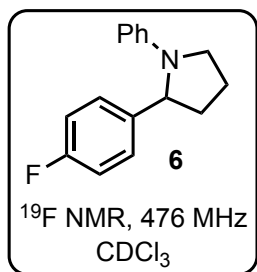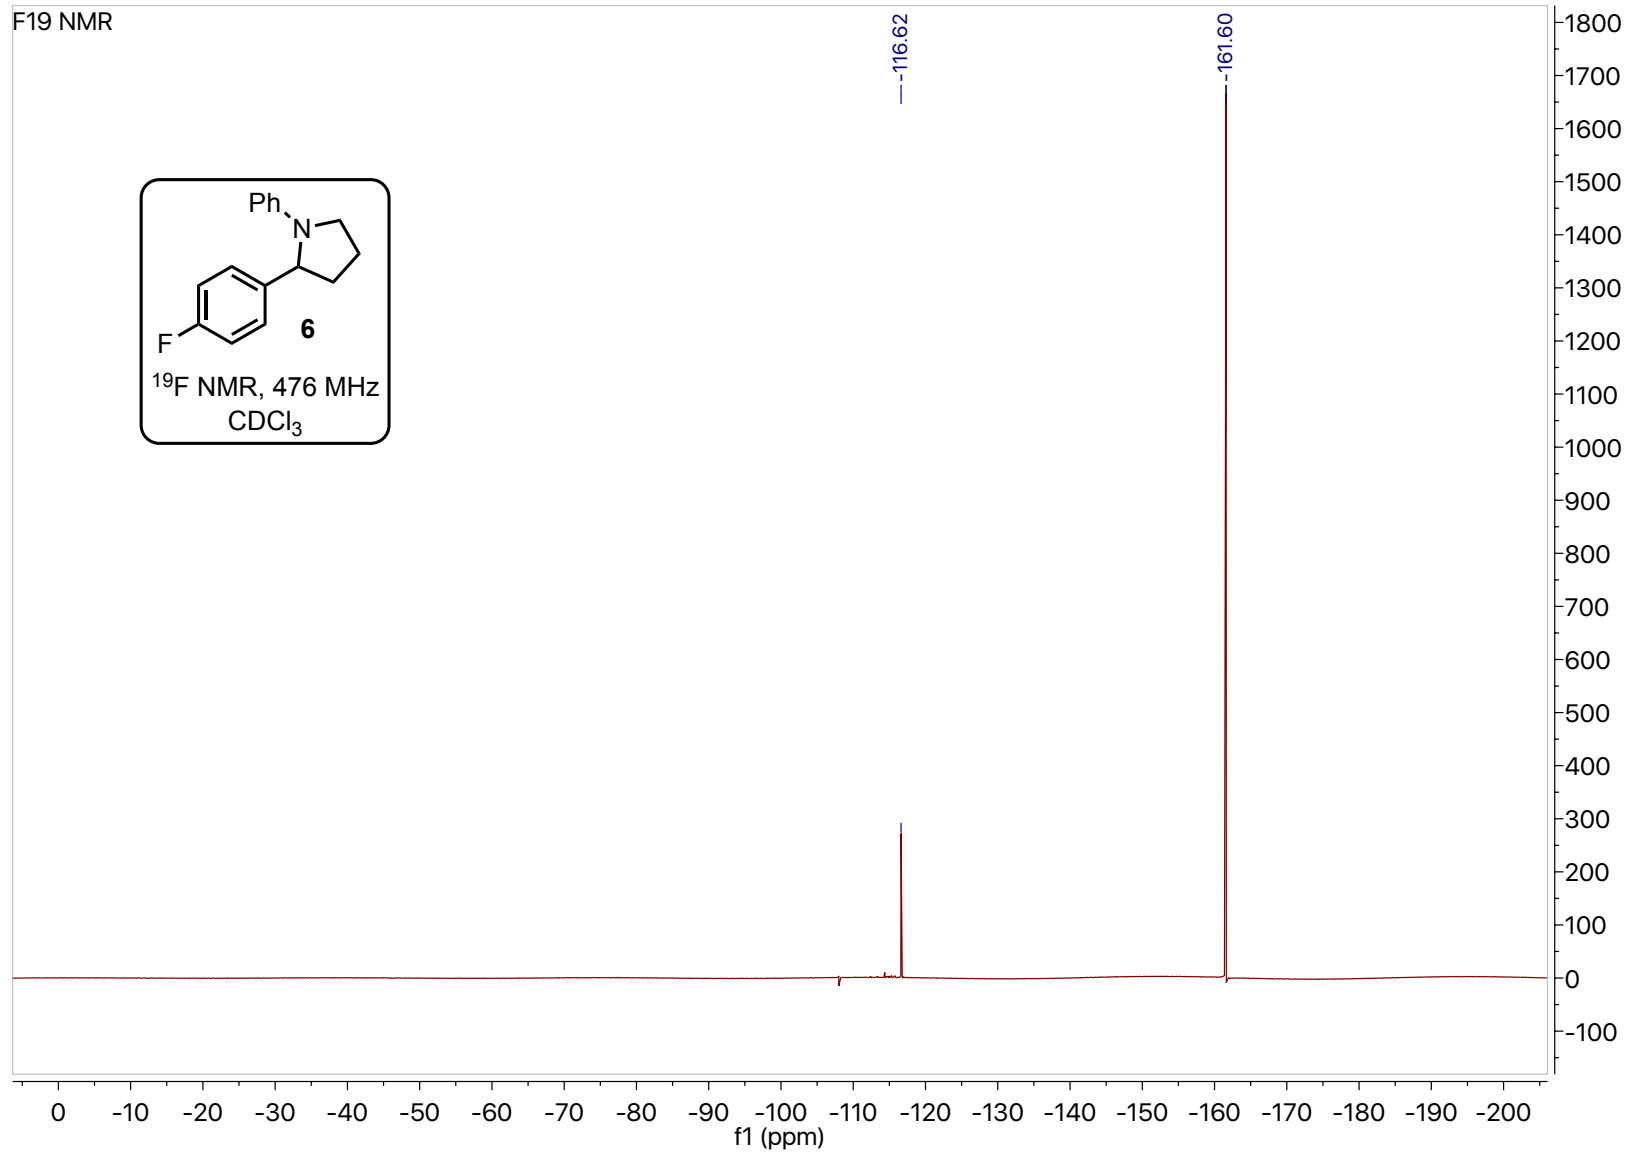

LP358P1  
1H NMR

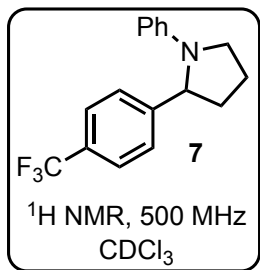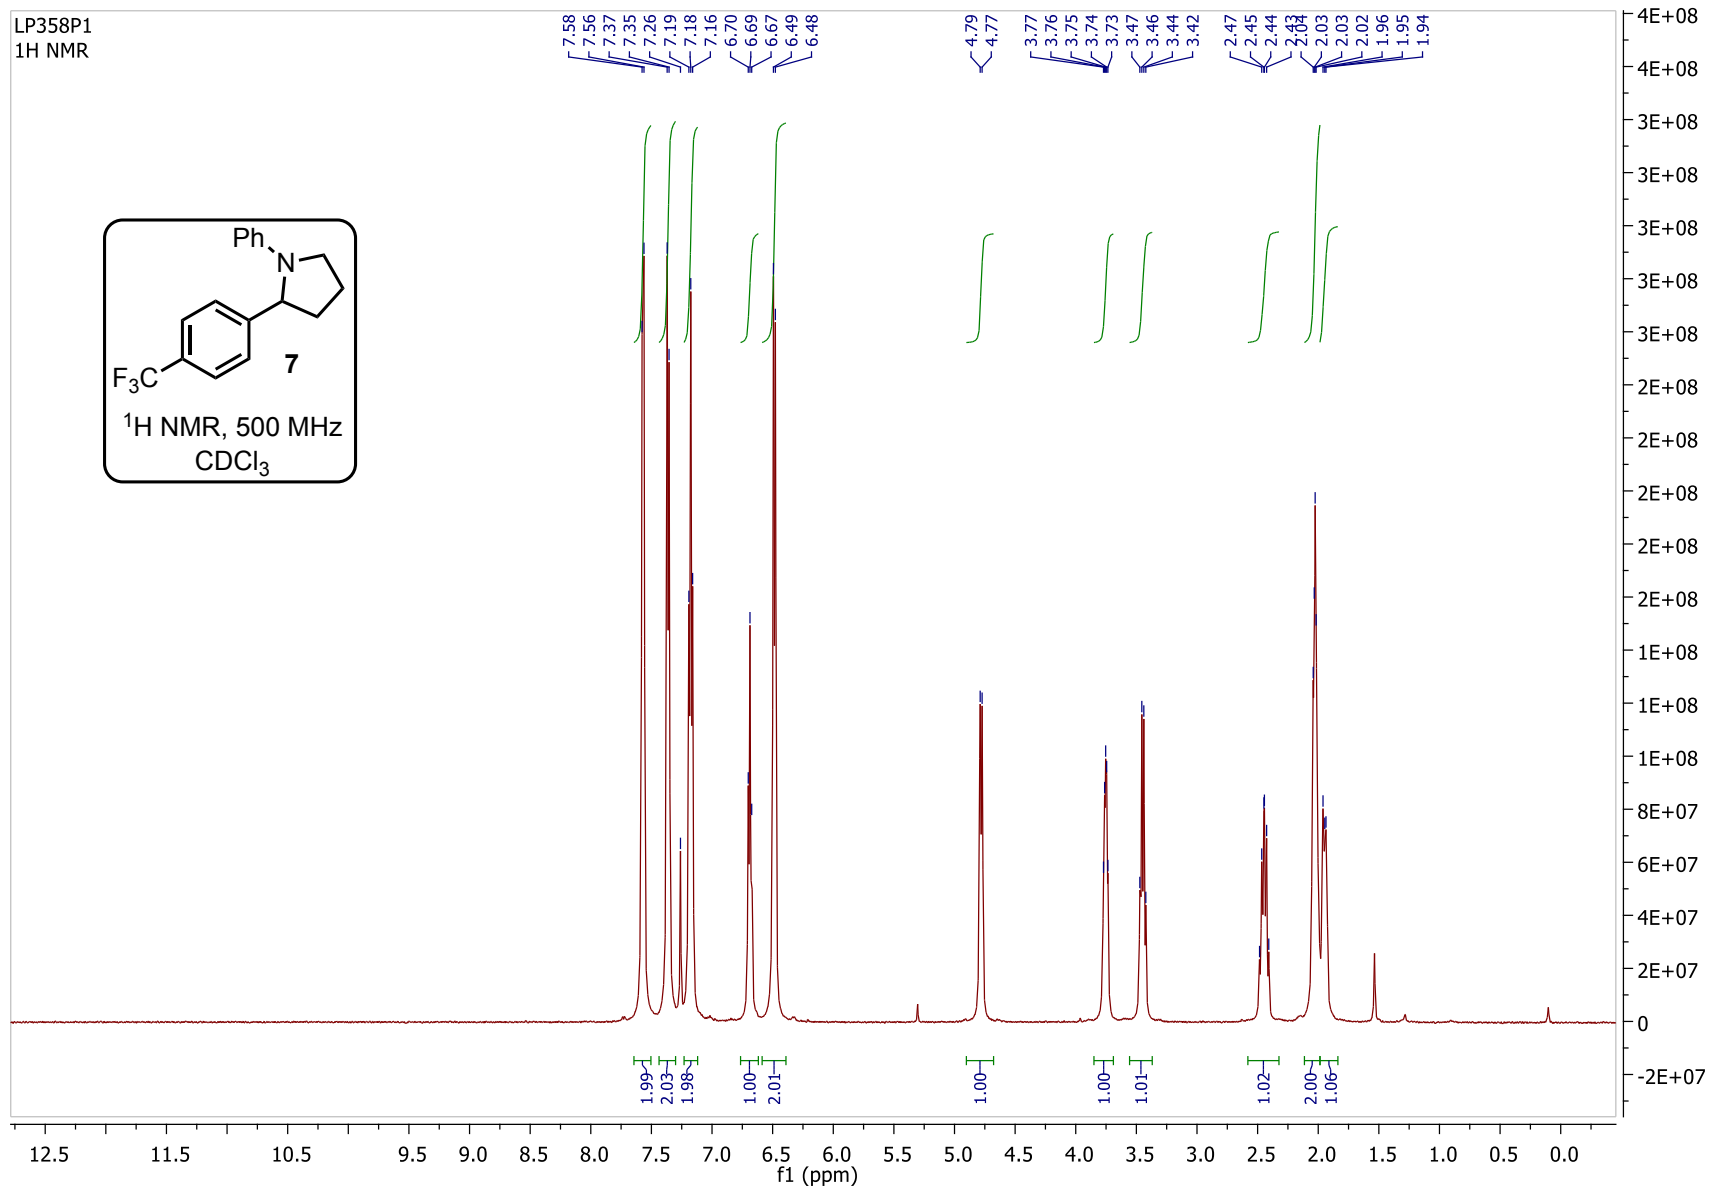

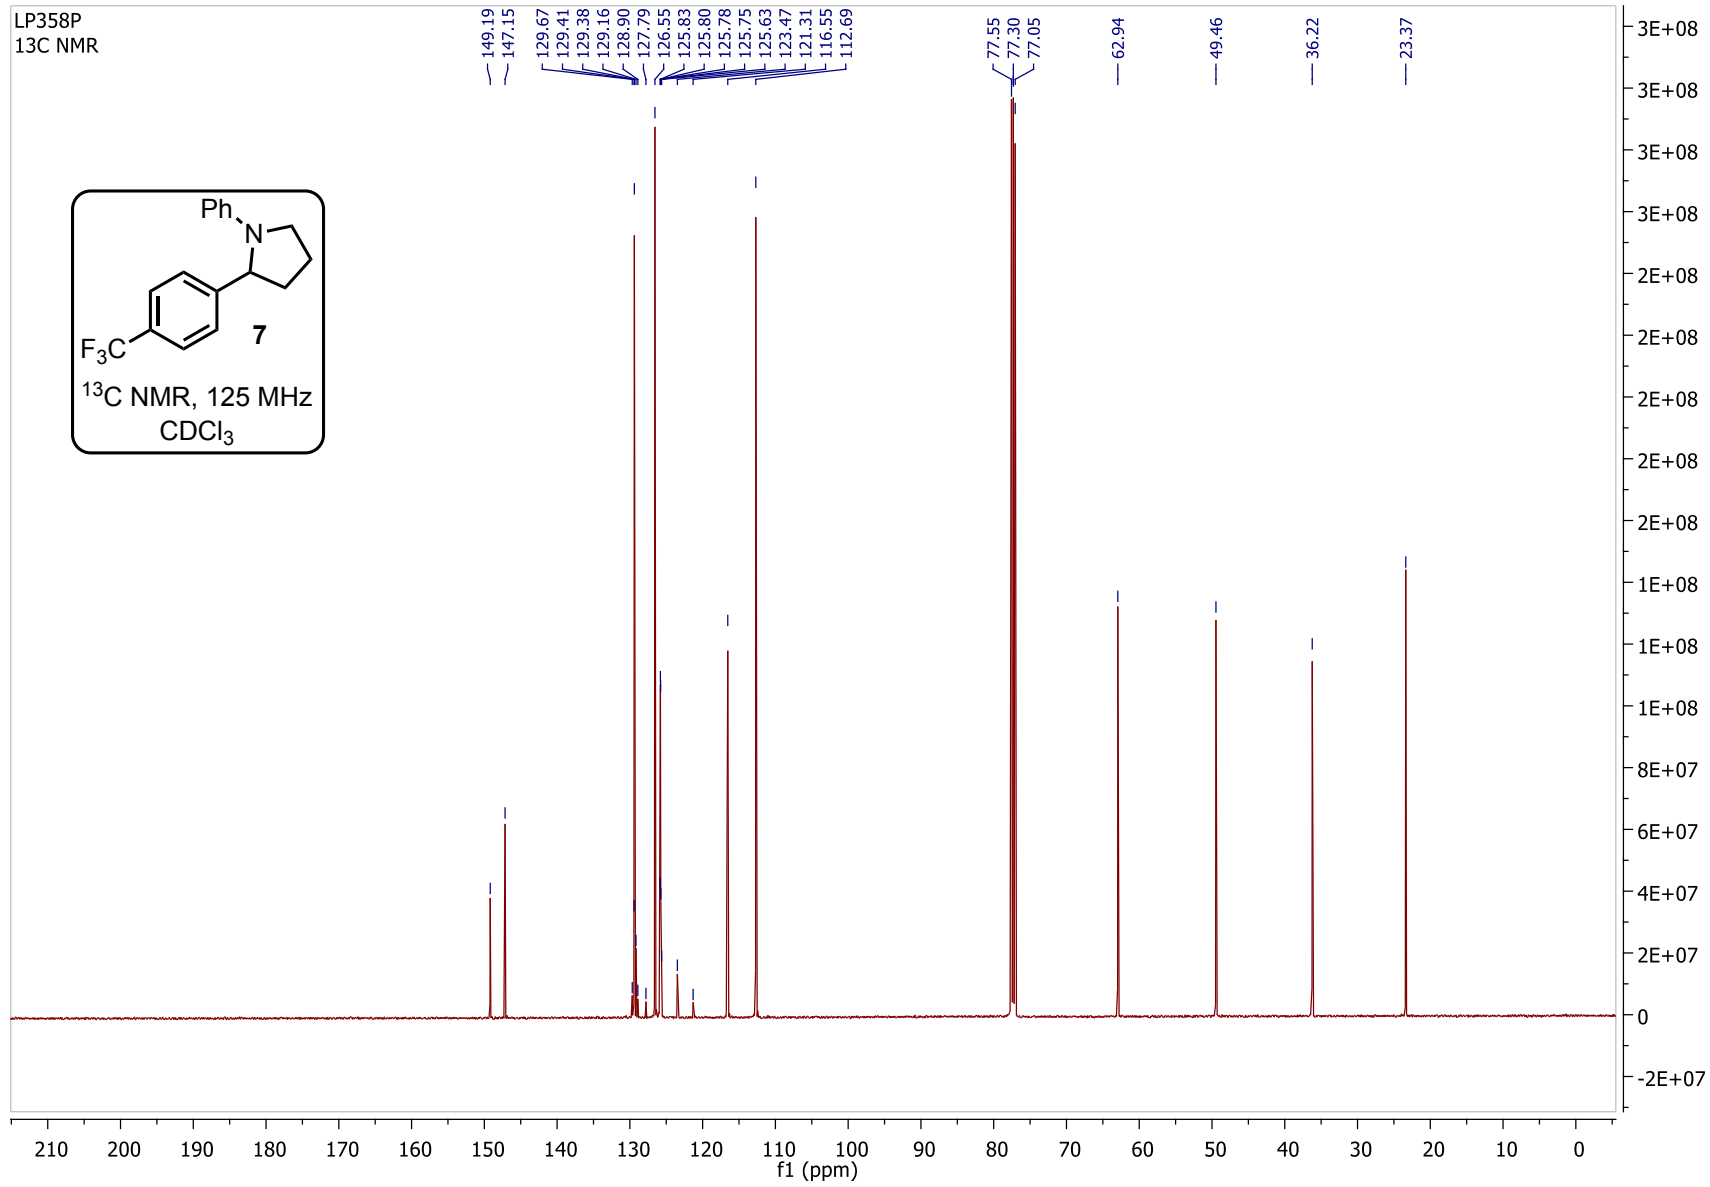



F19 NMR

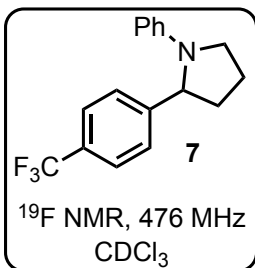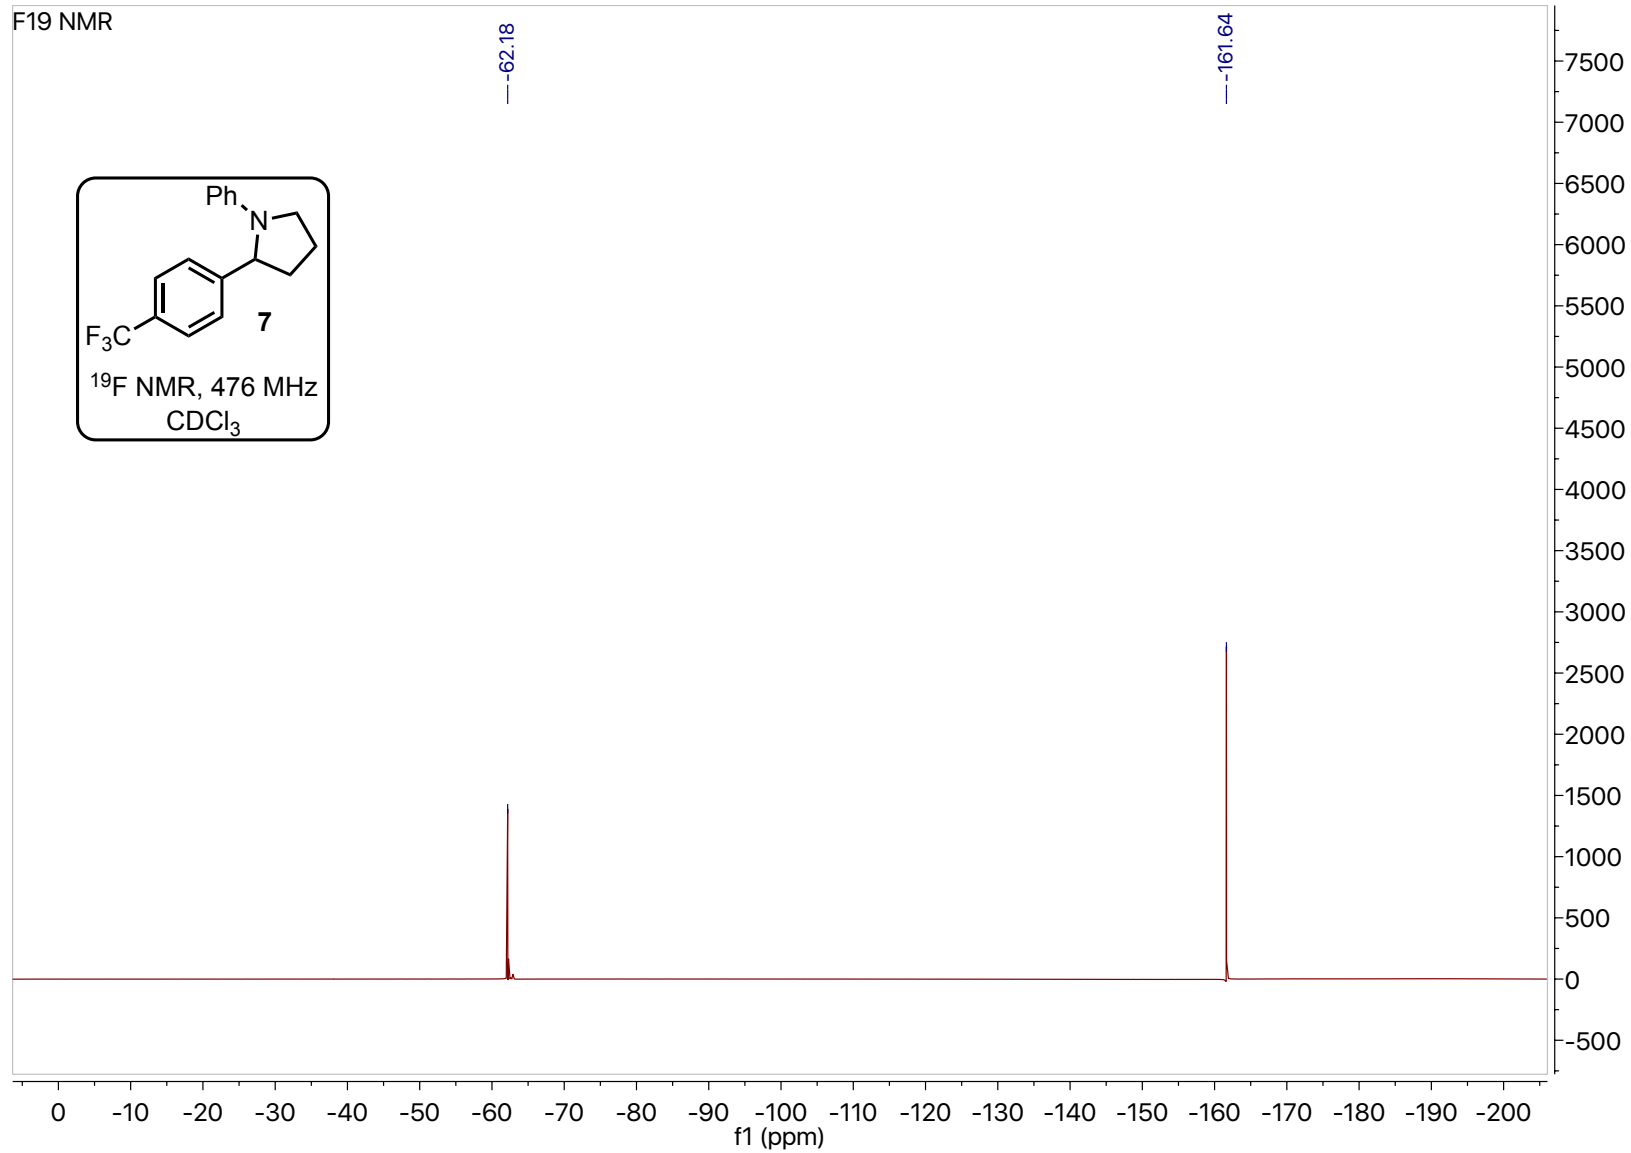

LP334P  
1H NMR

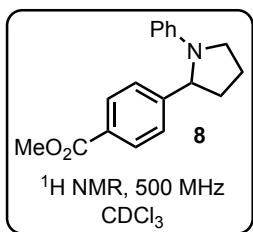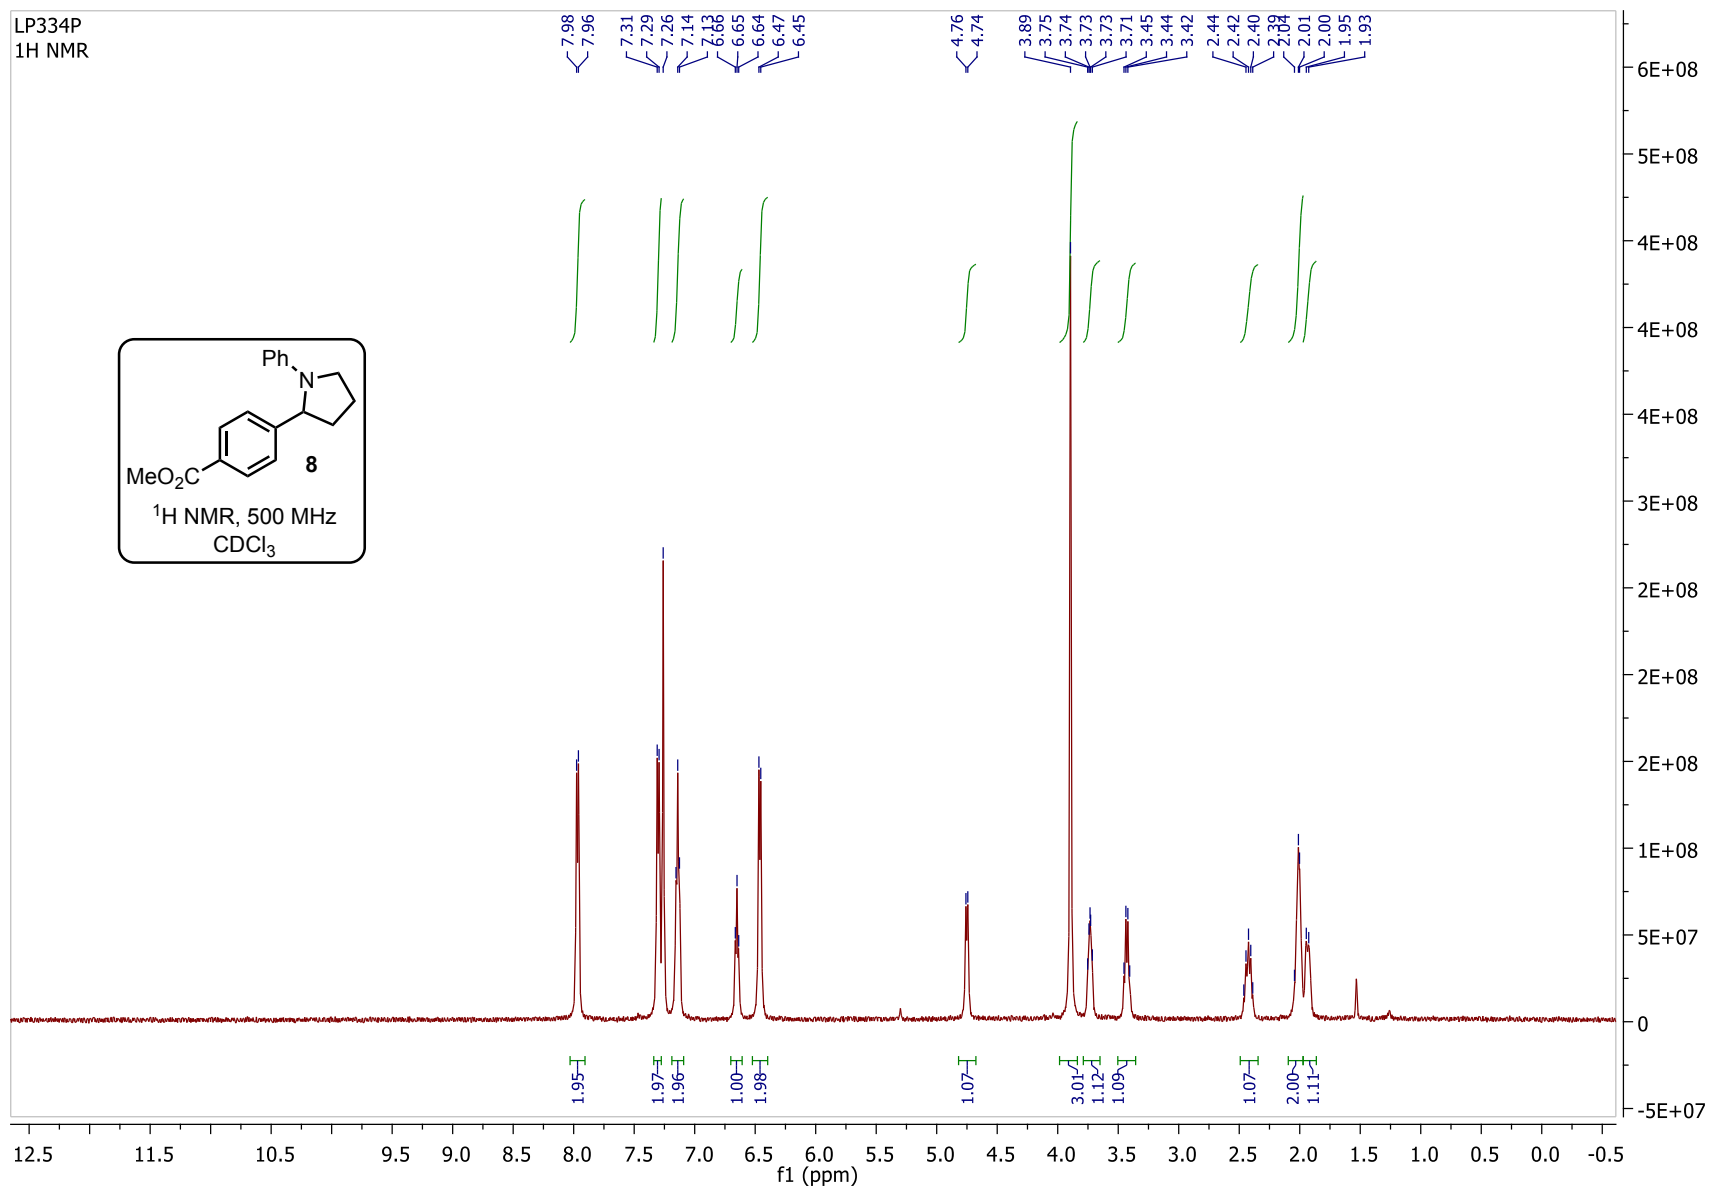

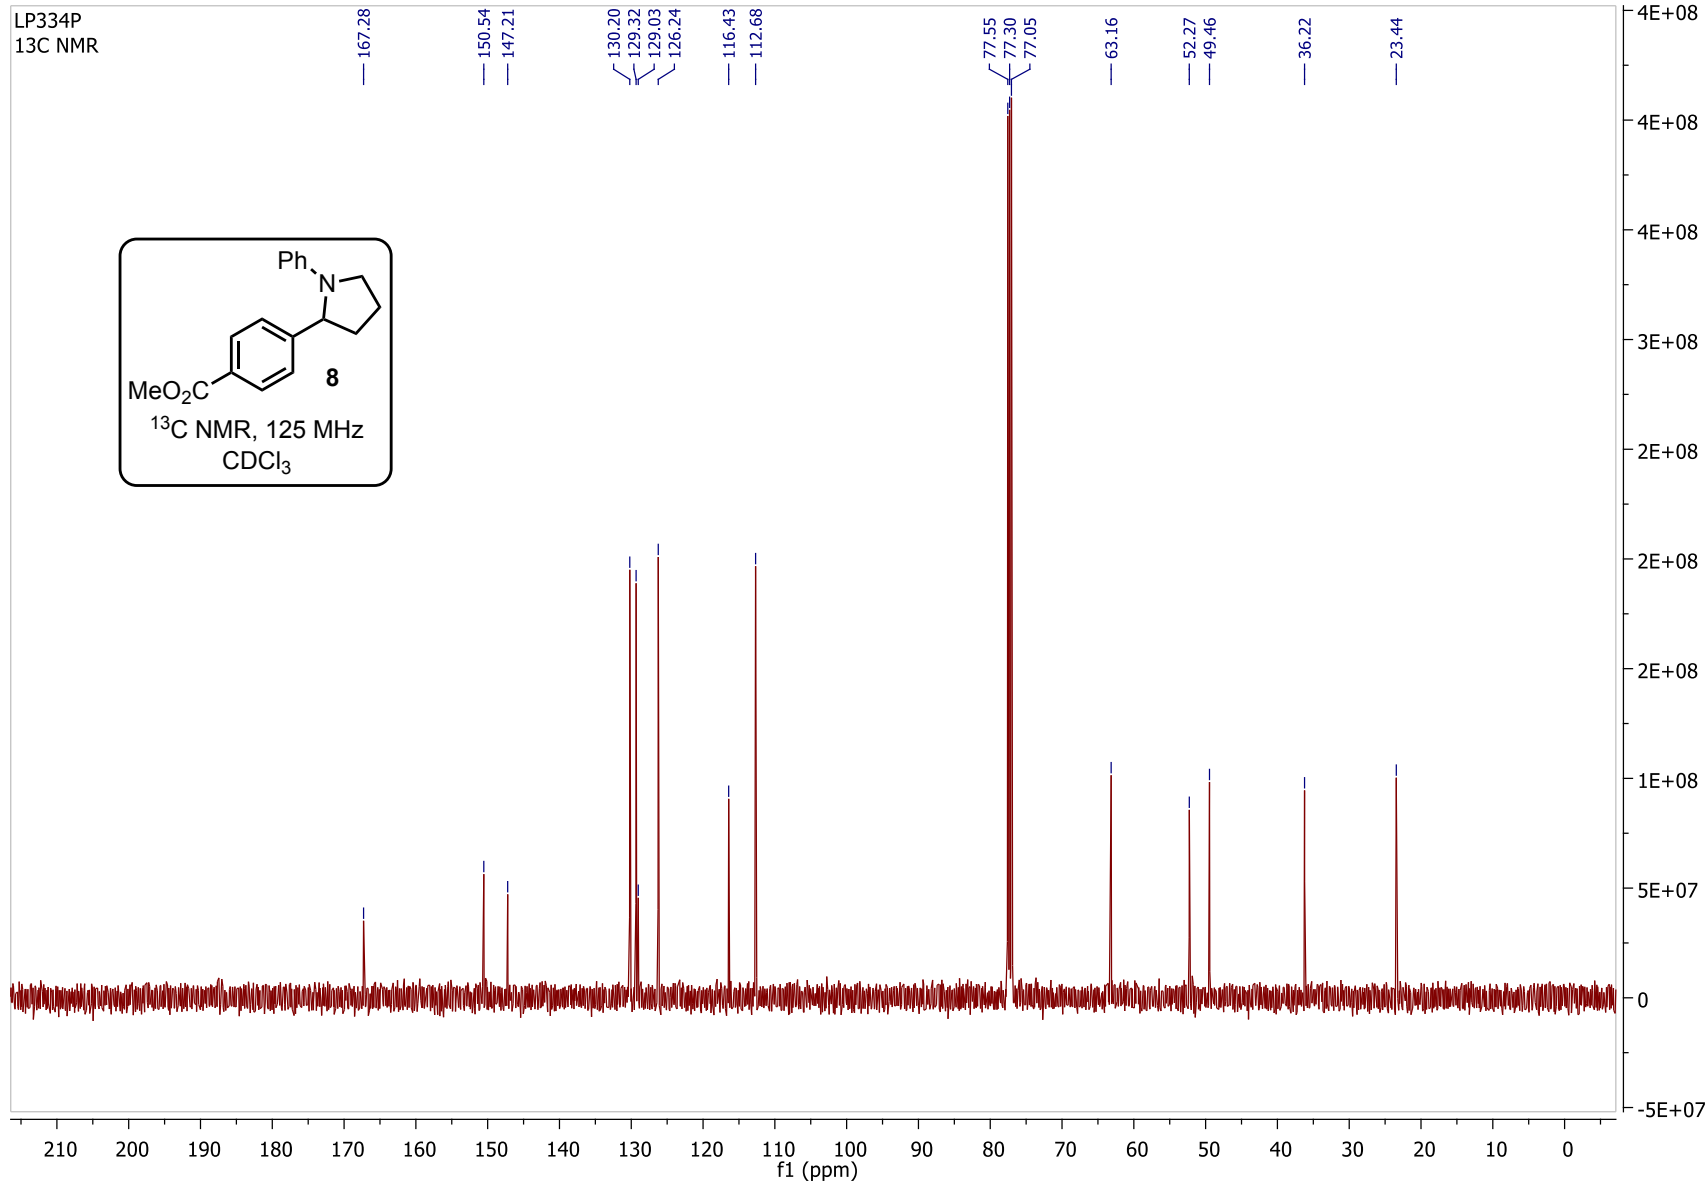

LP333P  
1H NMR

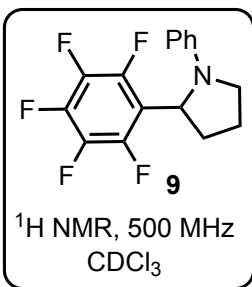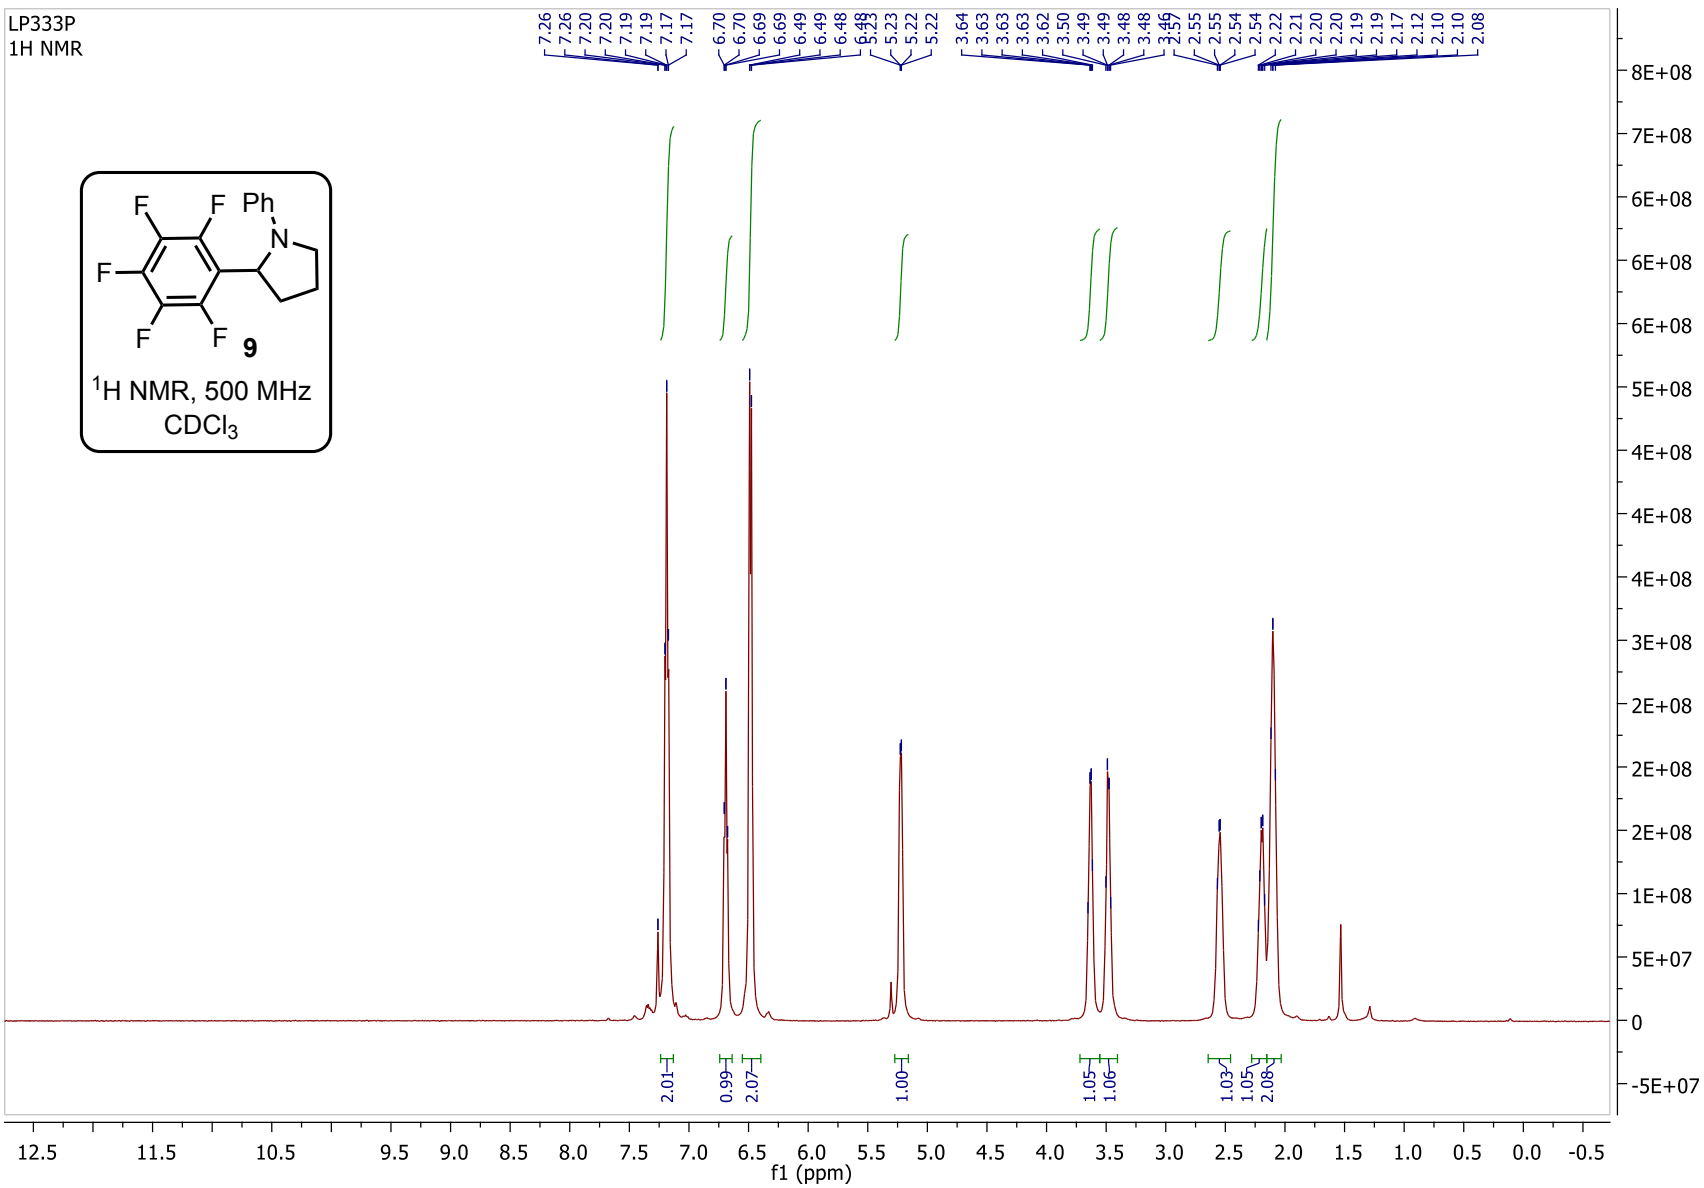

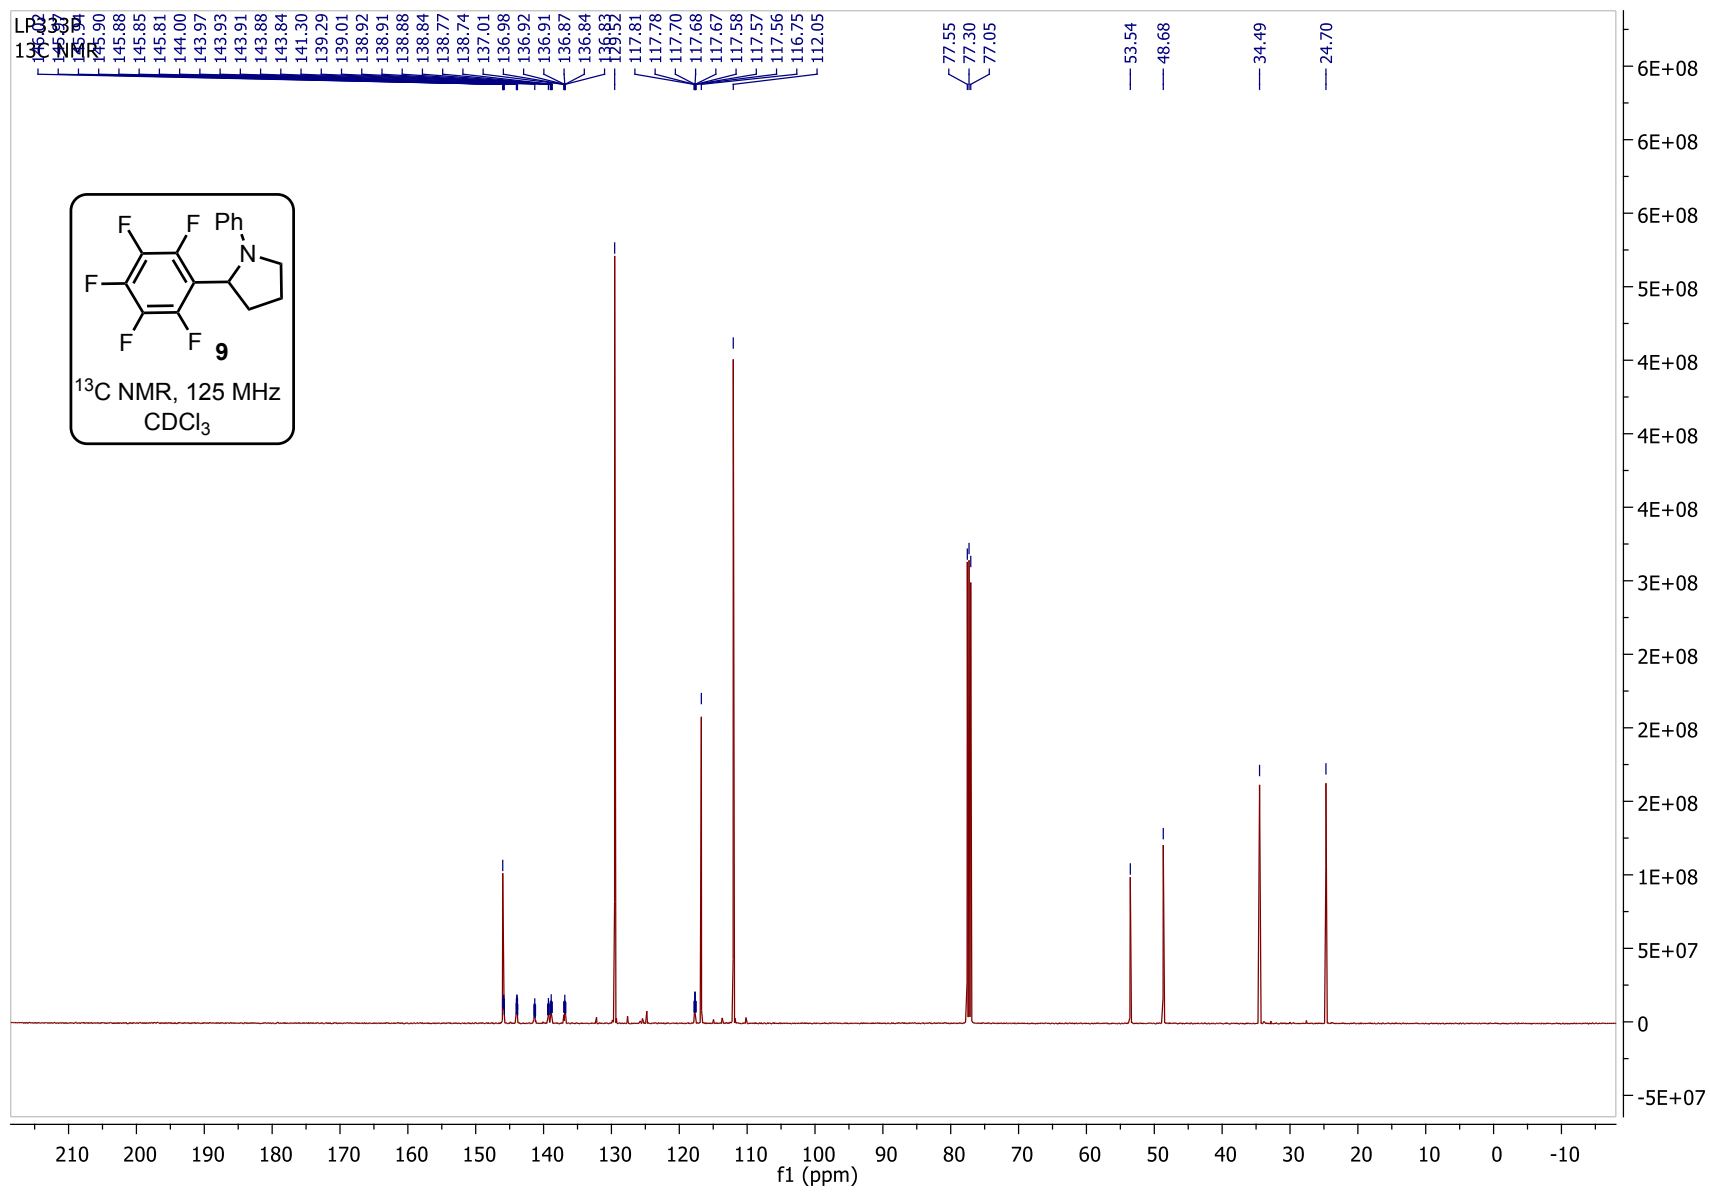

F19 NMR

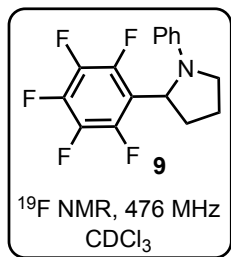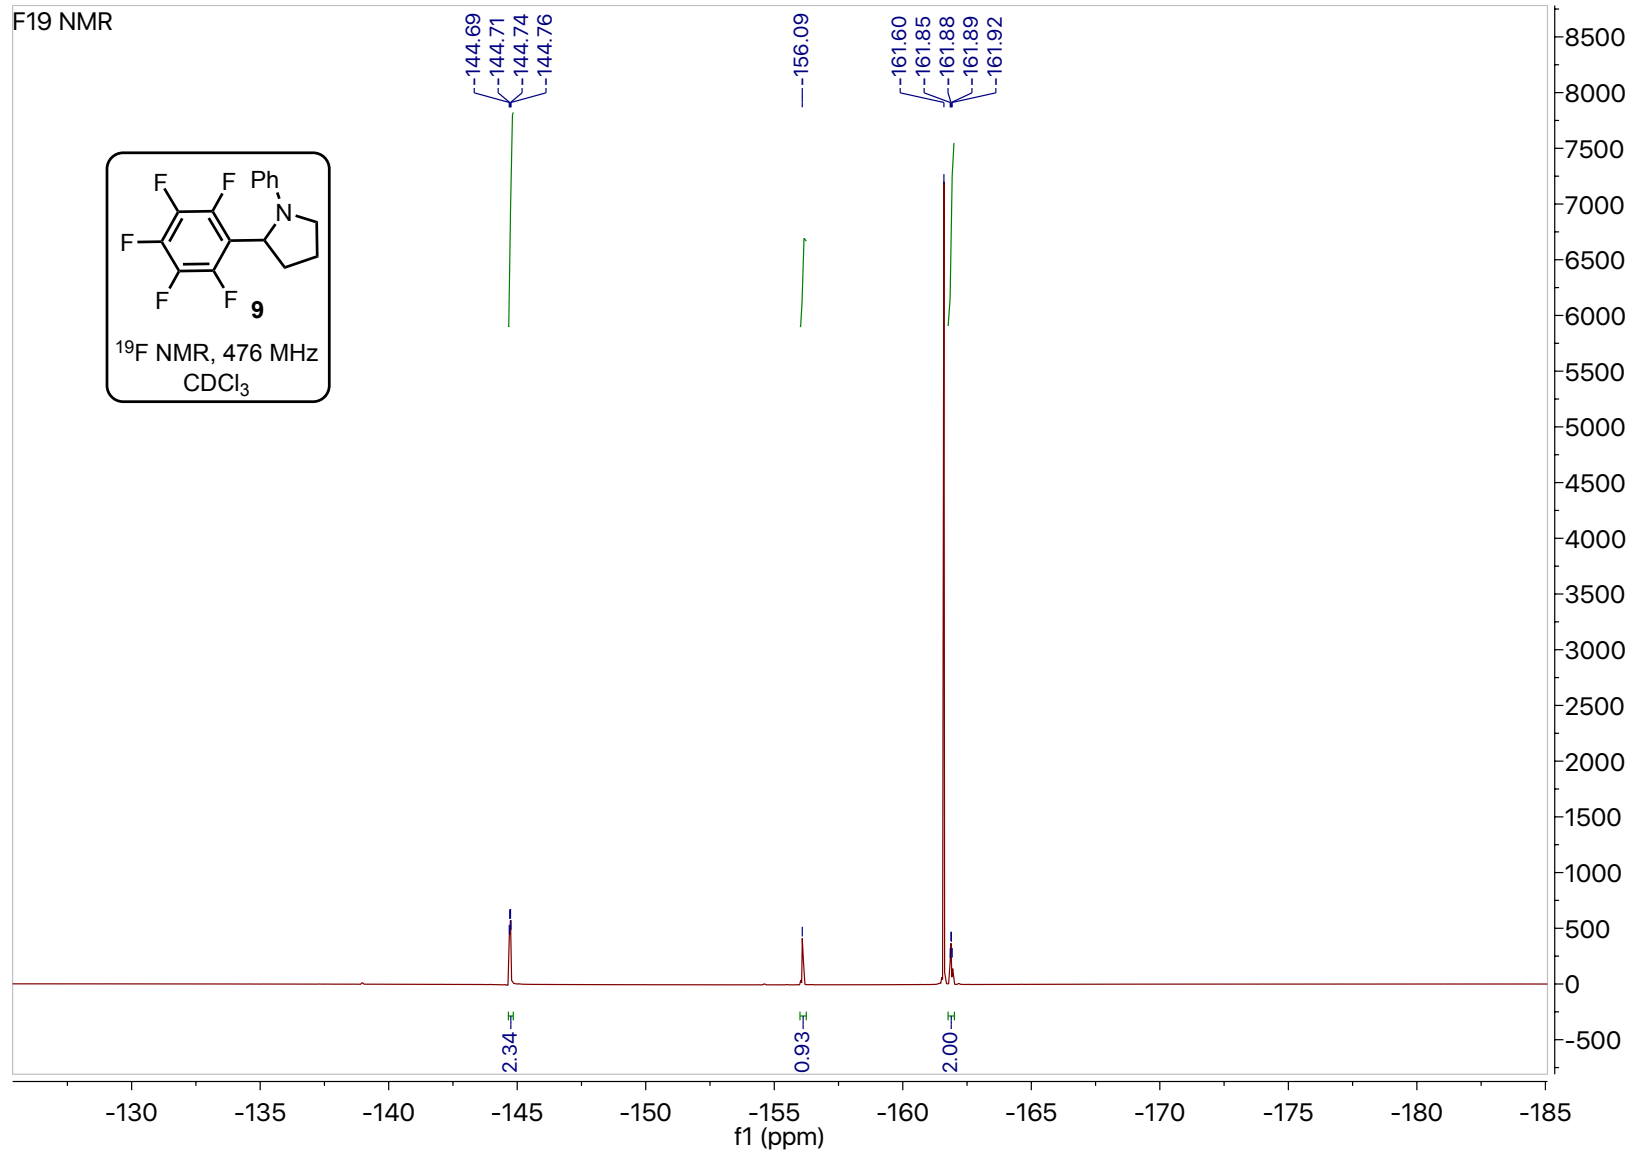

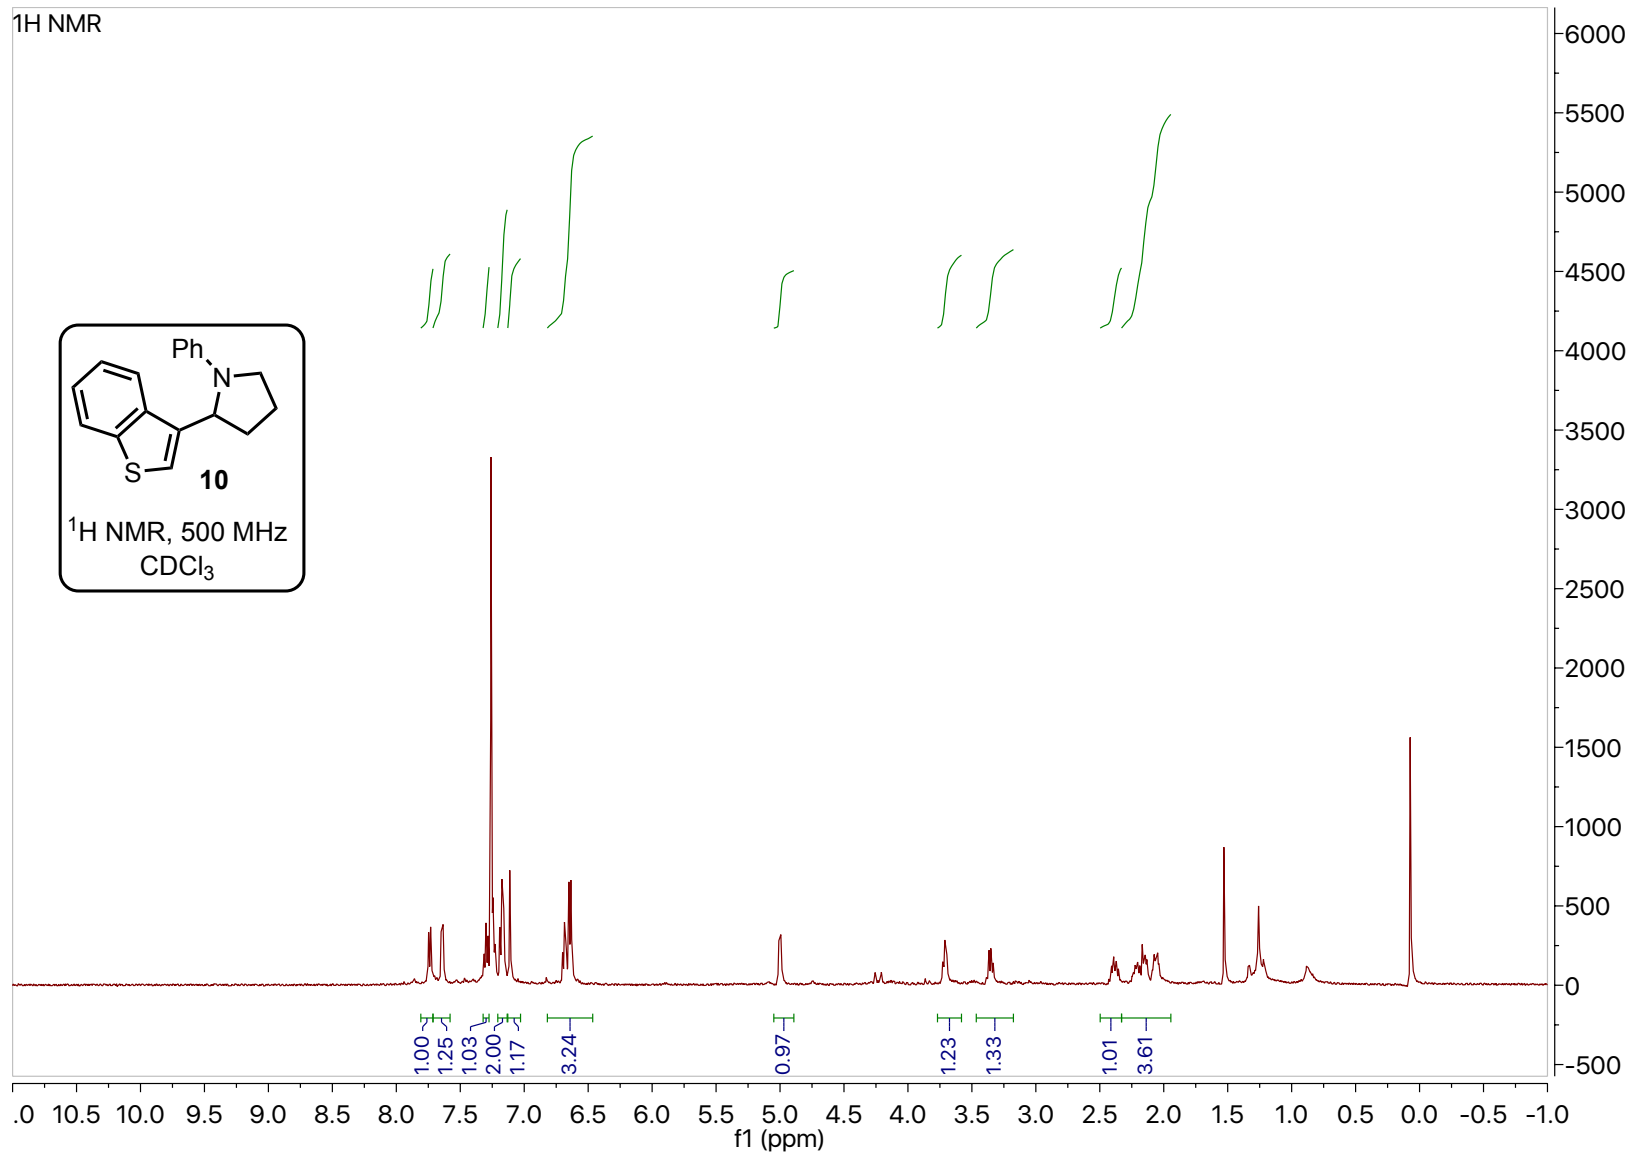

LP318P  
13C NMR

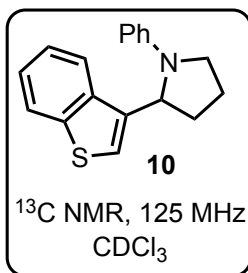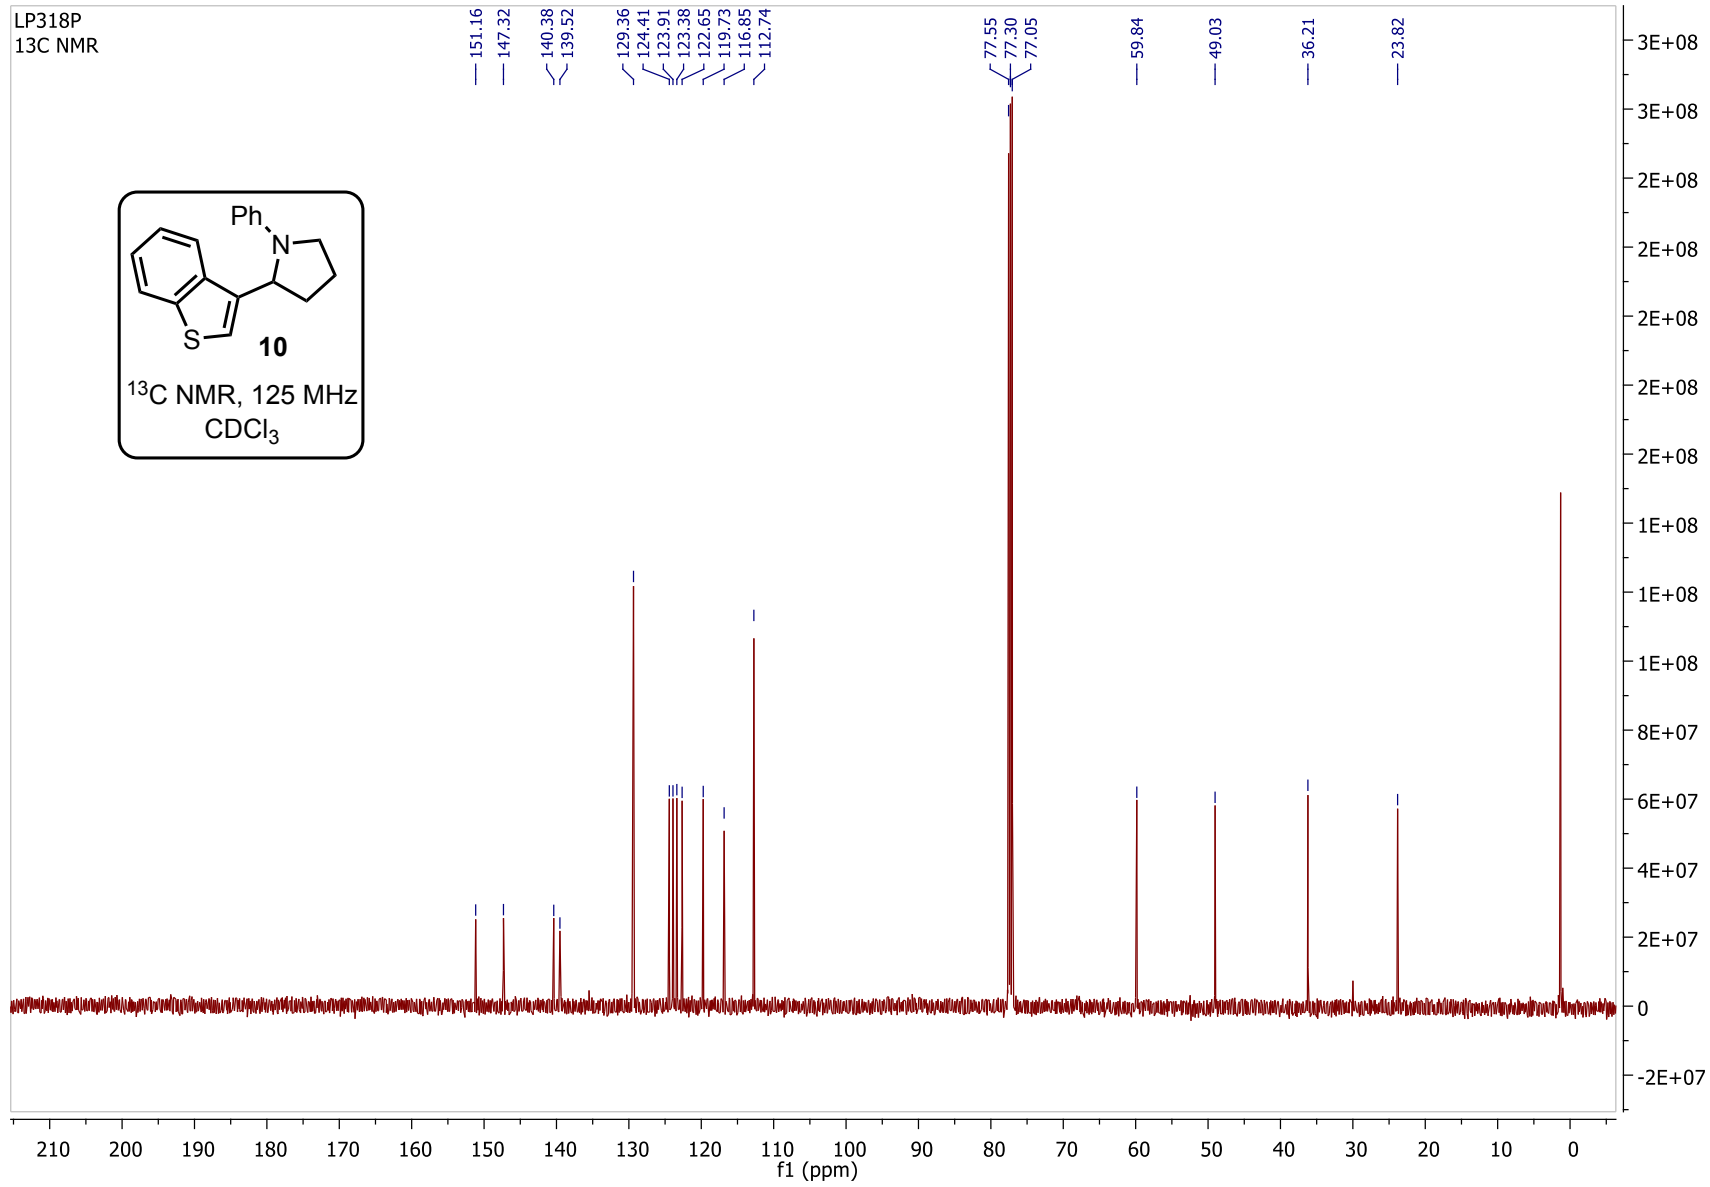



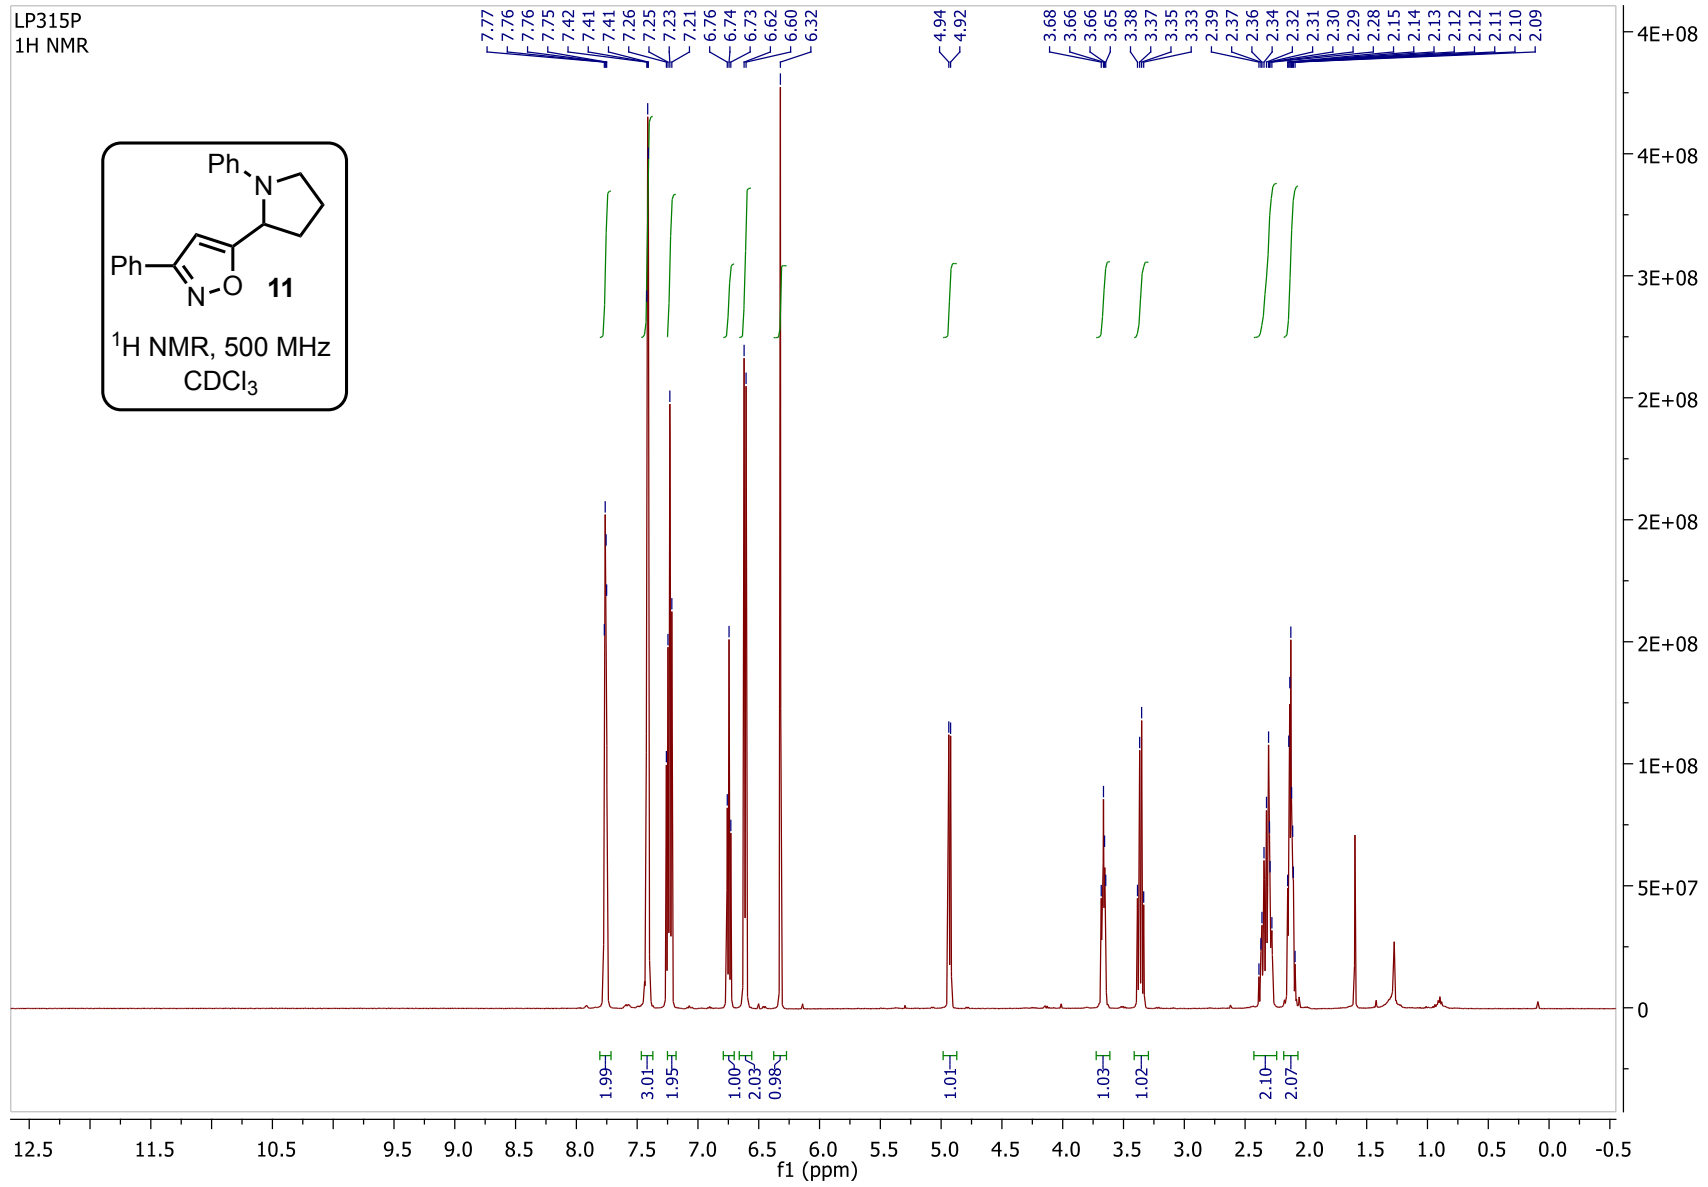

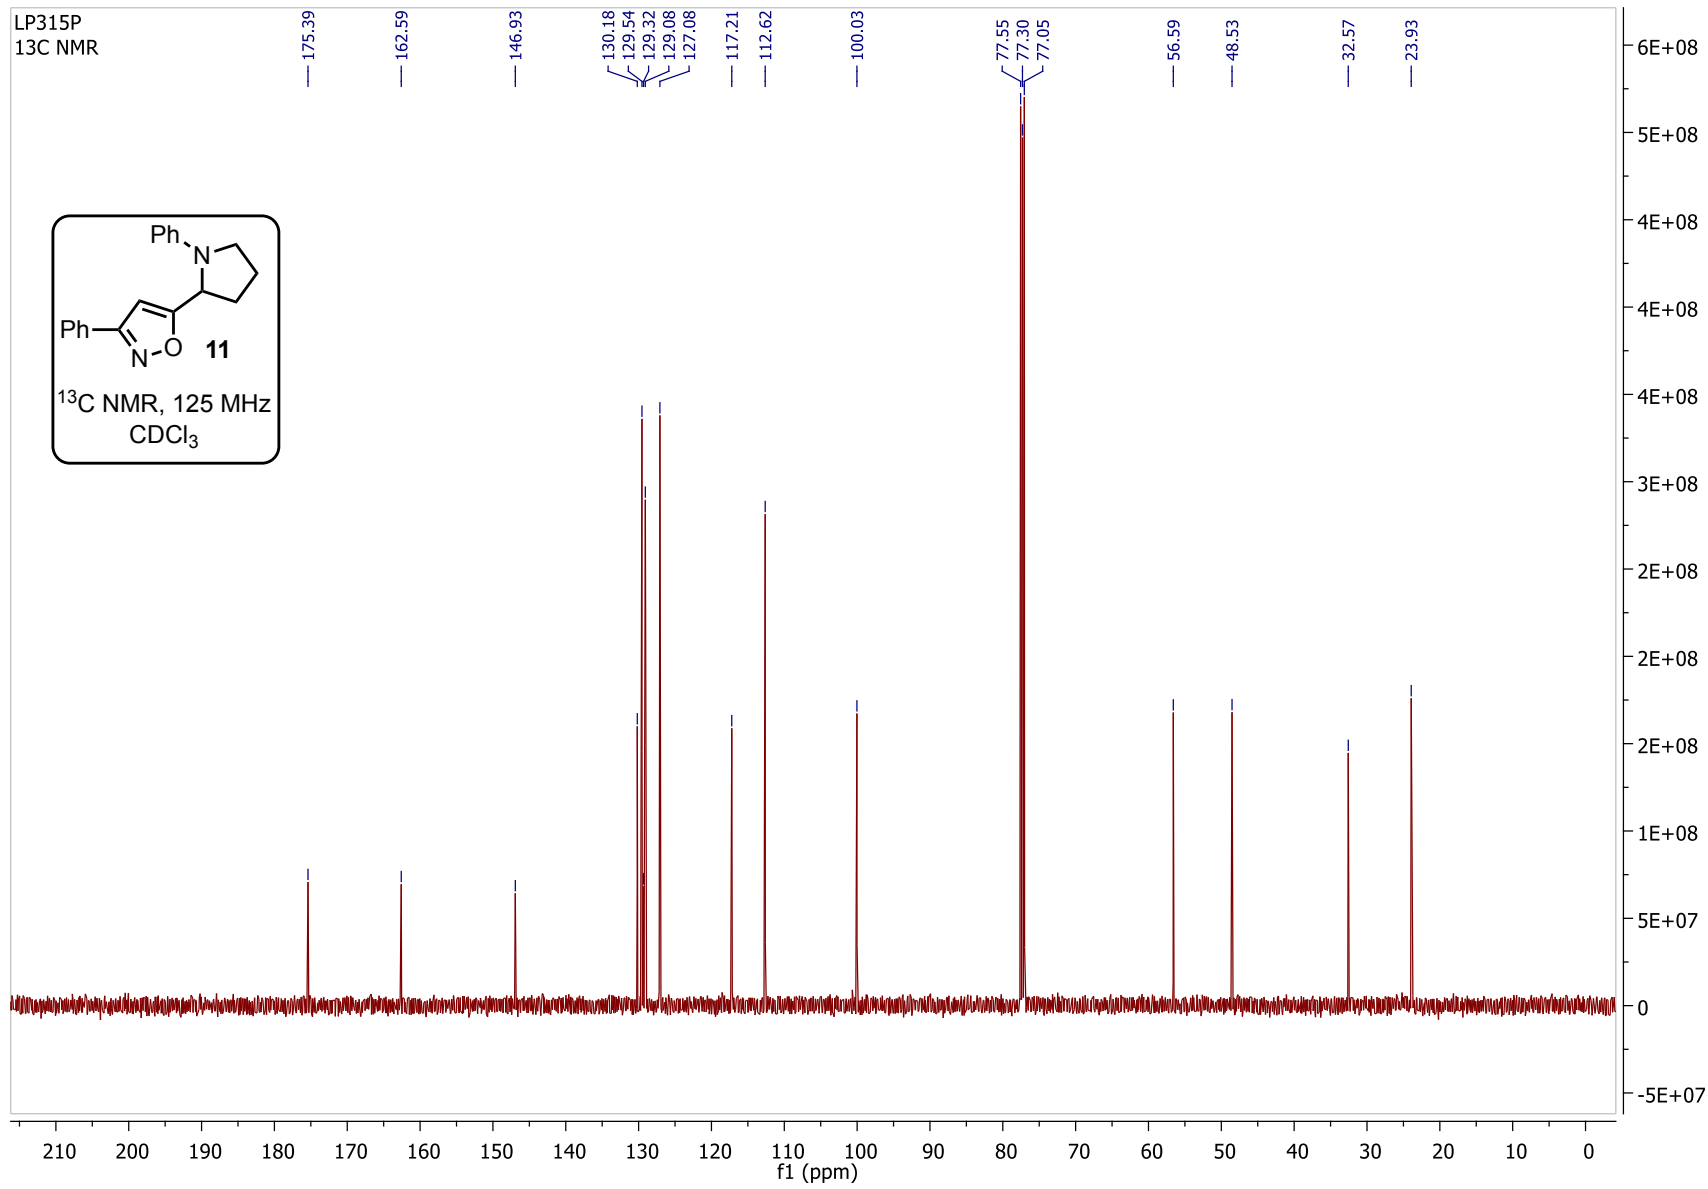

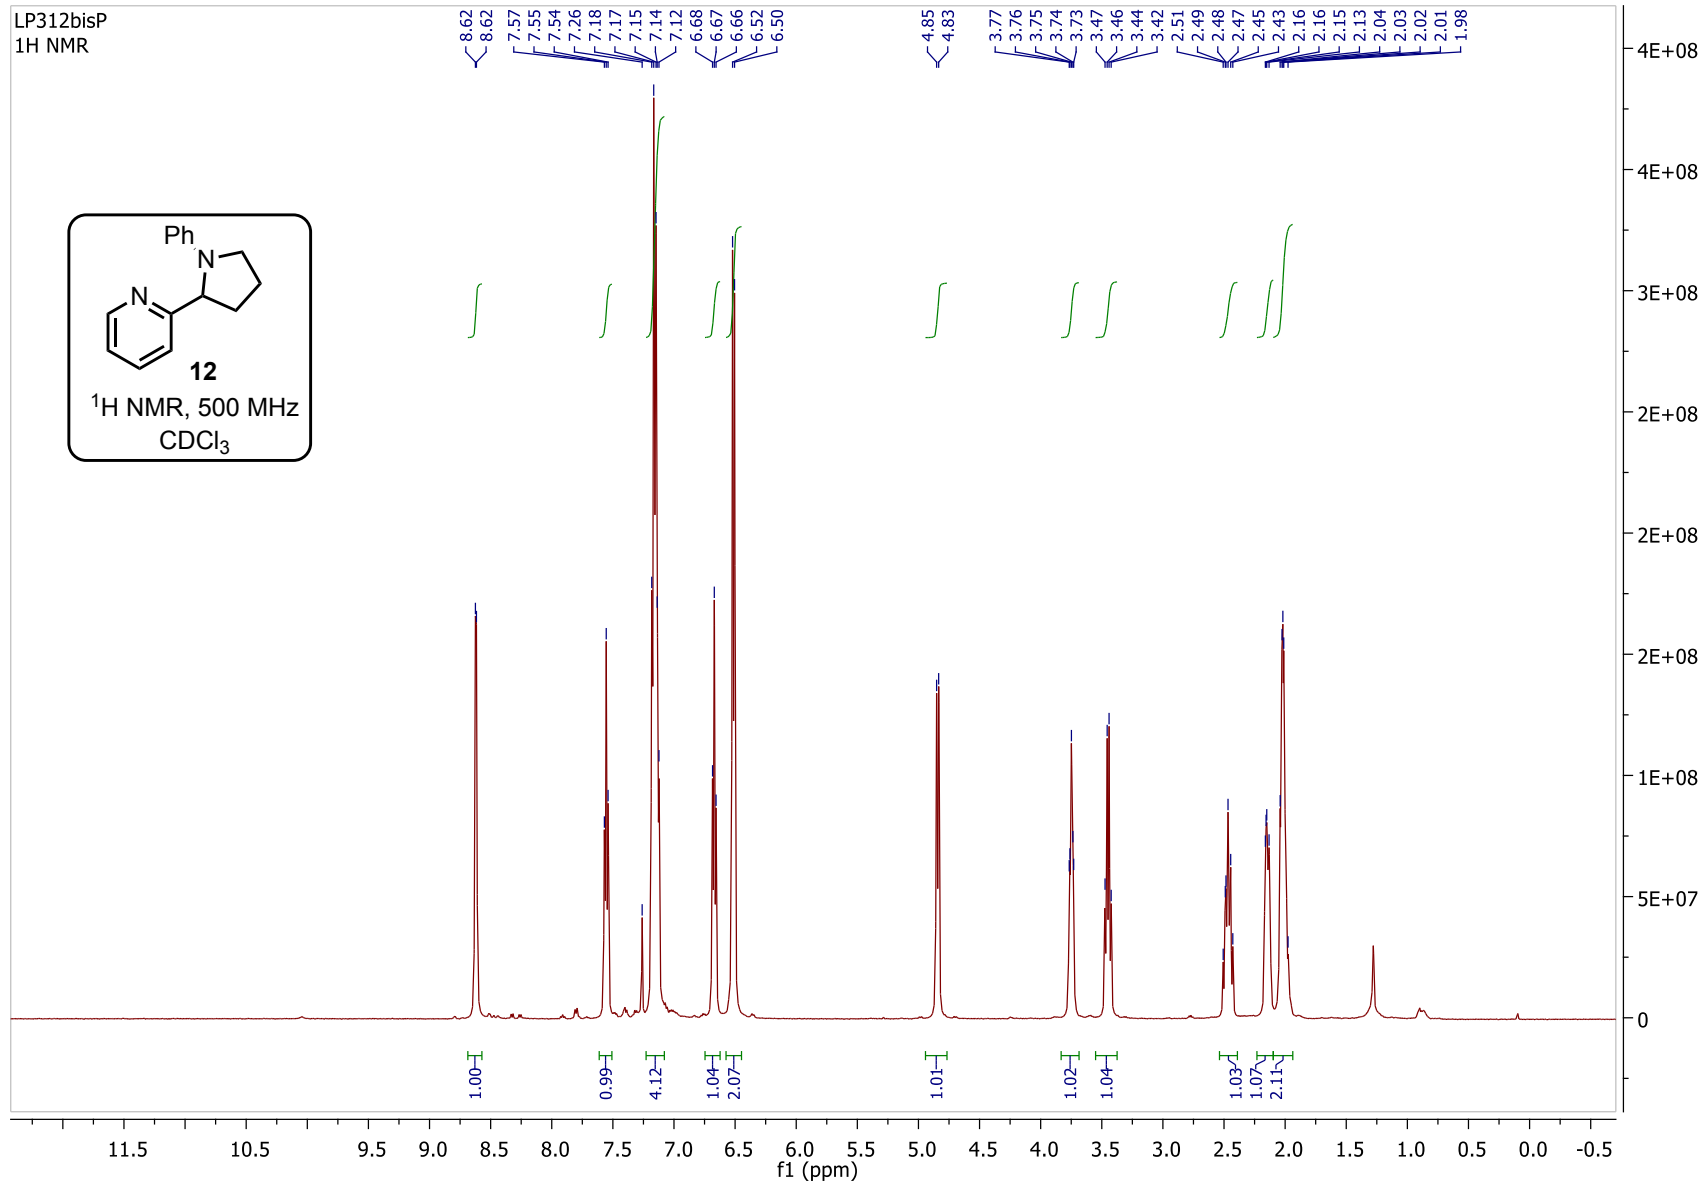

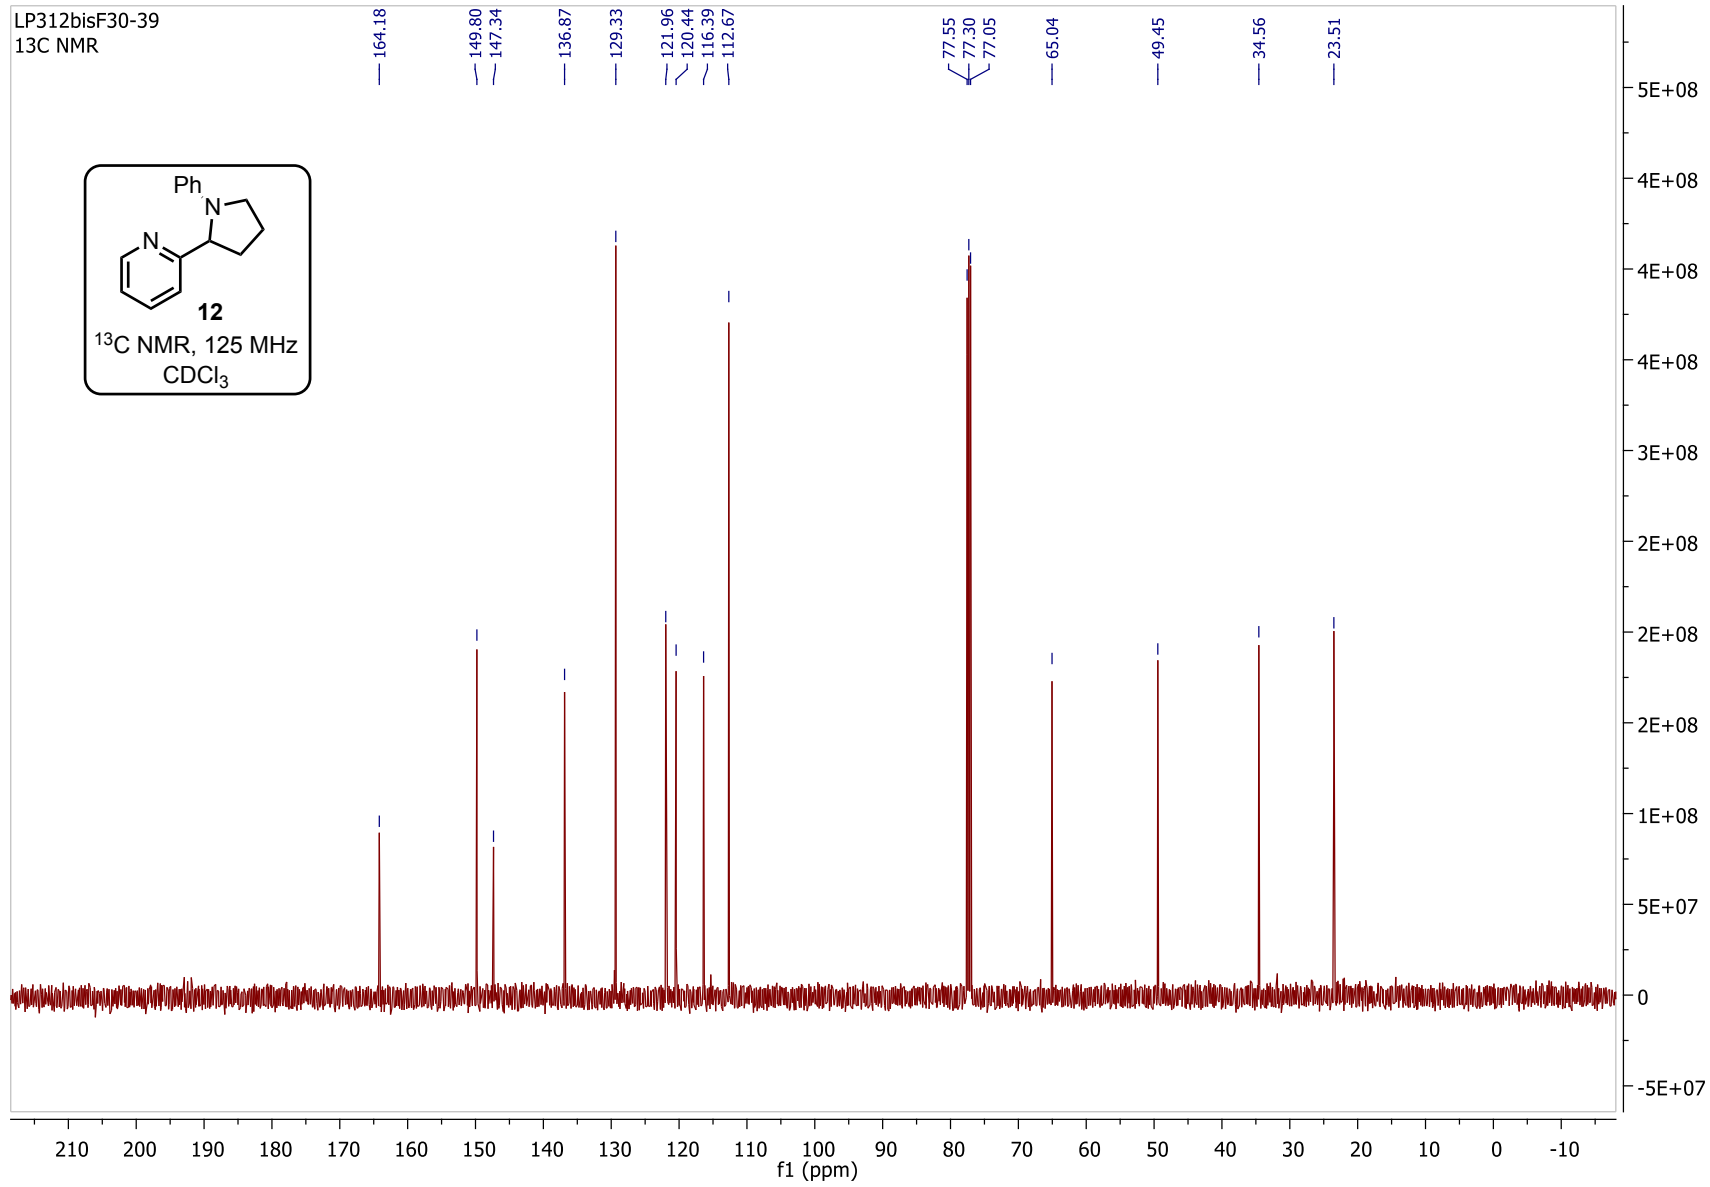

LP294P  
1H NMR

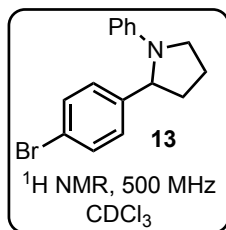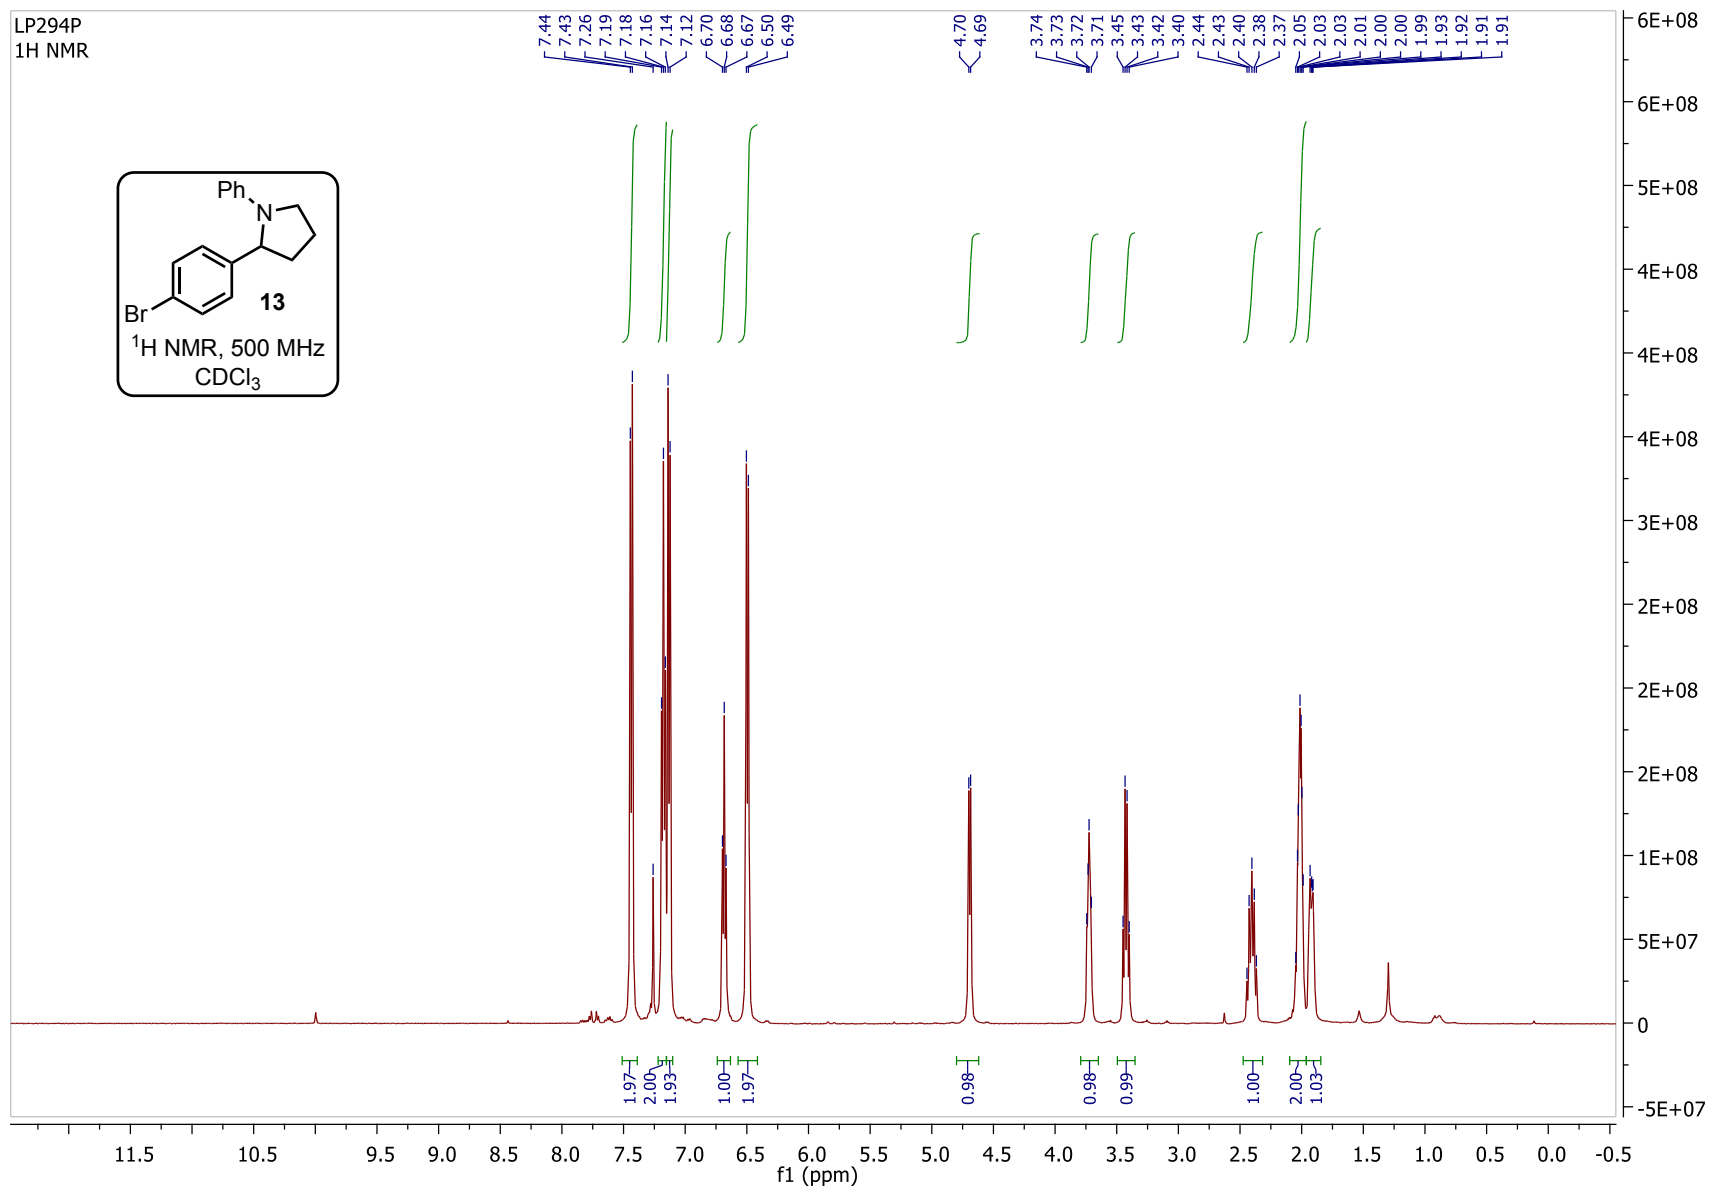

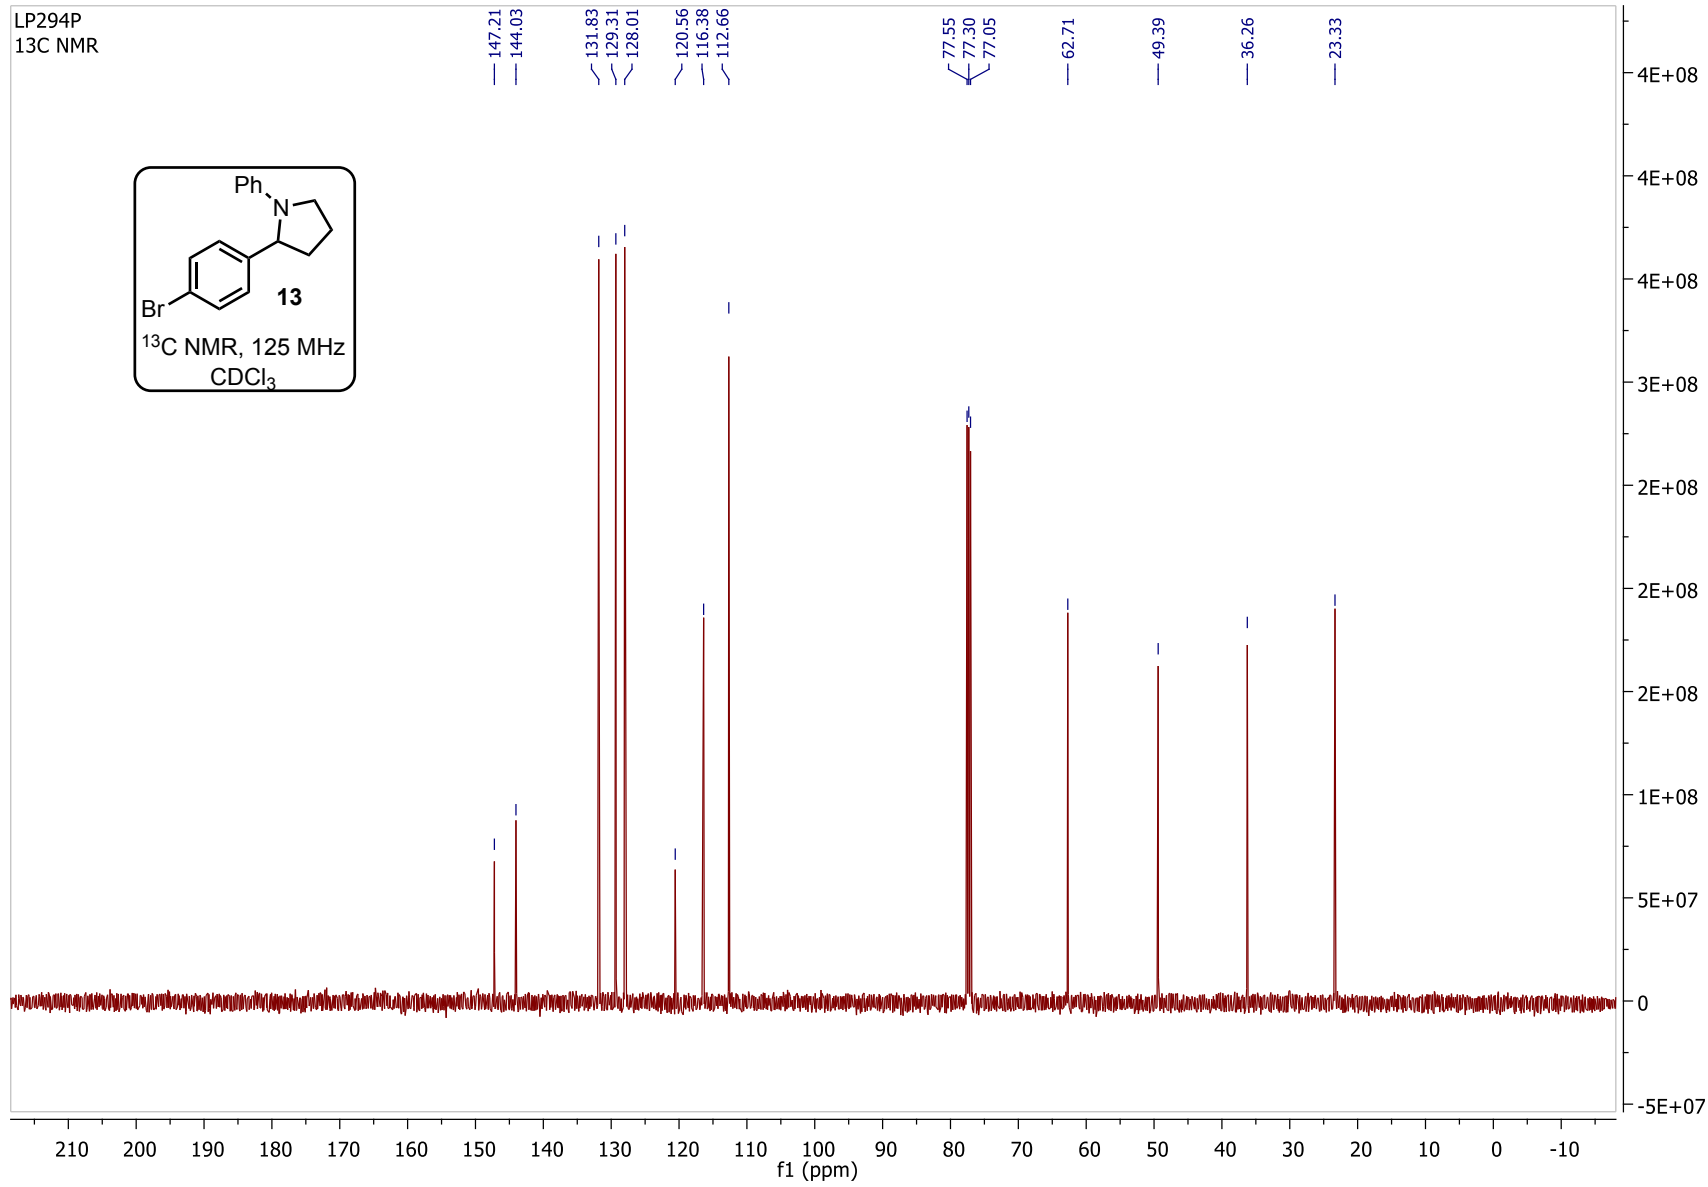

LP302P  
1H NMR

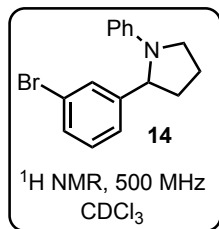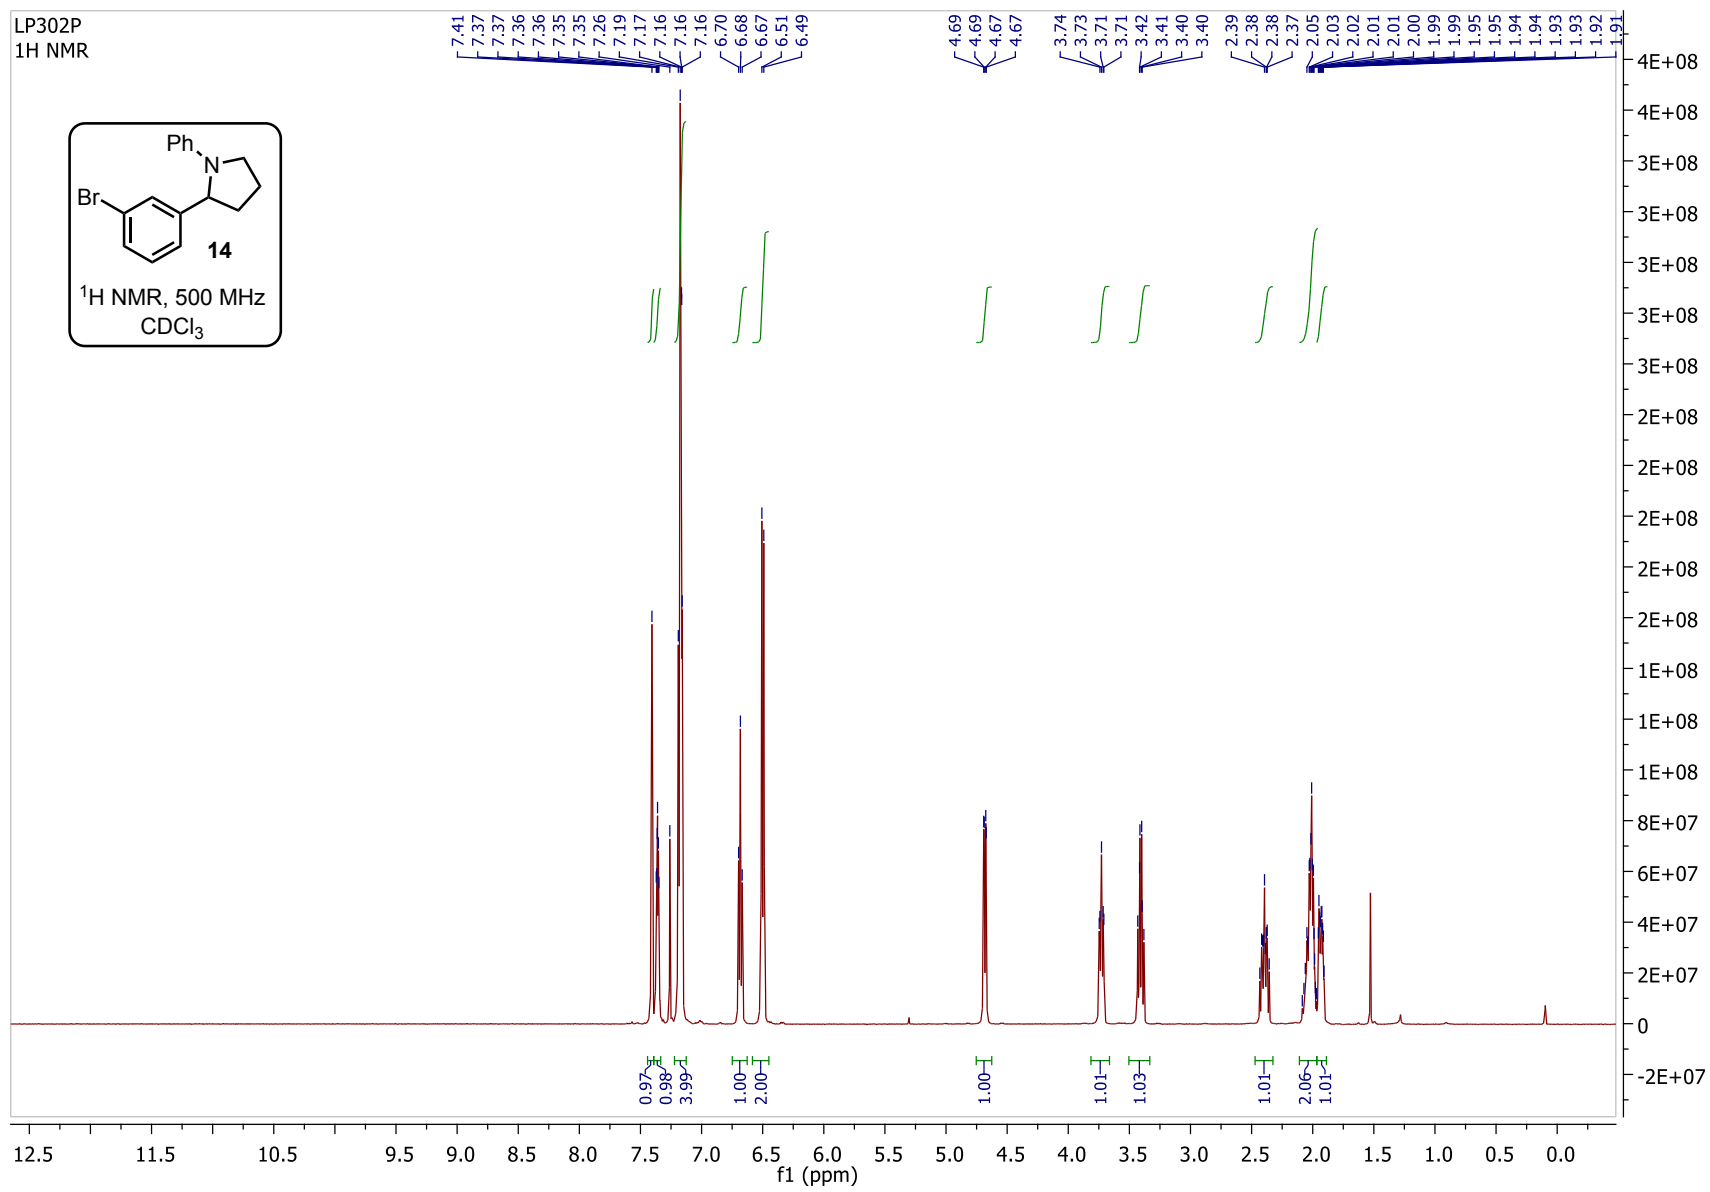

LP302P  
13C NMR

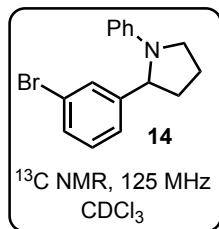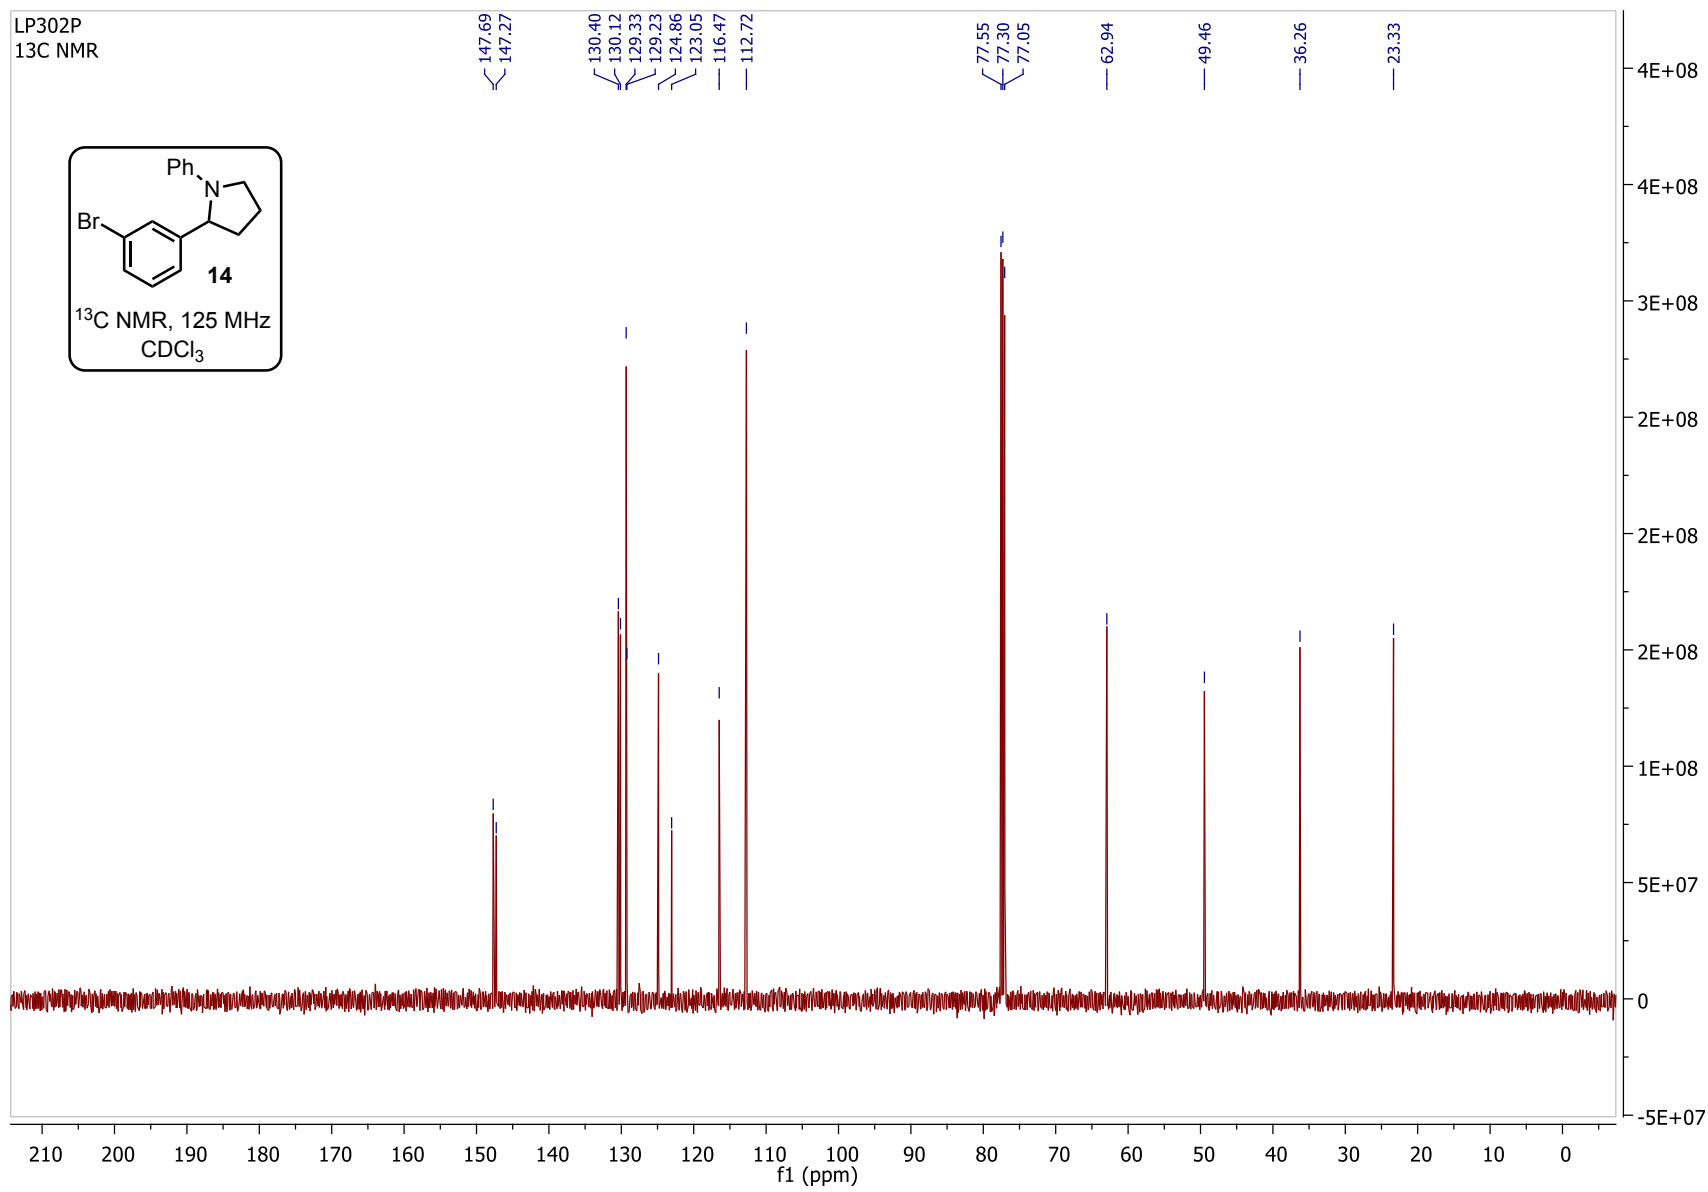



LP301P  
1H NMR

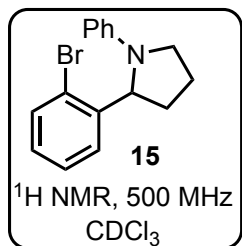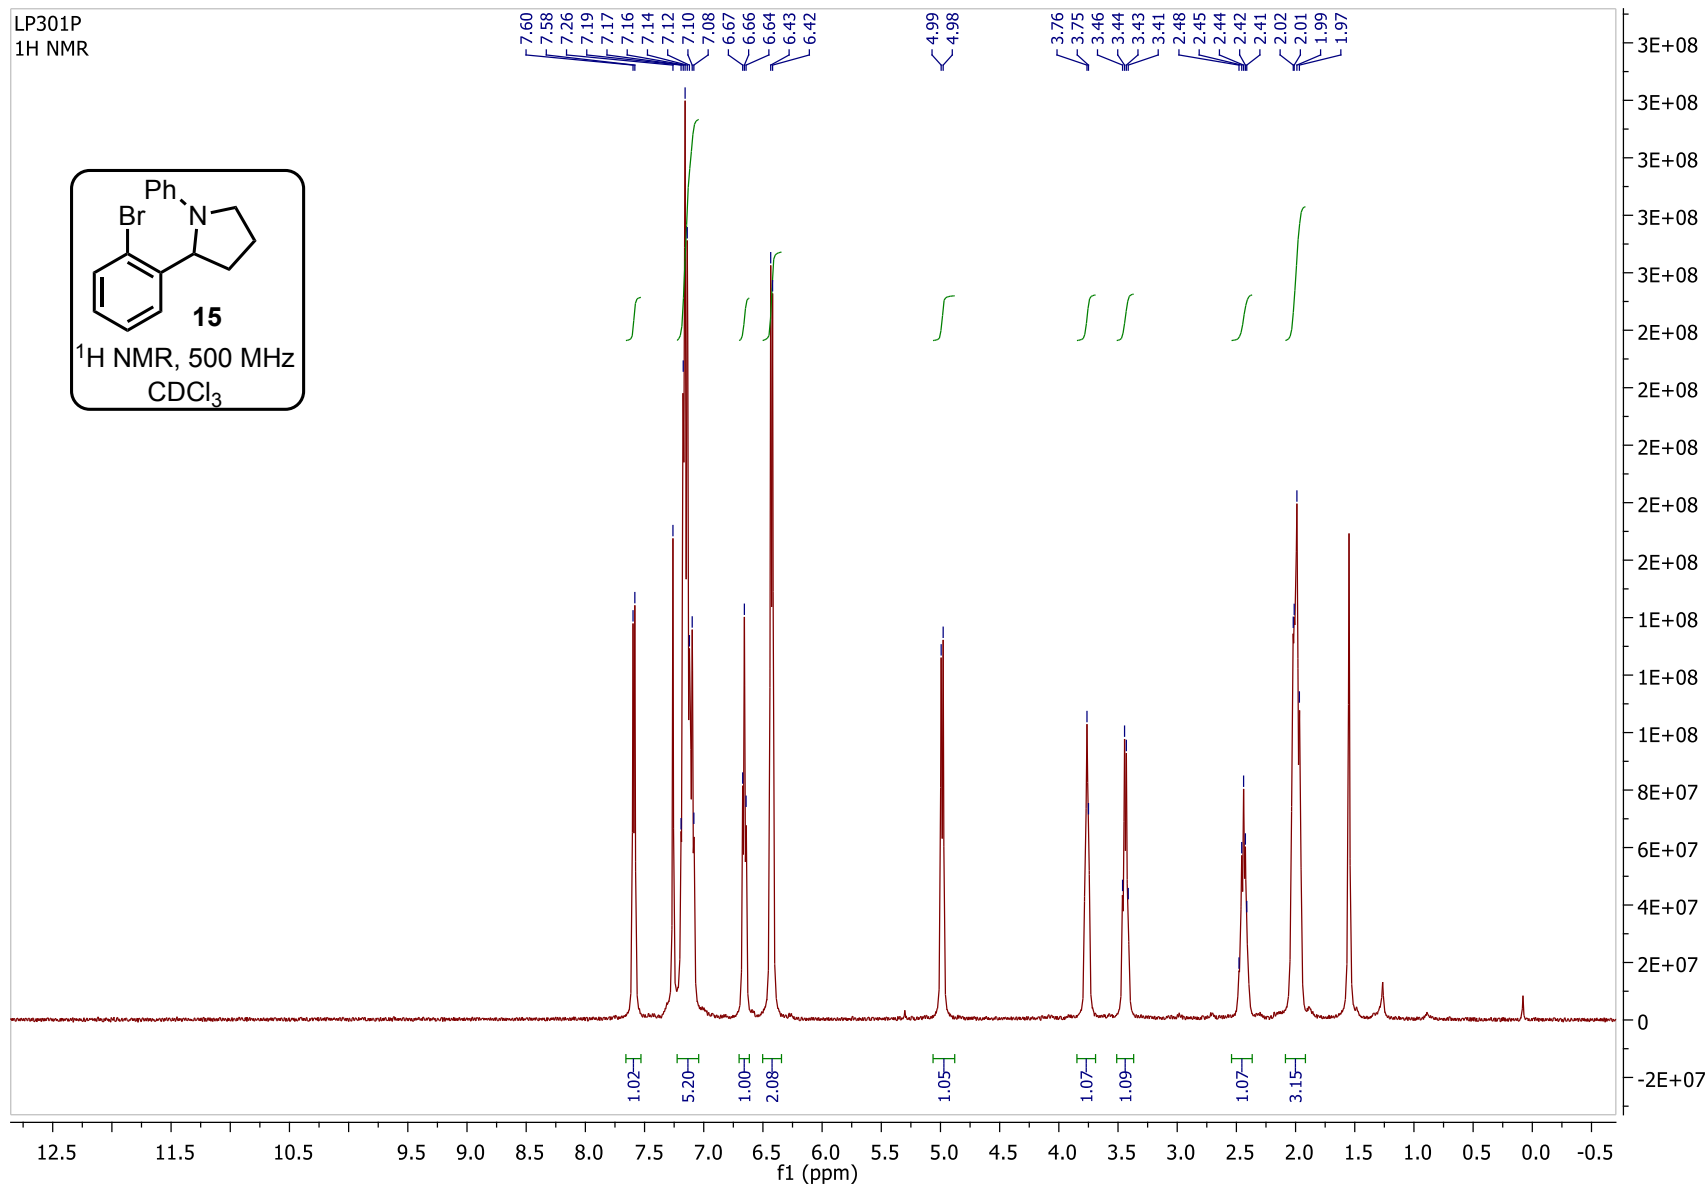

LP301P  
13C NMR

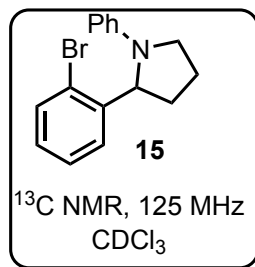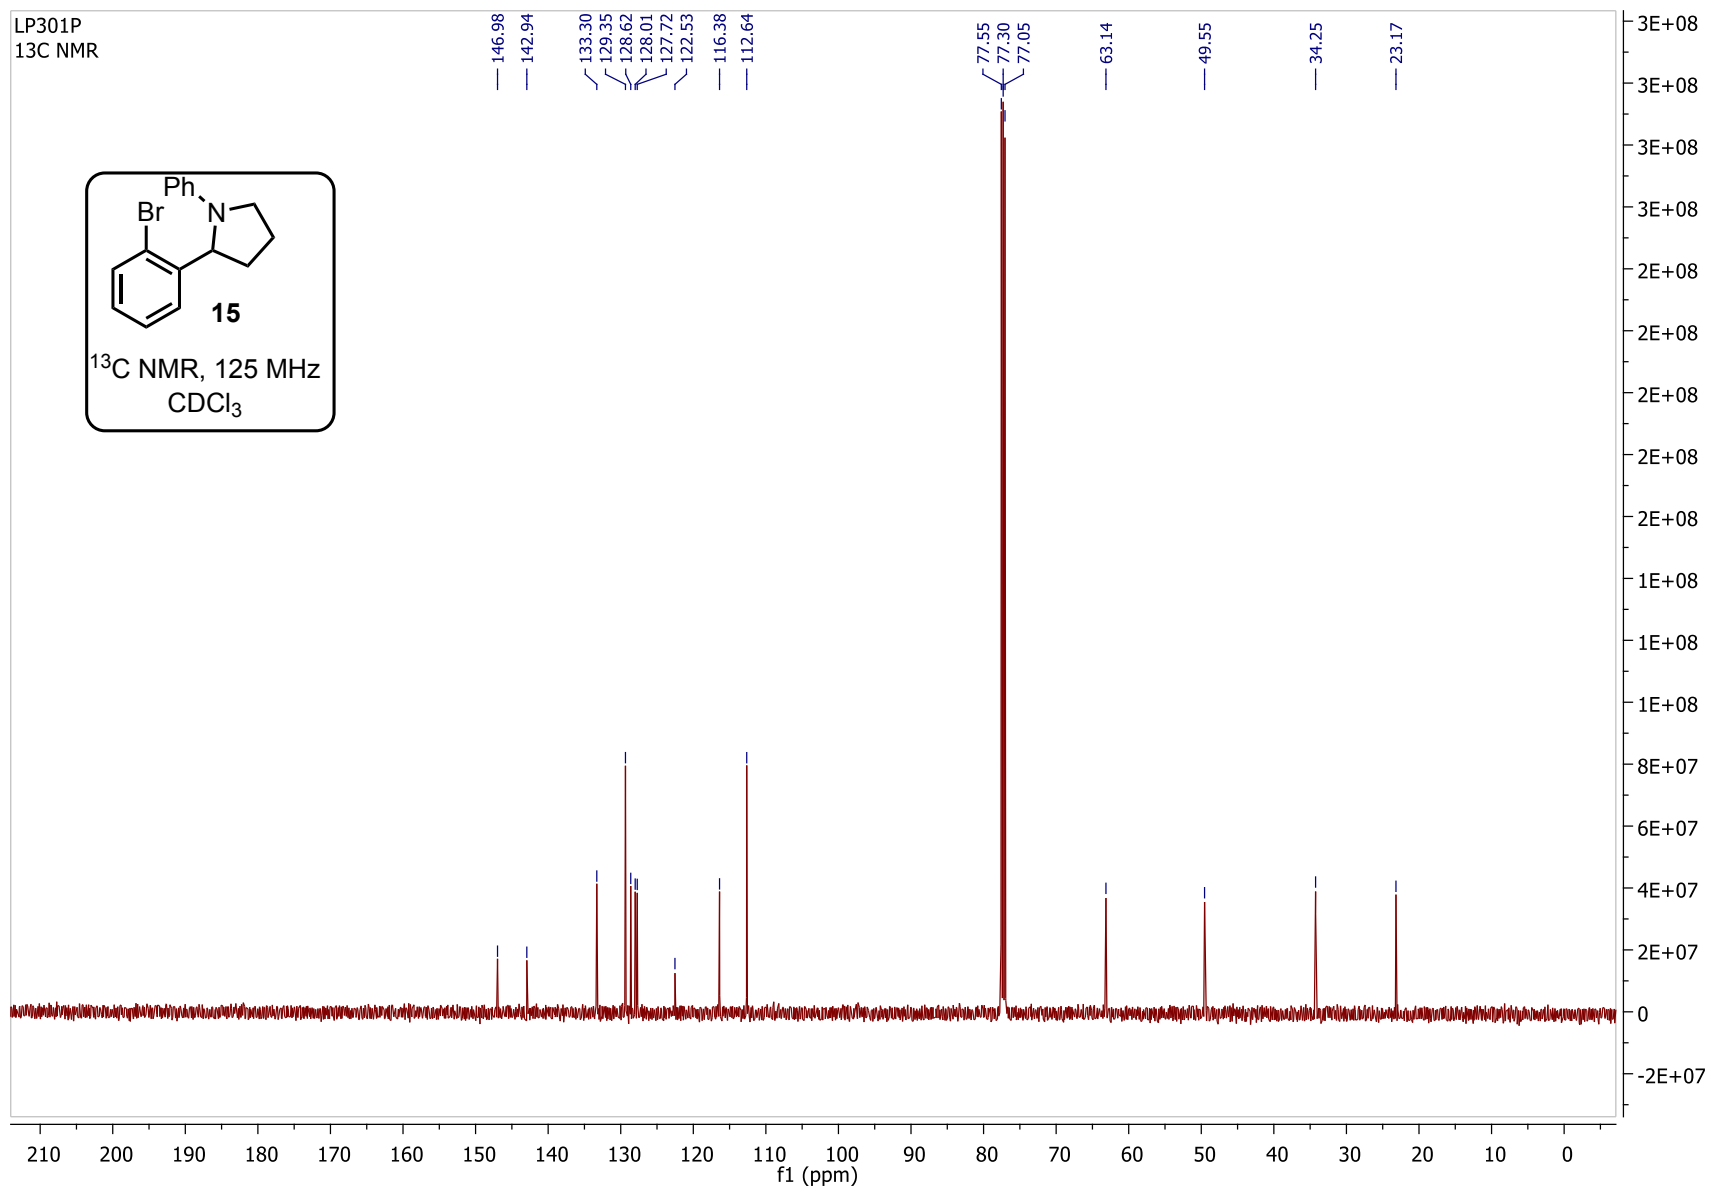

LP349P1  
1H NMR

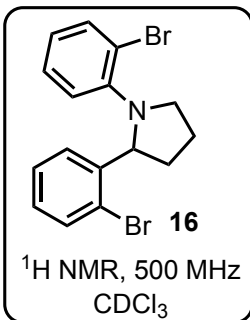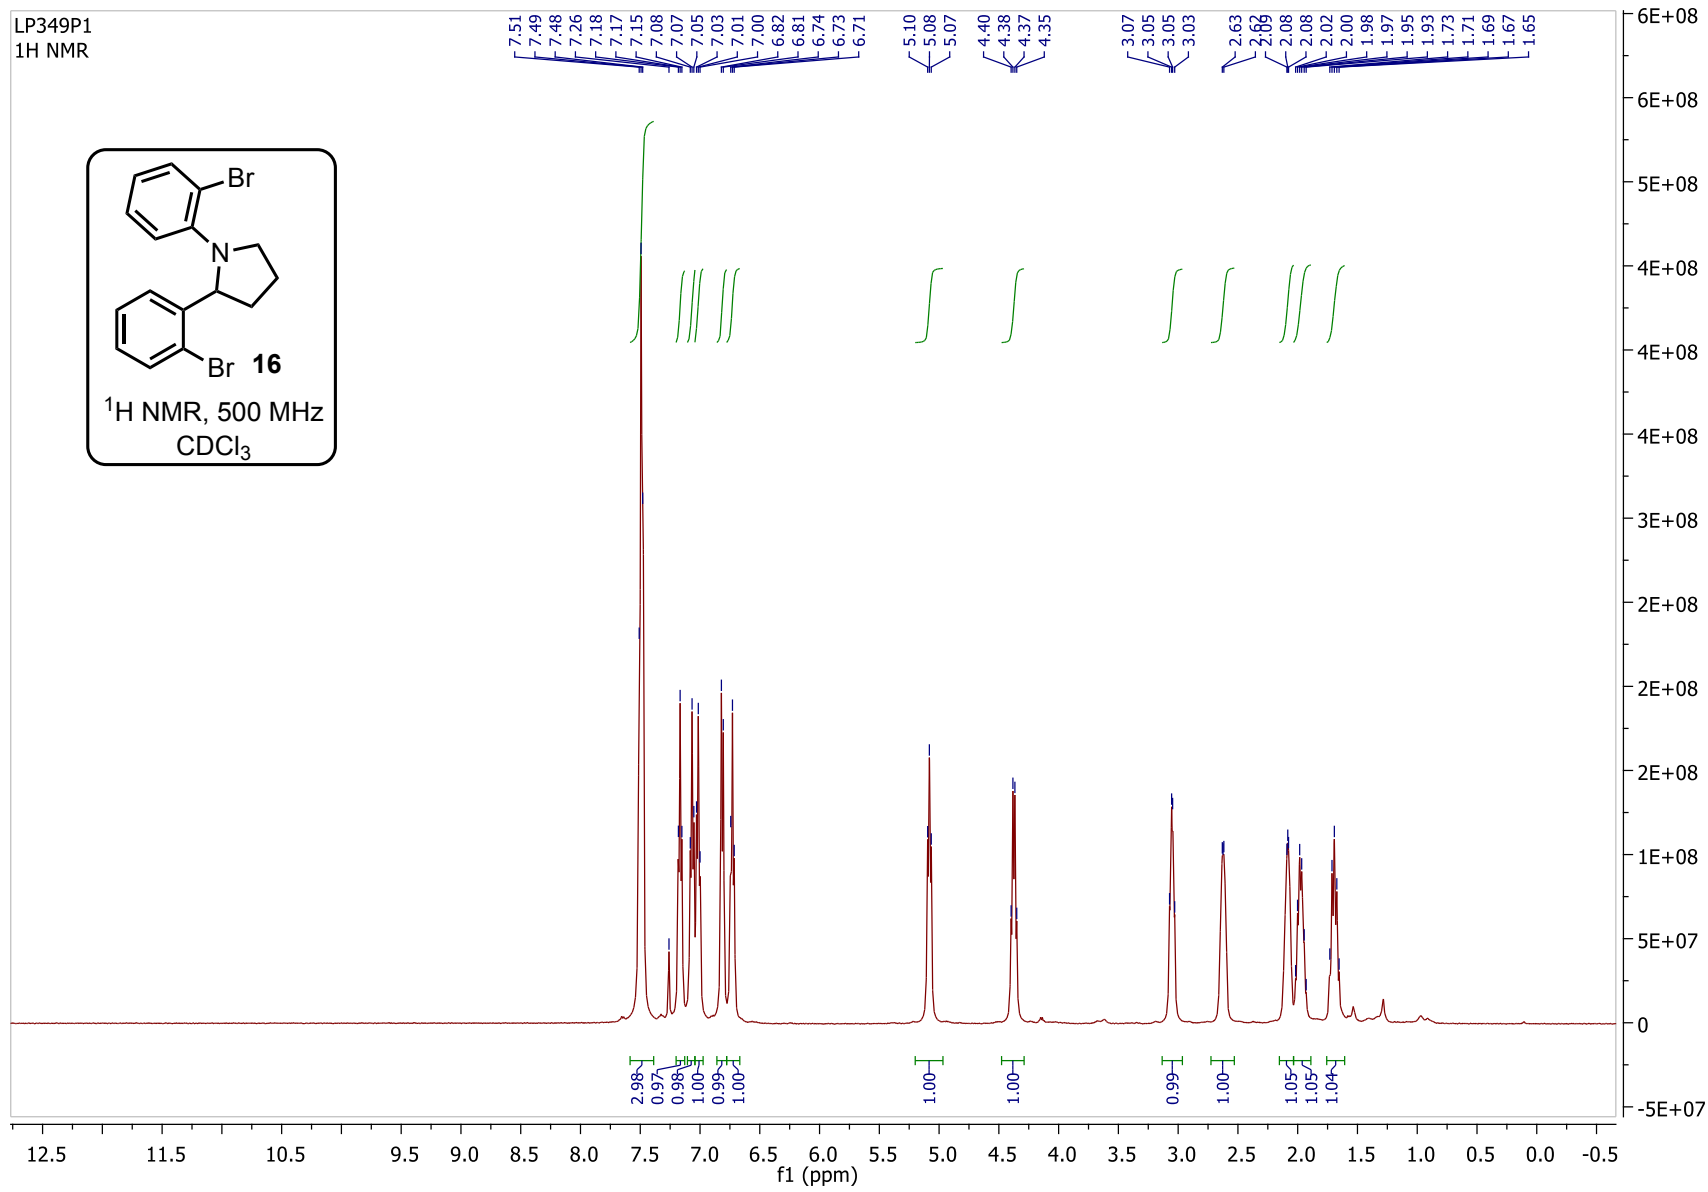

LP349P1  
13C NMR

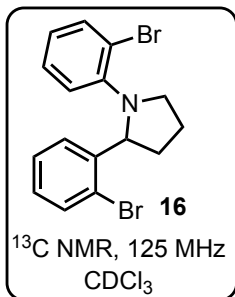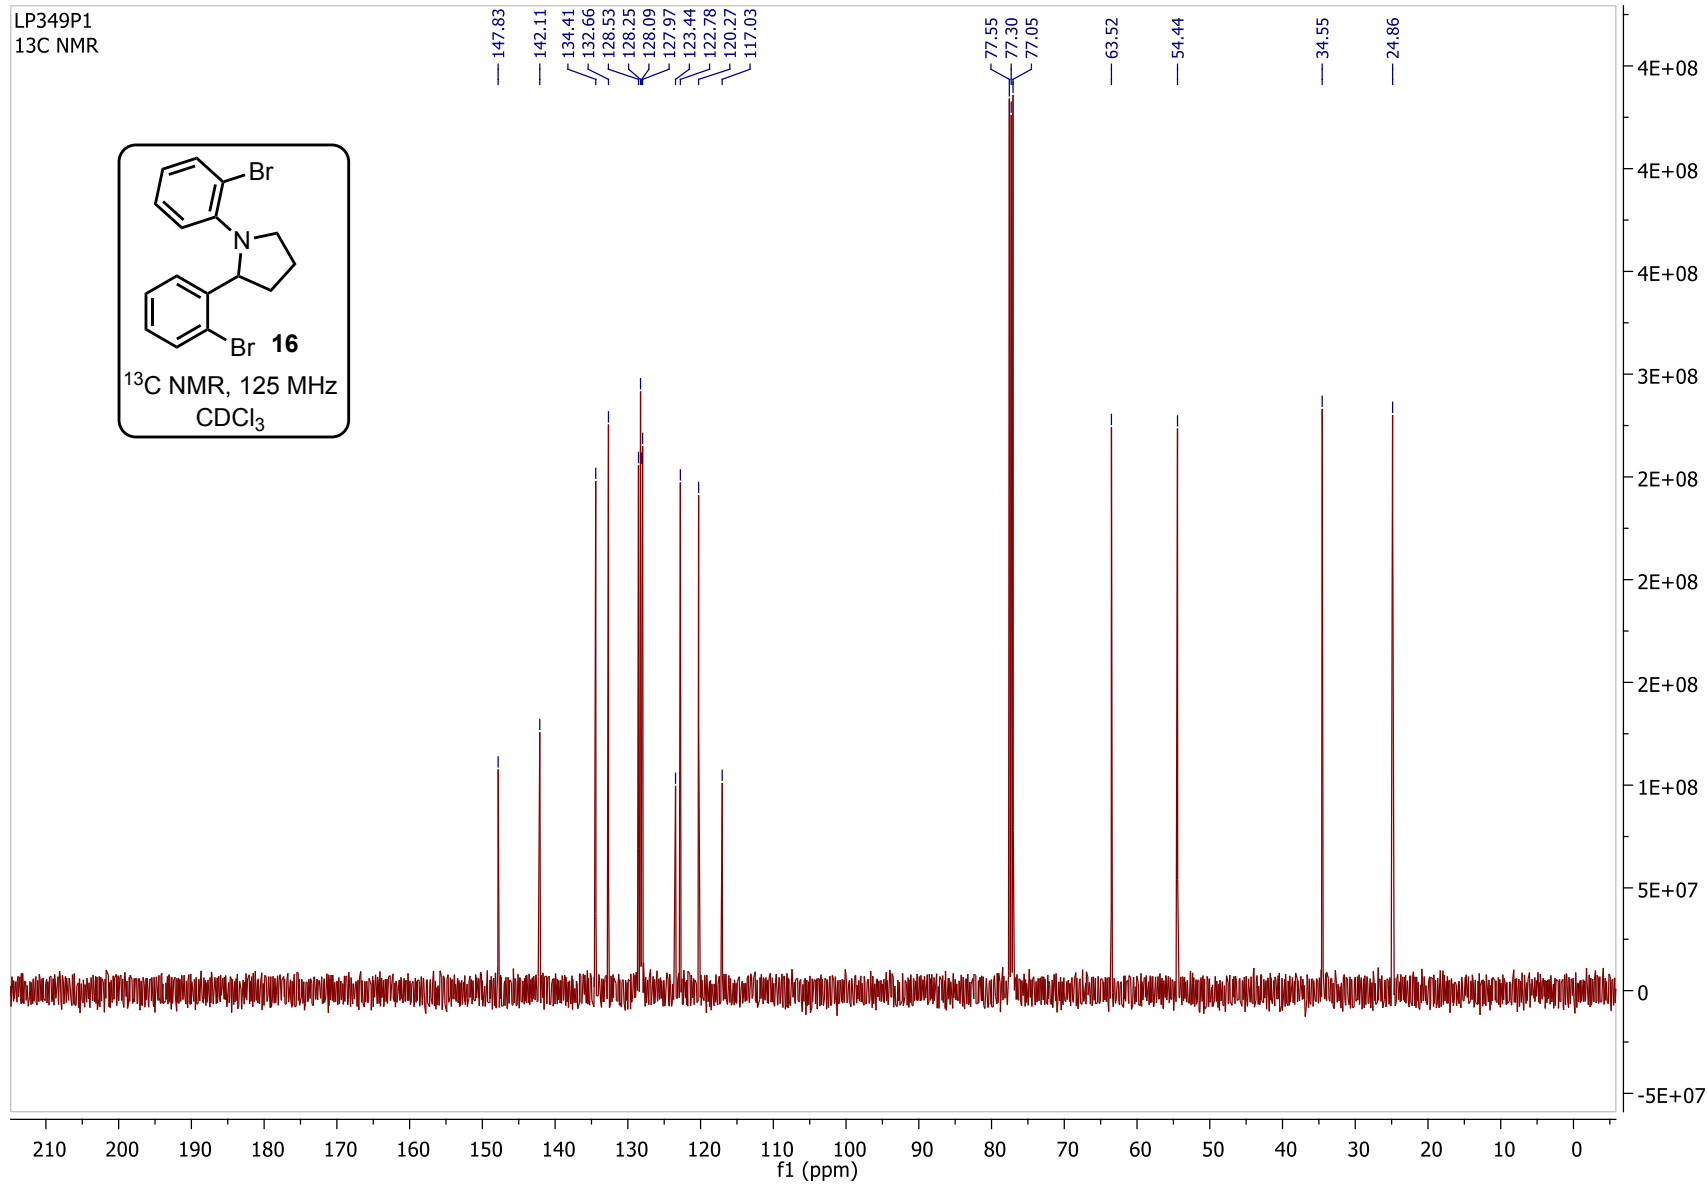

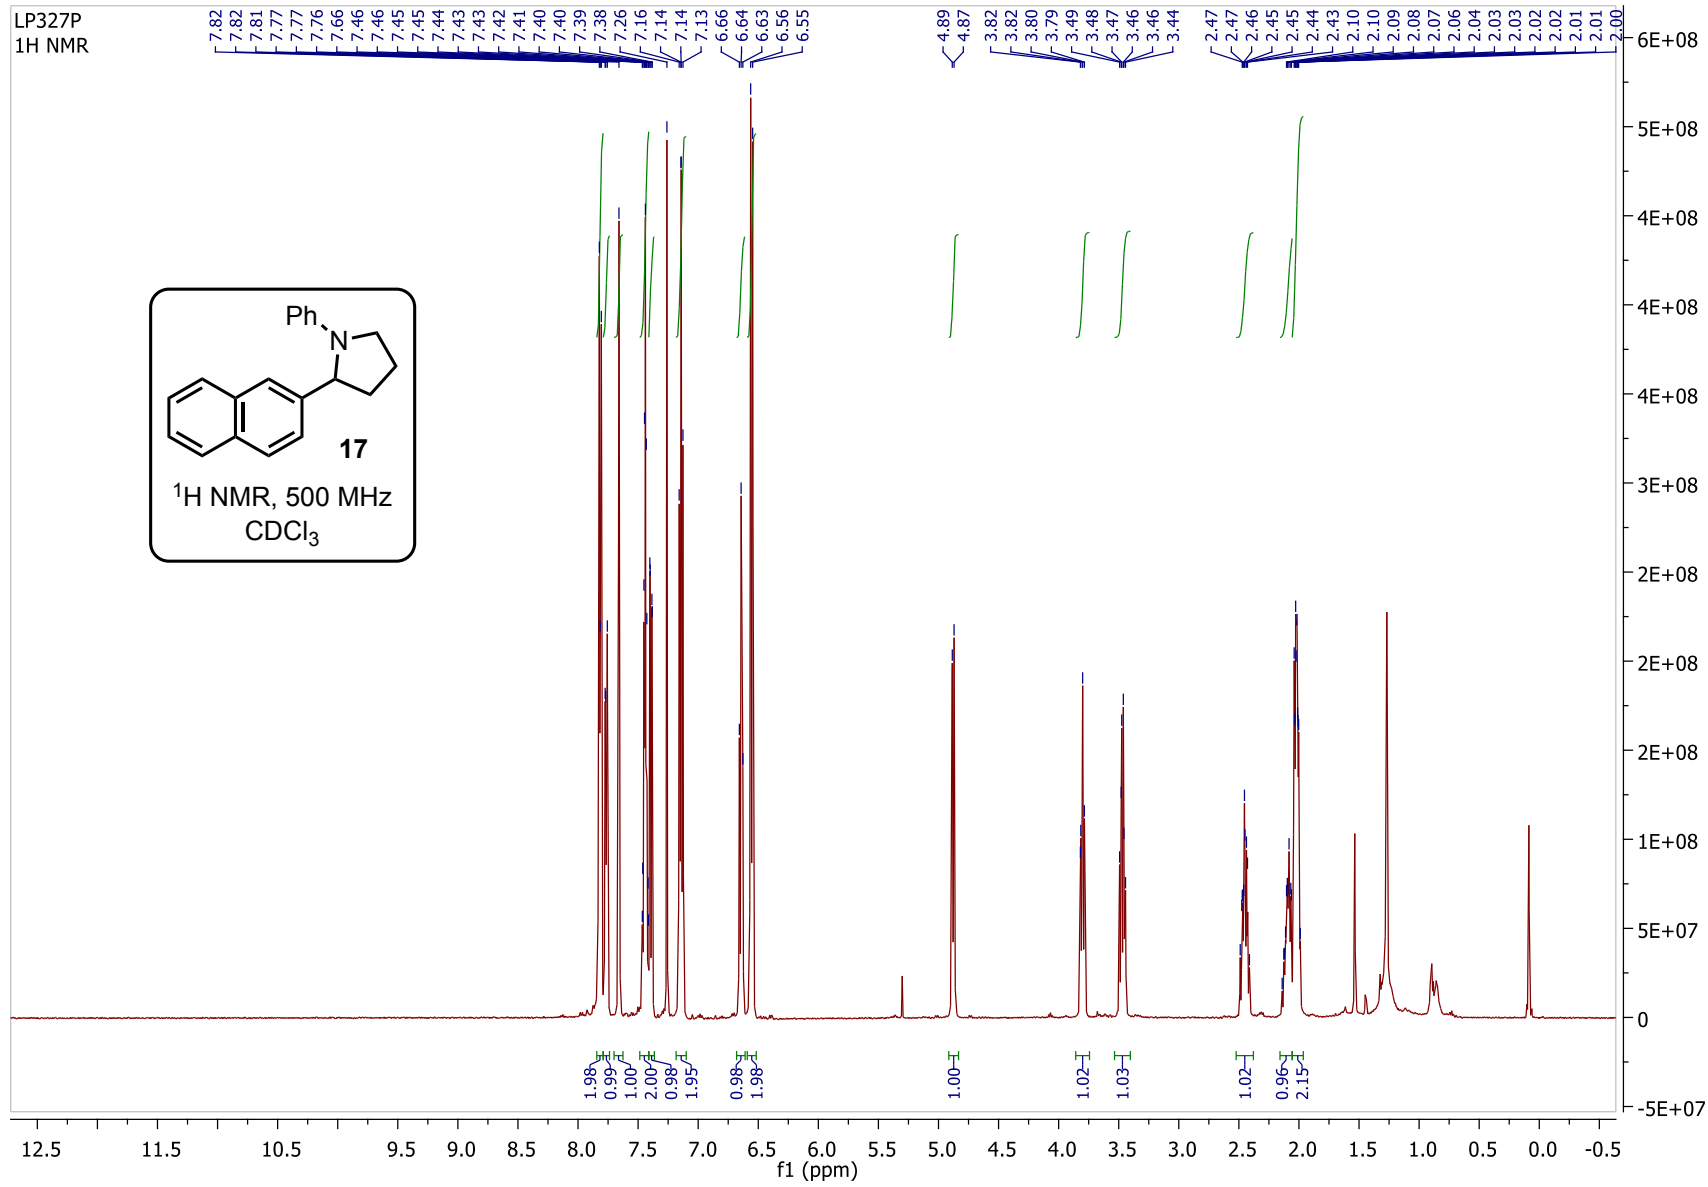

LP327P  
13C NMR

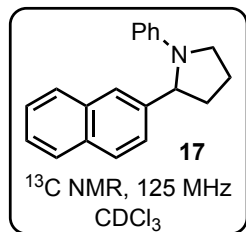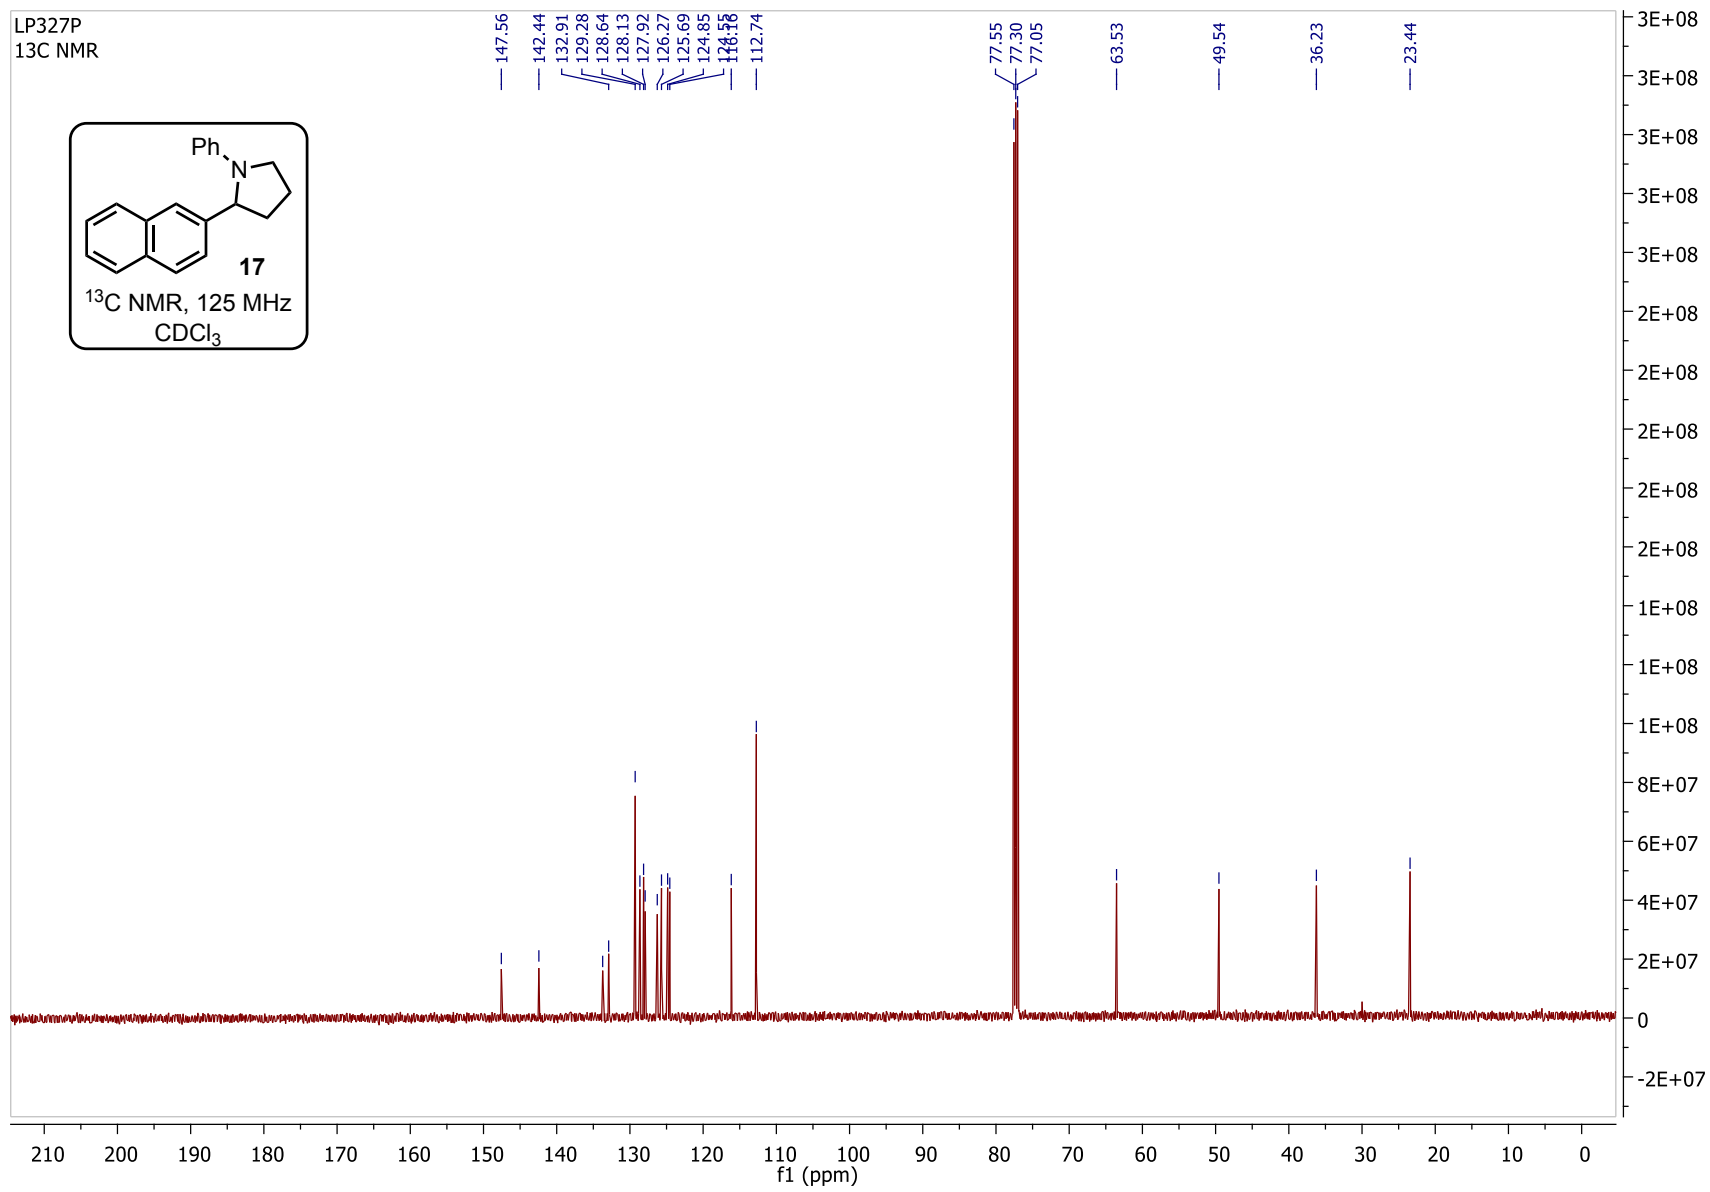

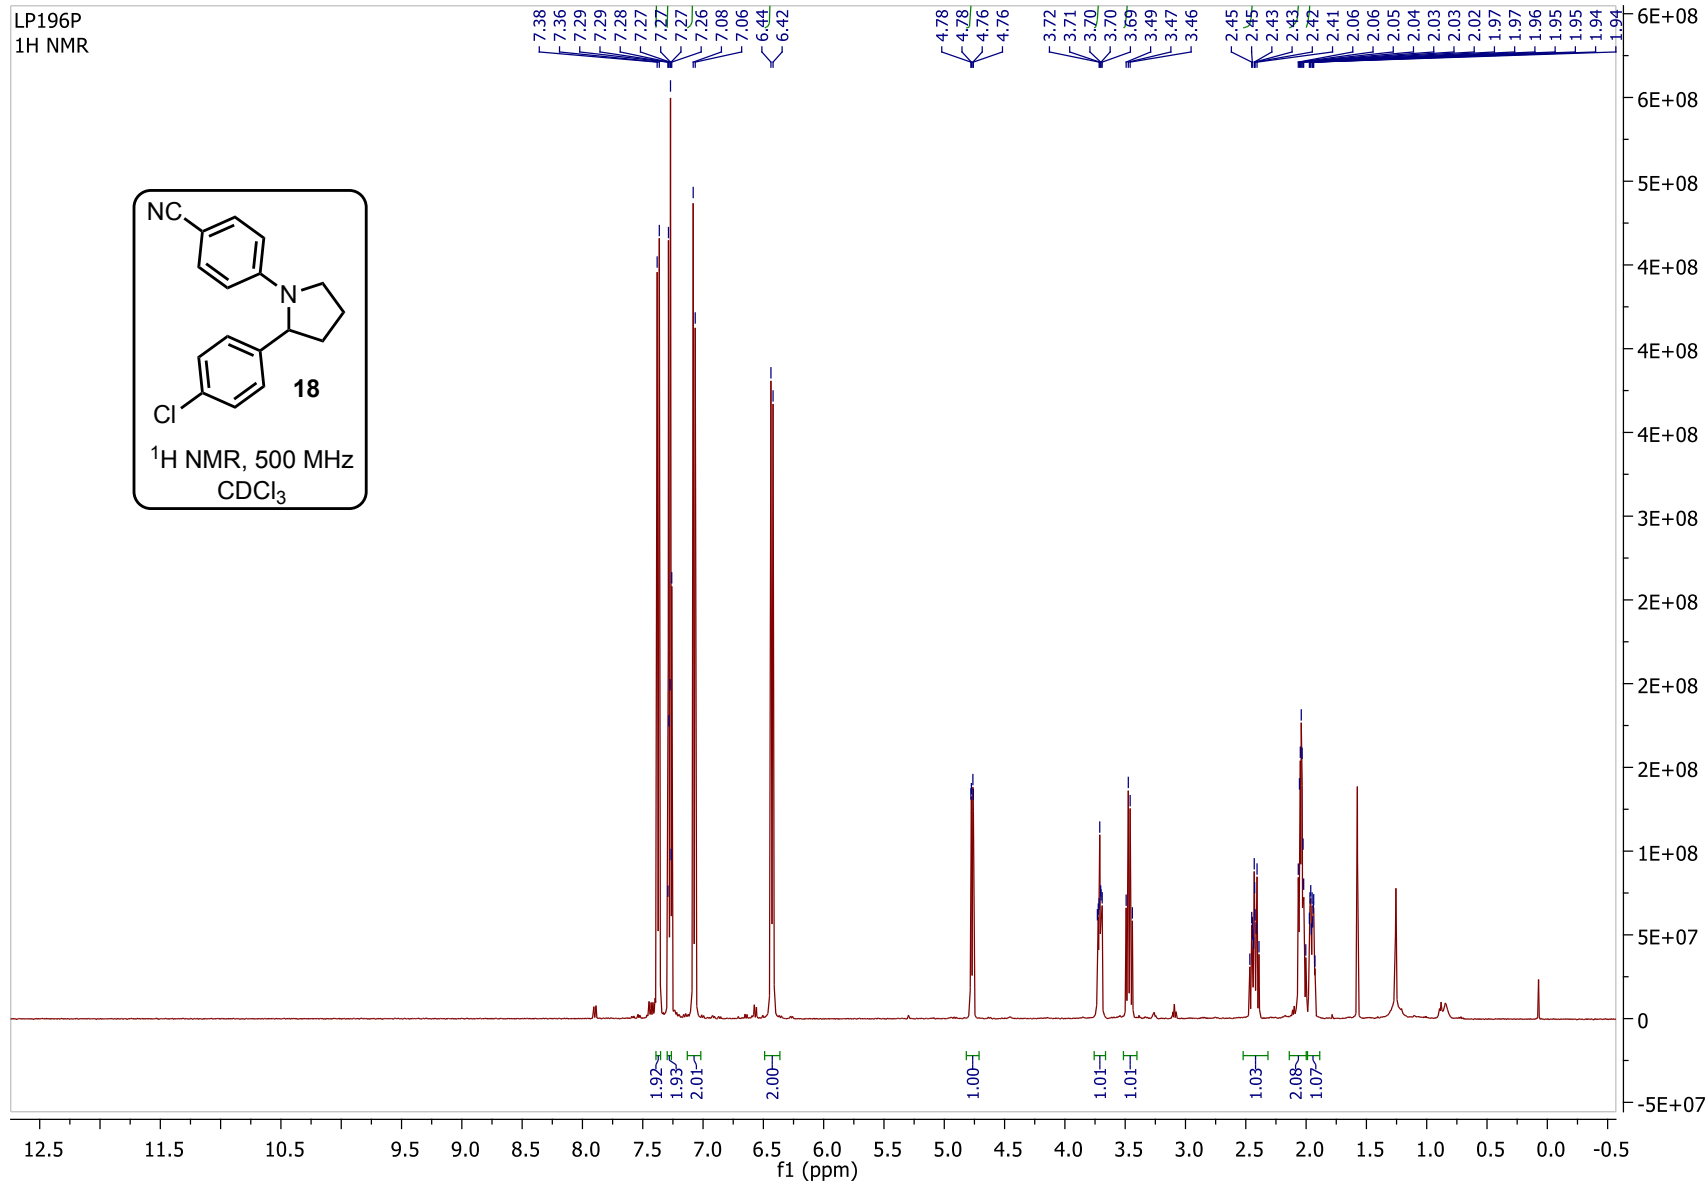

LP196P  
13C NMR

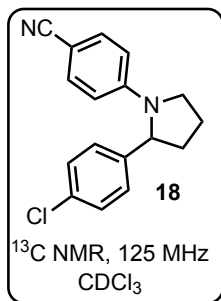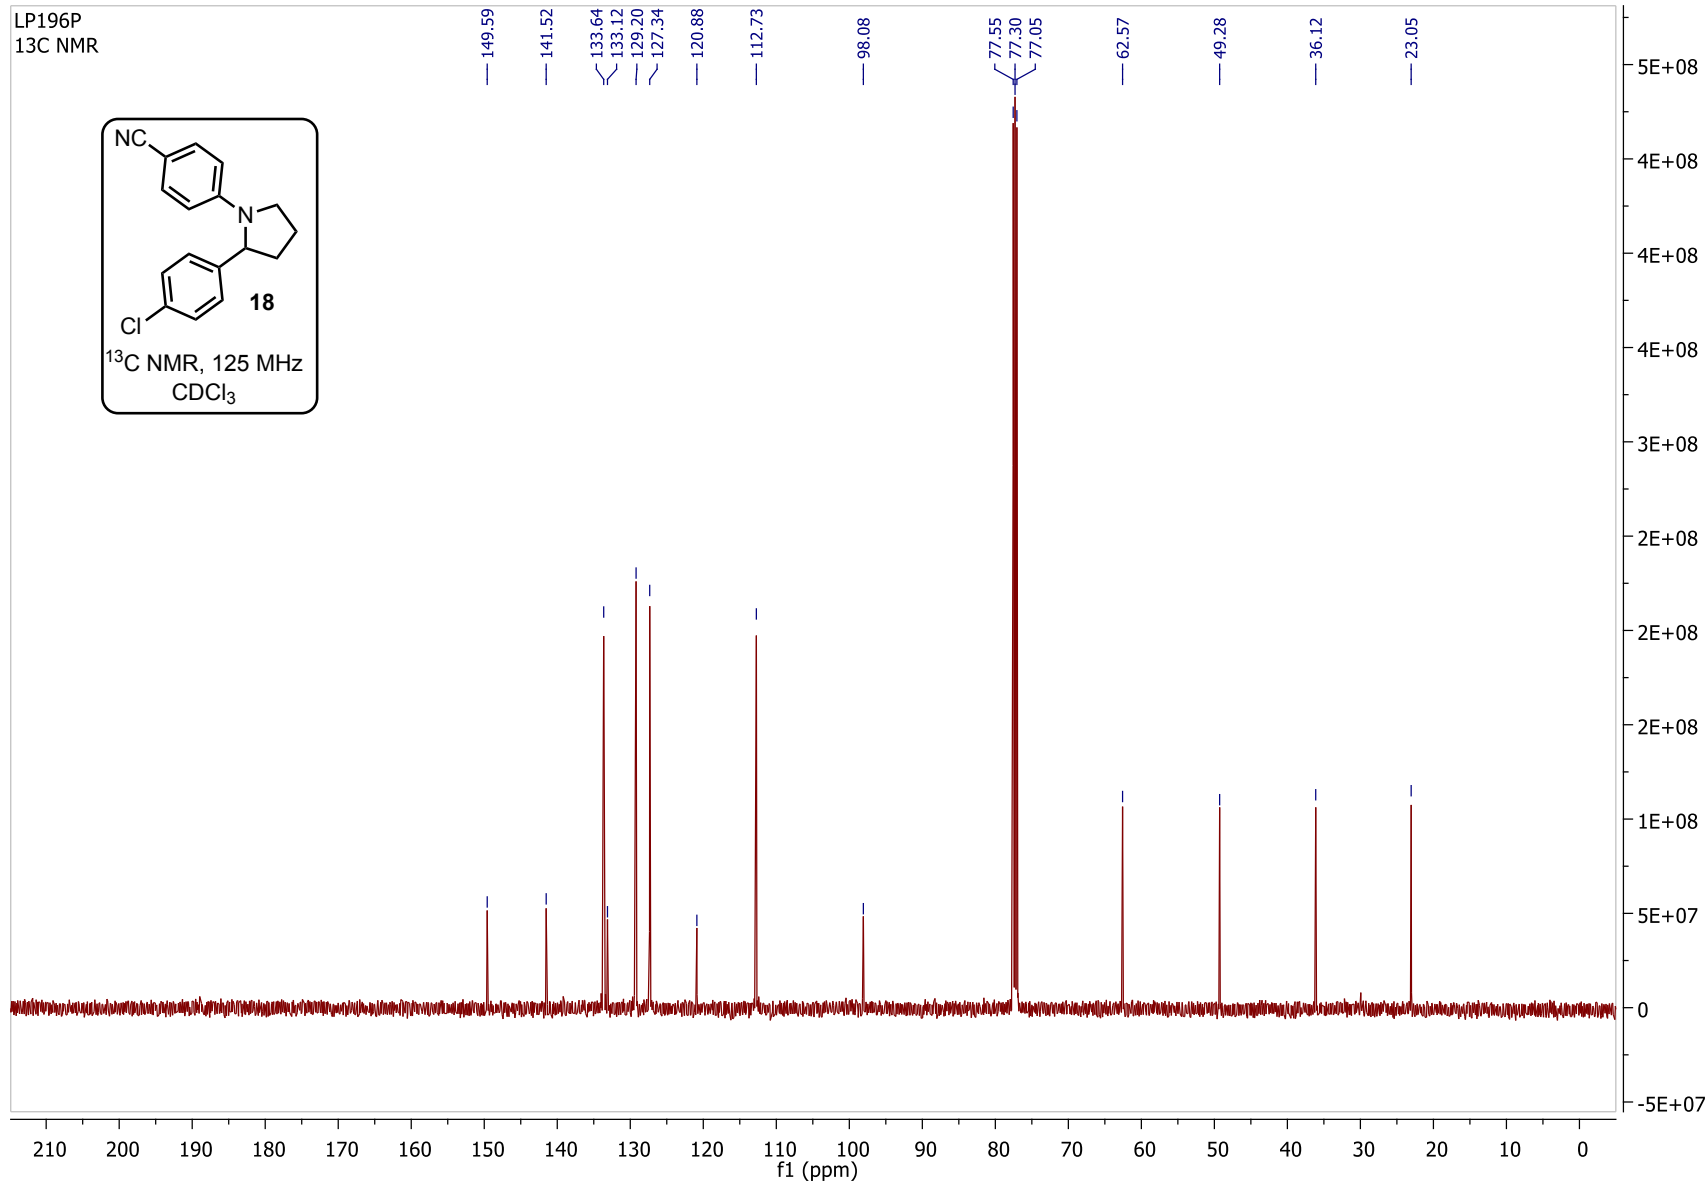



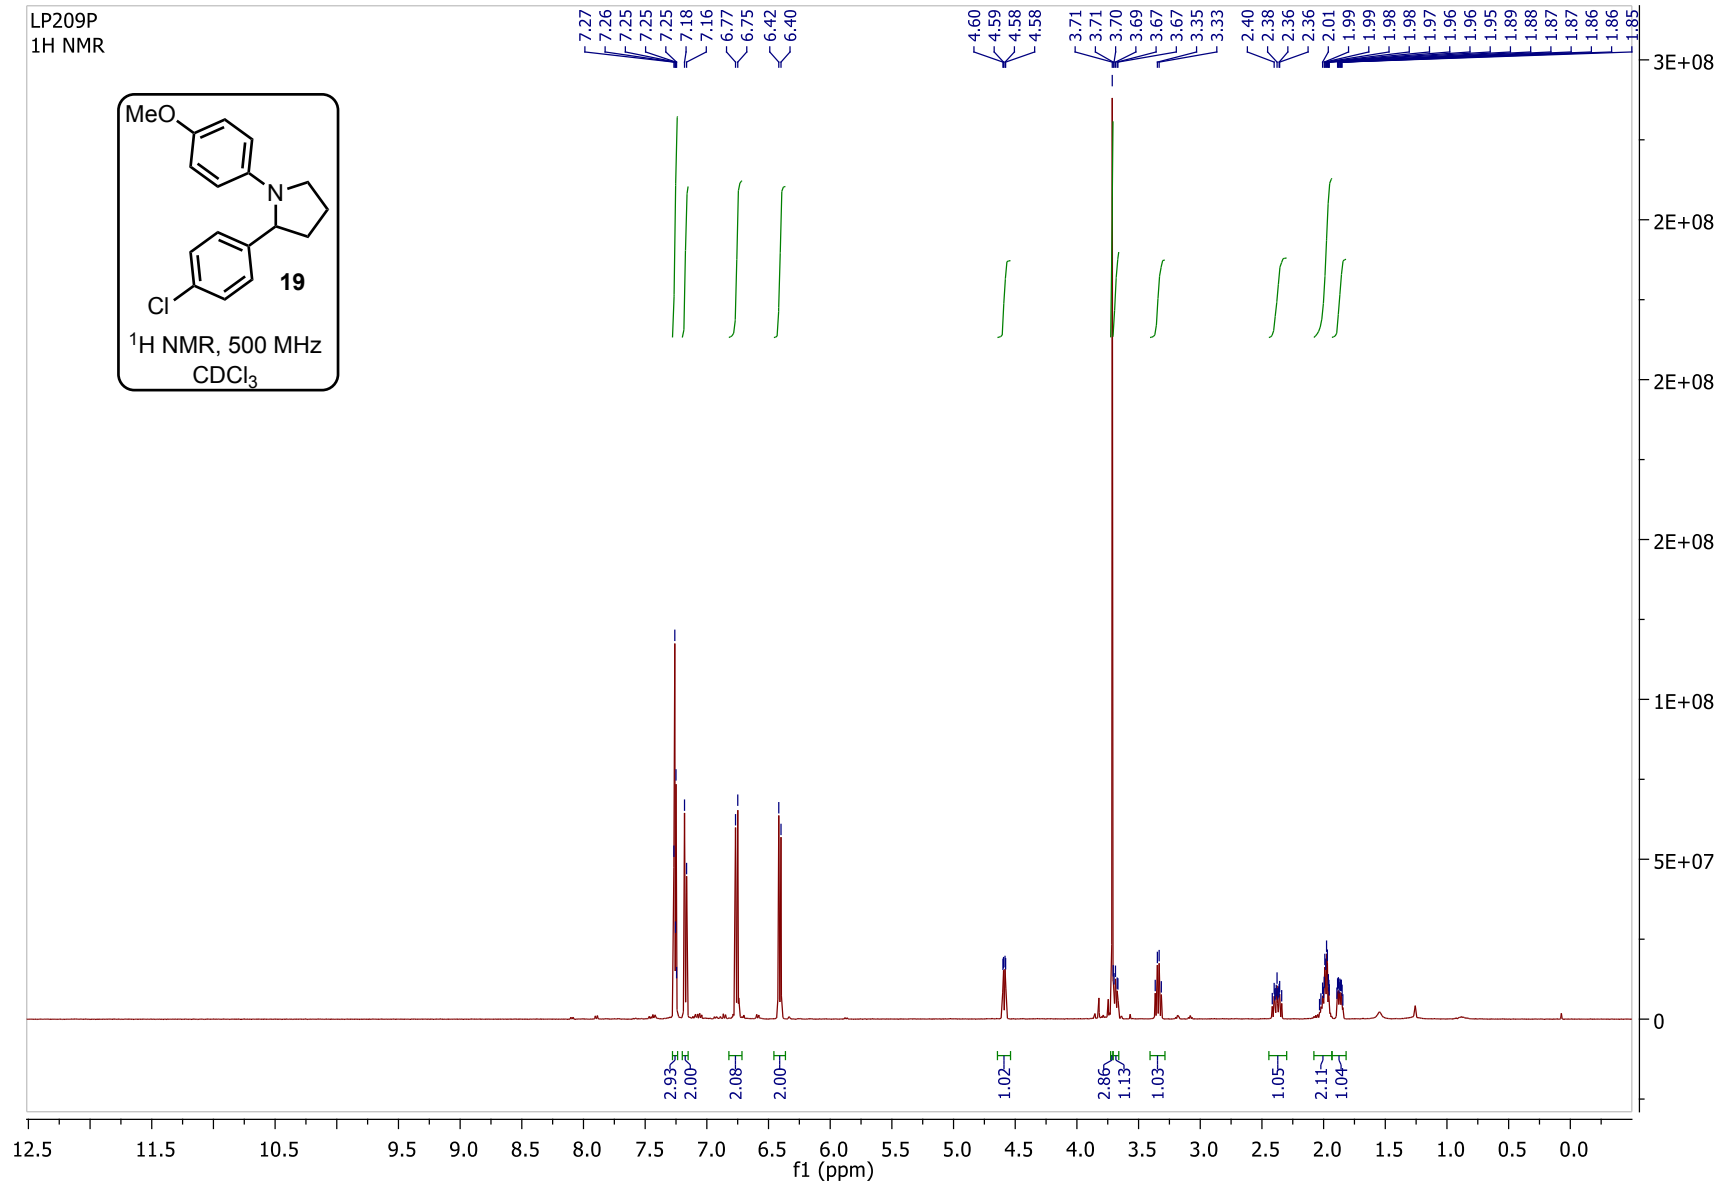

LP209P1  
13C NMR

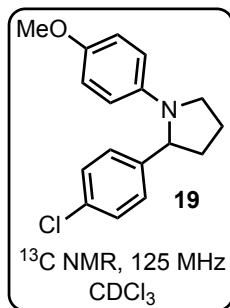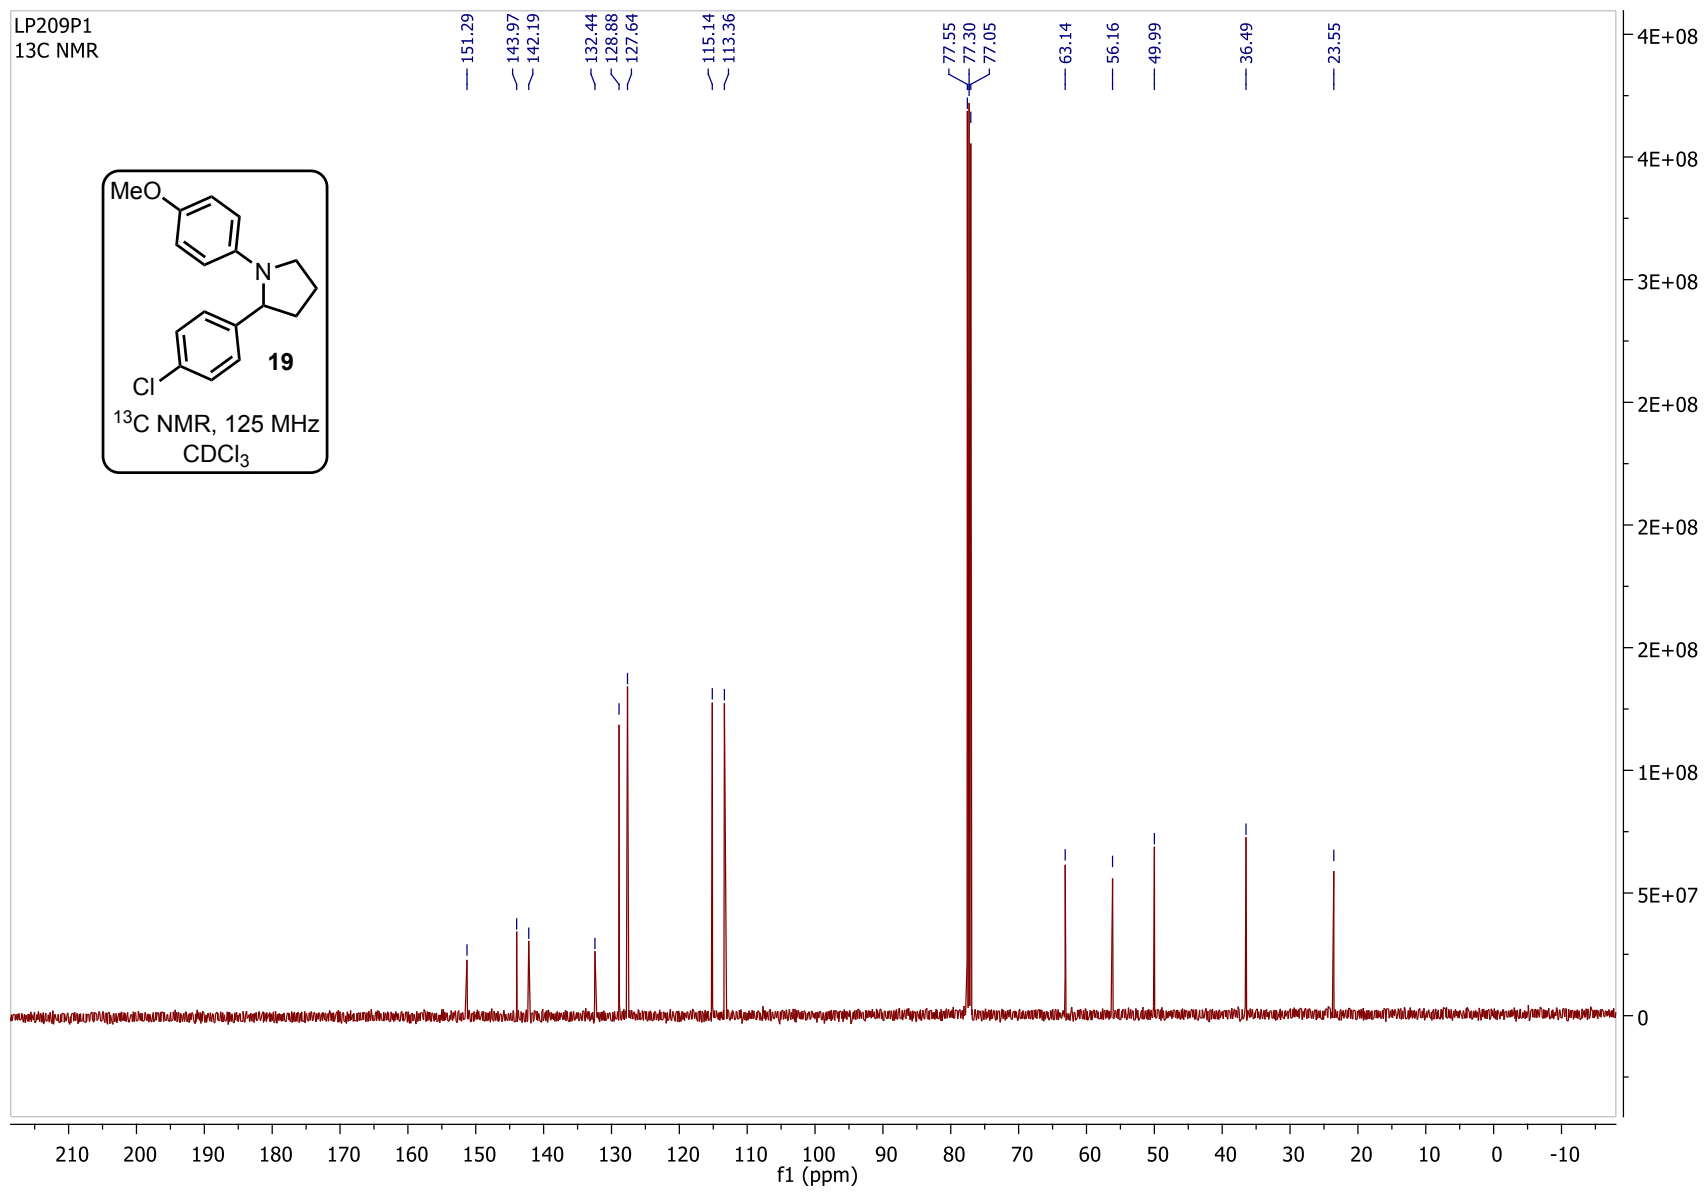

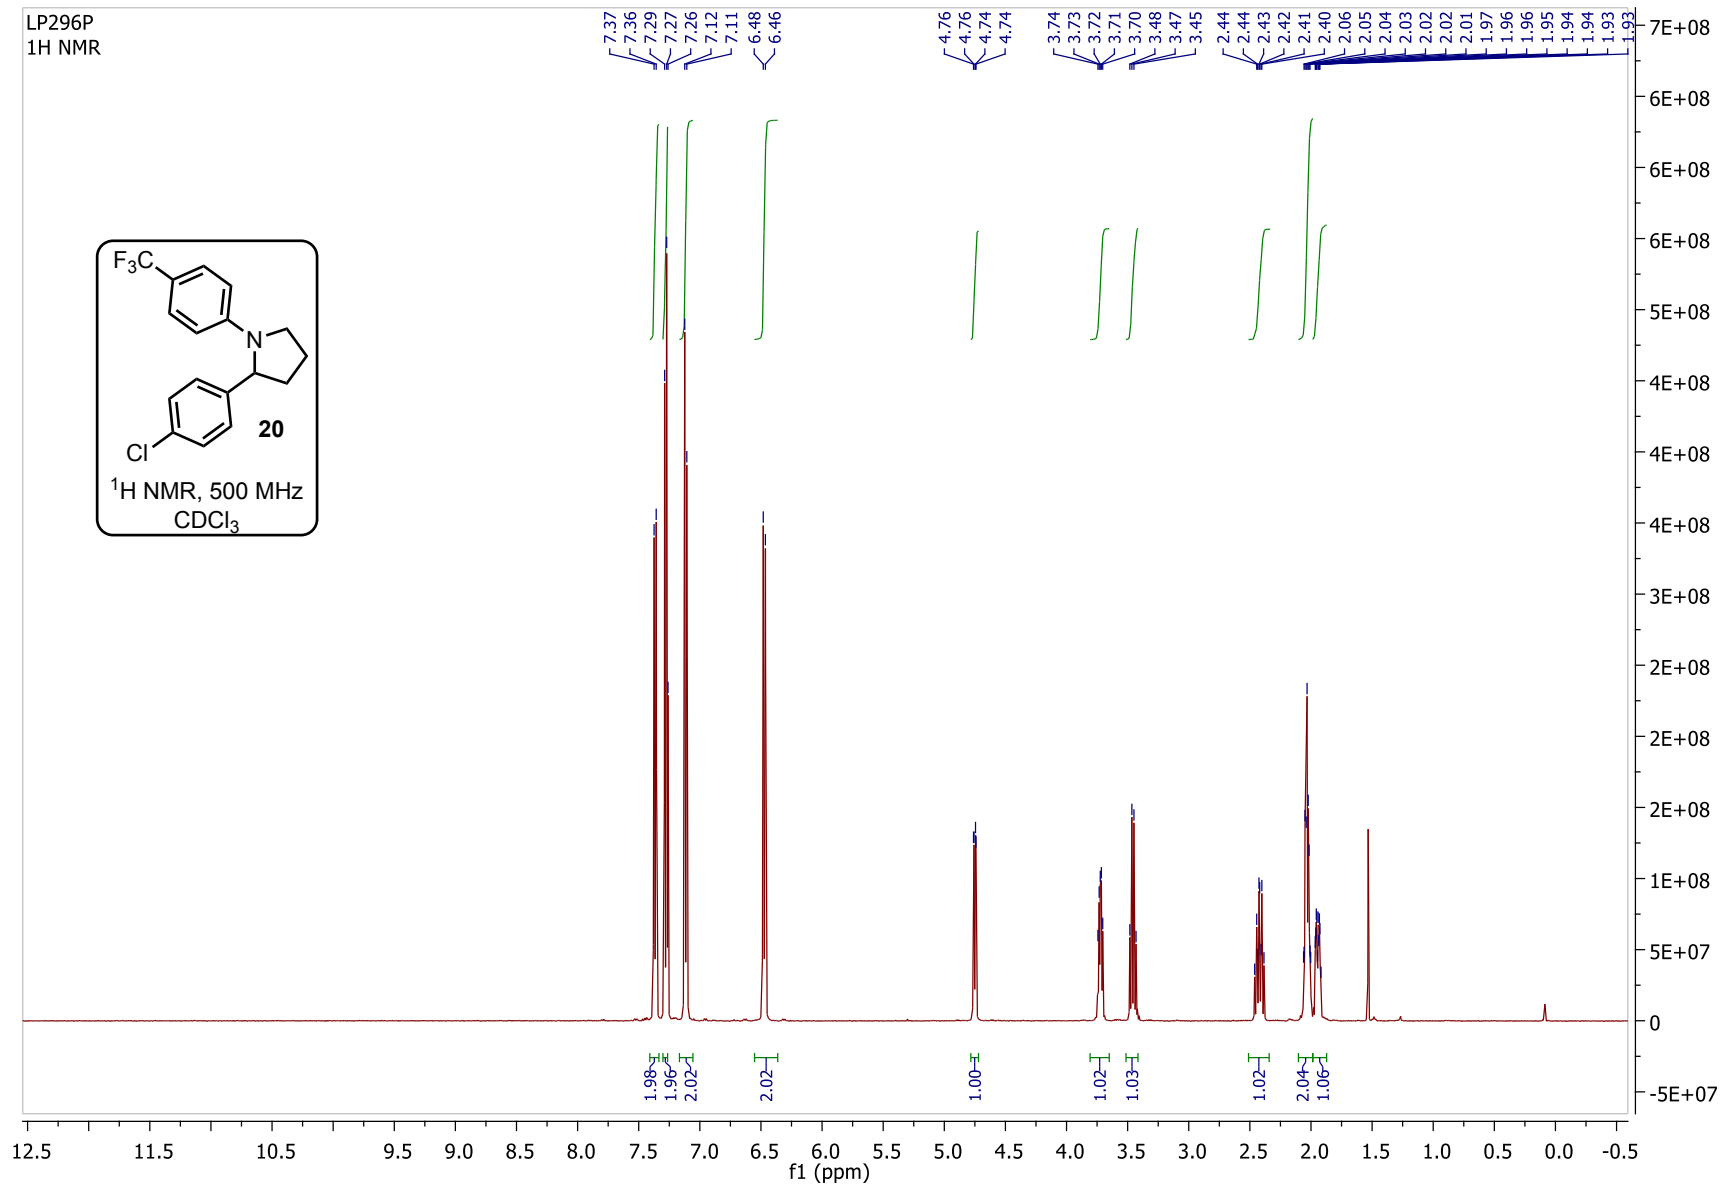

LP296P  
13C NMR

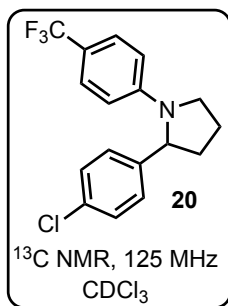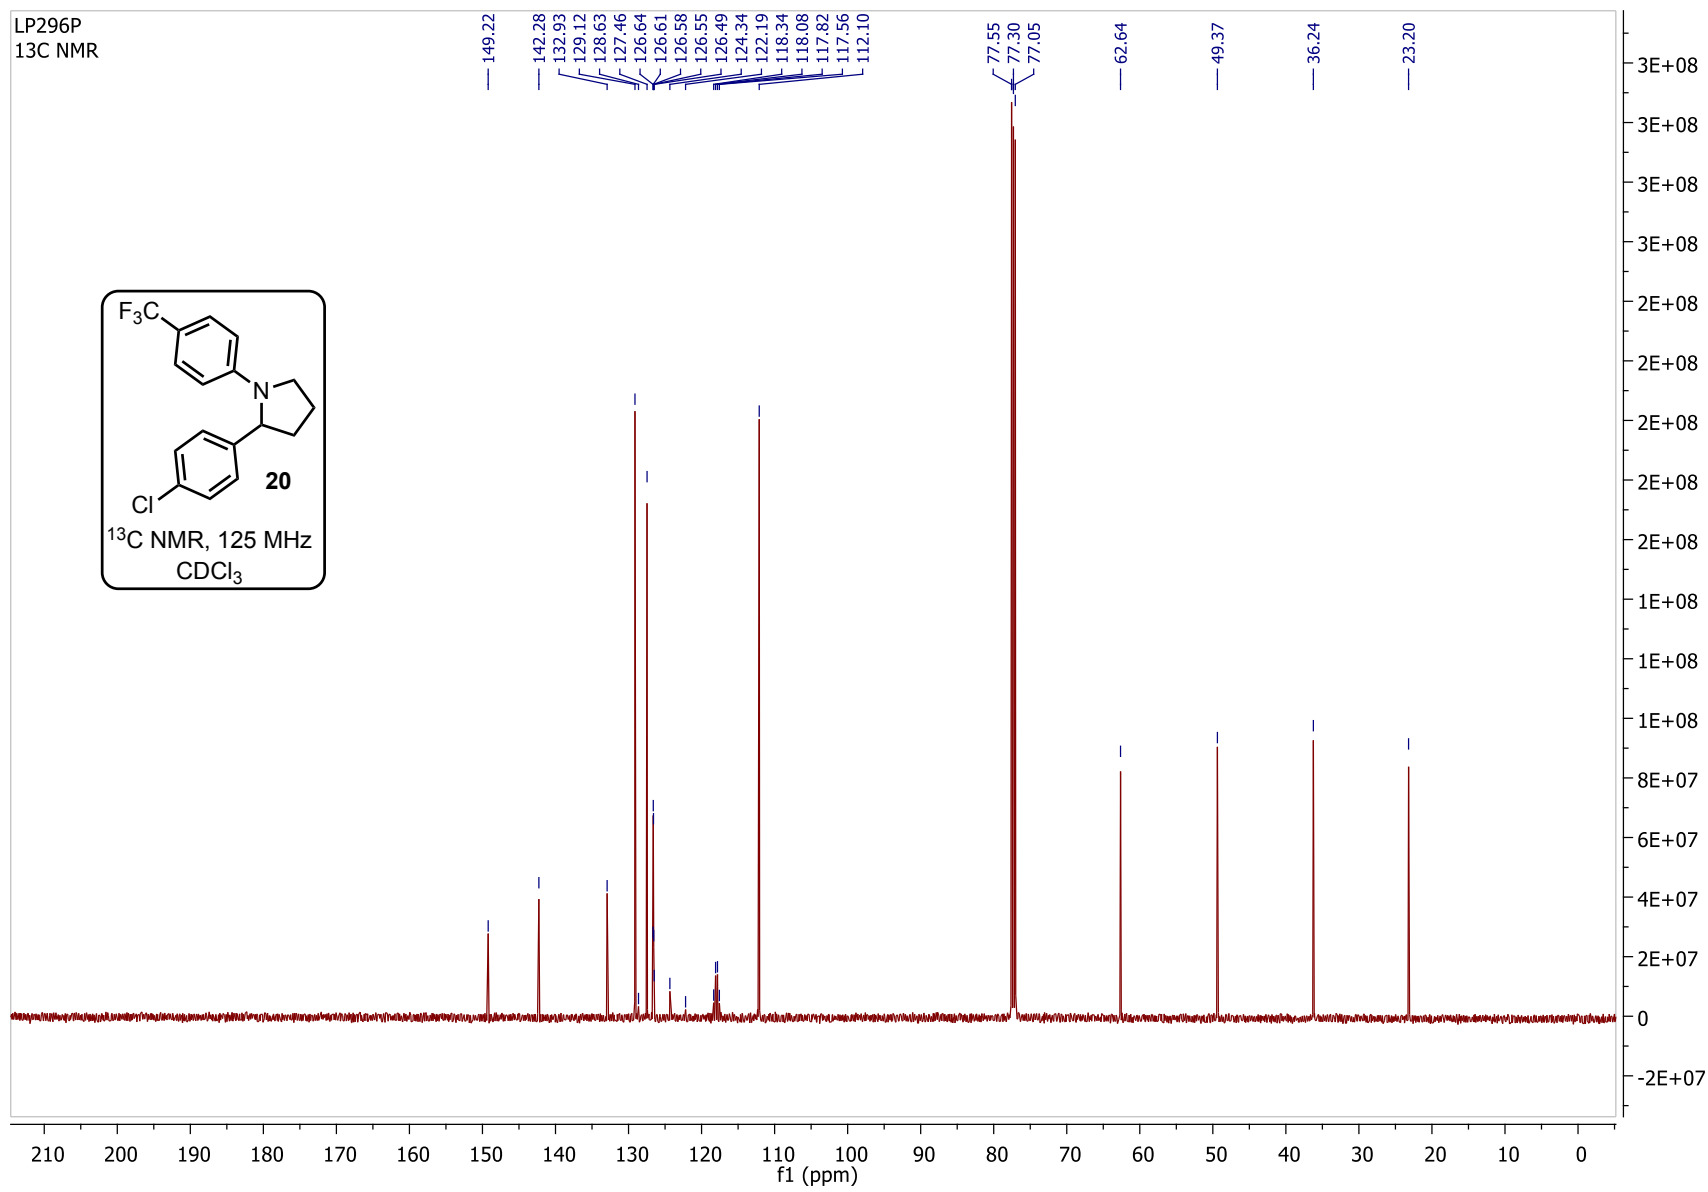

F19 NMR

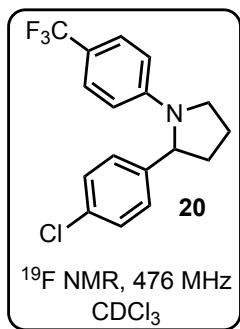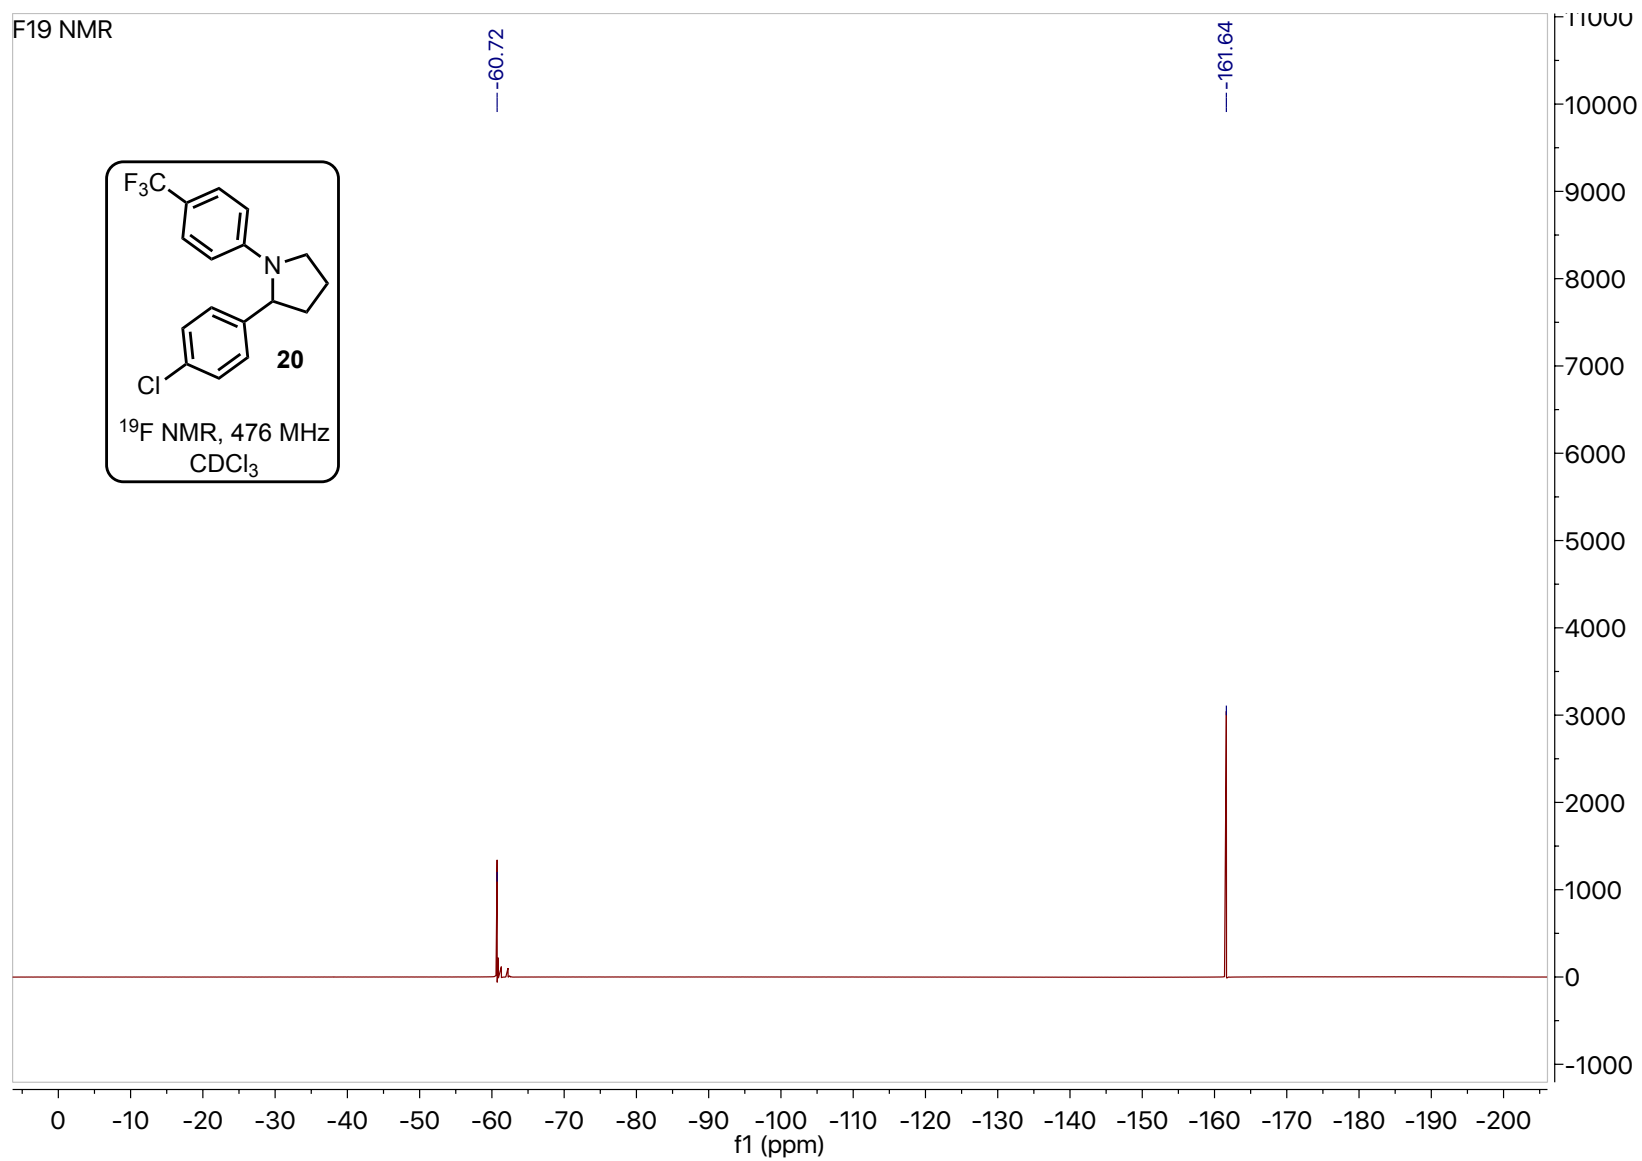

LP239F36-42  
1H NMR

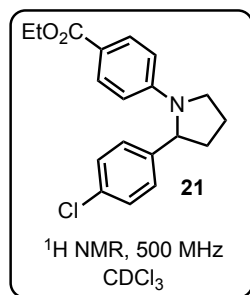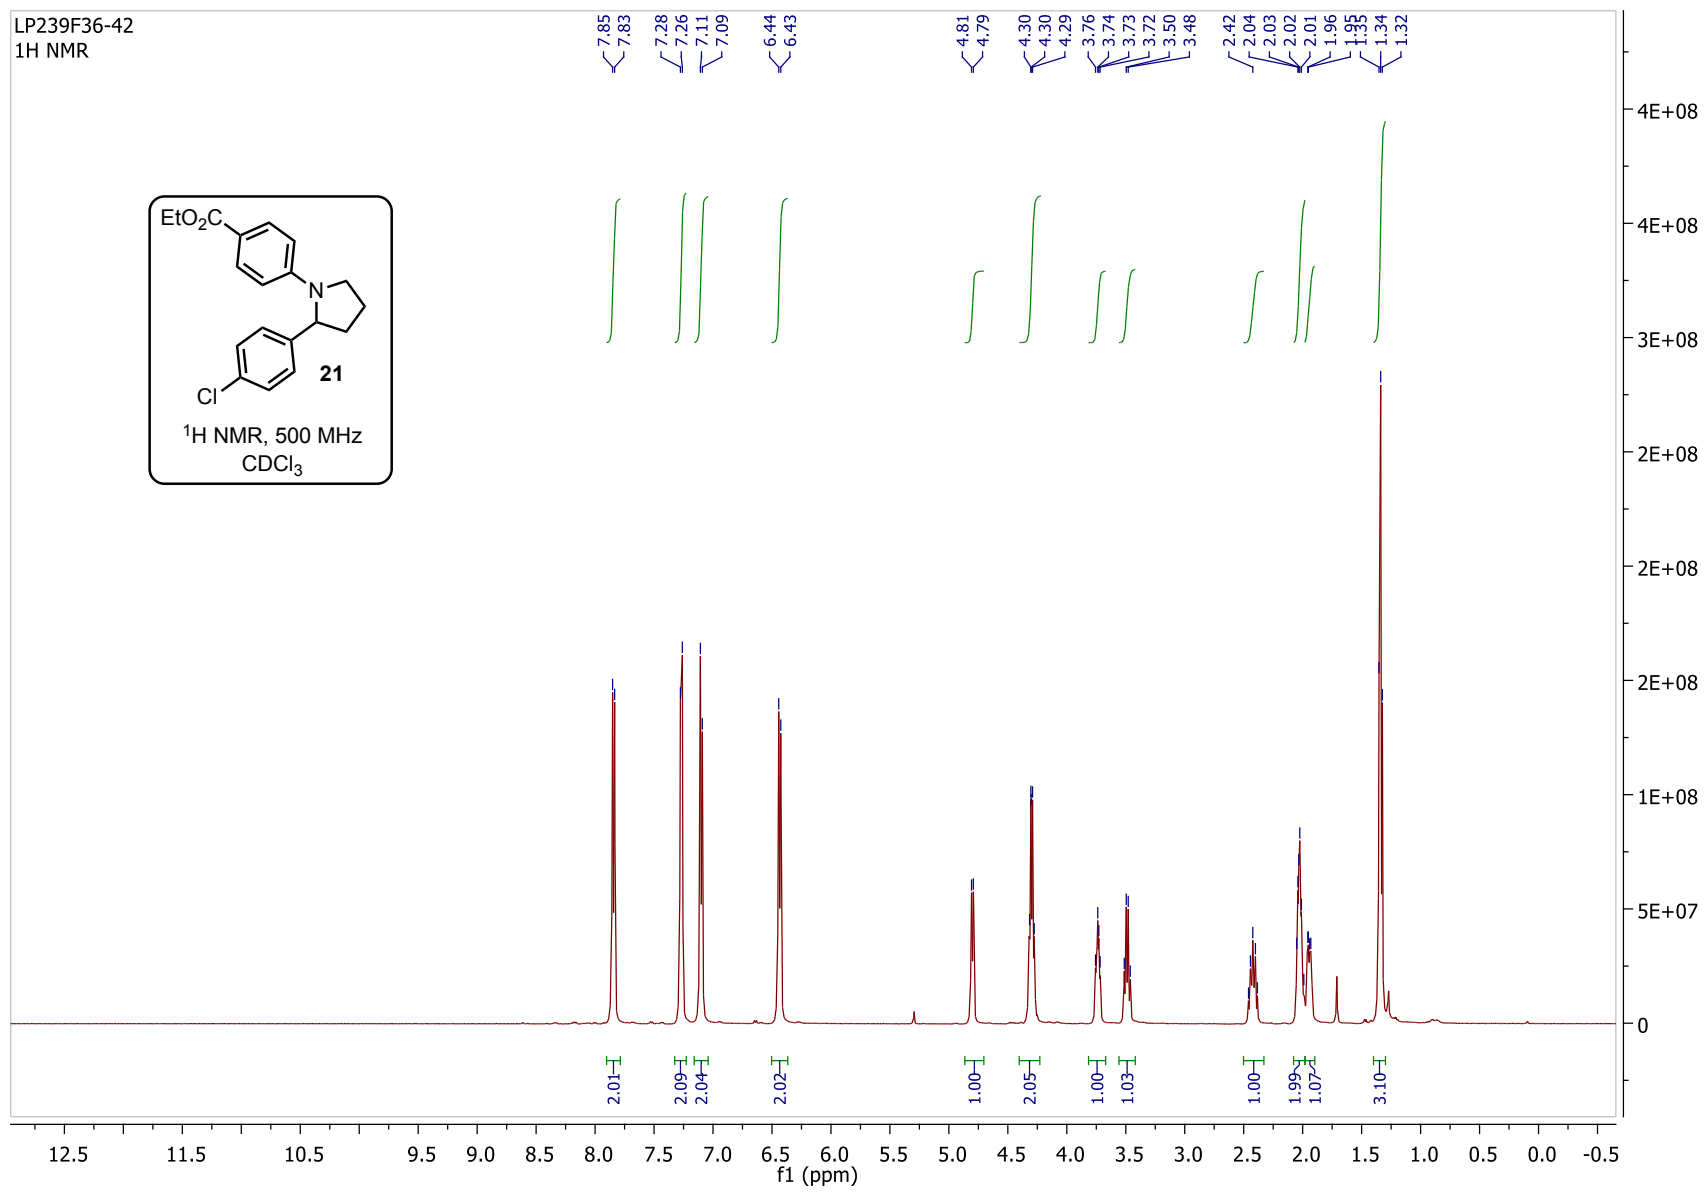

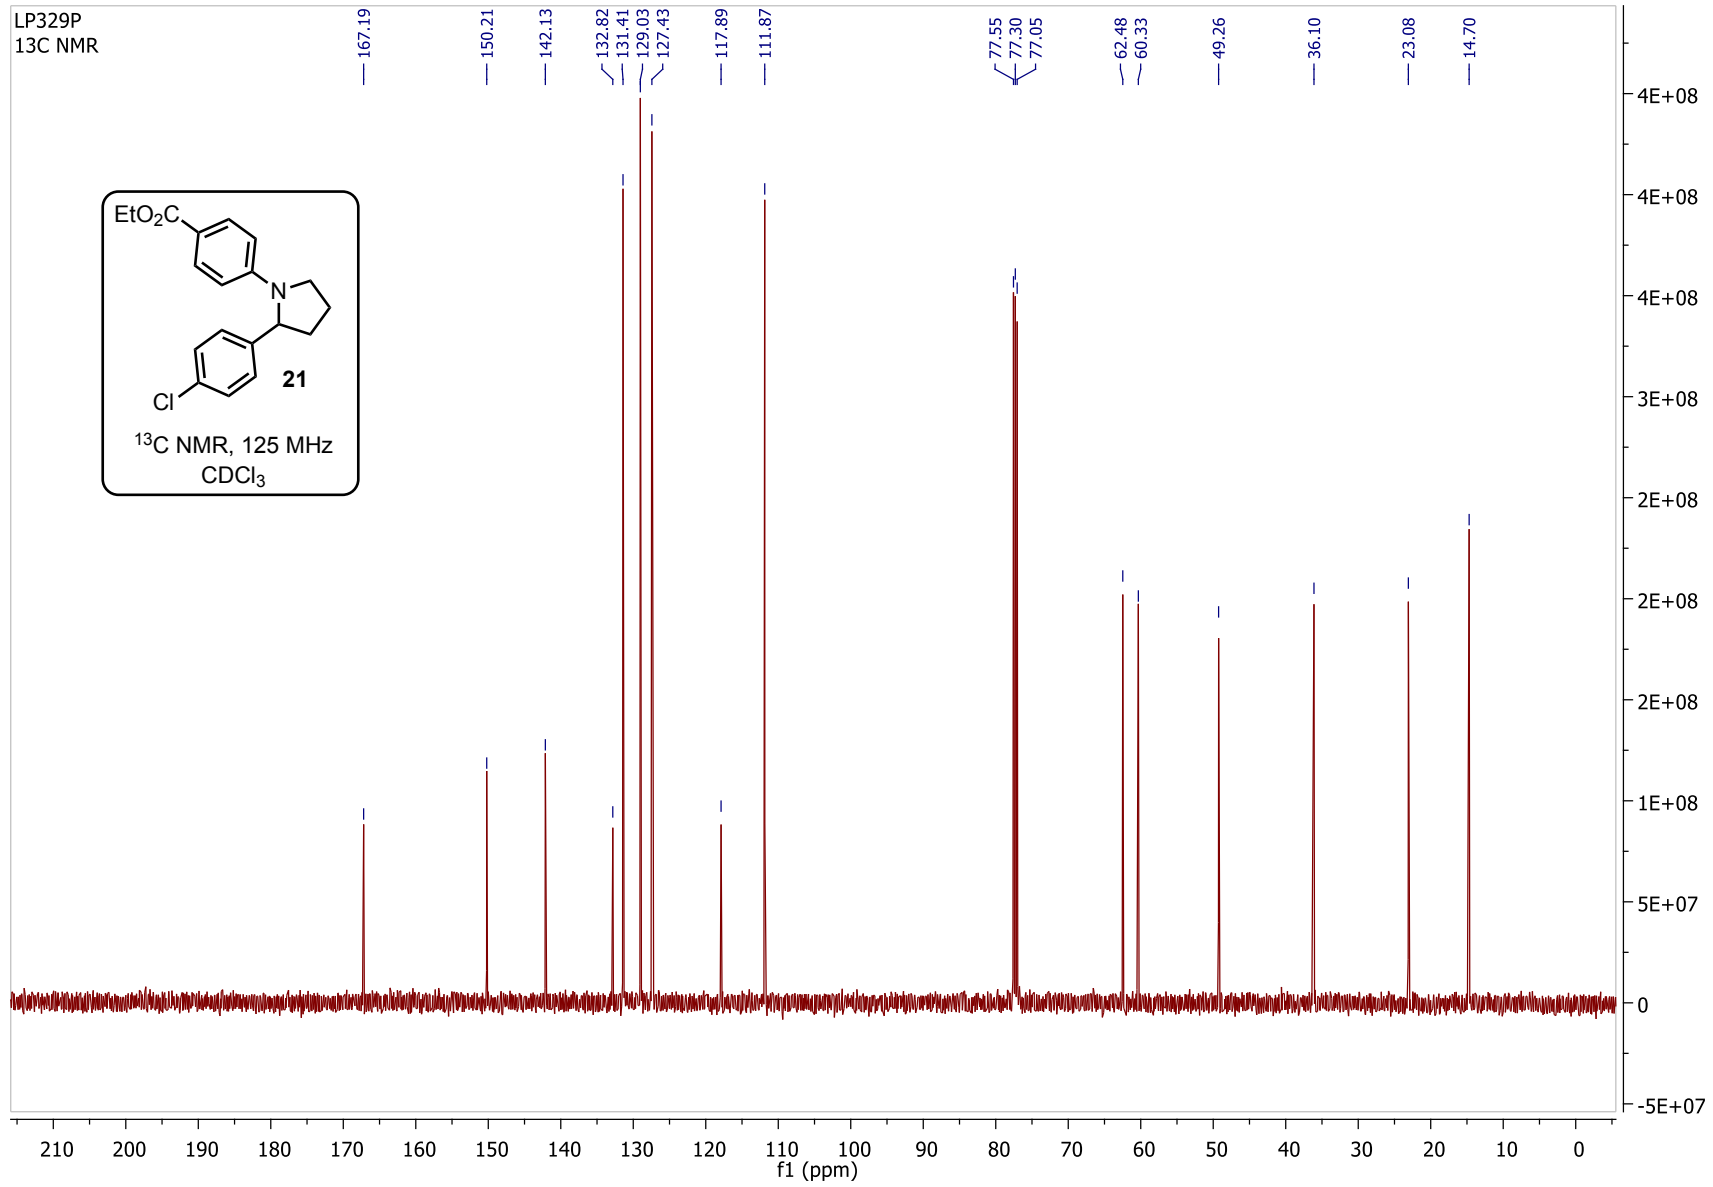

LP193P  
1H NMR

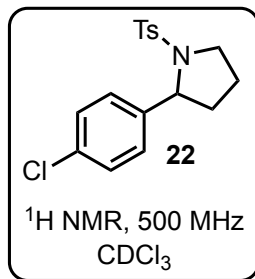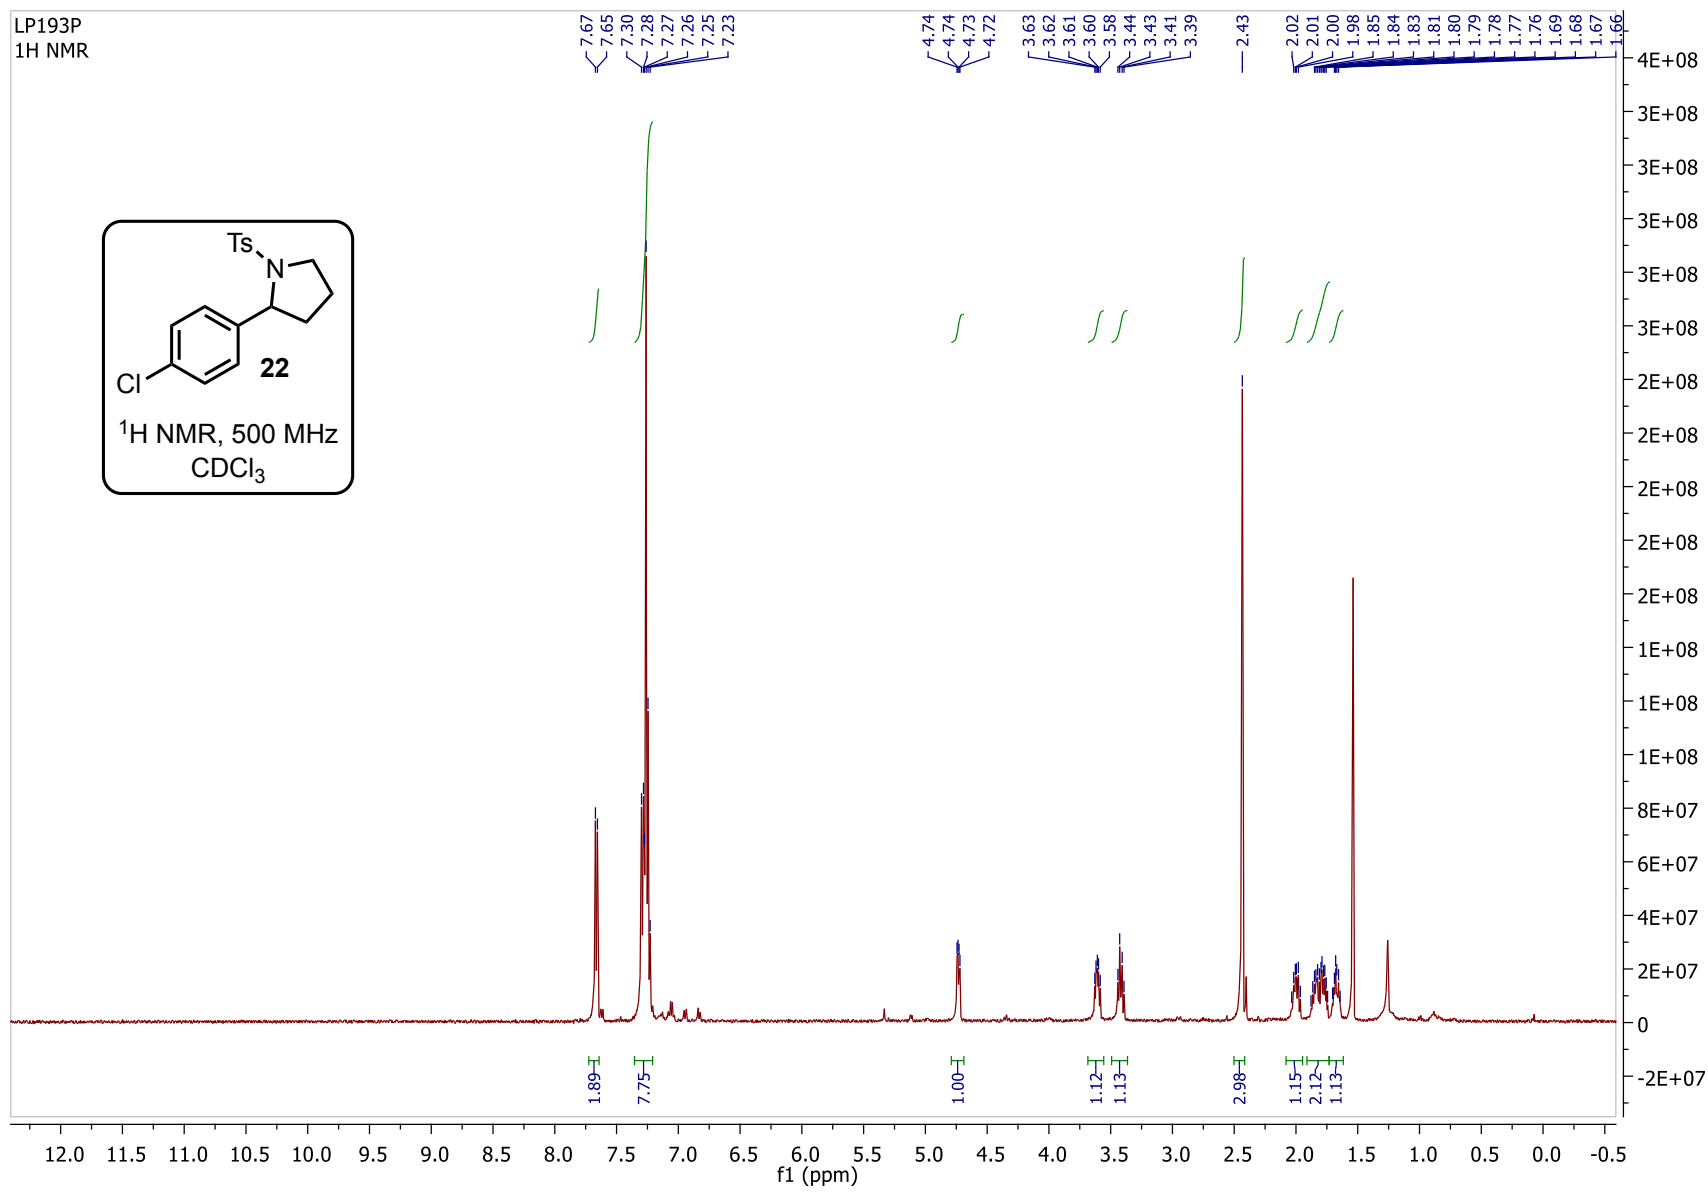



LP193P2  
13C NMR

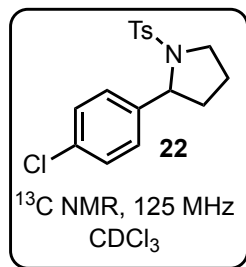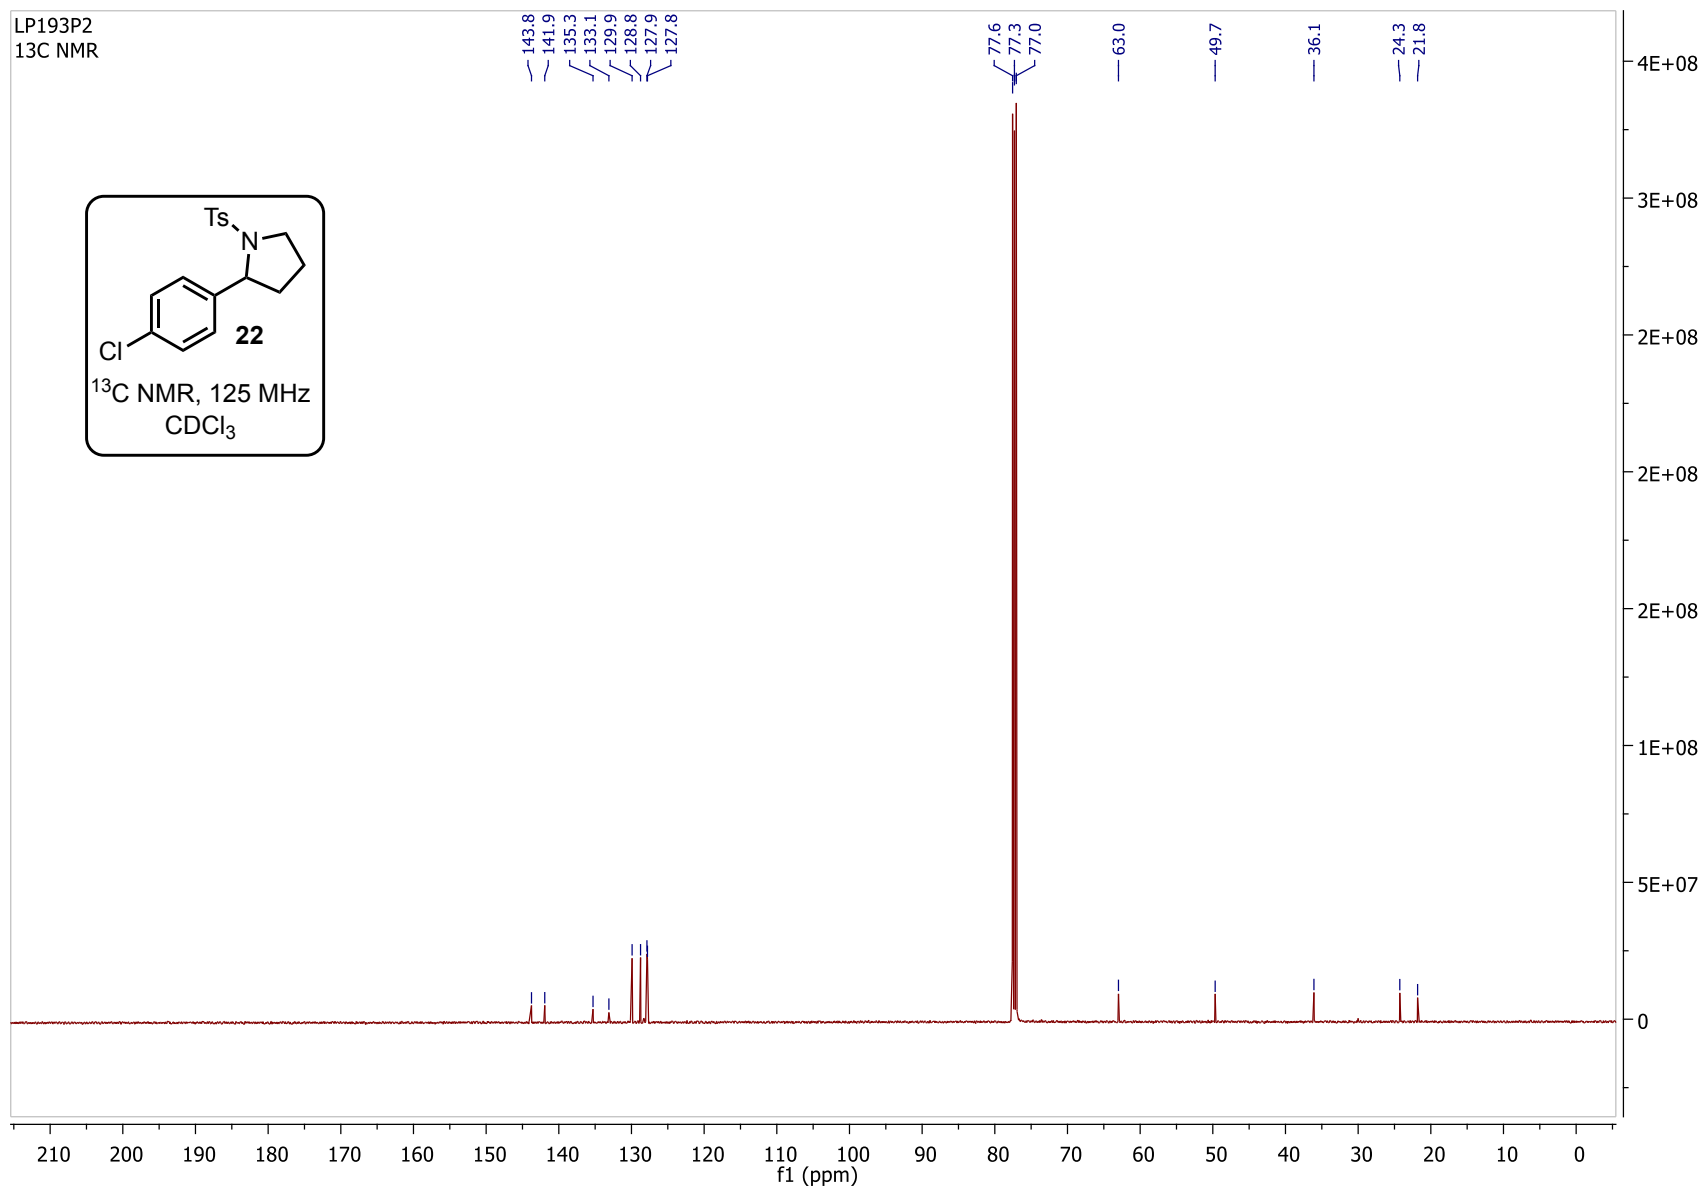

LP282P1  
1H NMR

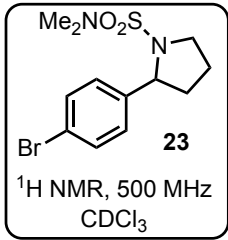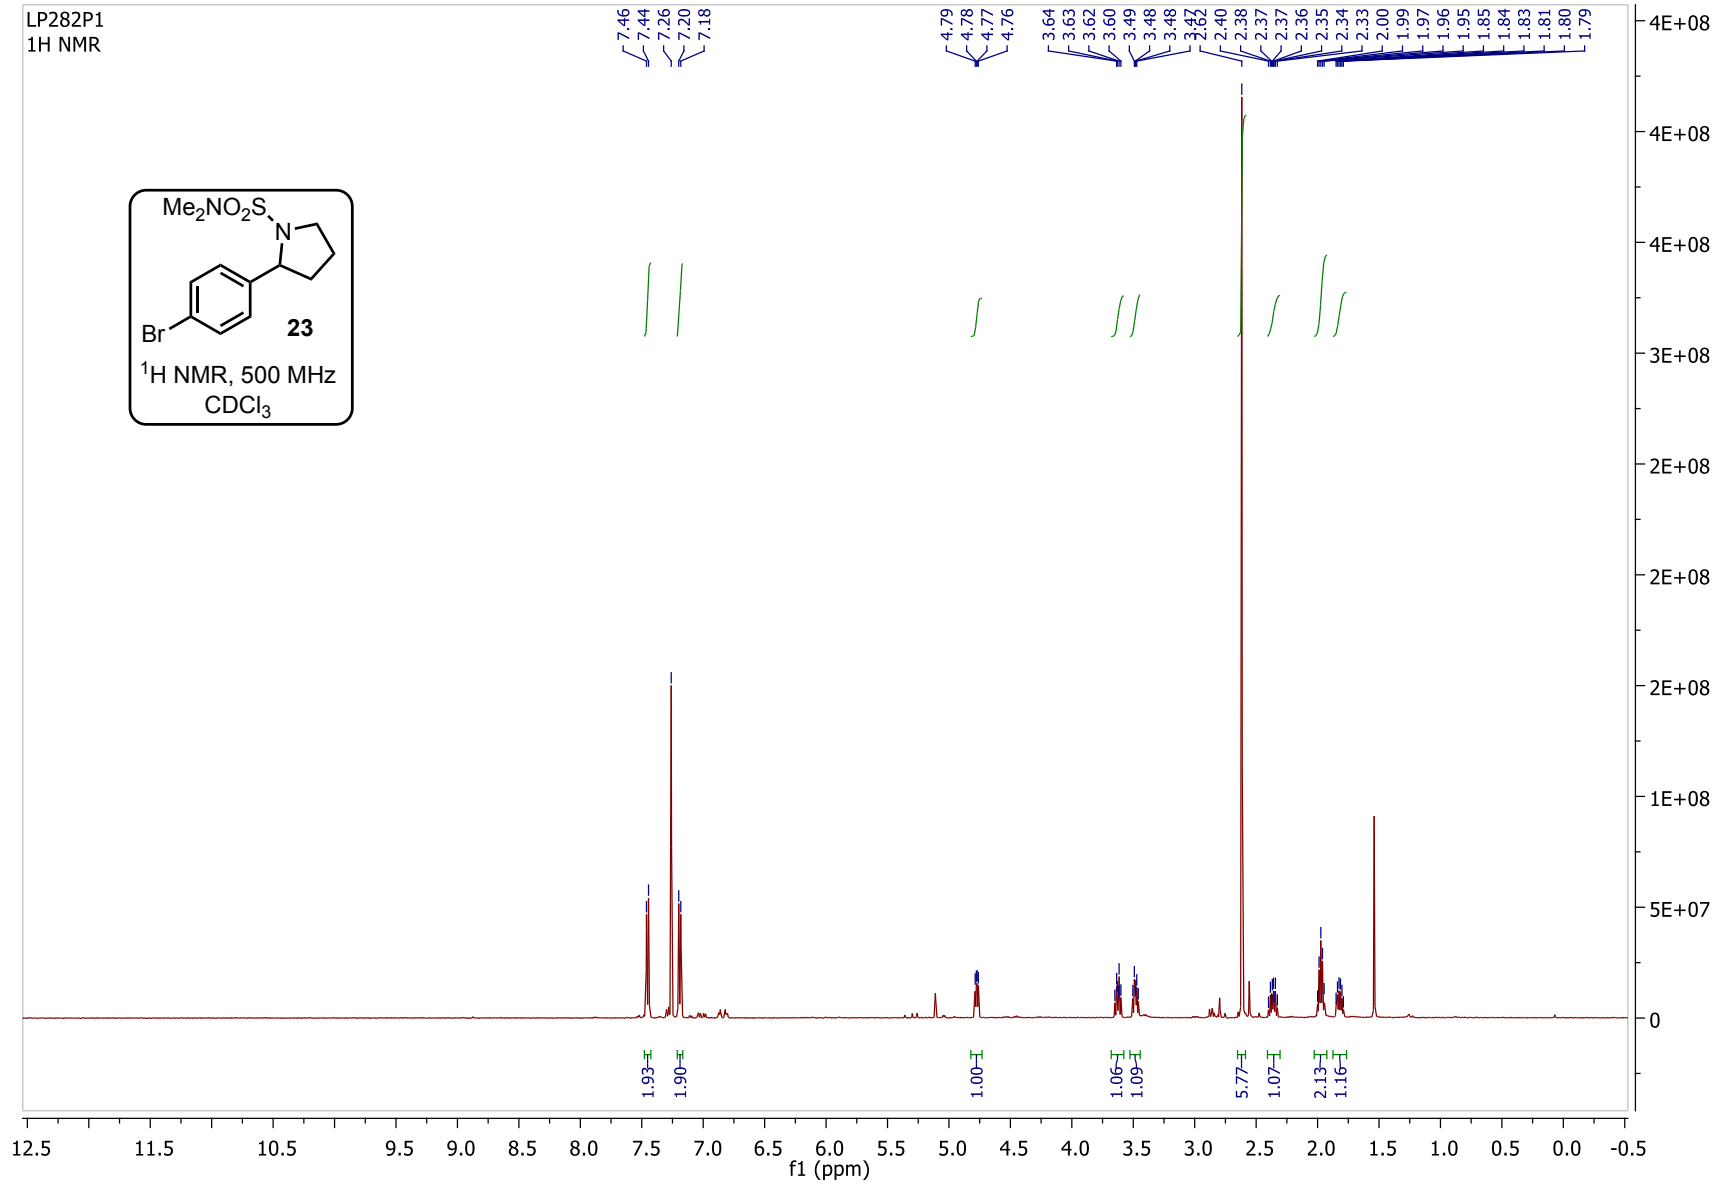

LP282P1  
1H NMR

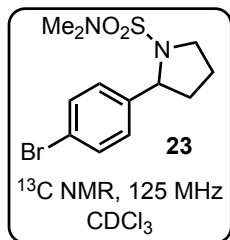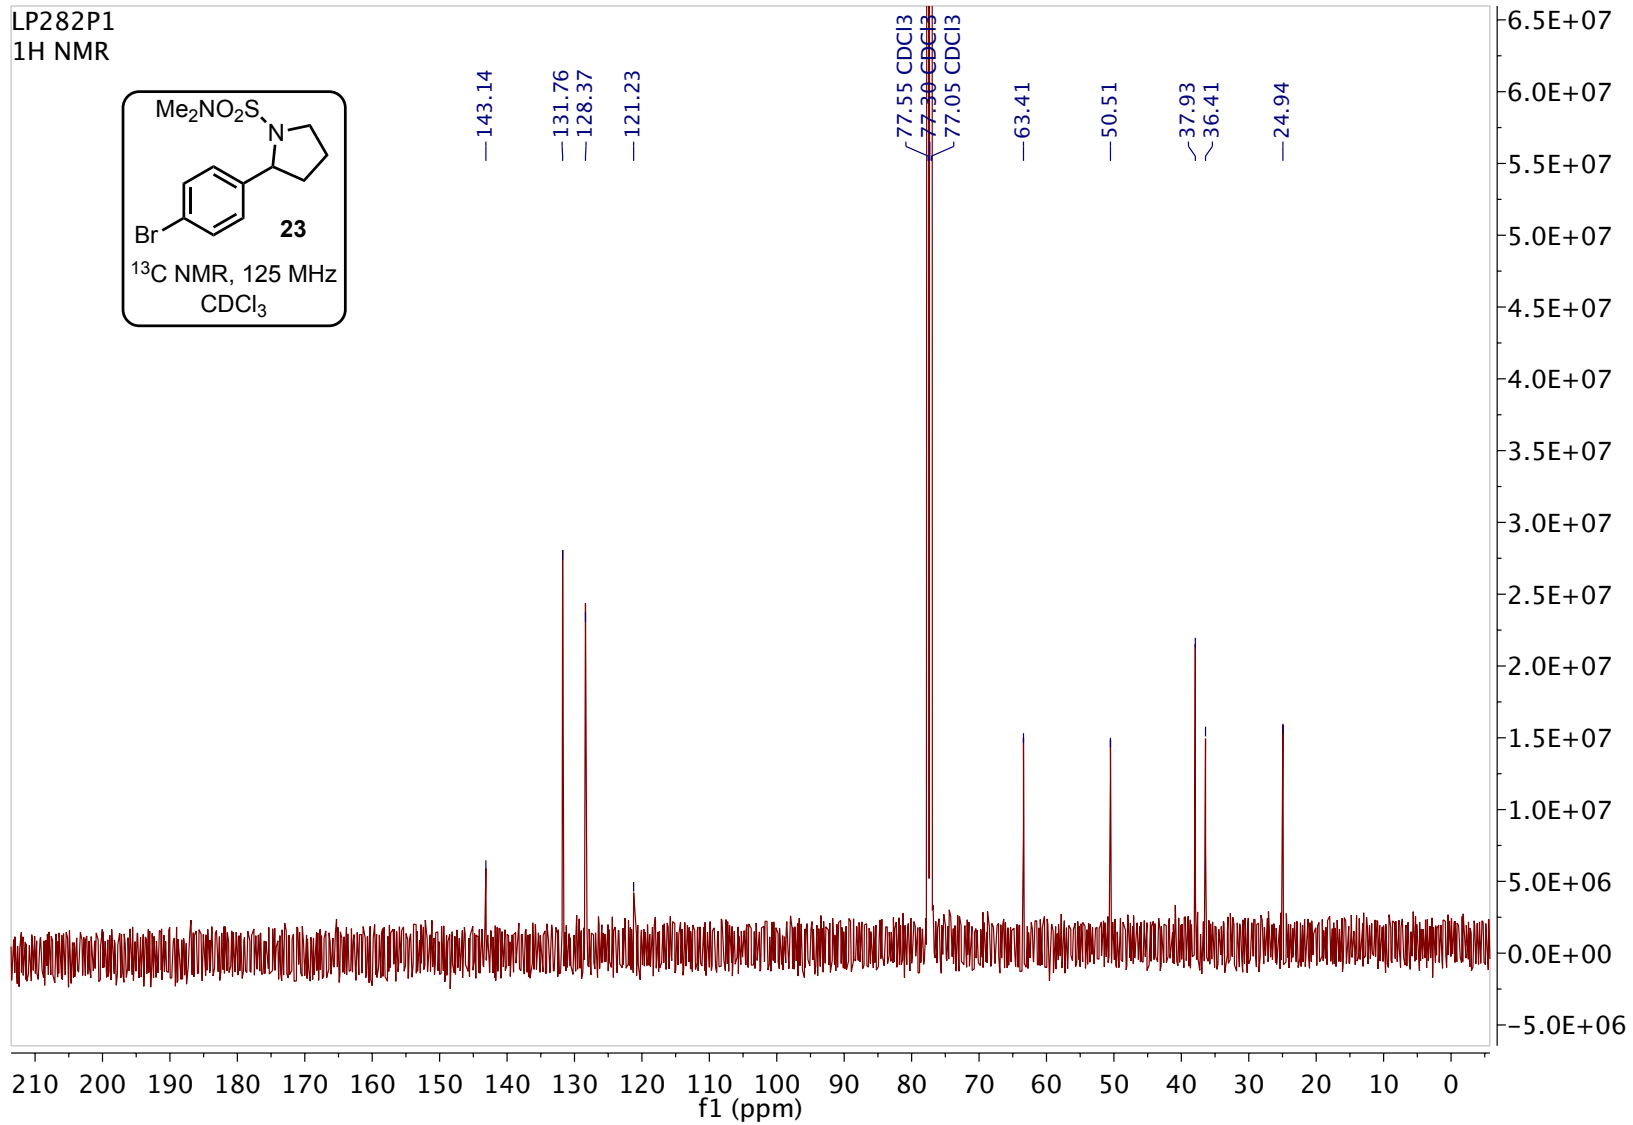

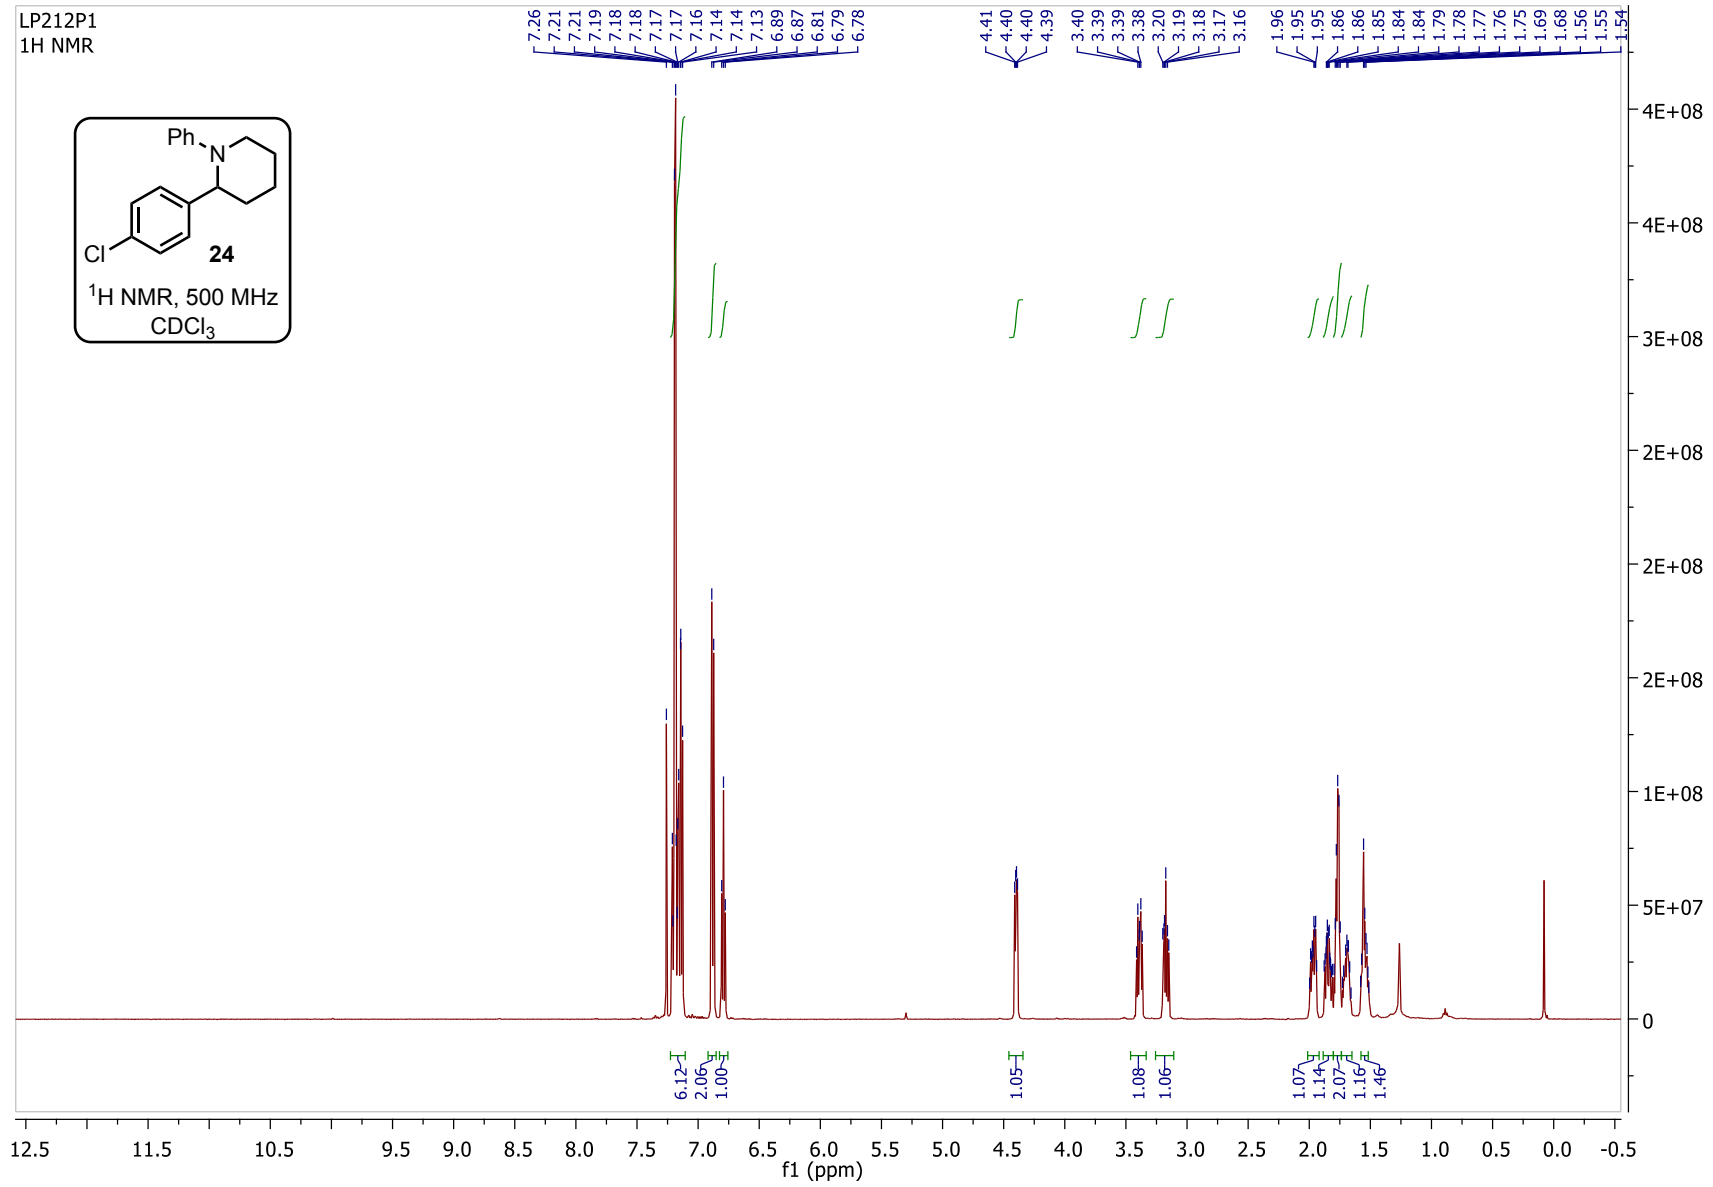

LP212P1  
13C NMR

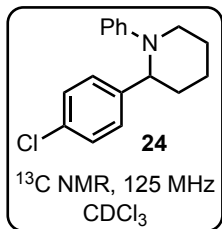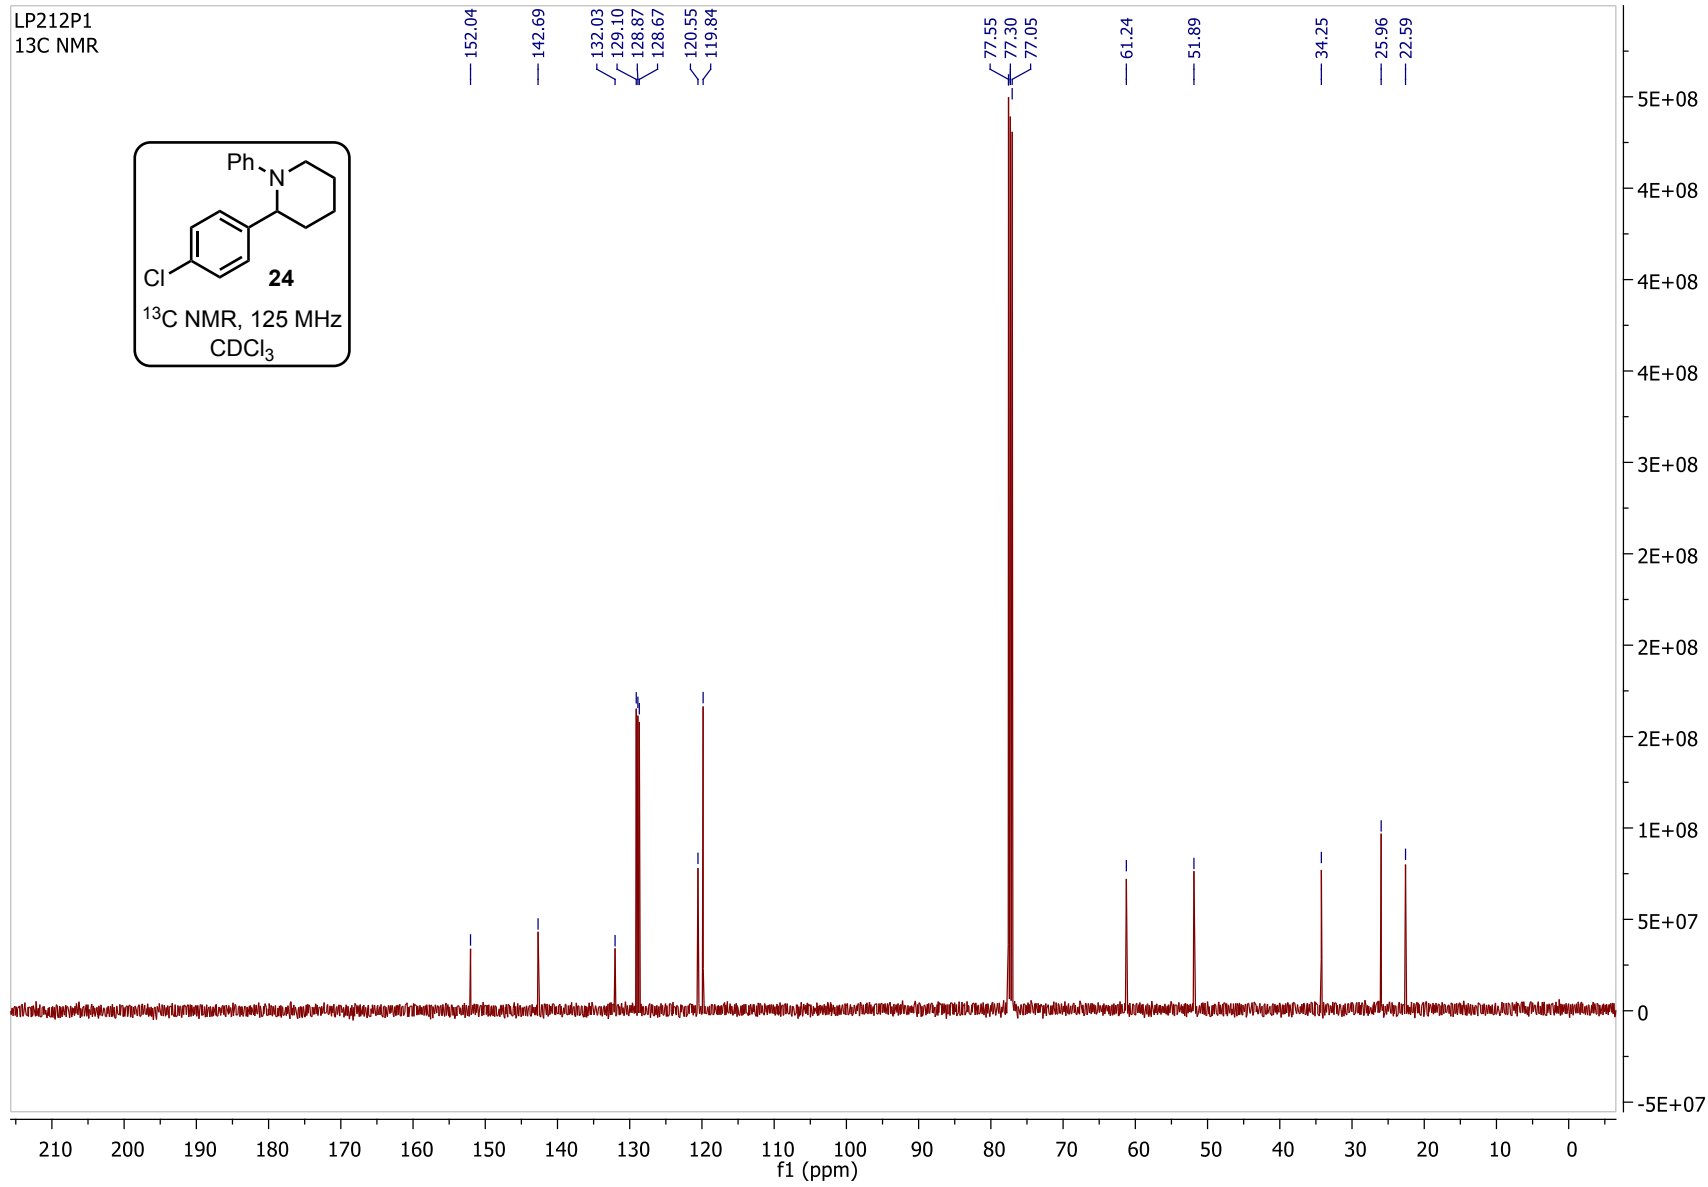

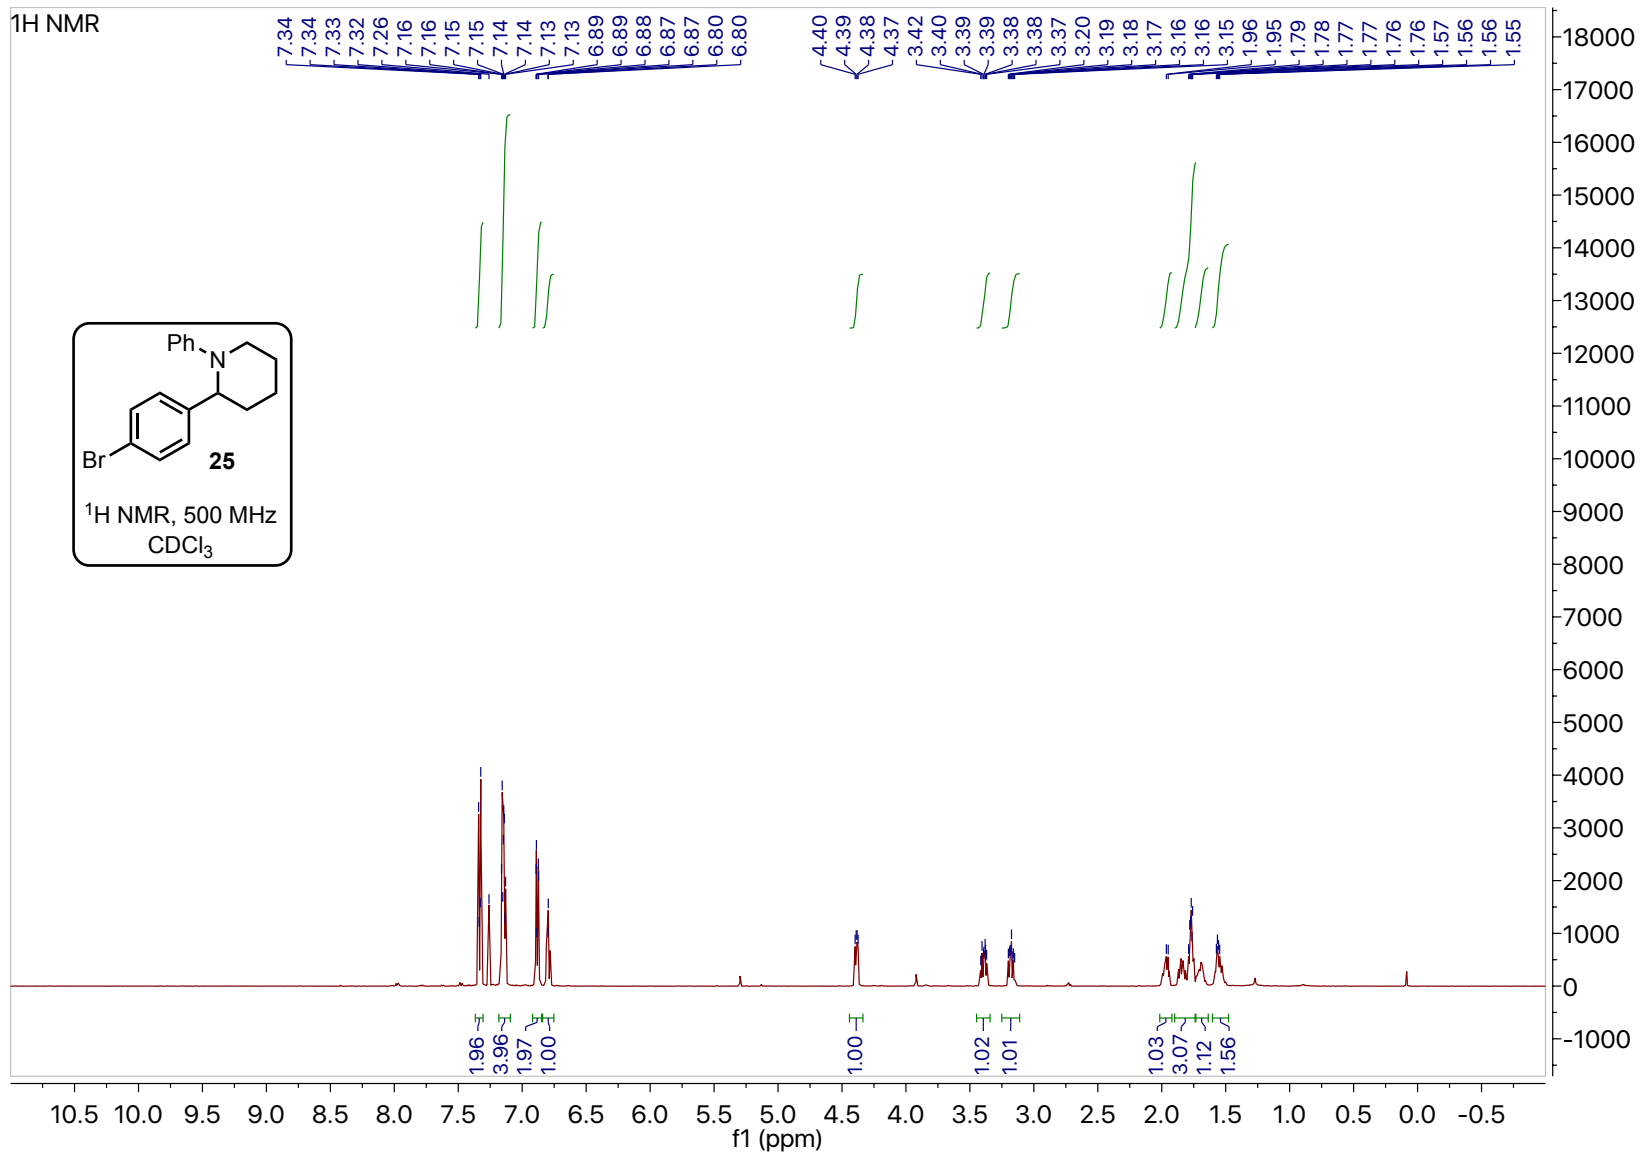

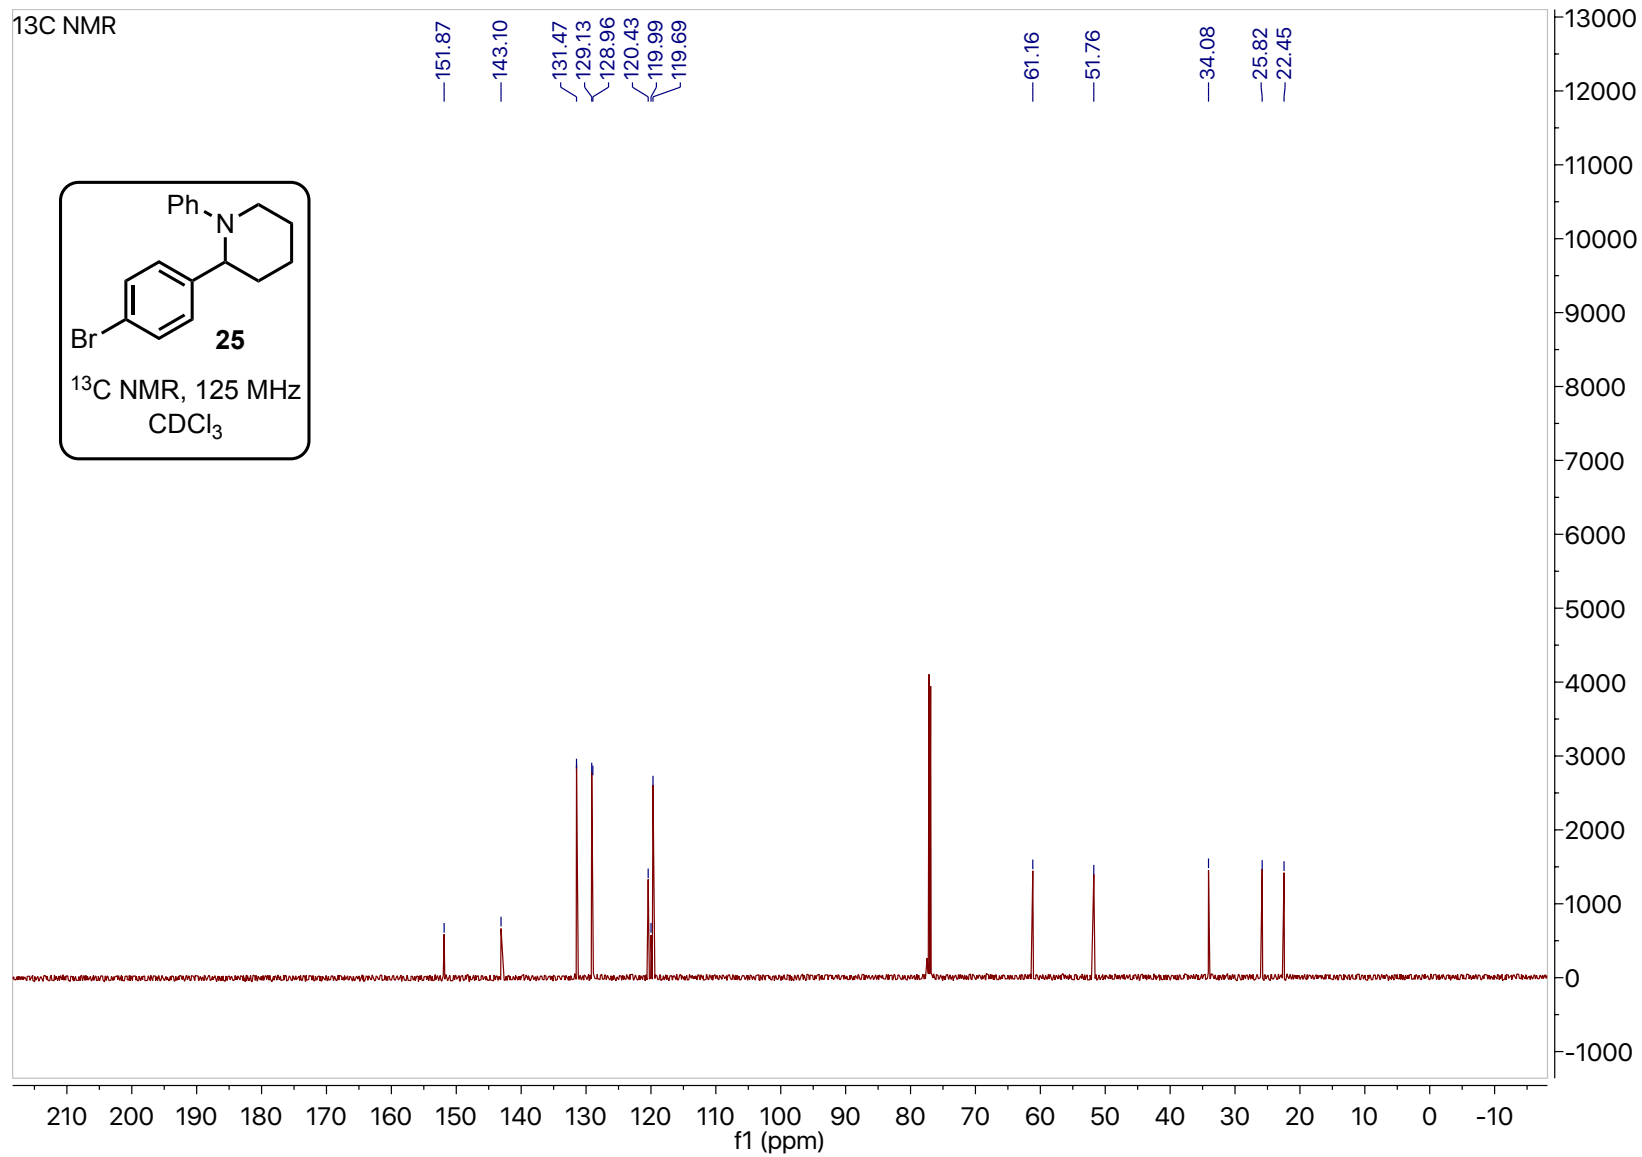

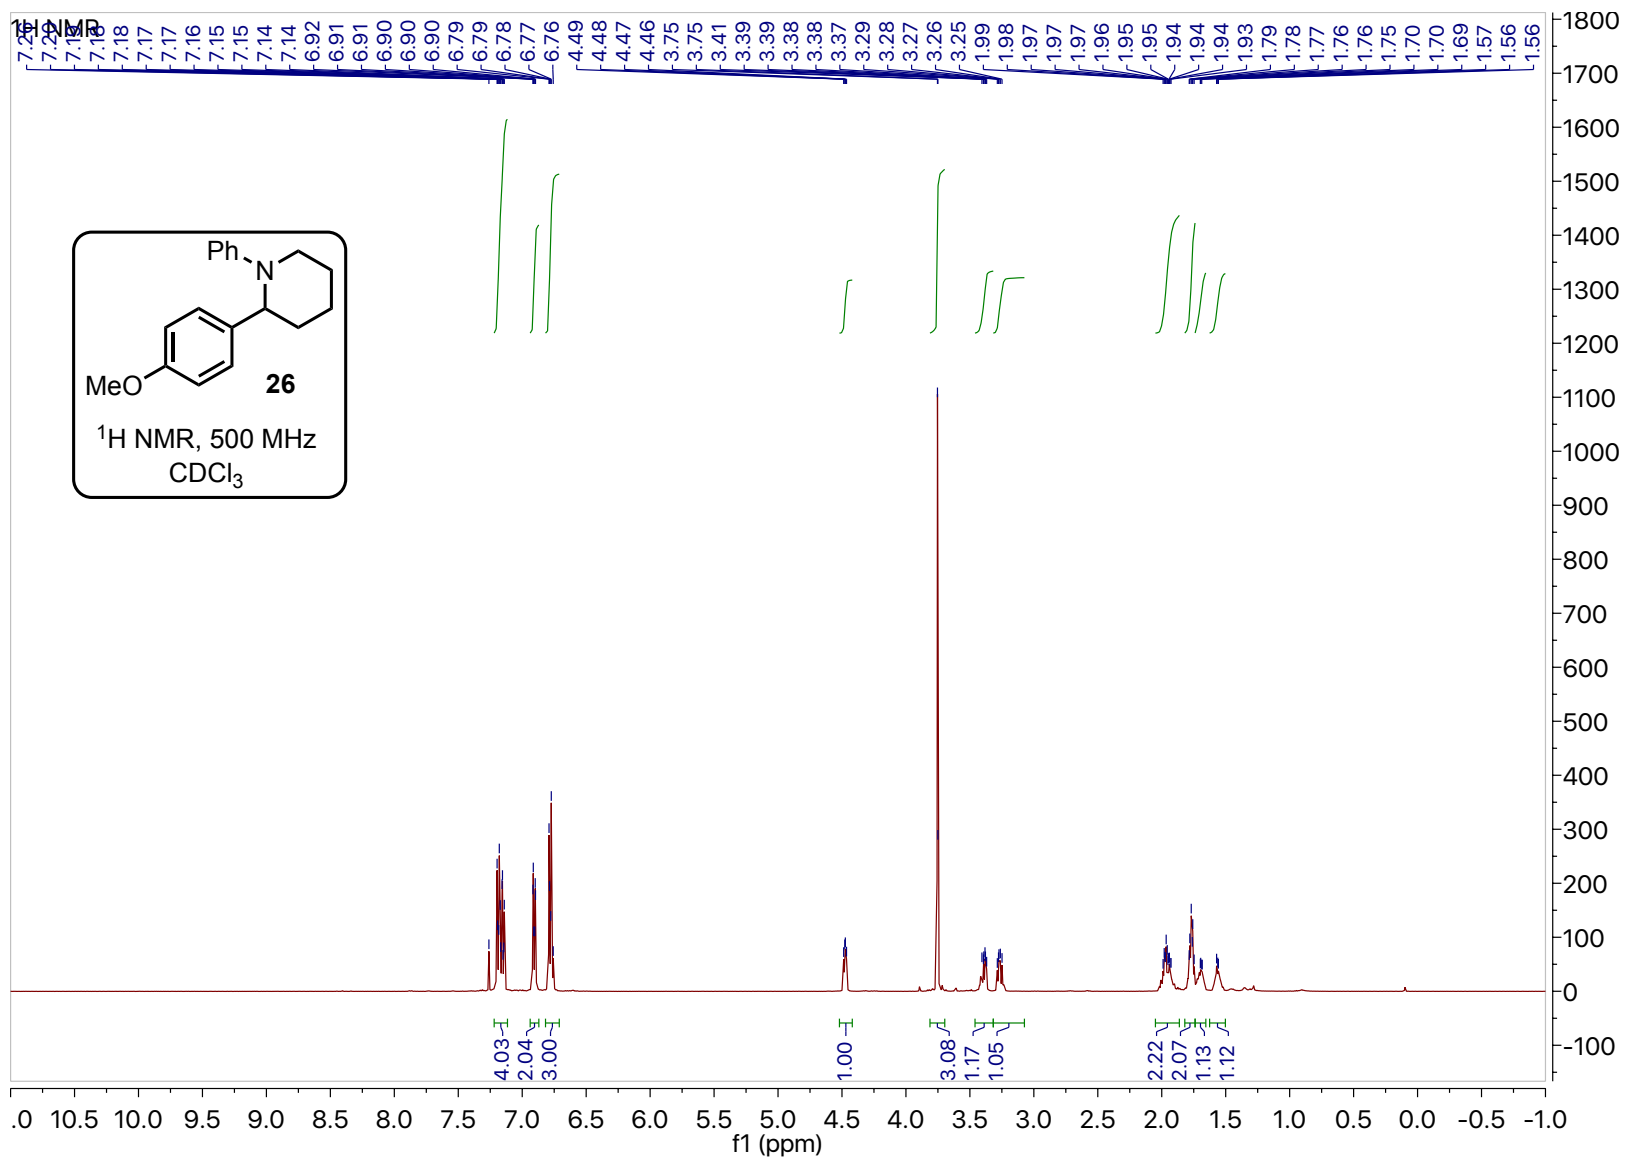



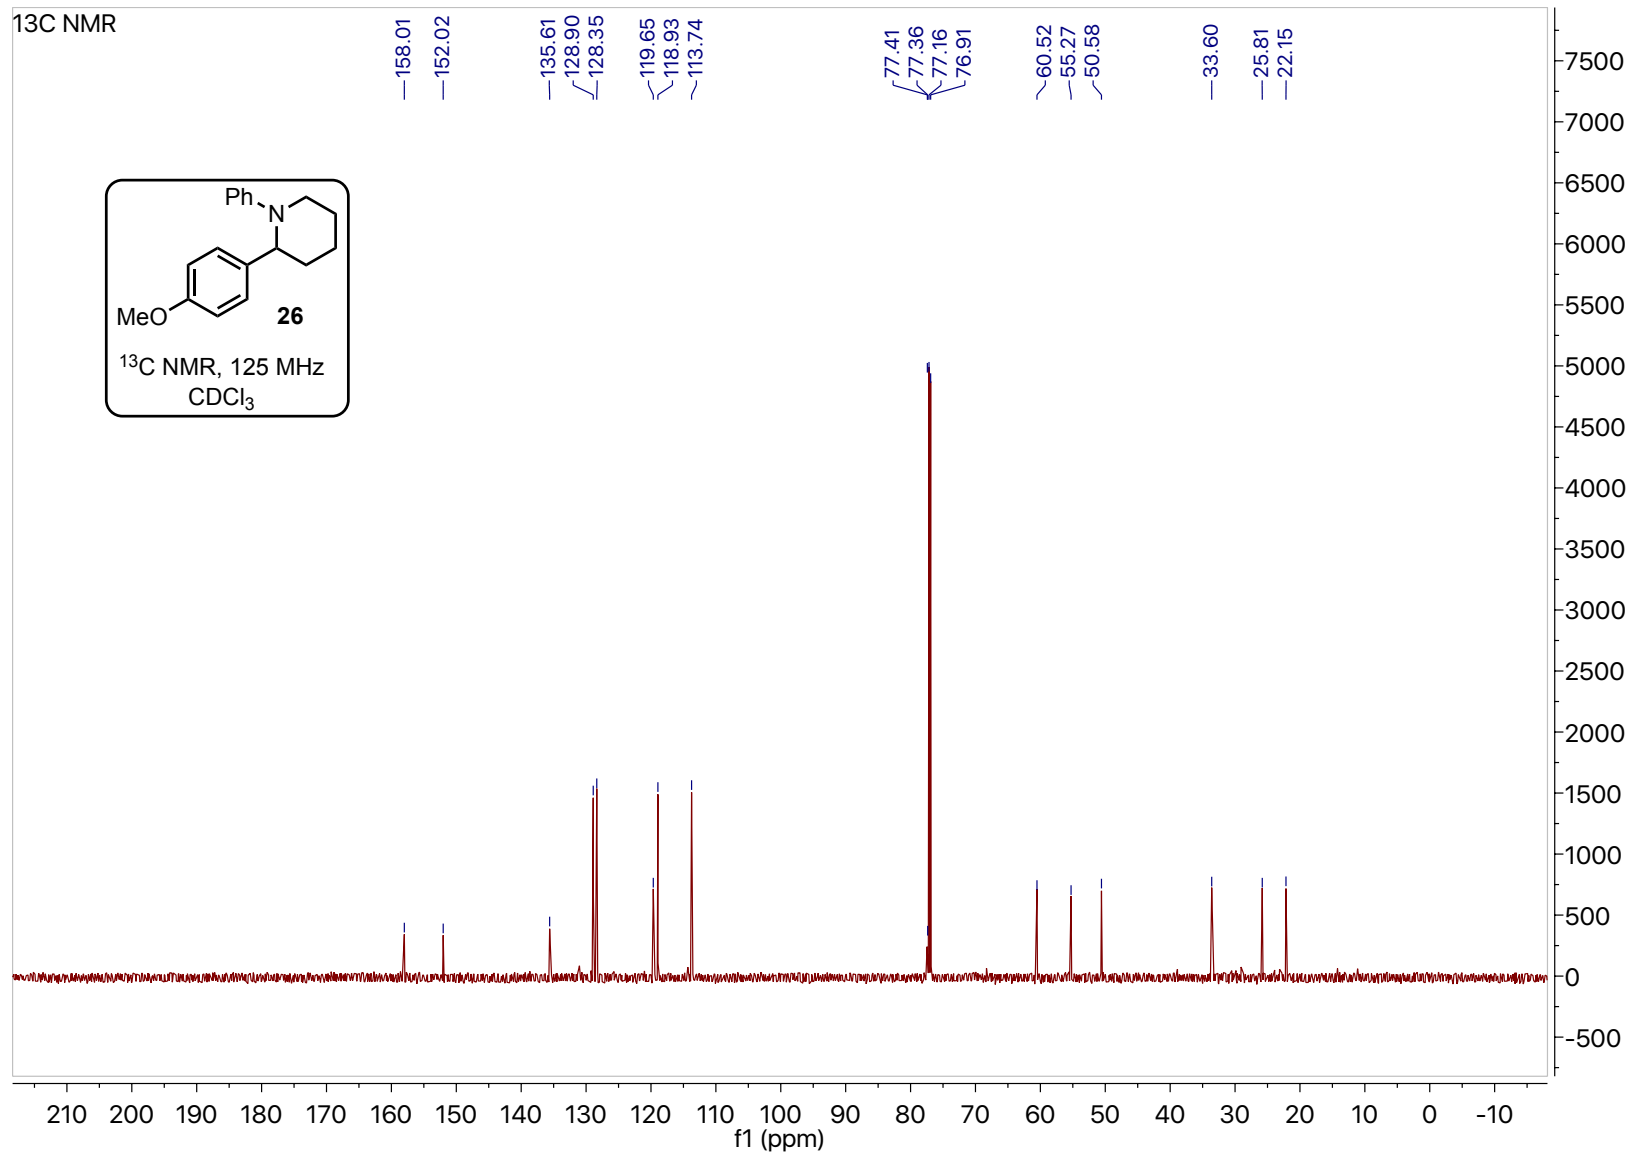



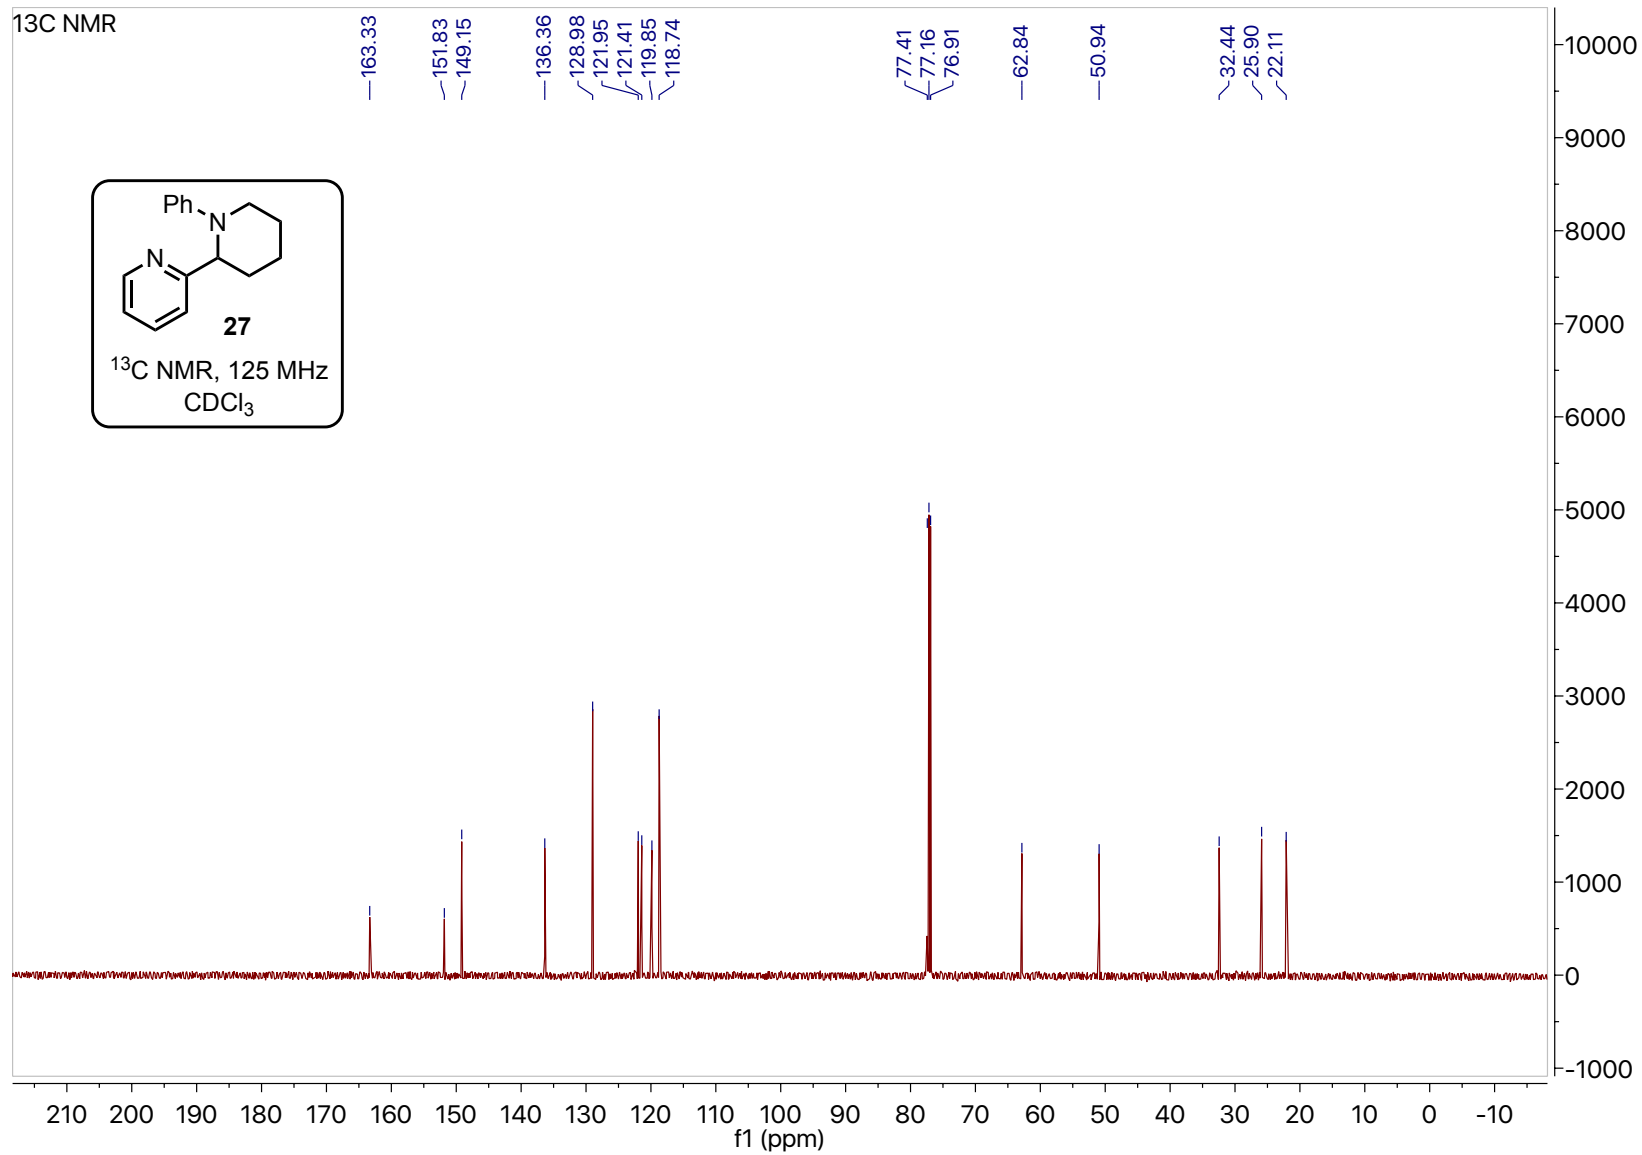

LP278P2  
1H NMR

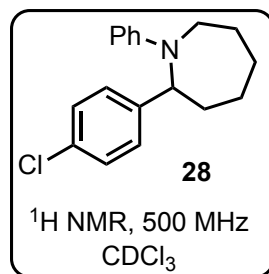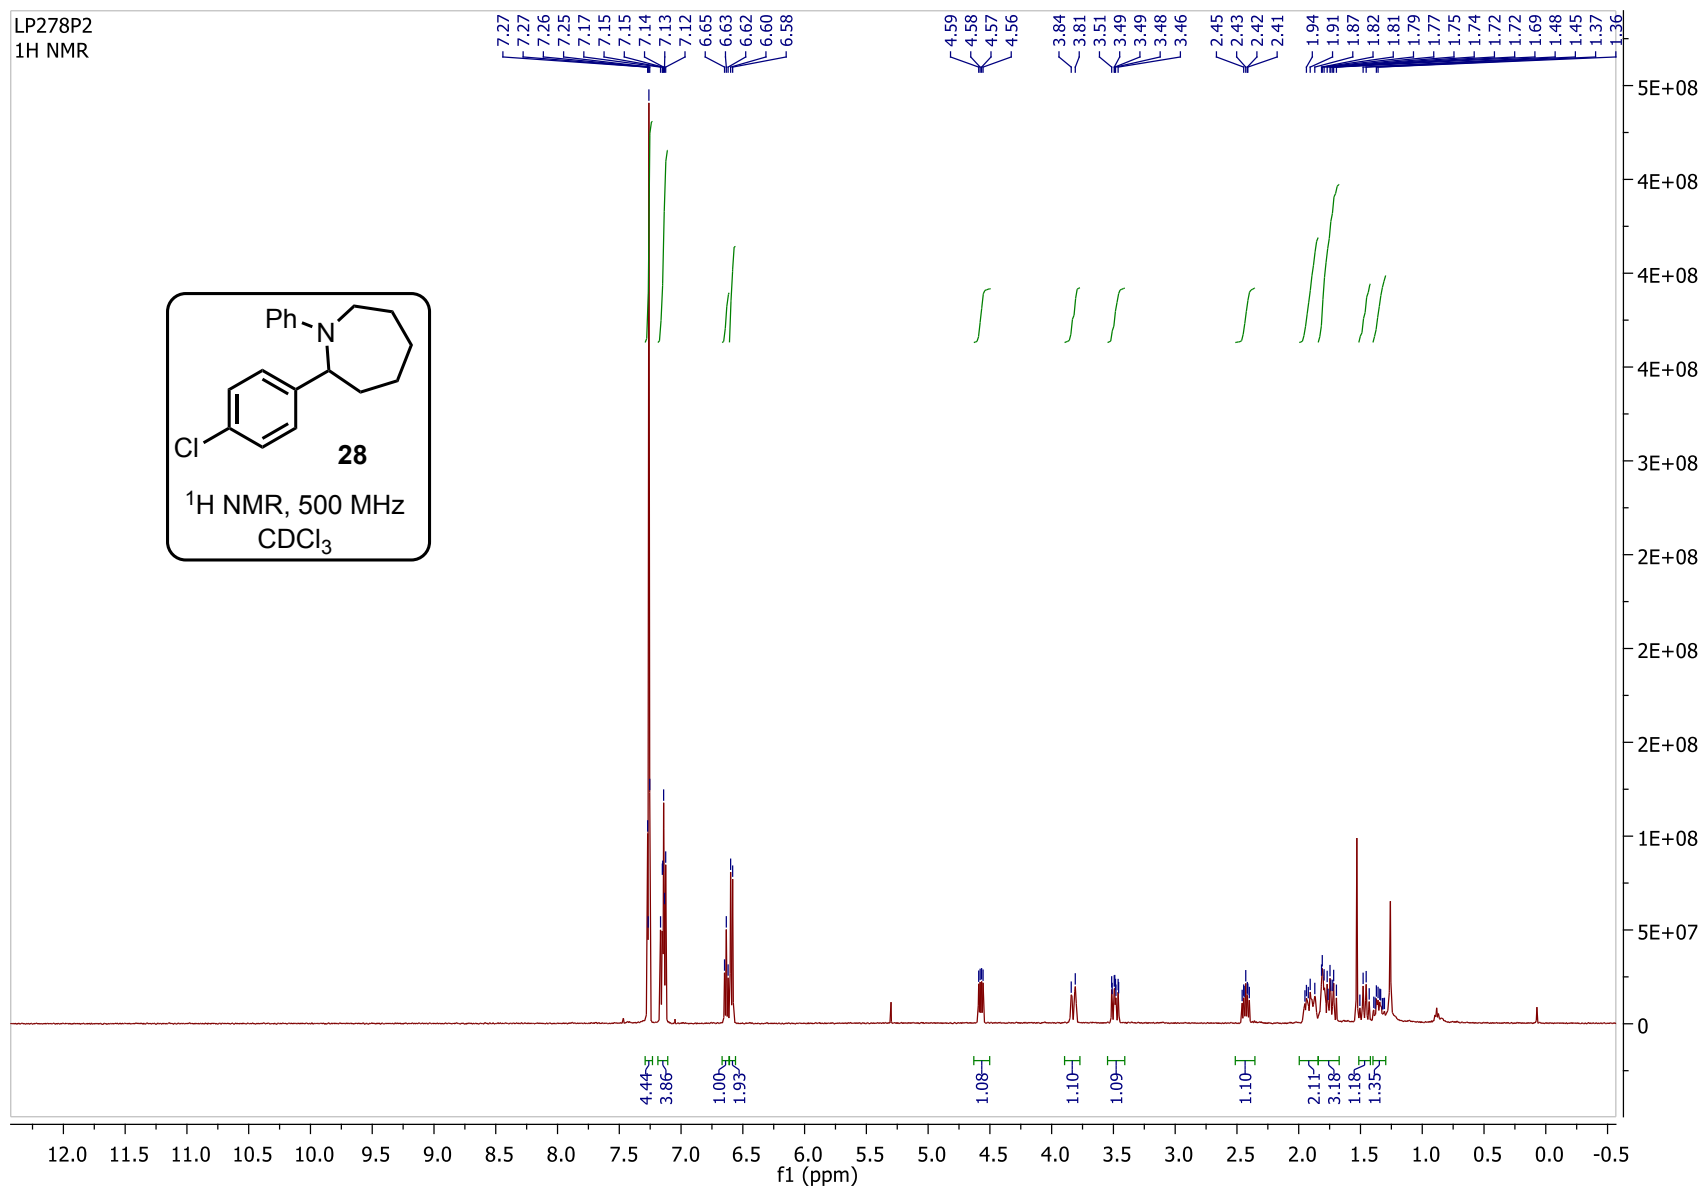

LP278P1  
13C NMR

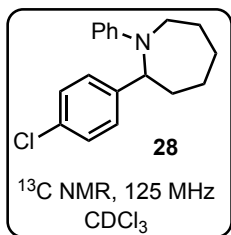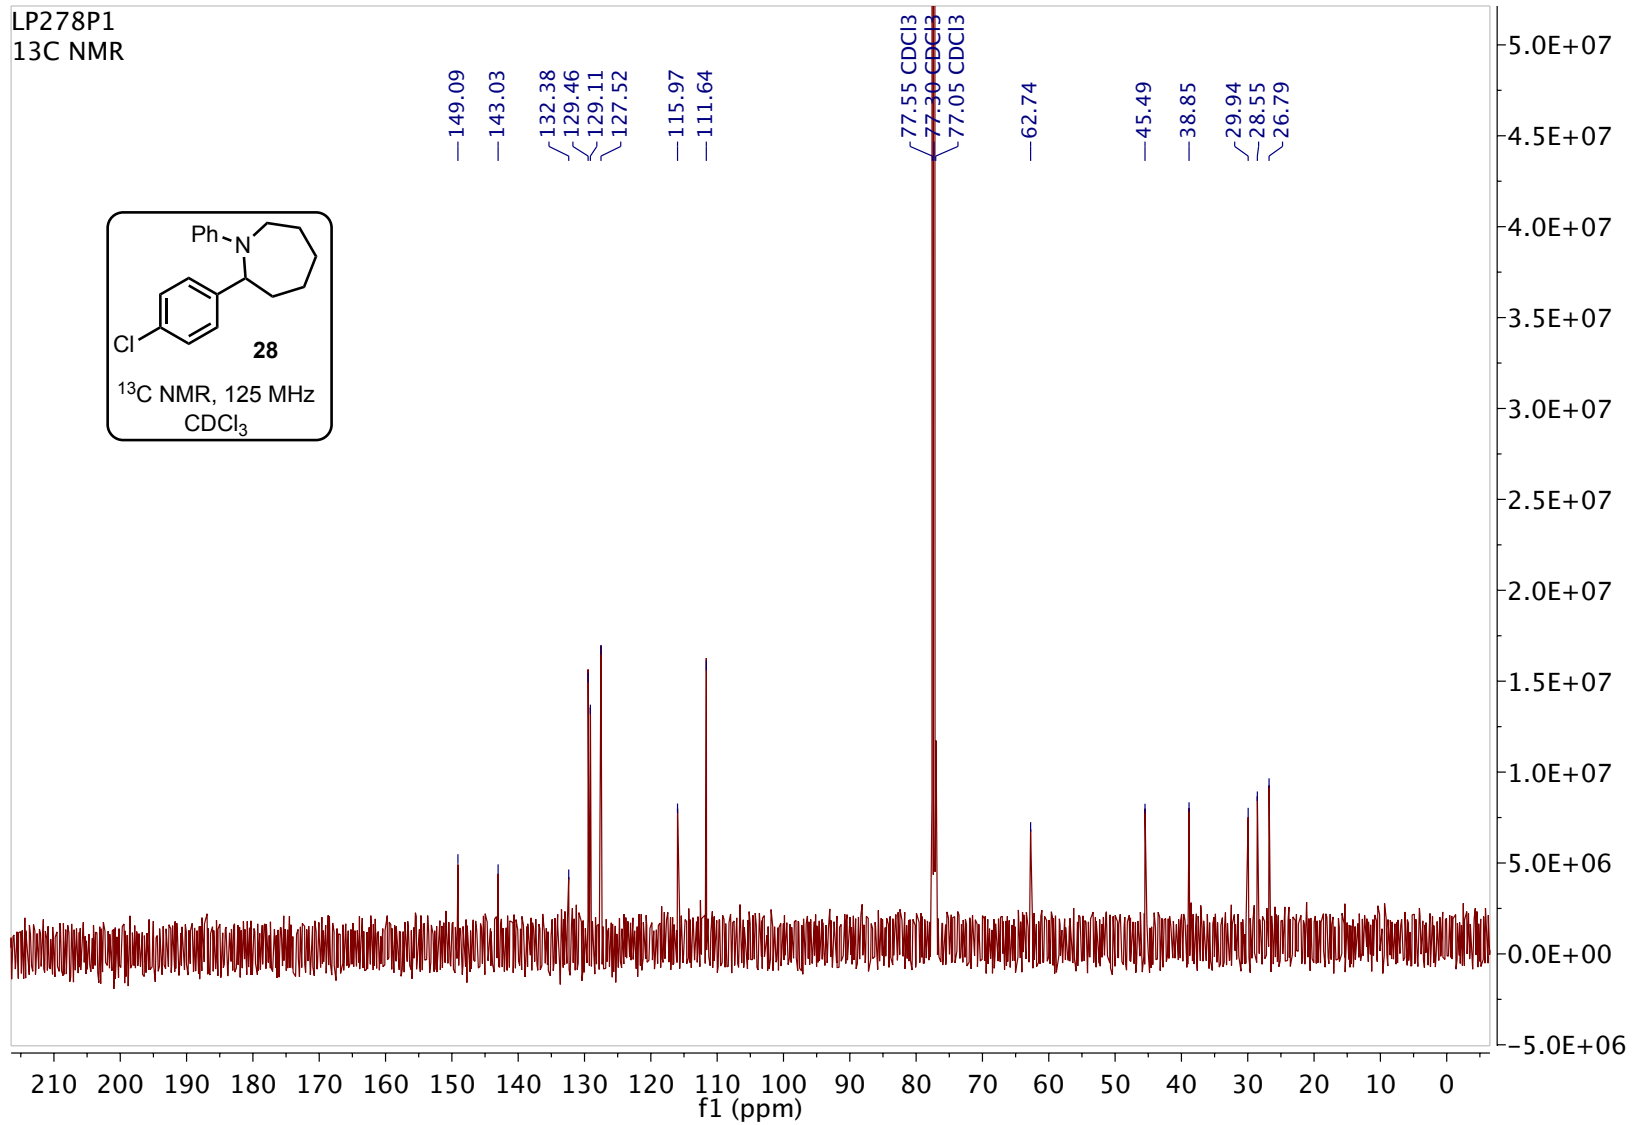

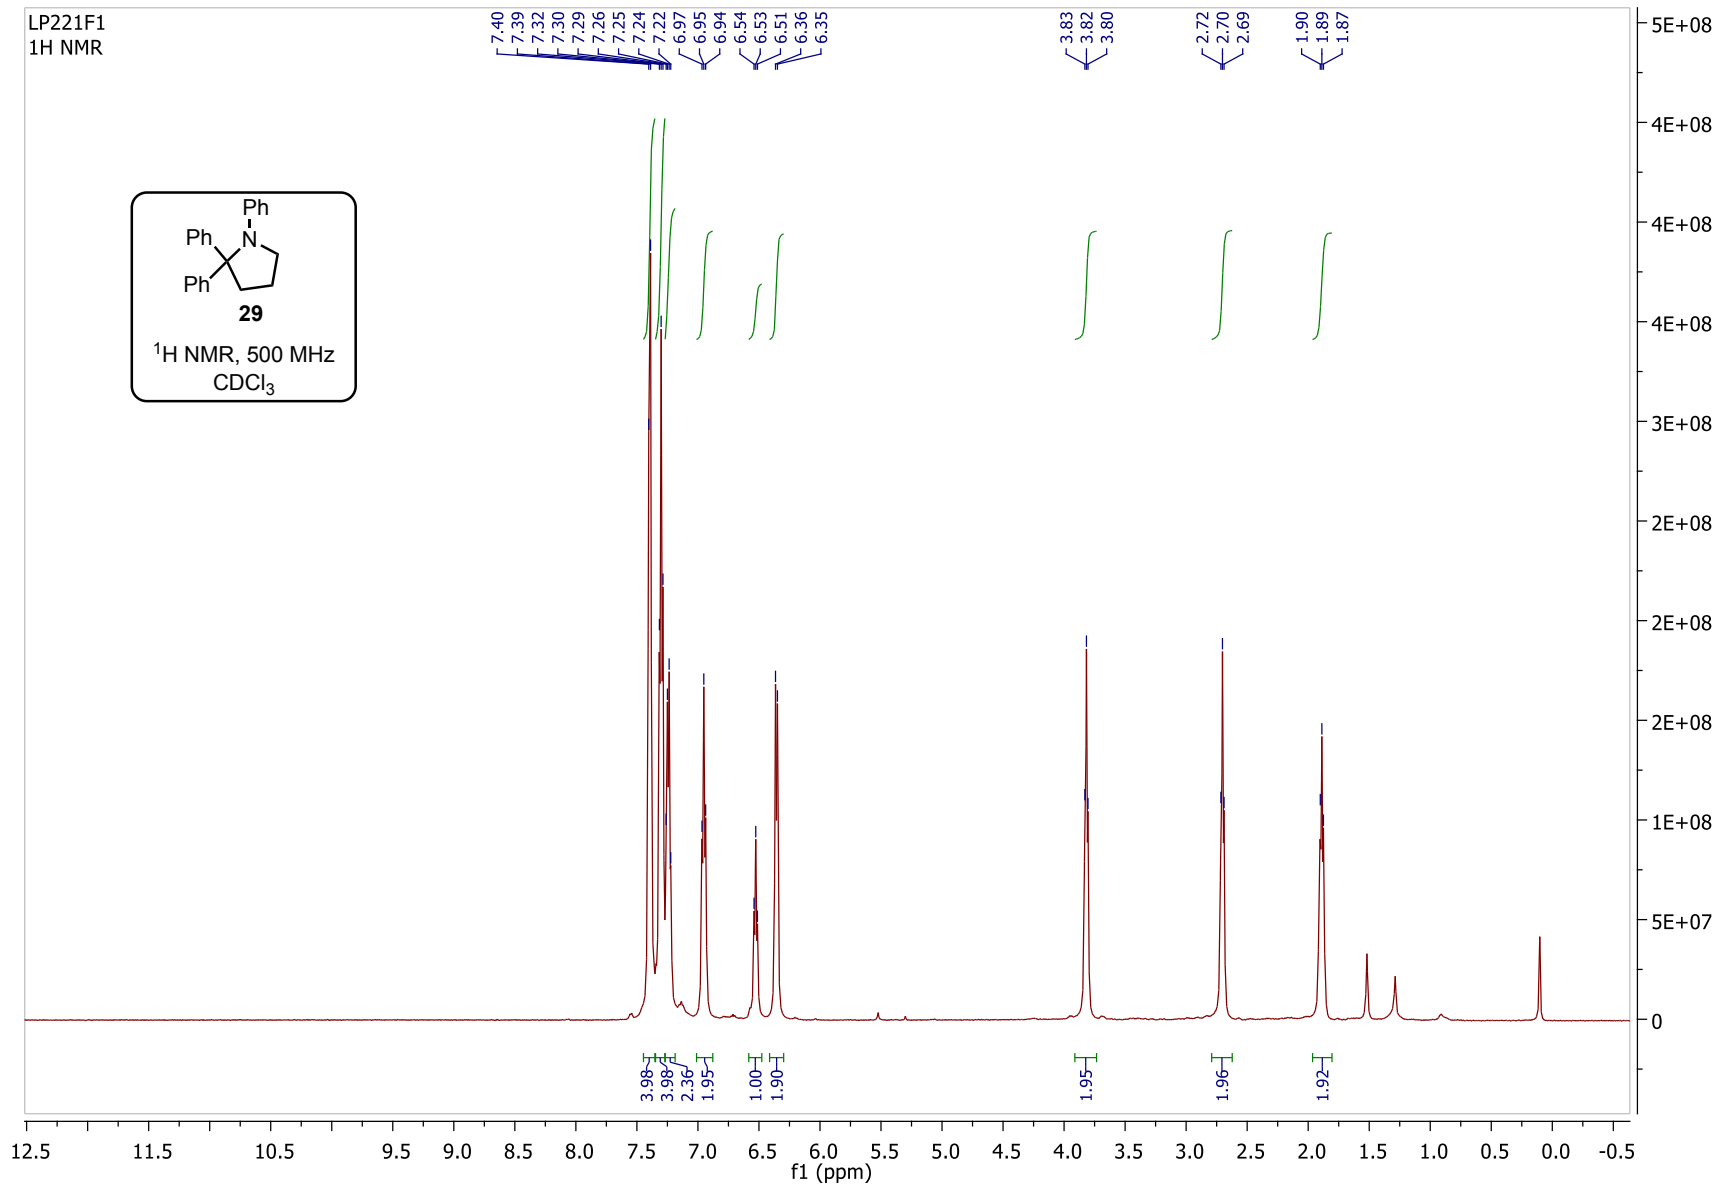

LP221F1  
13C NMR

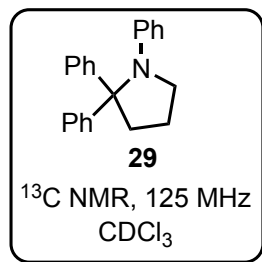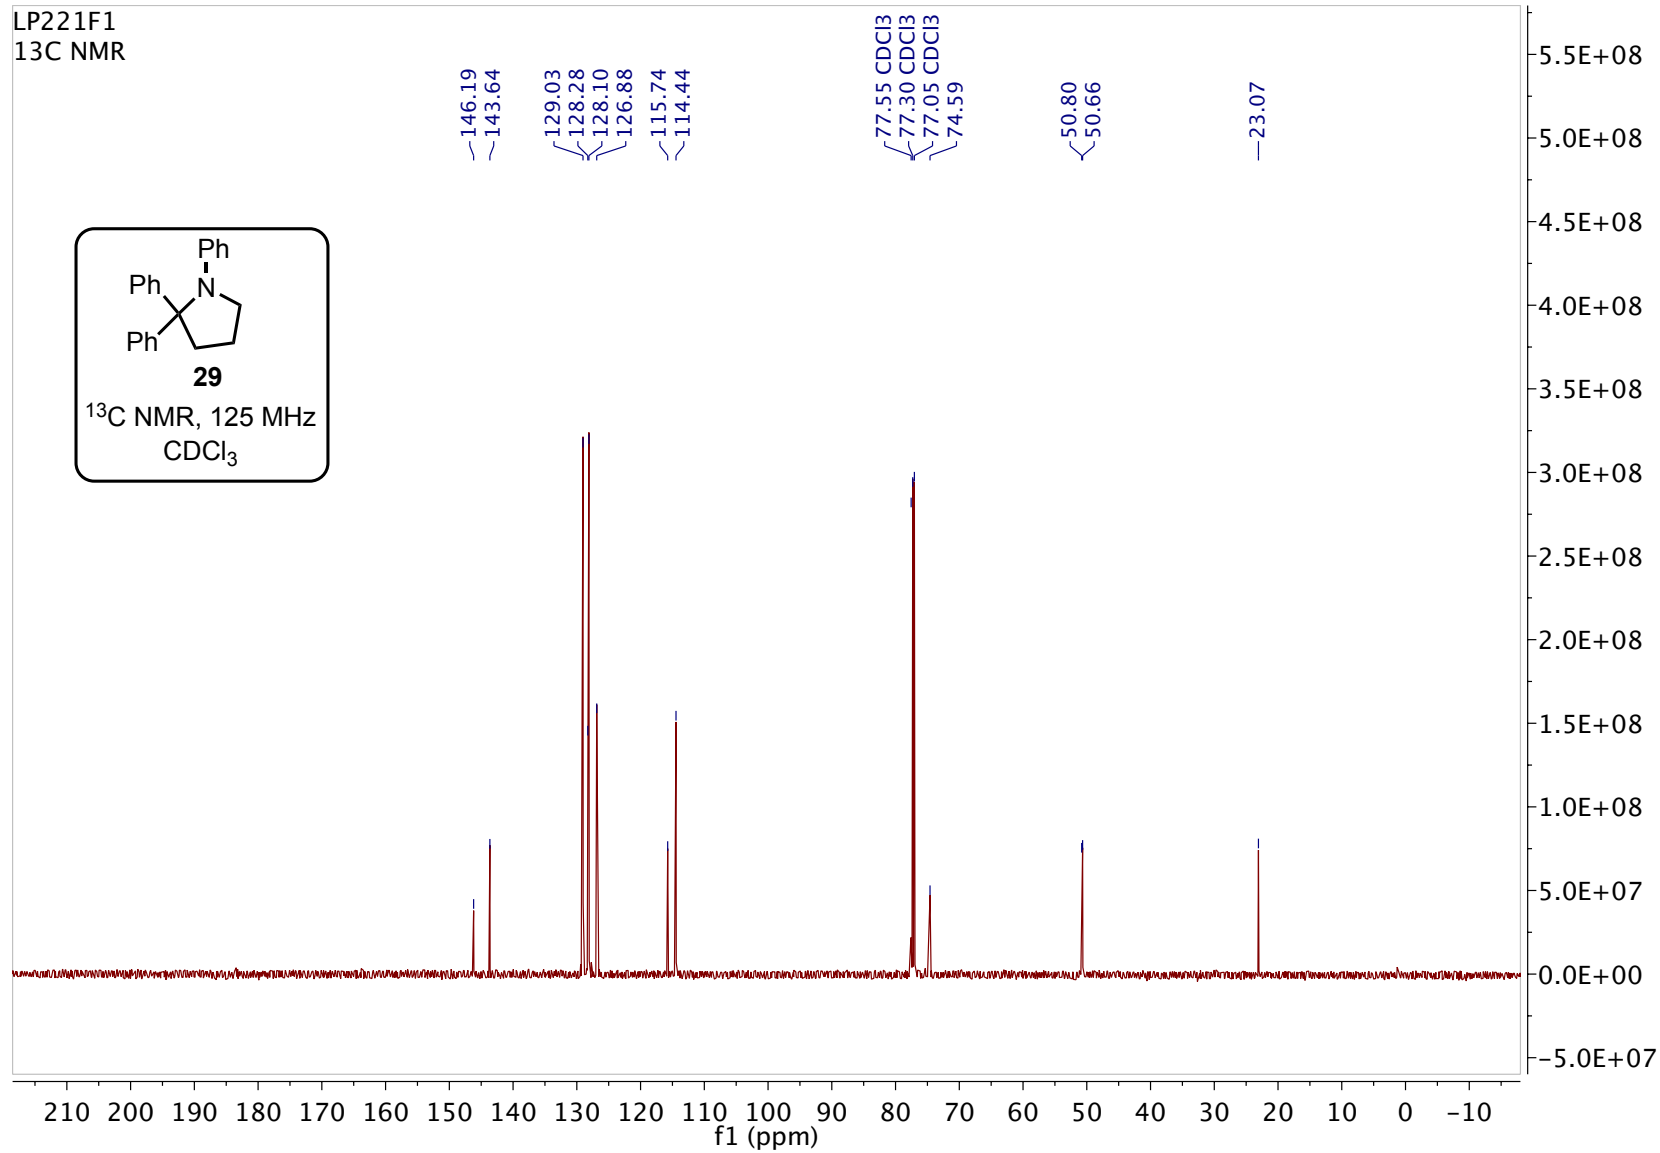

LP270P1  
1H NMR

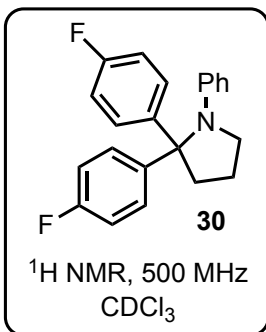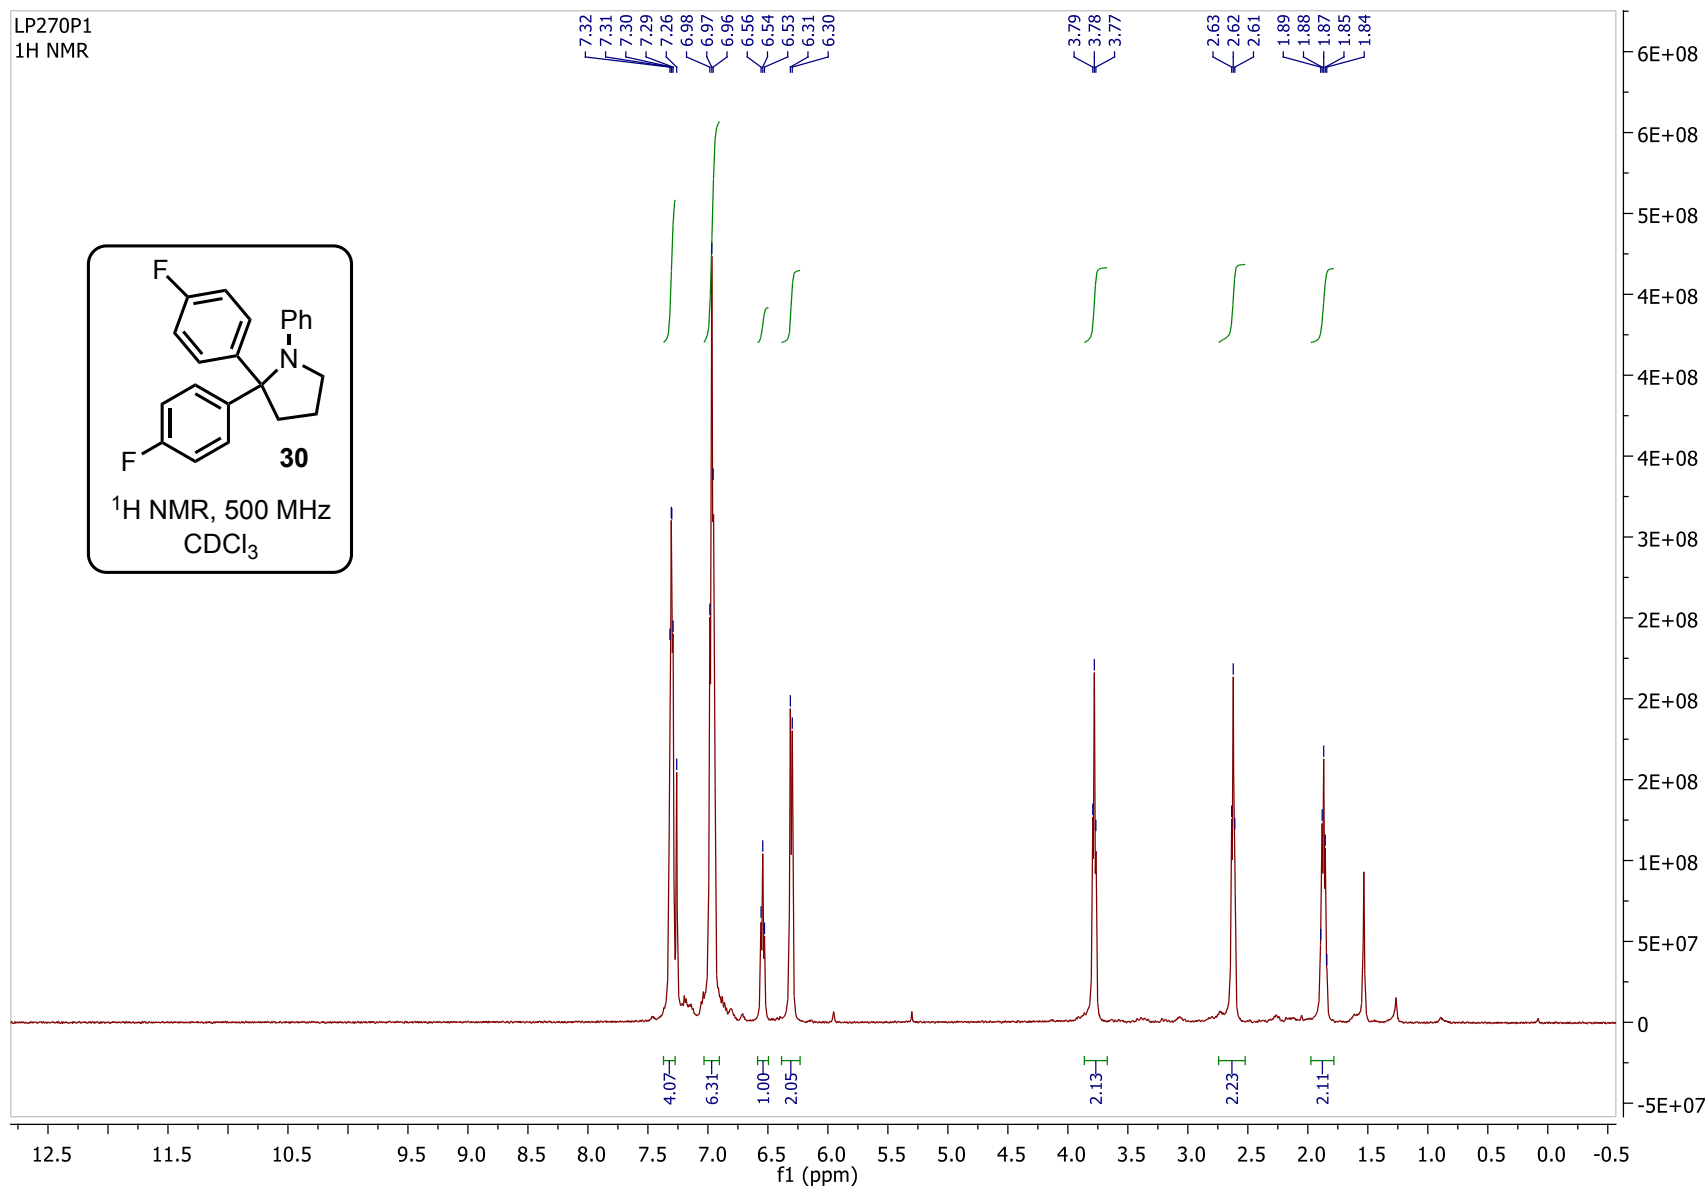



LP270P1  
13C NMR

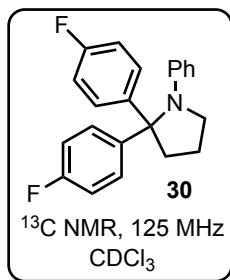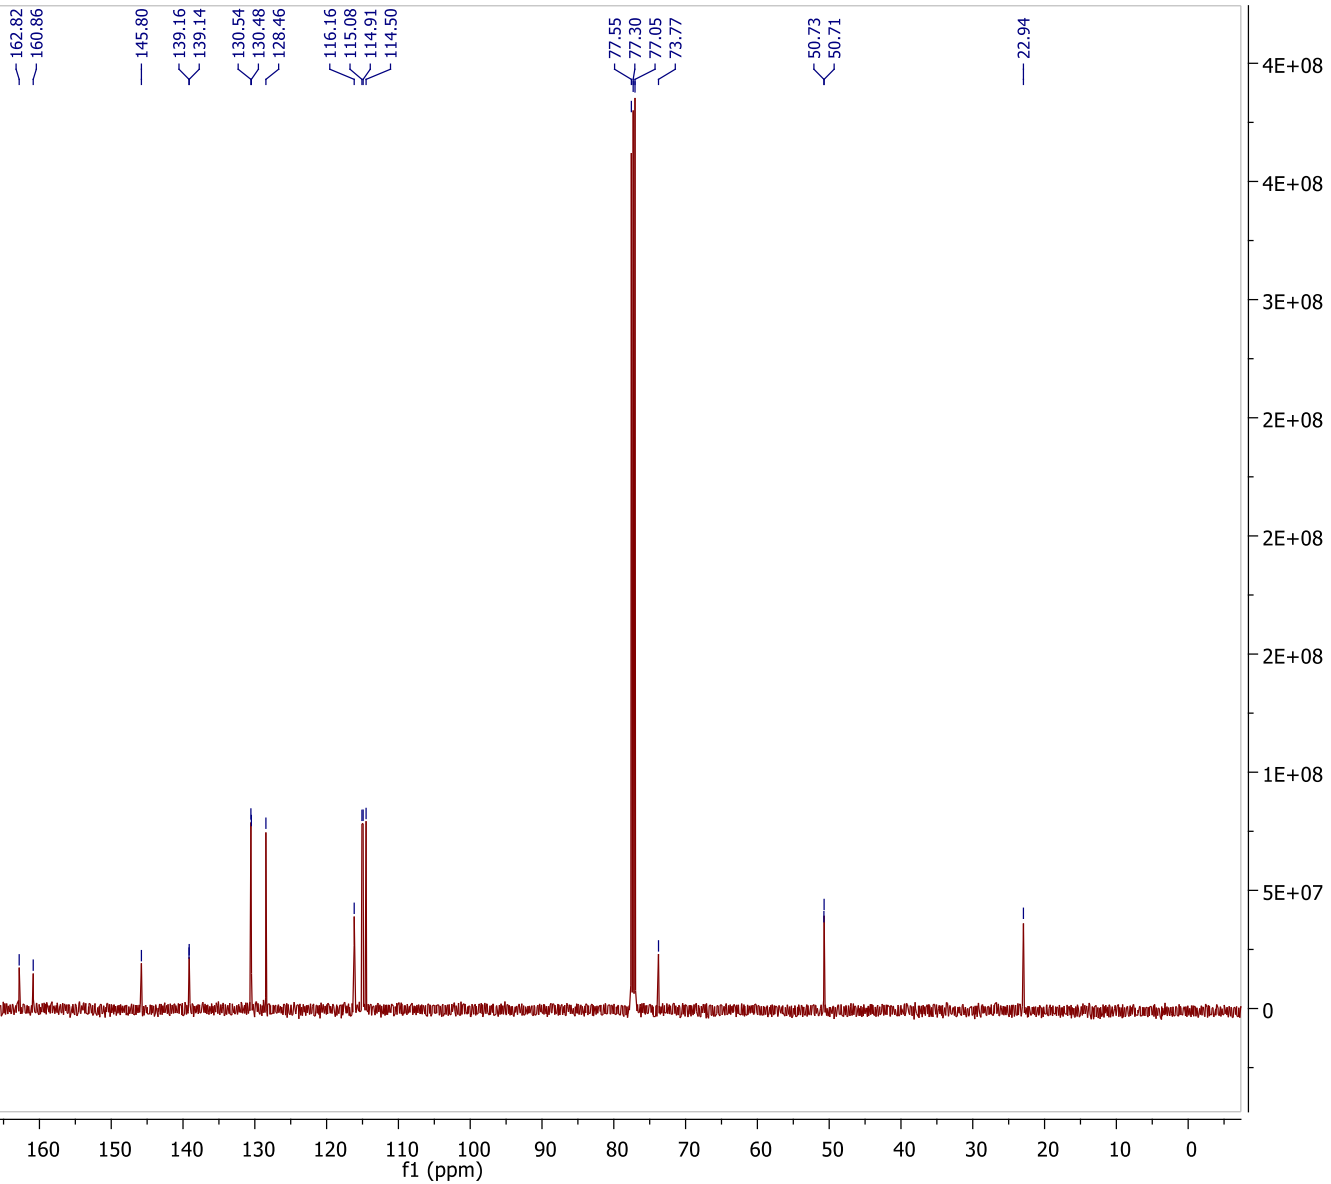

F19 NMR

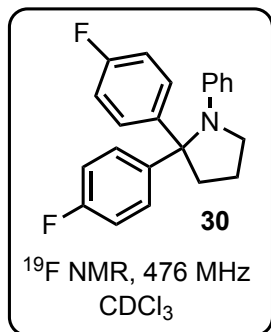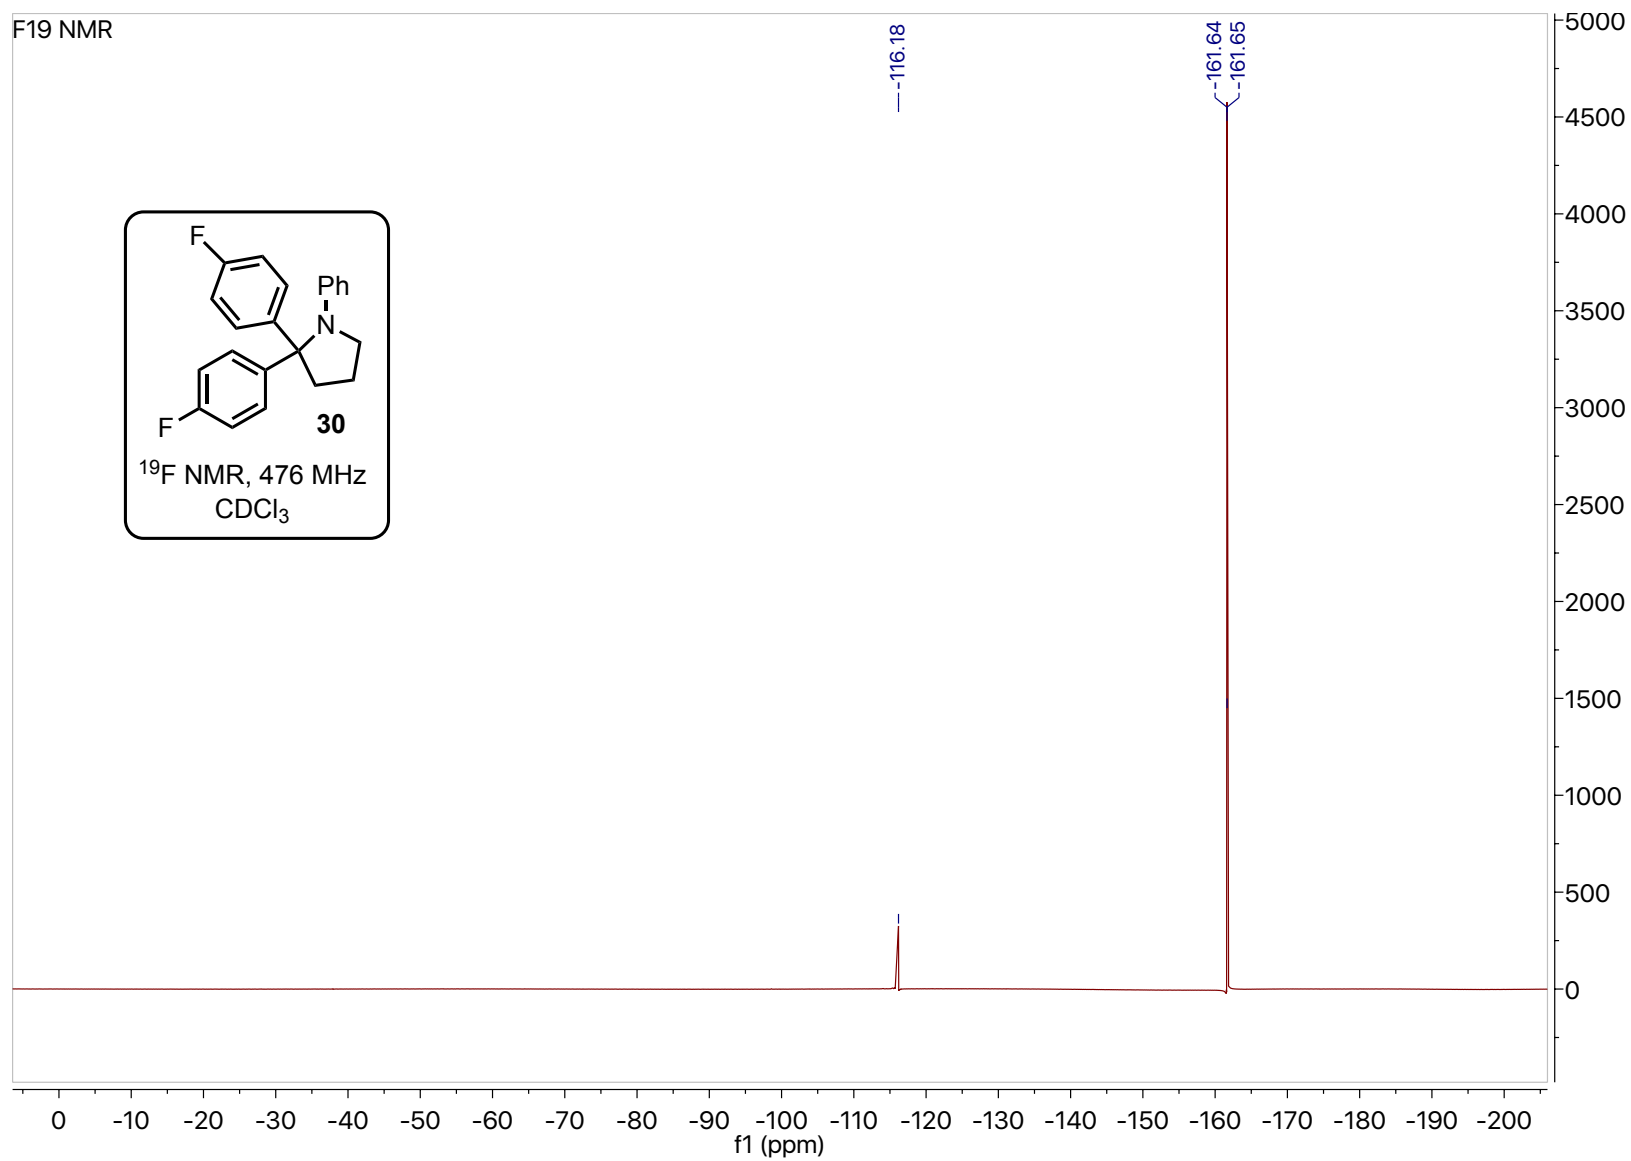

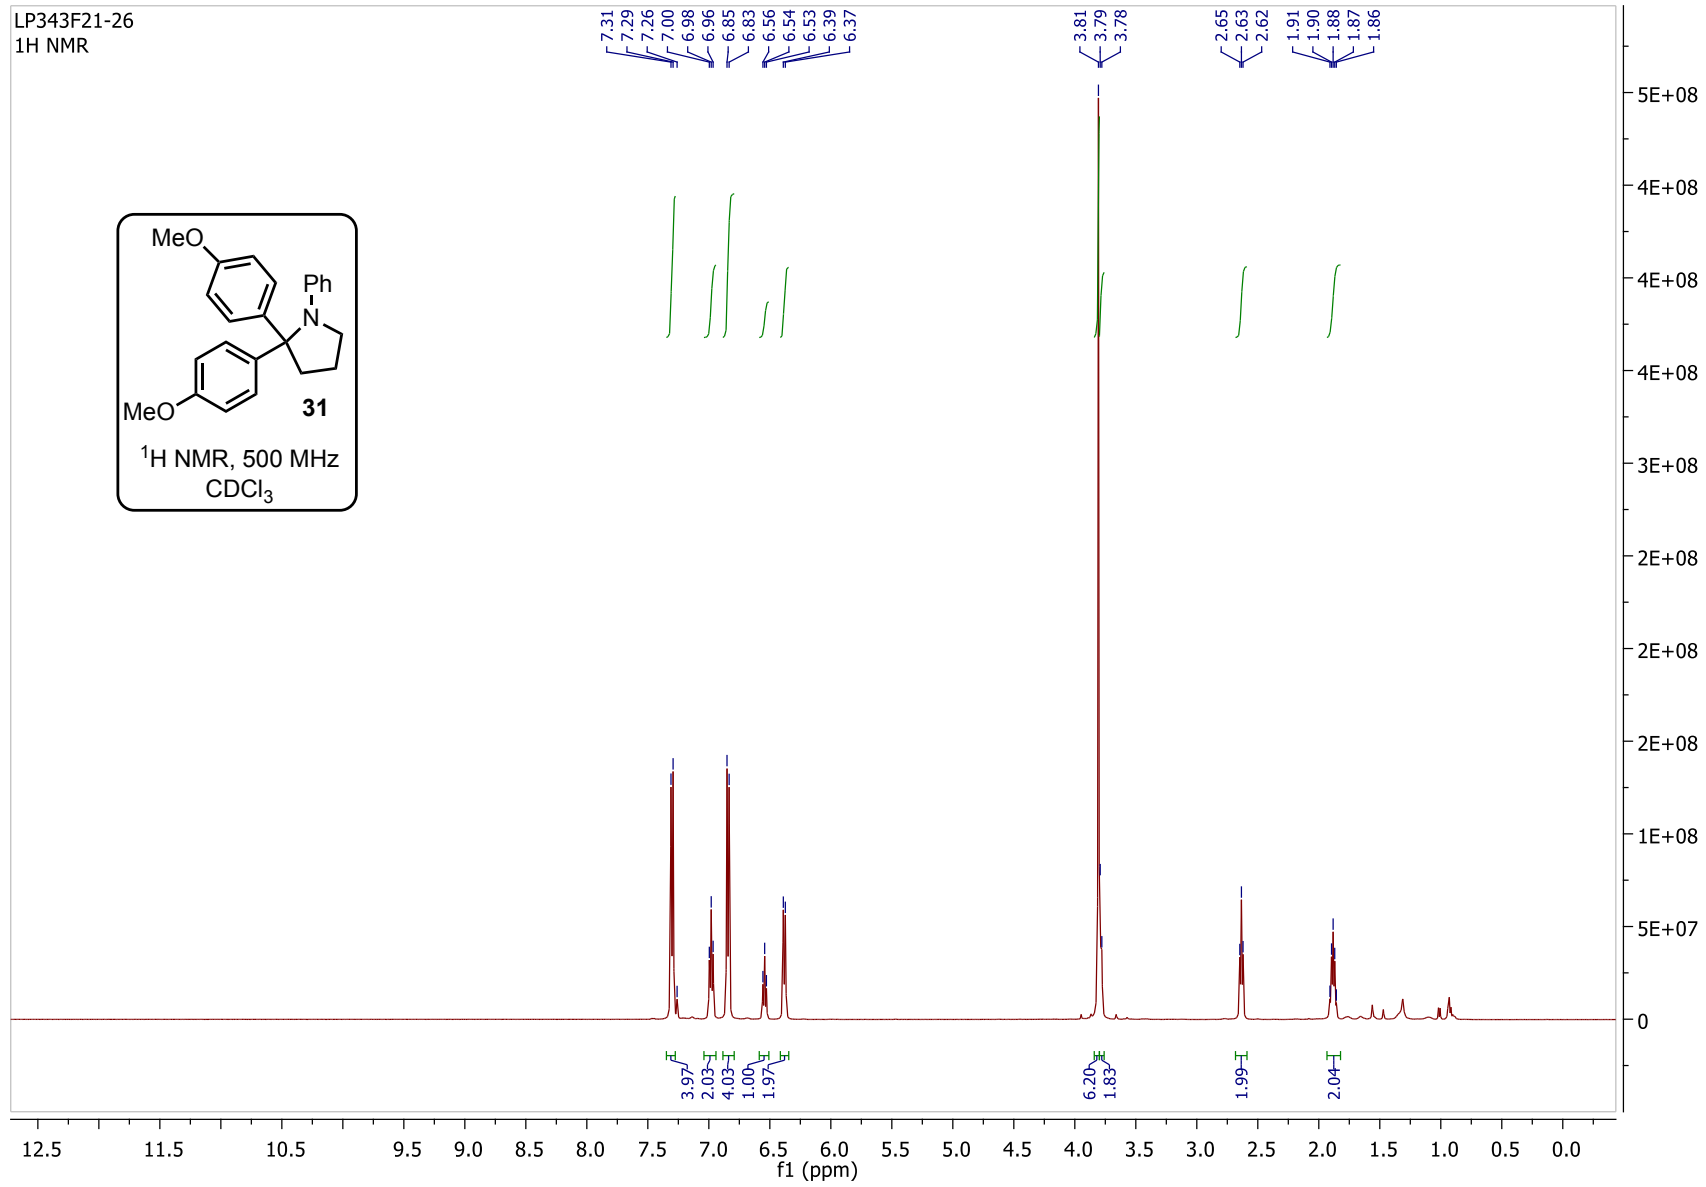

LP343F21-26  
13C NMR

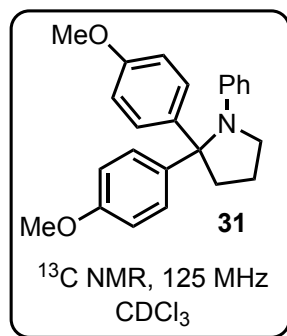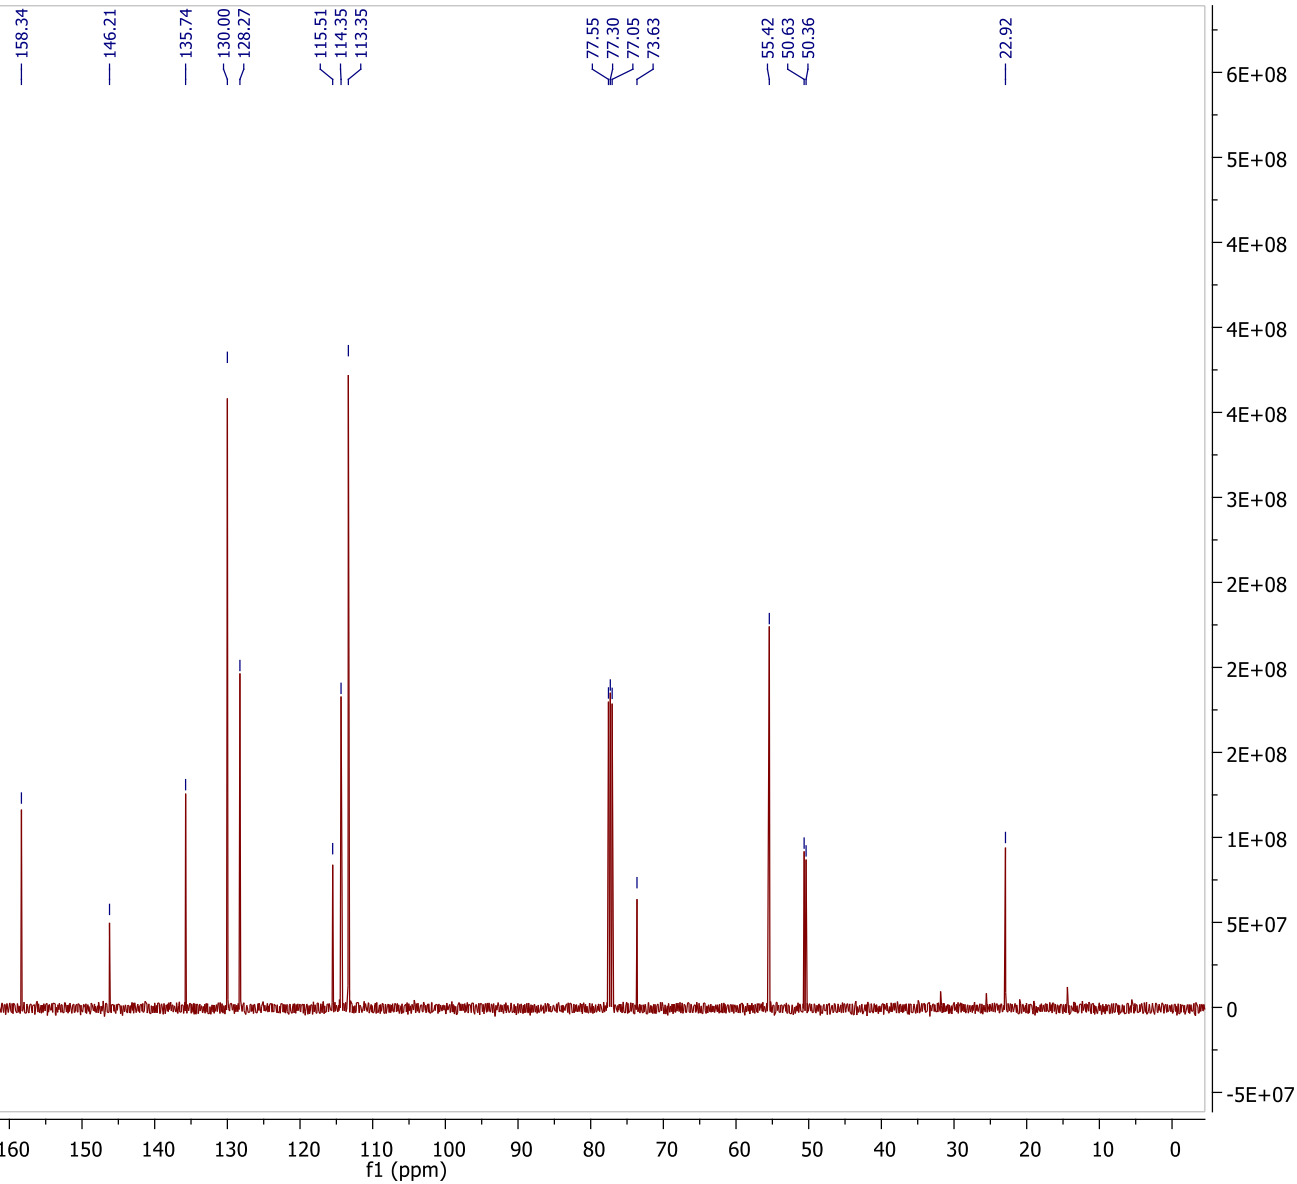

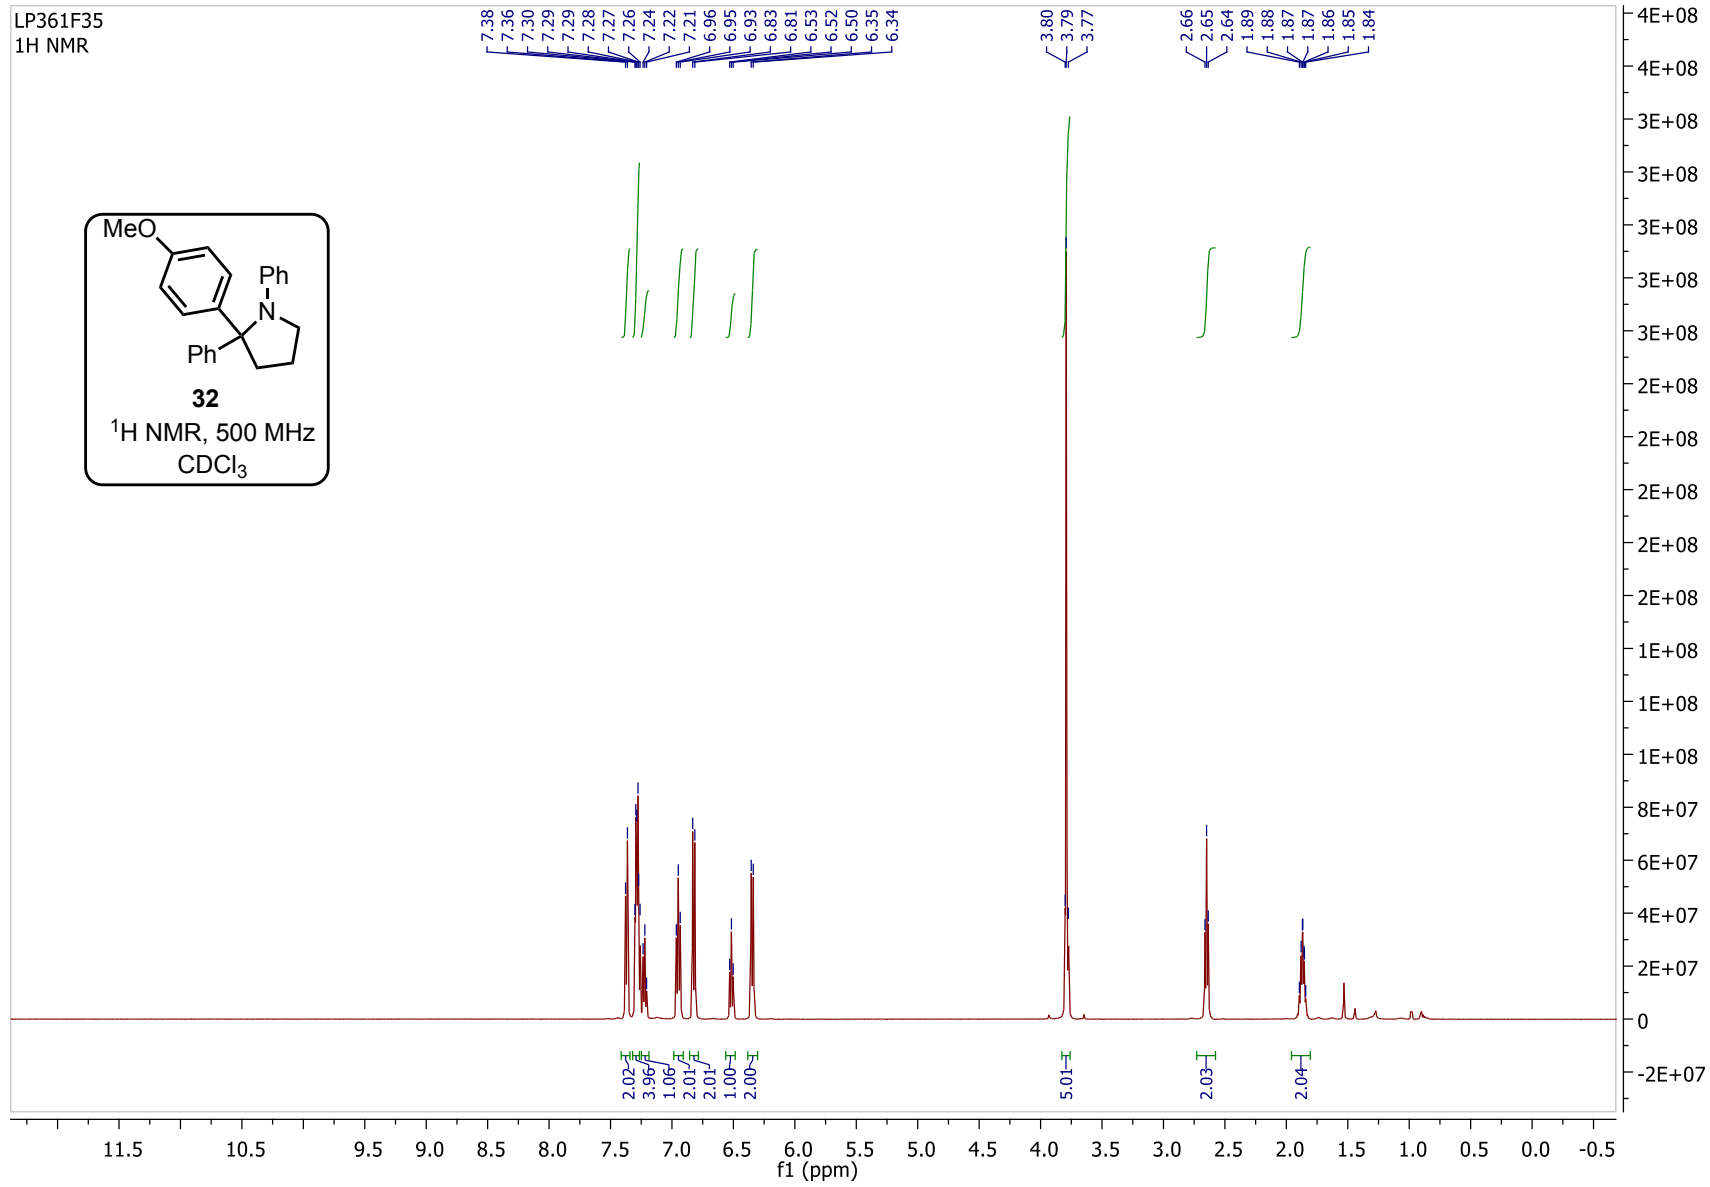

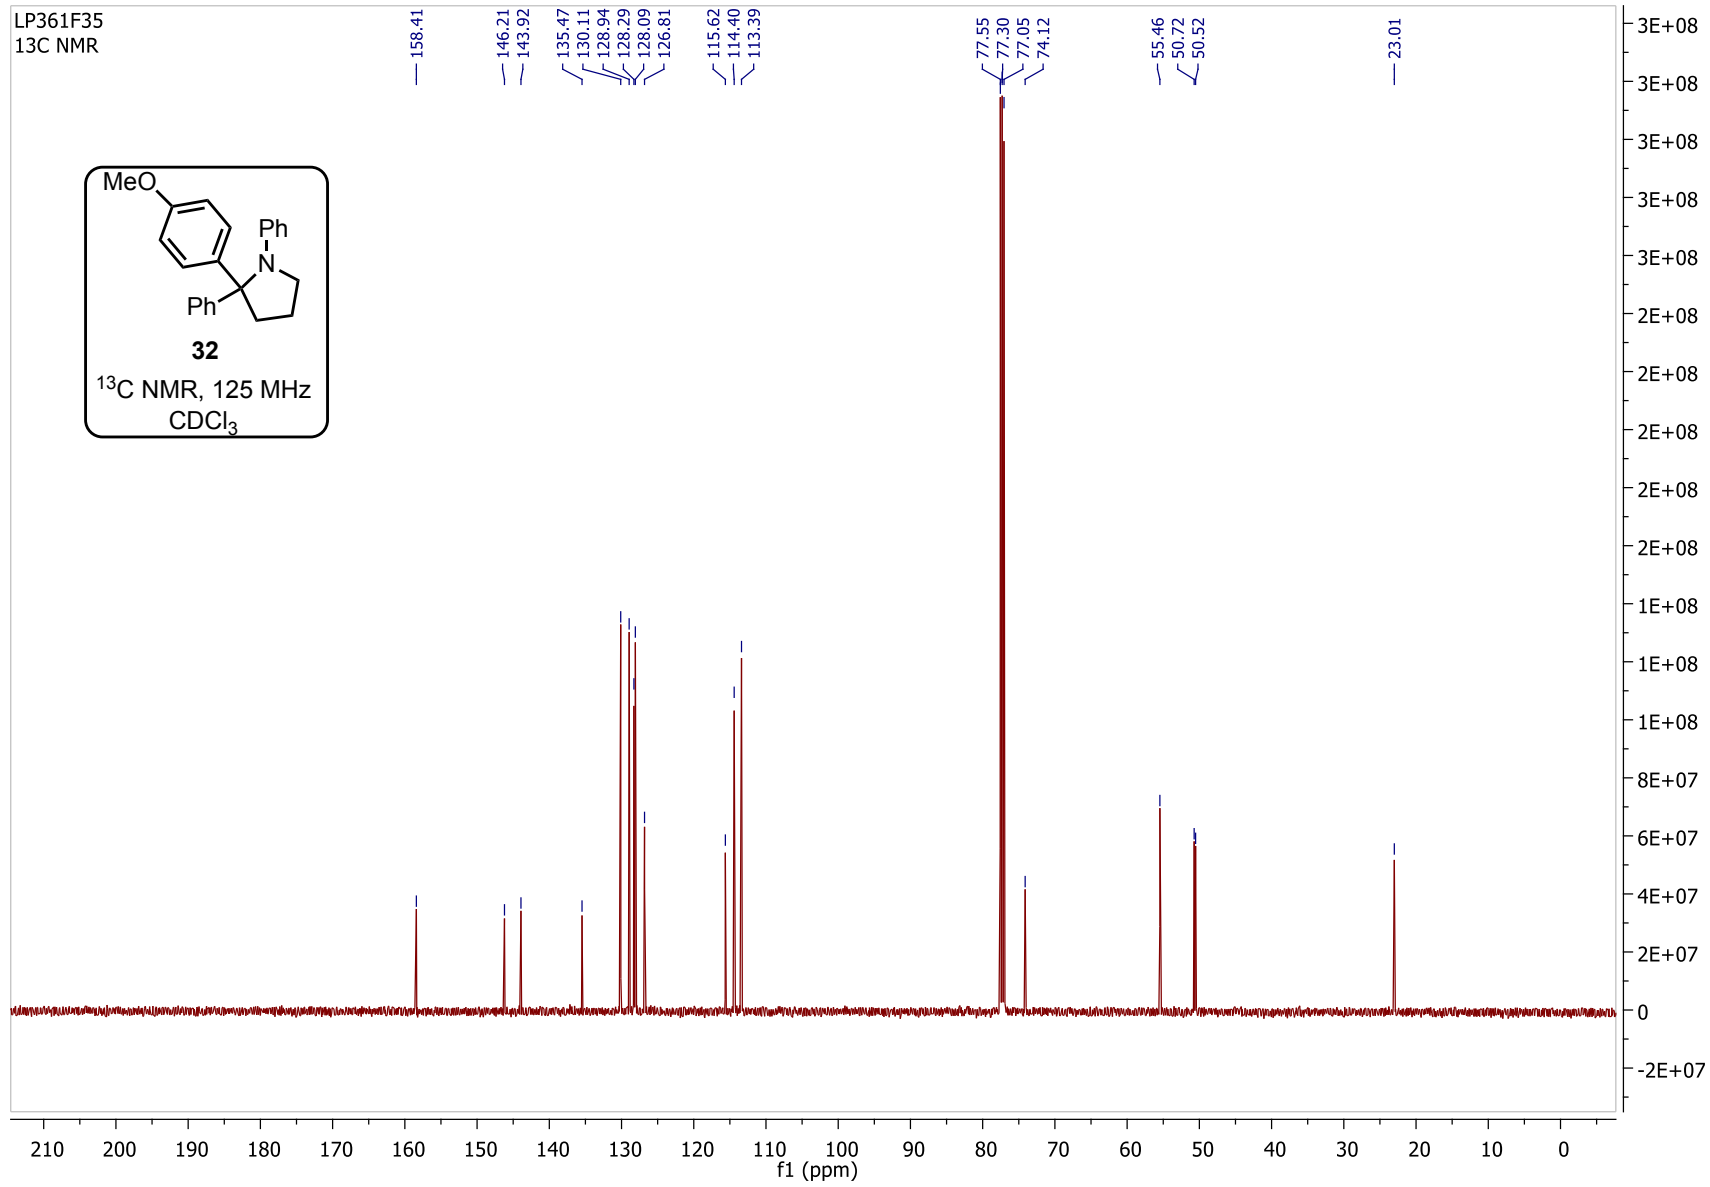

LP370P2  
1H NMR

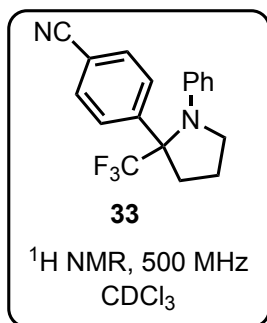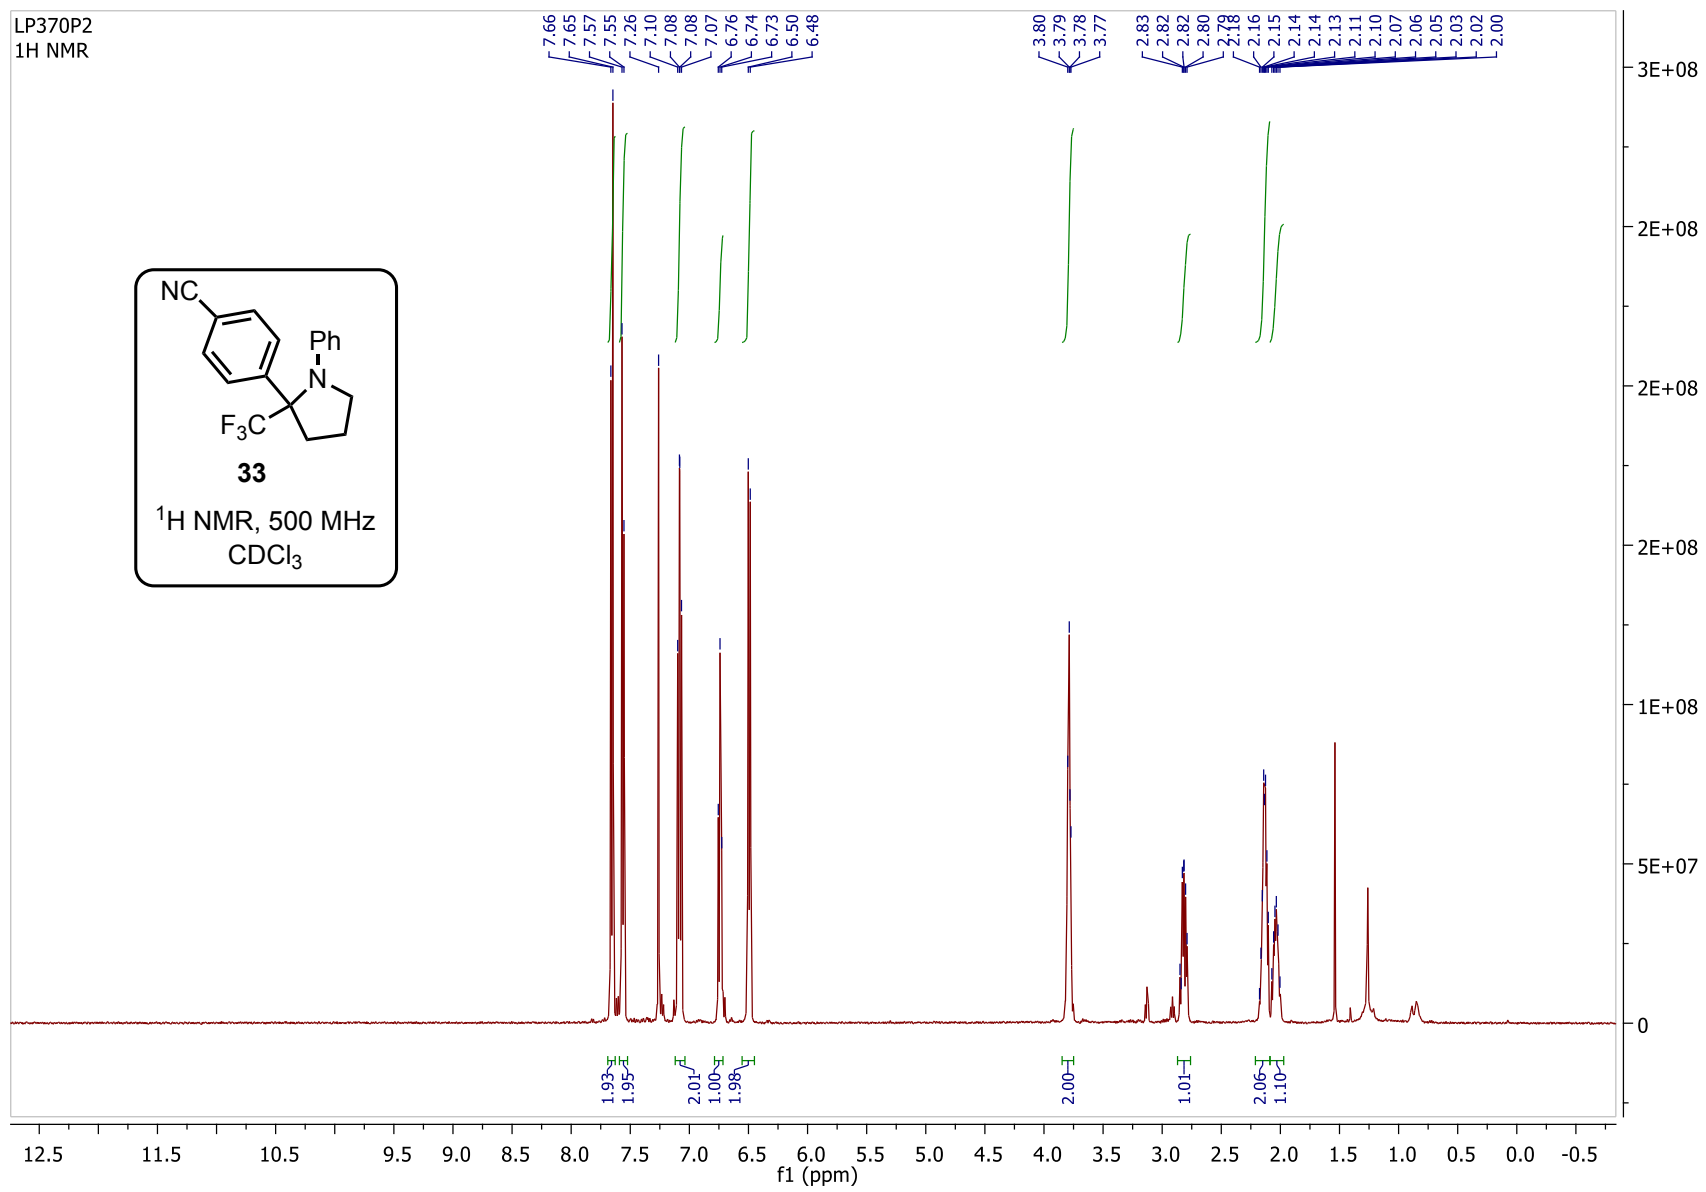

LP370P2  
13C NMR

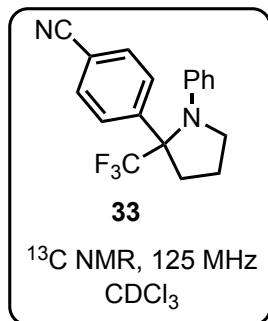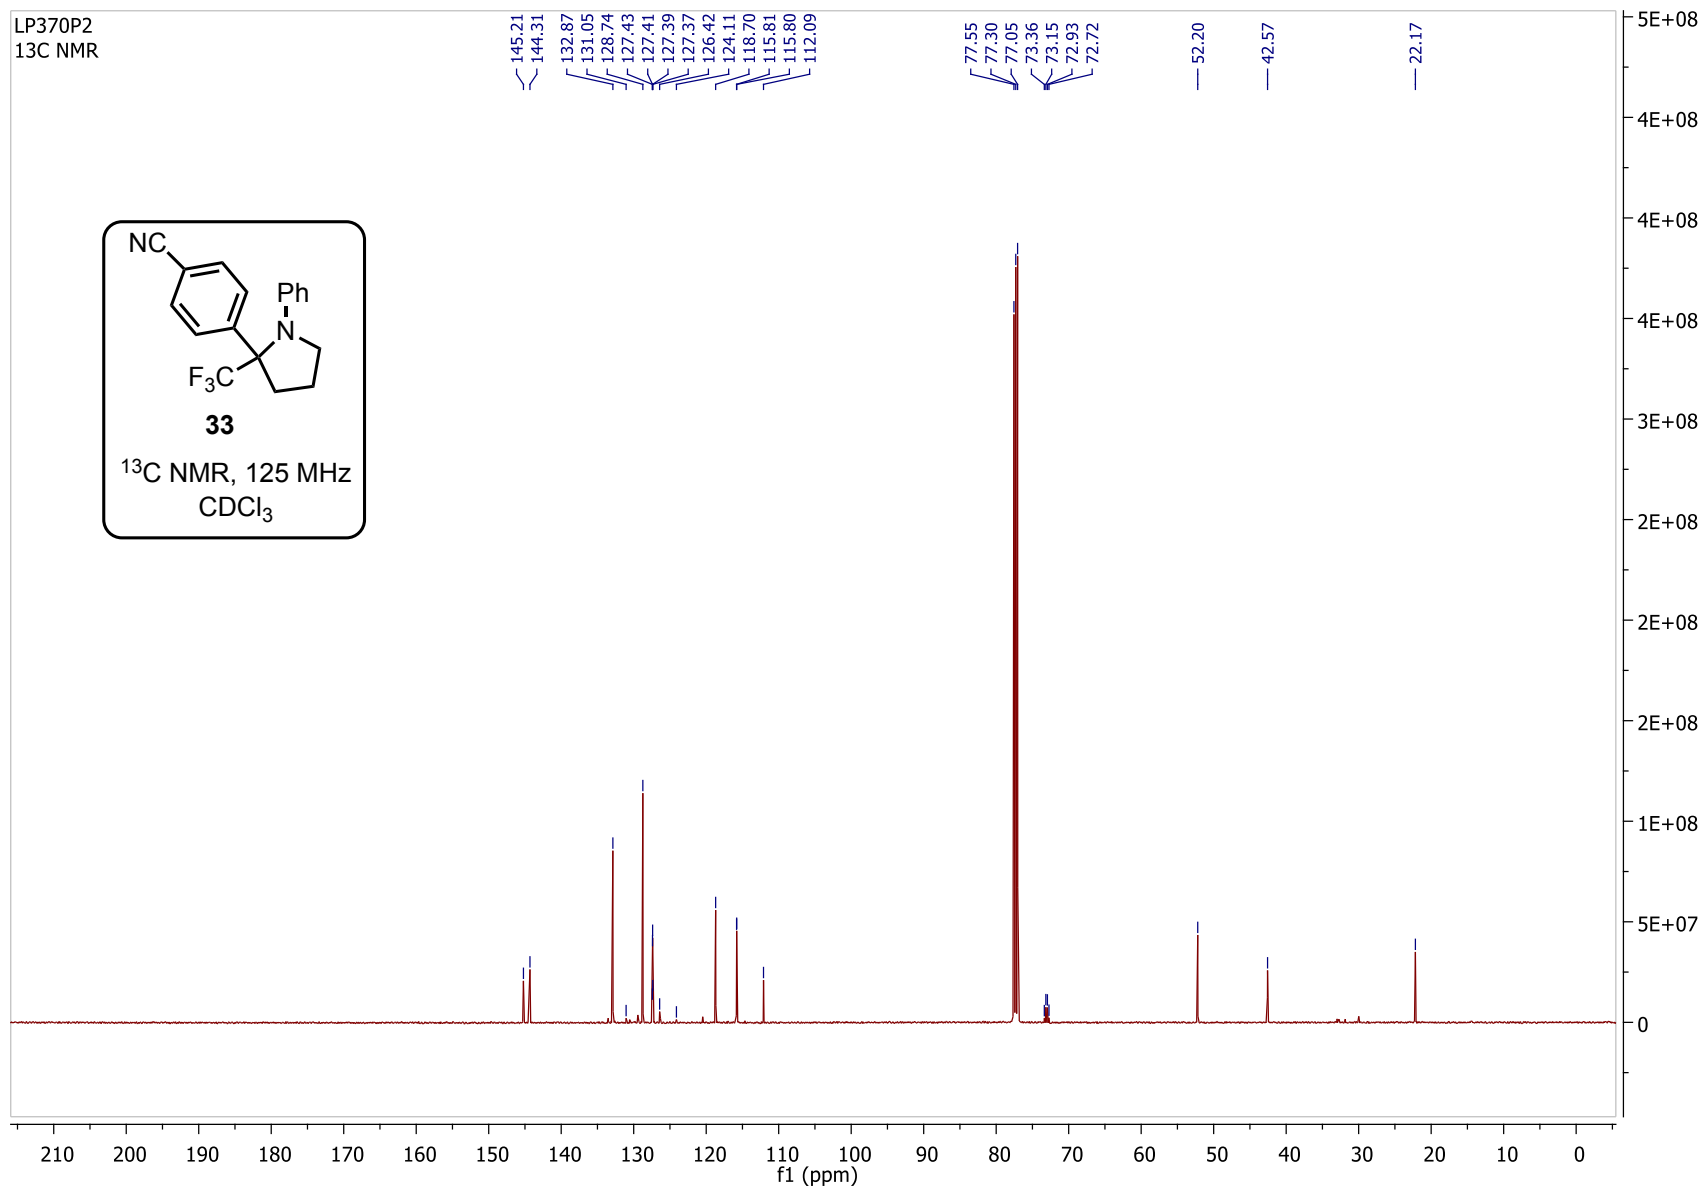



F19 NMR

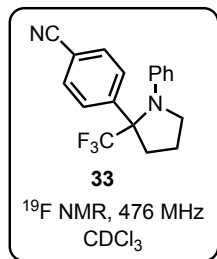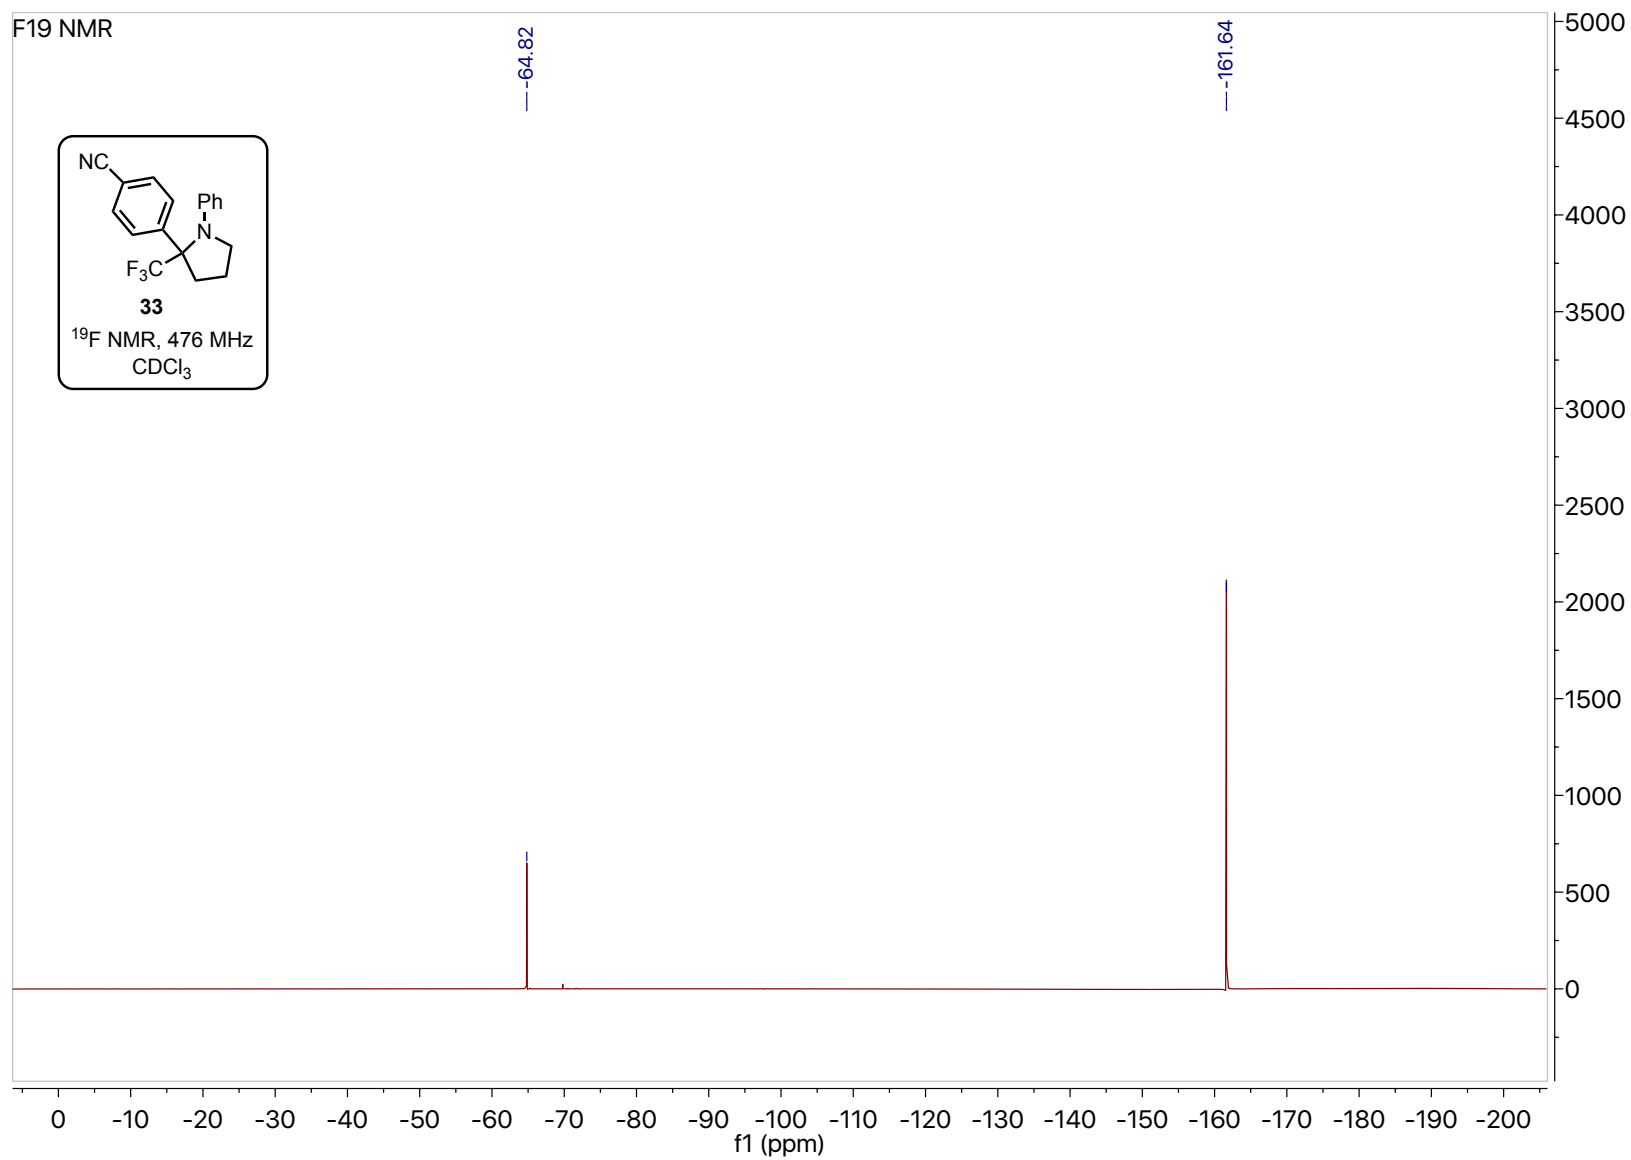

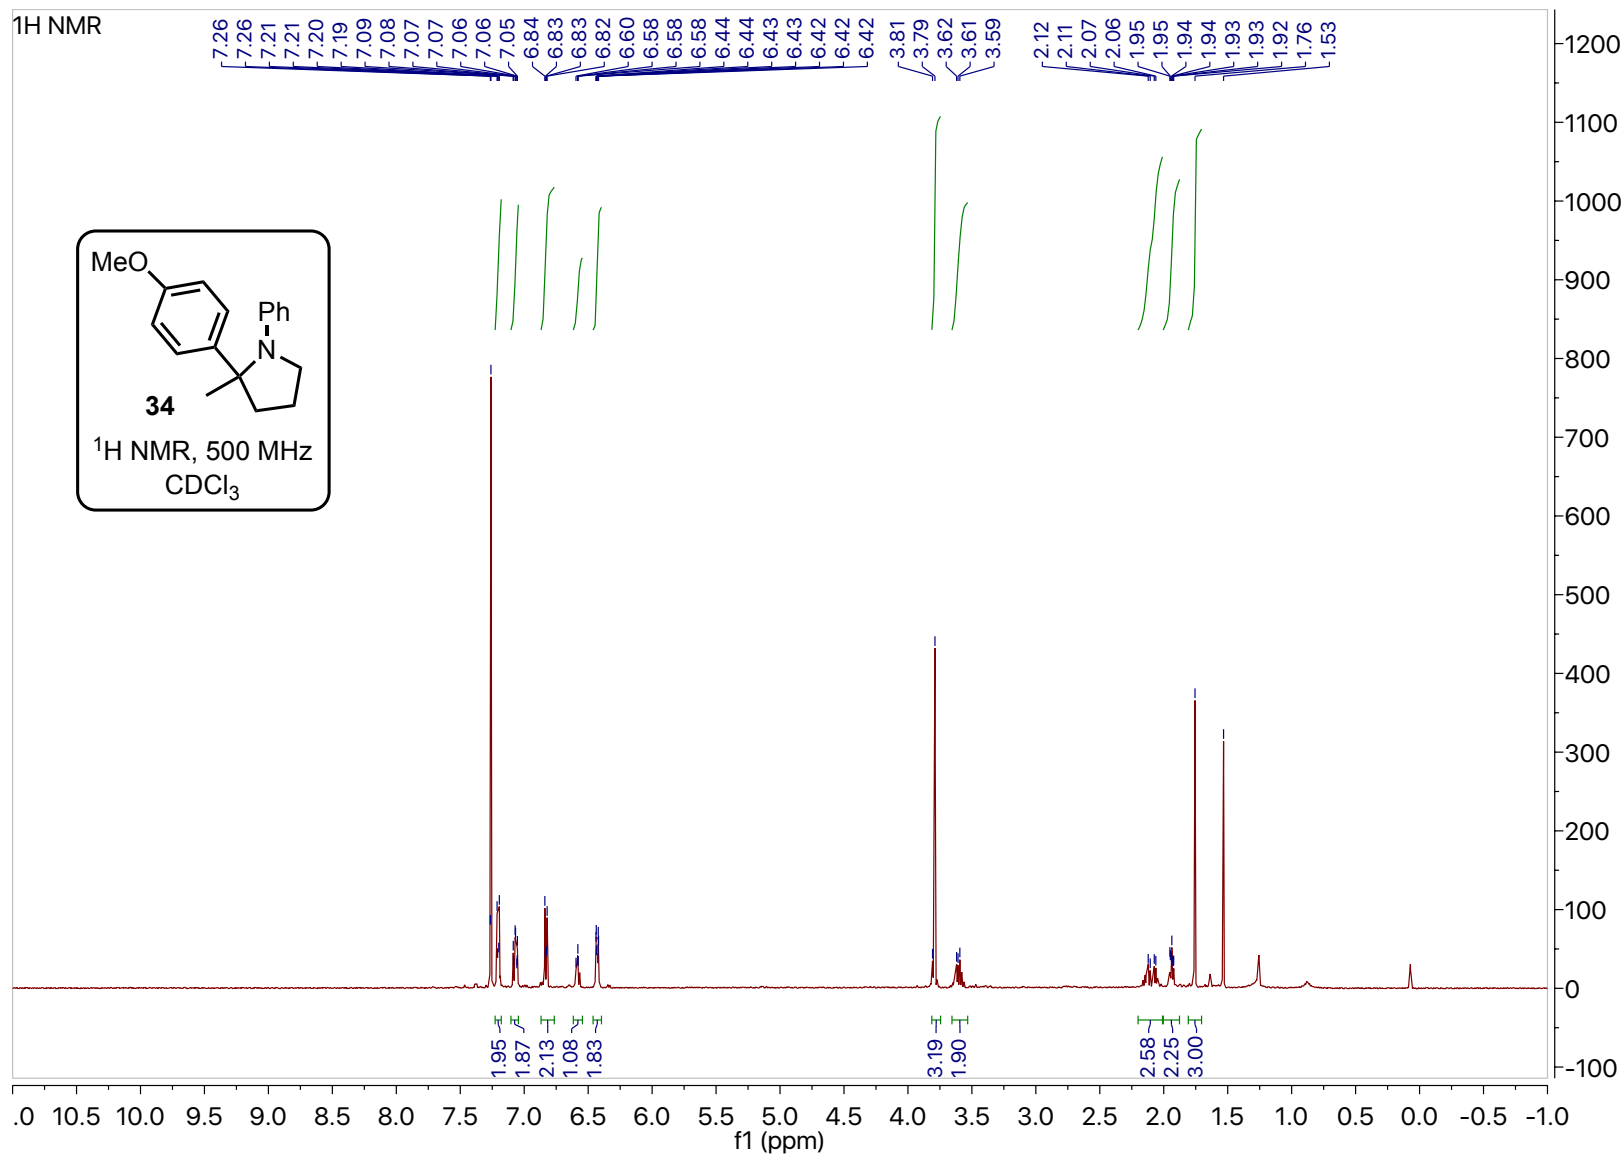

LP354F15-18  
13C NMR

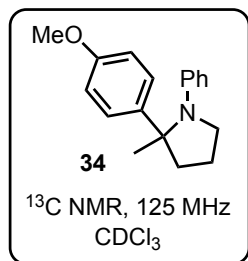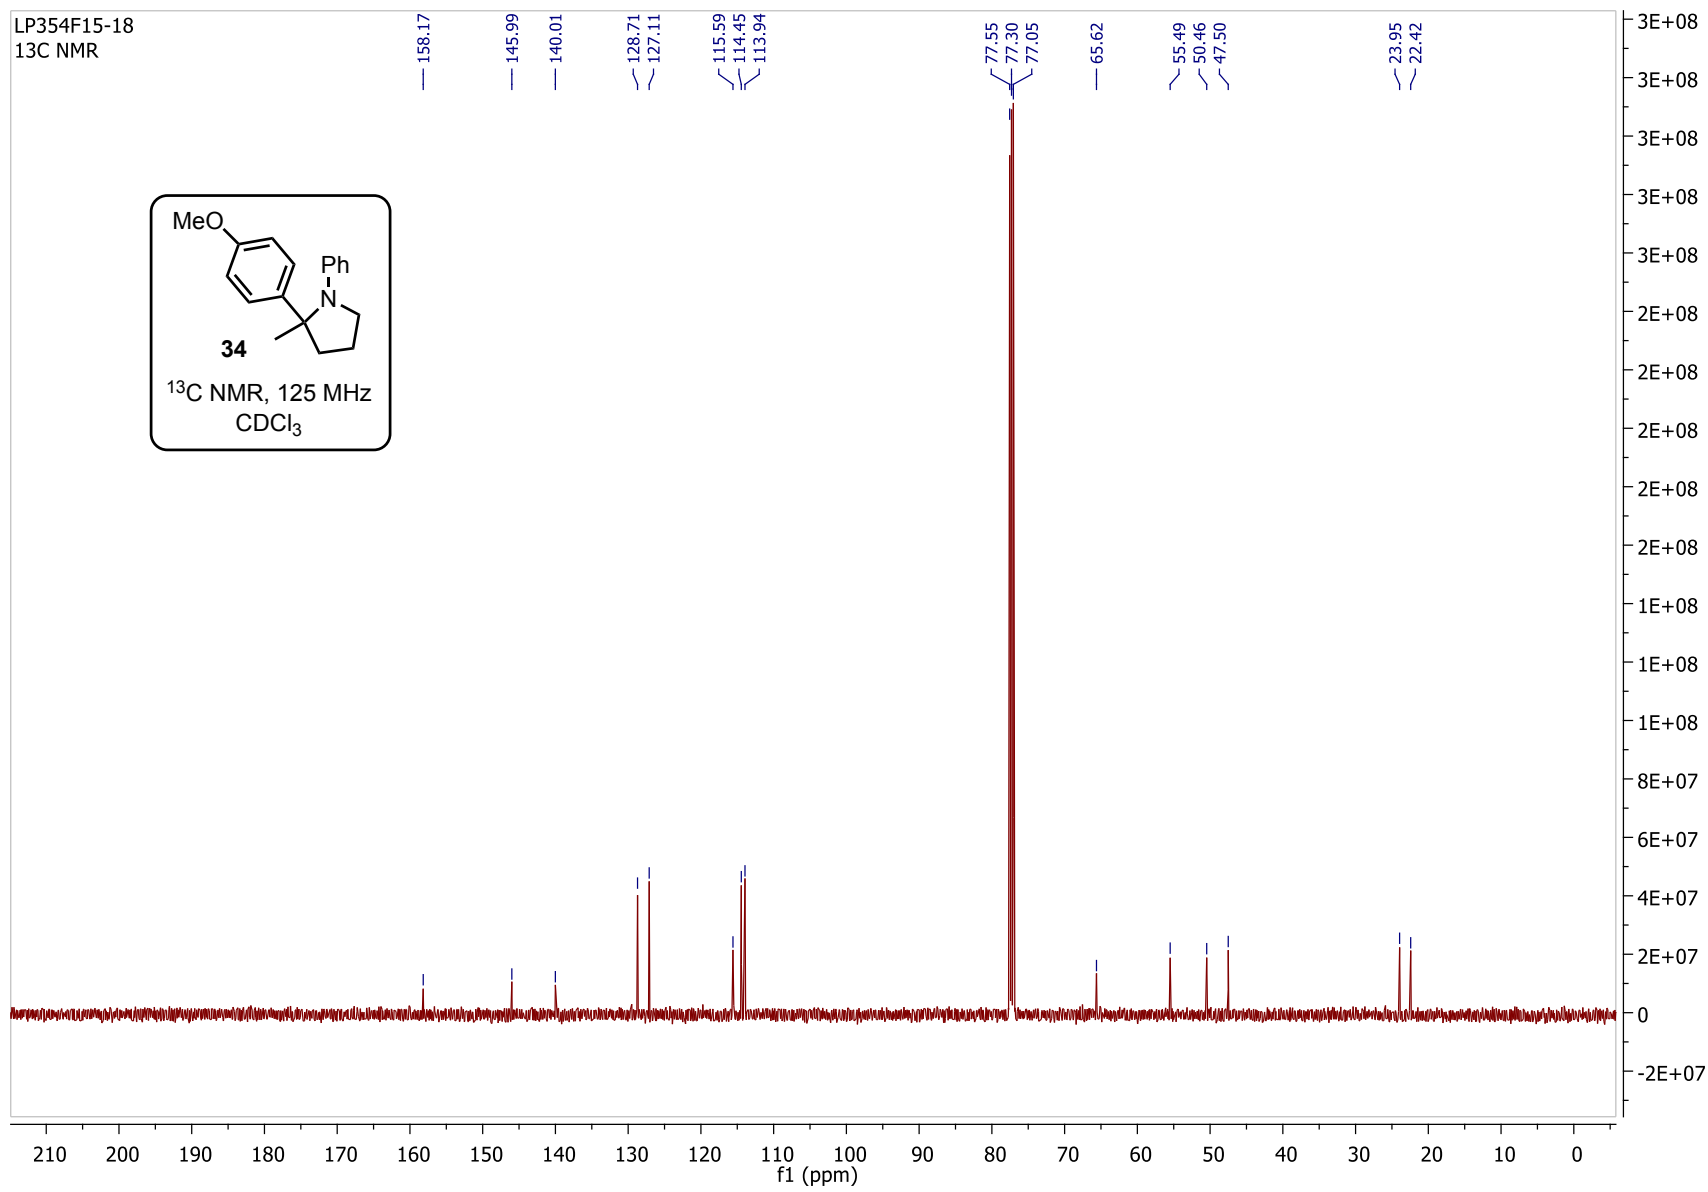

LP323P  
1H NMR

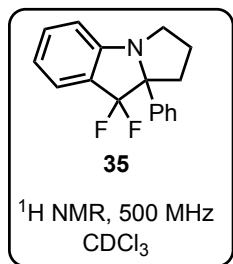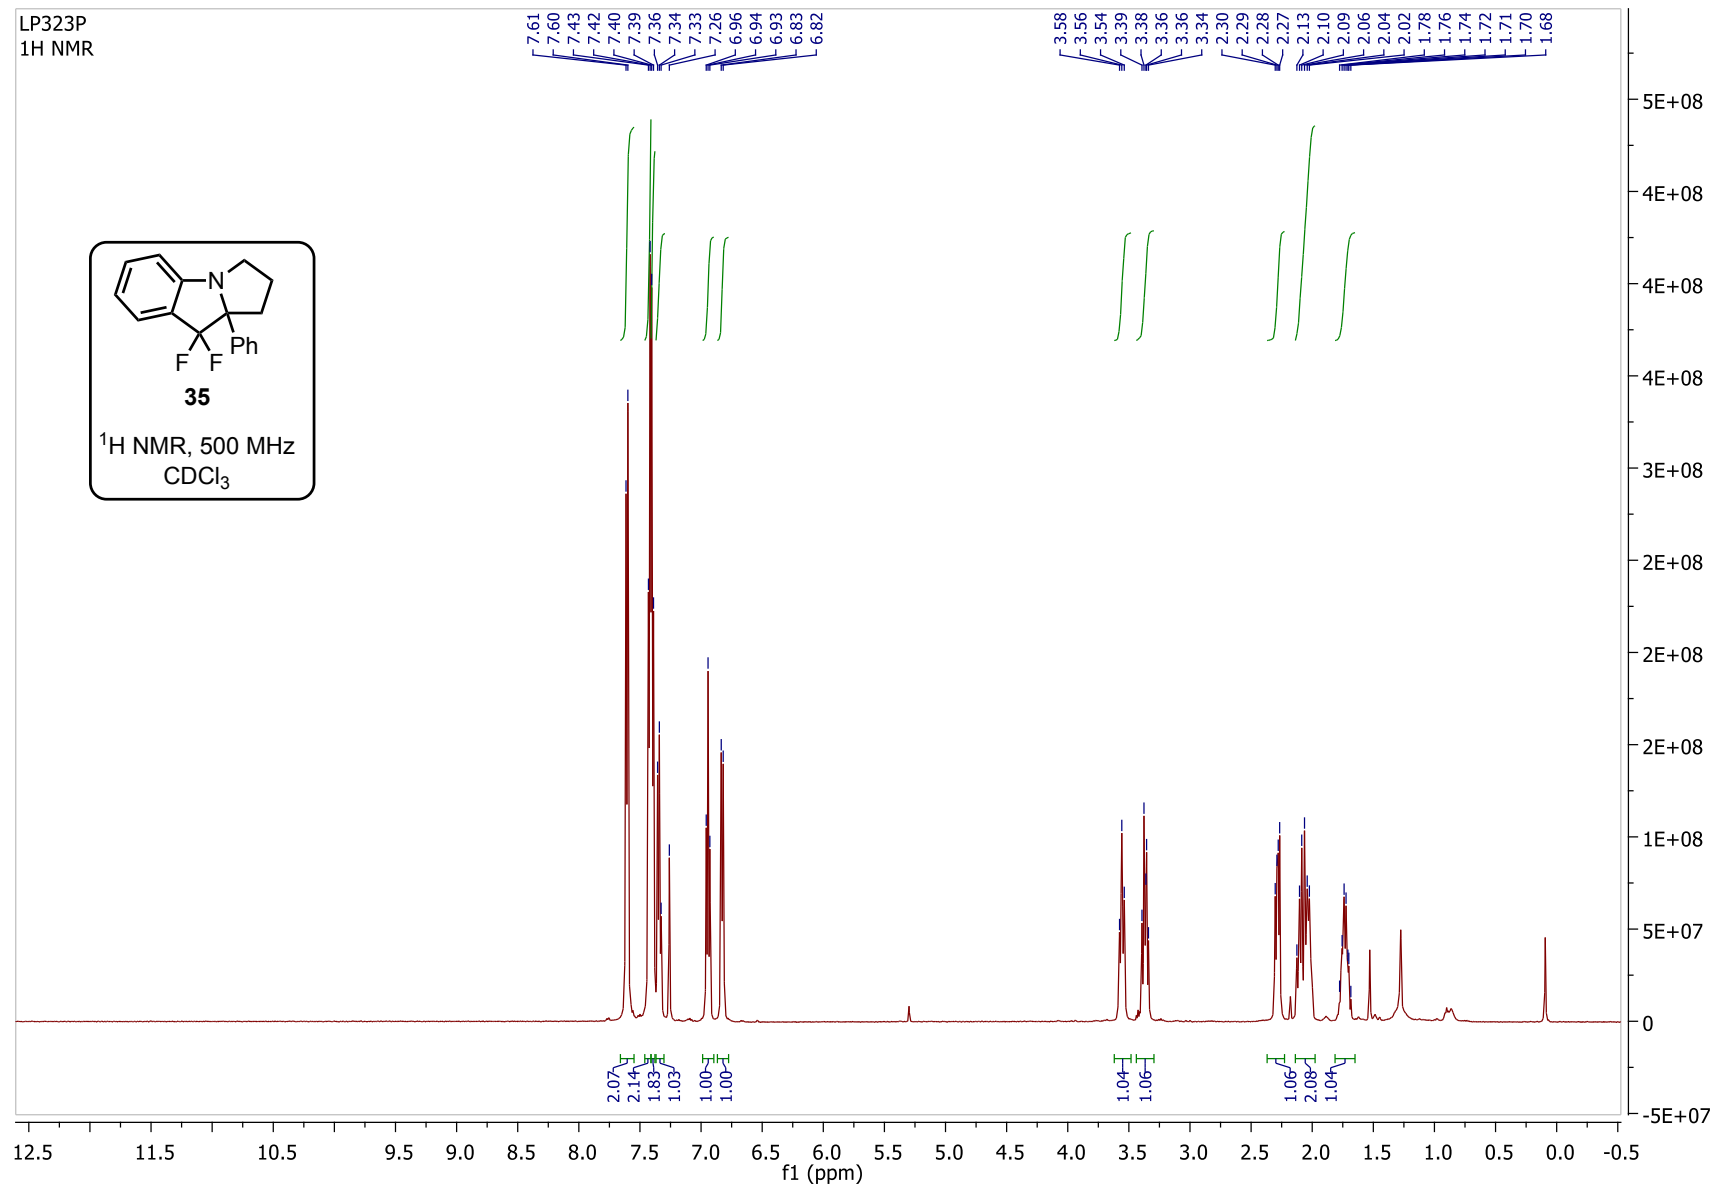

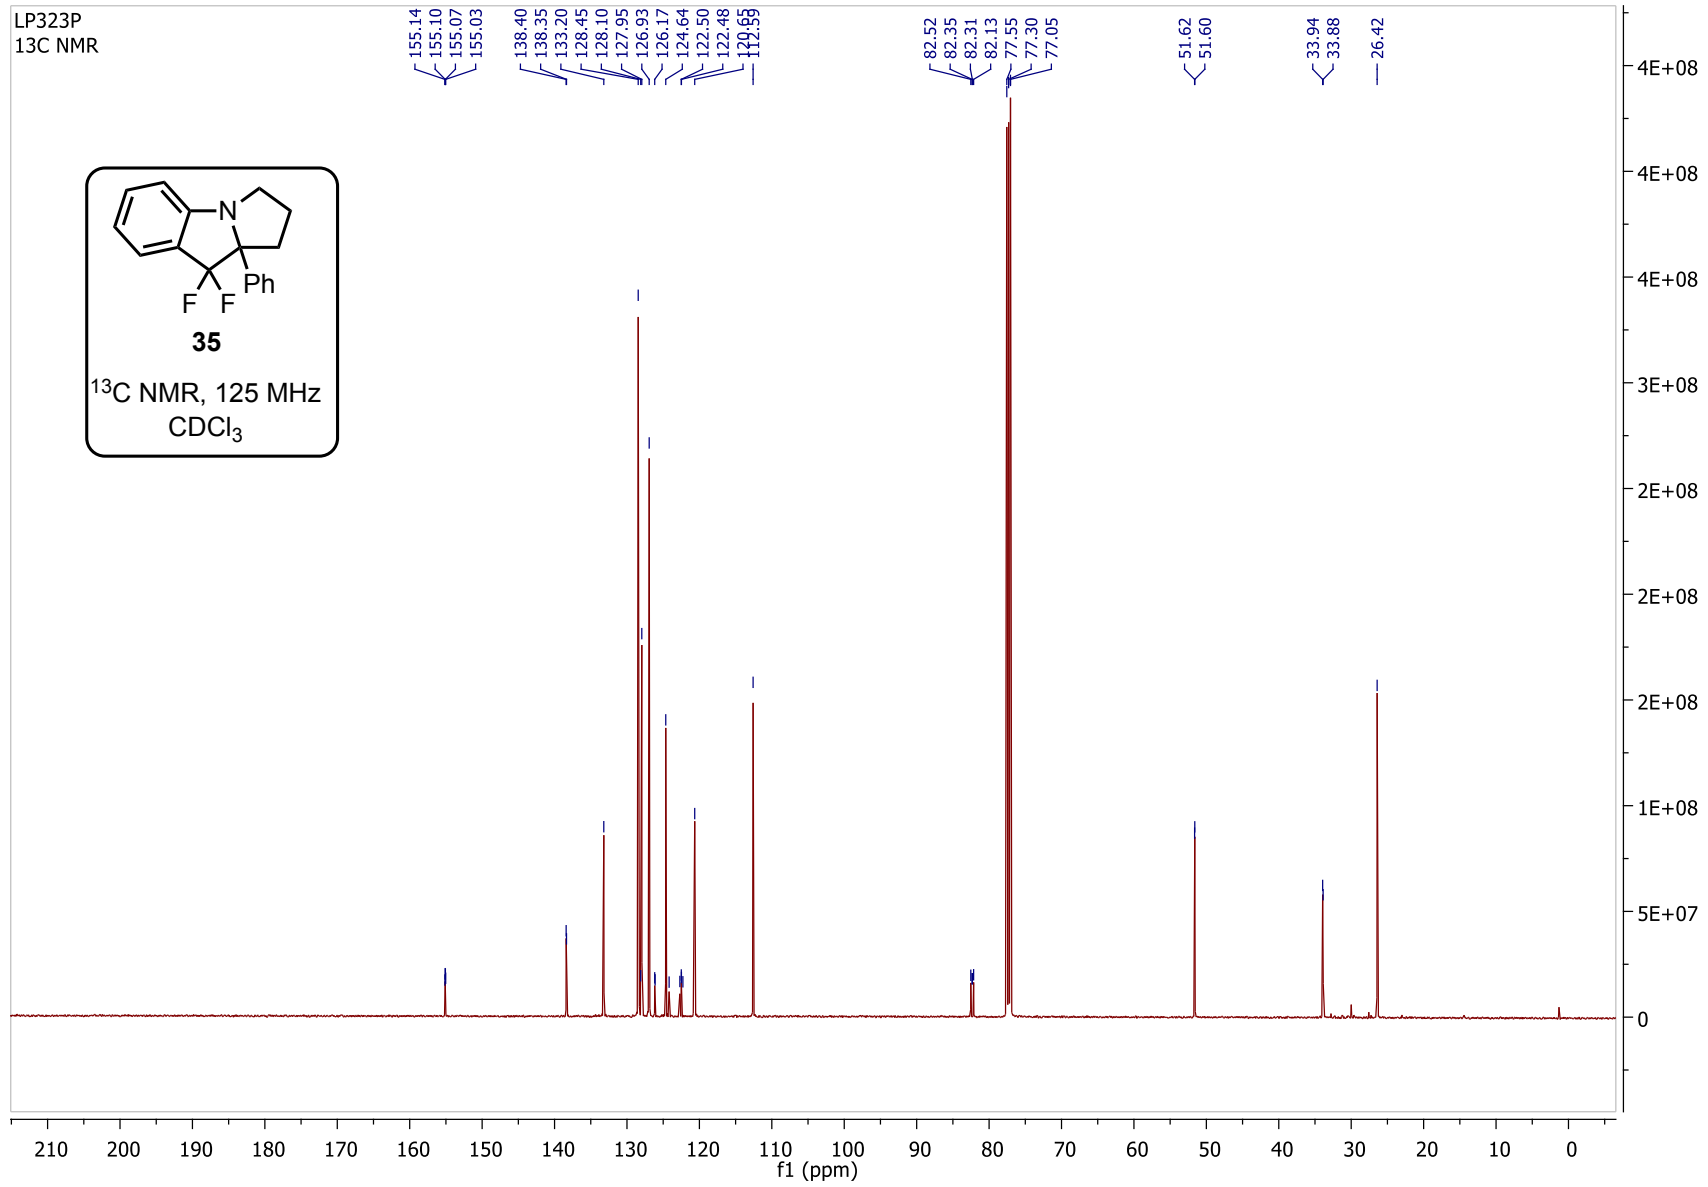

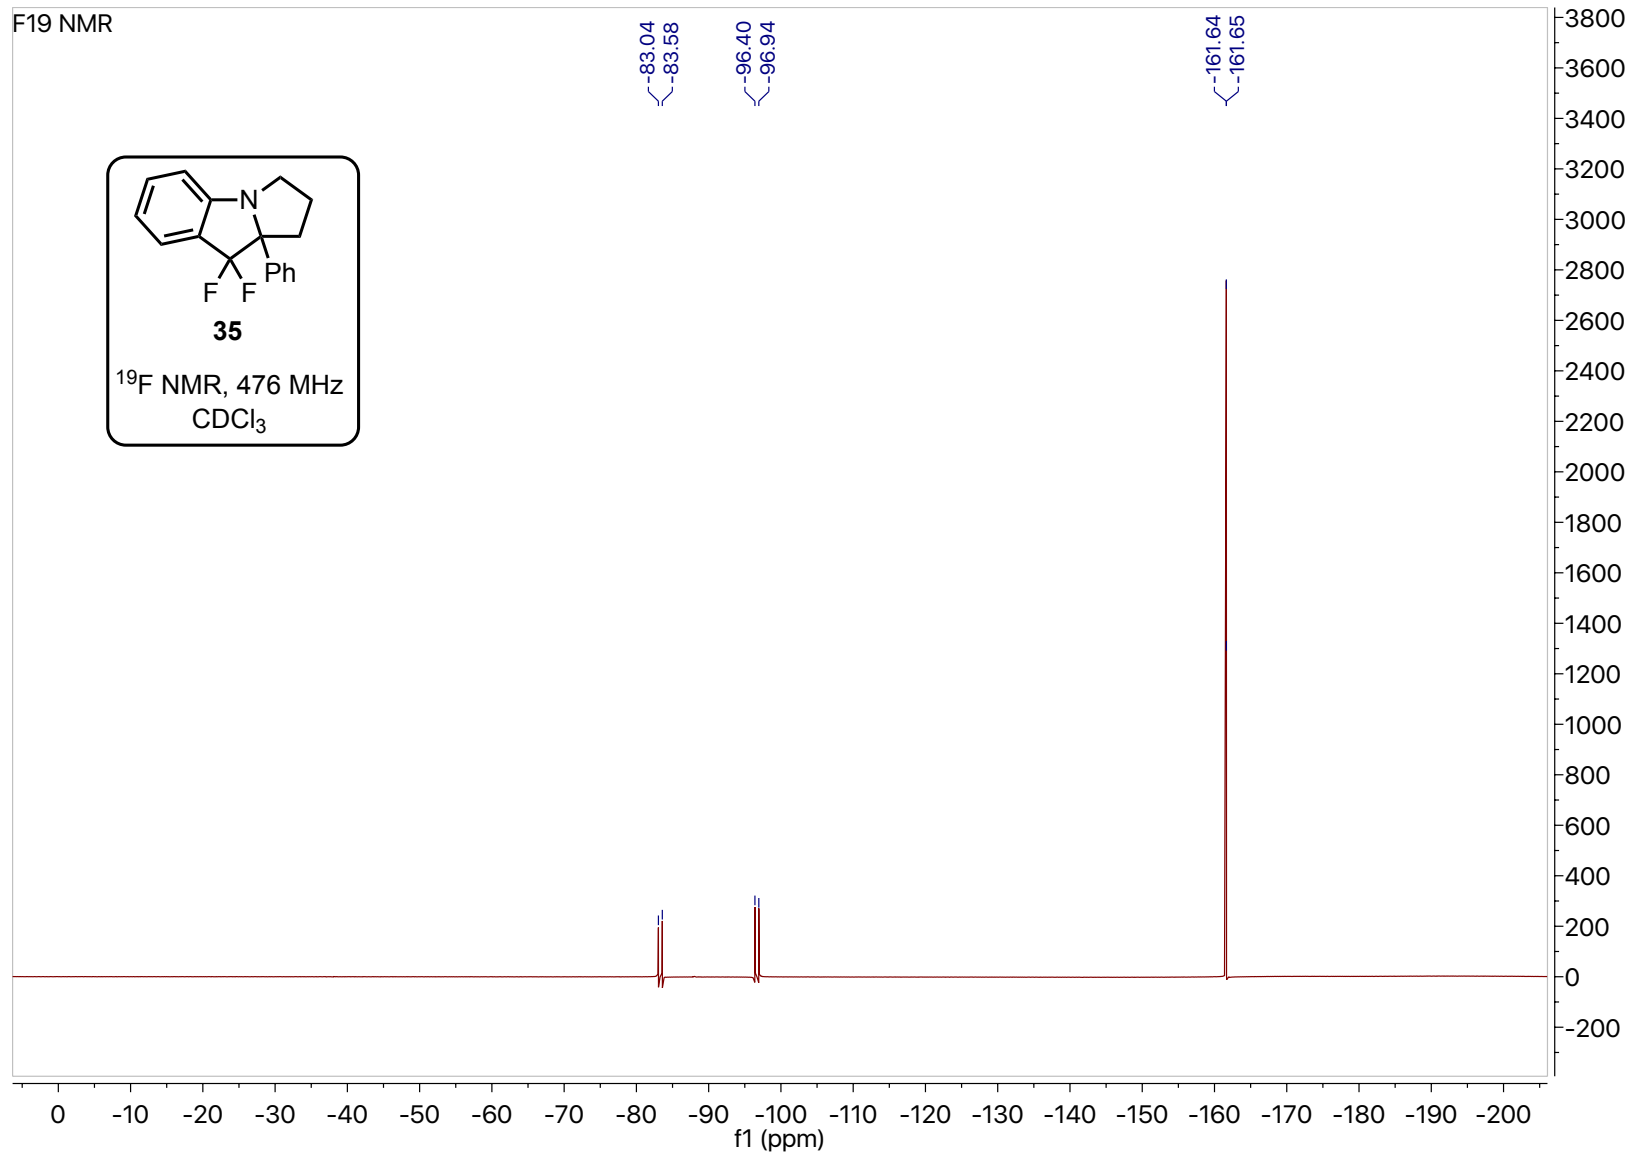

LP342F13-25  
1H NMR

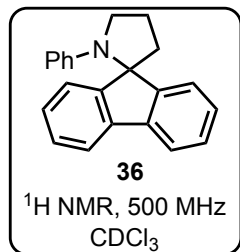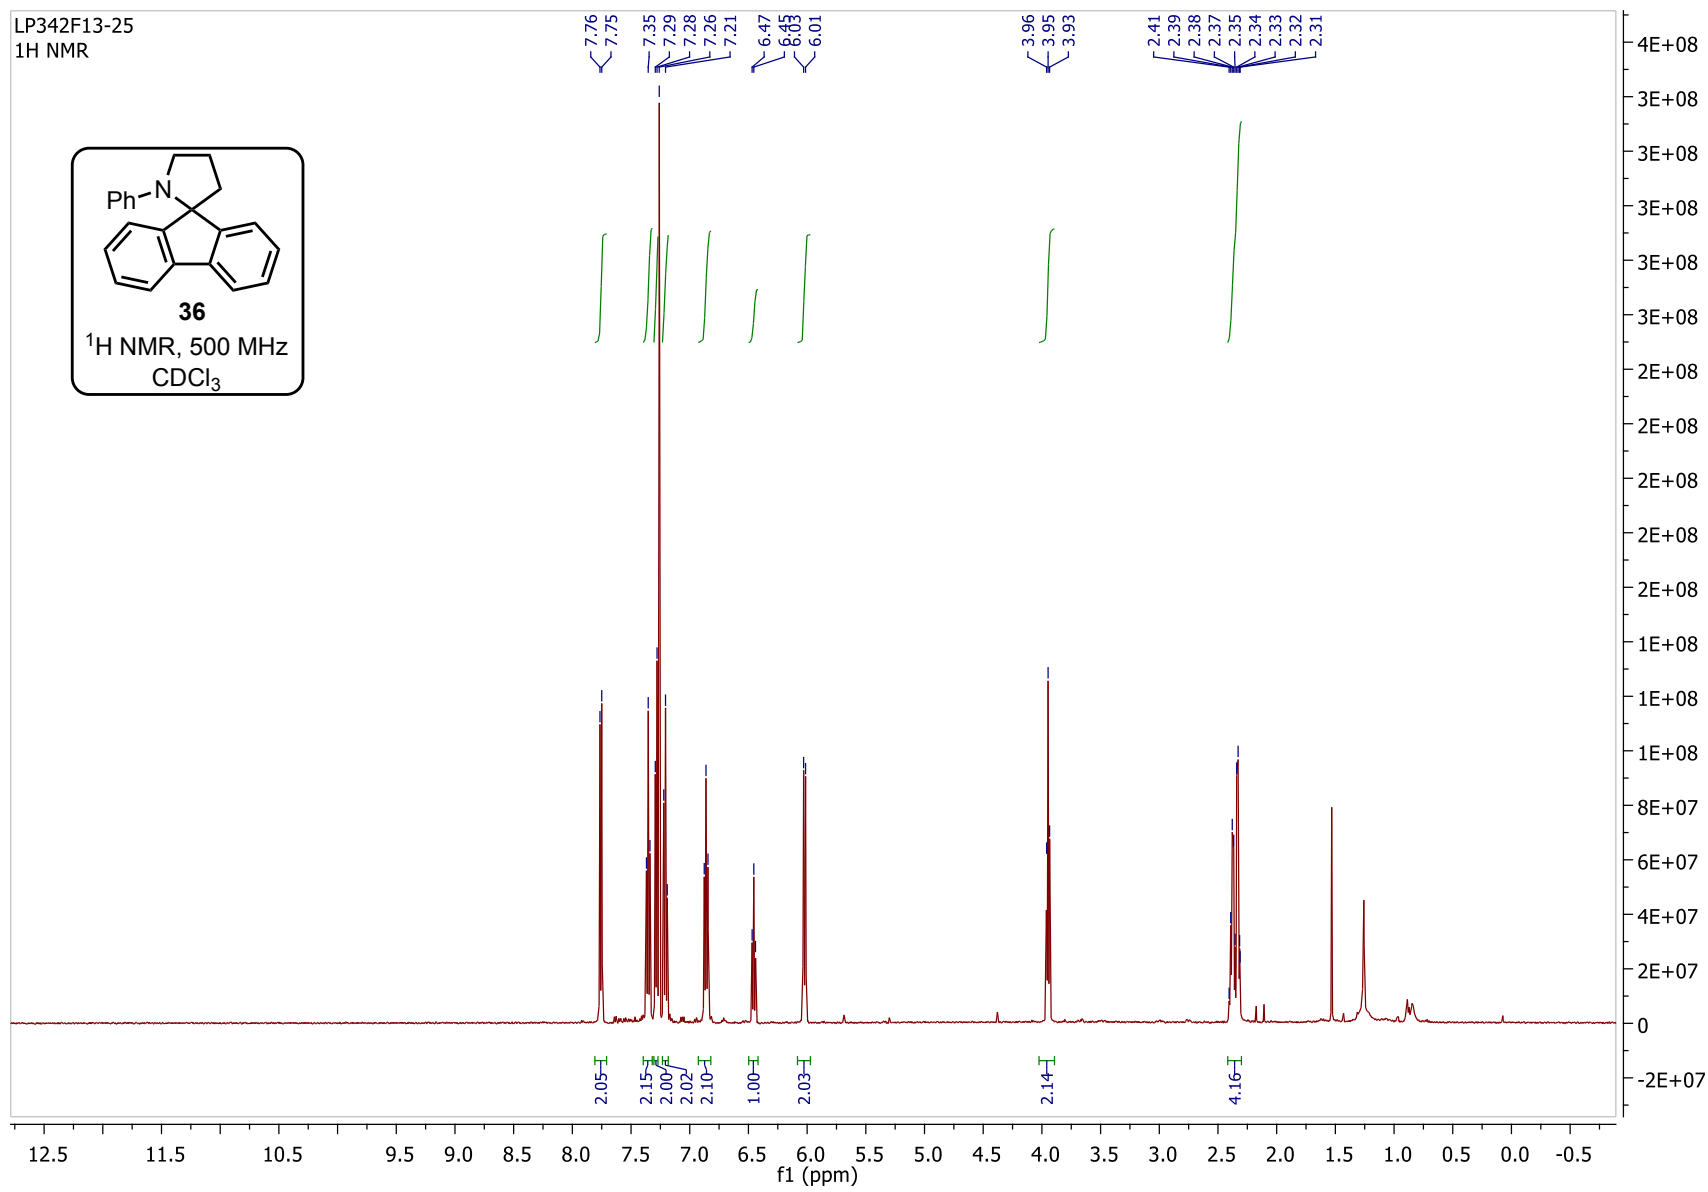

LP342F13-25  
13C NMR

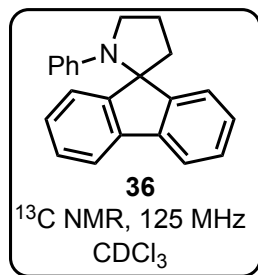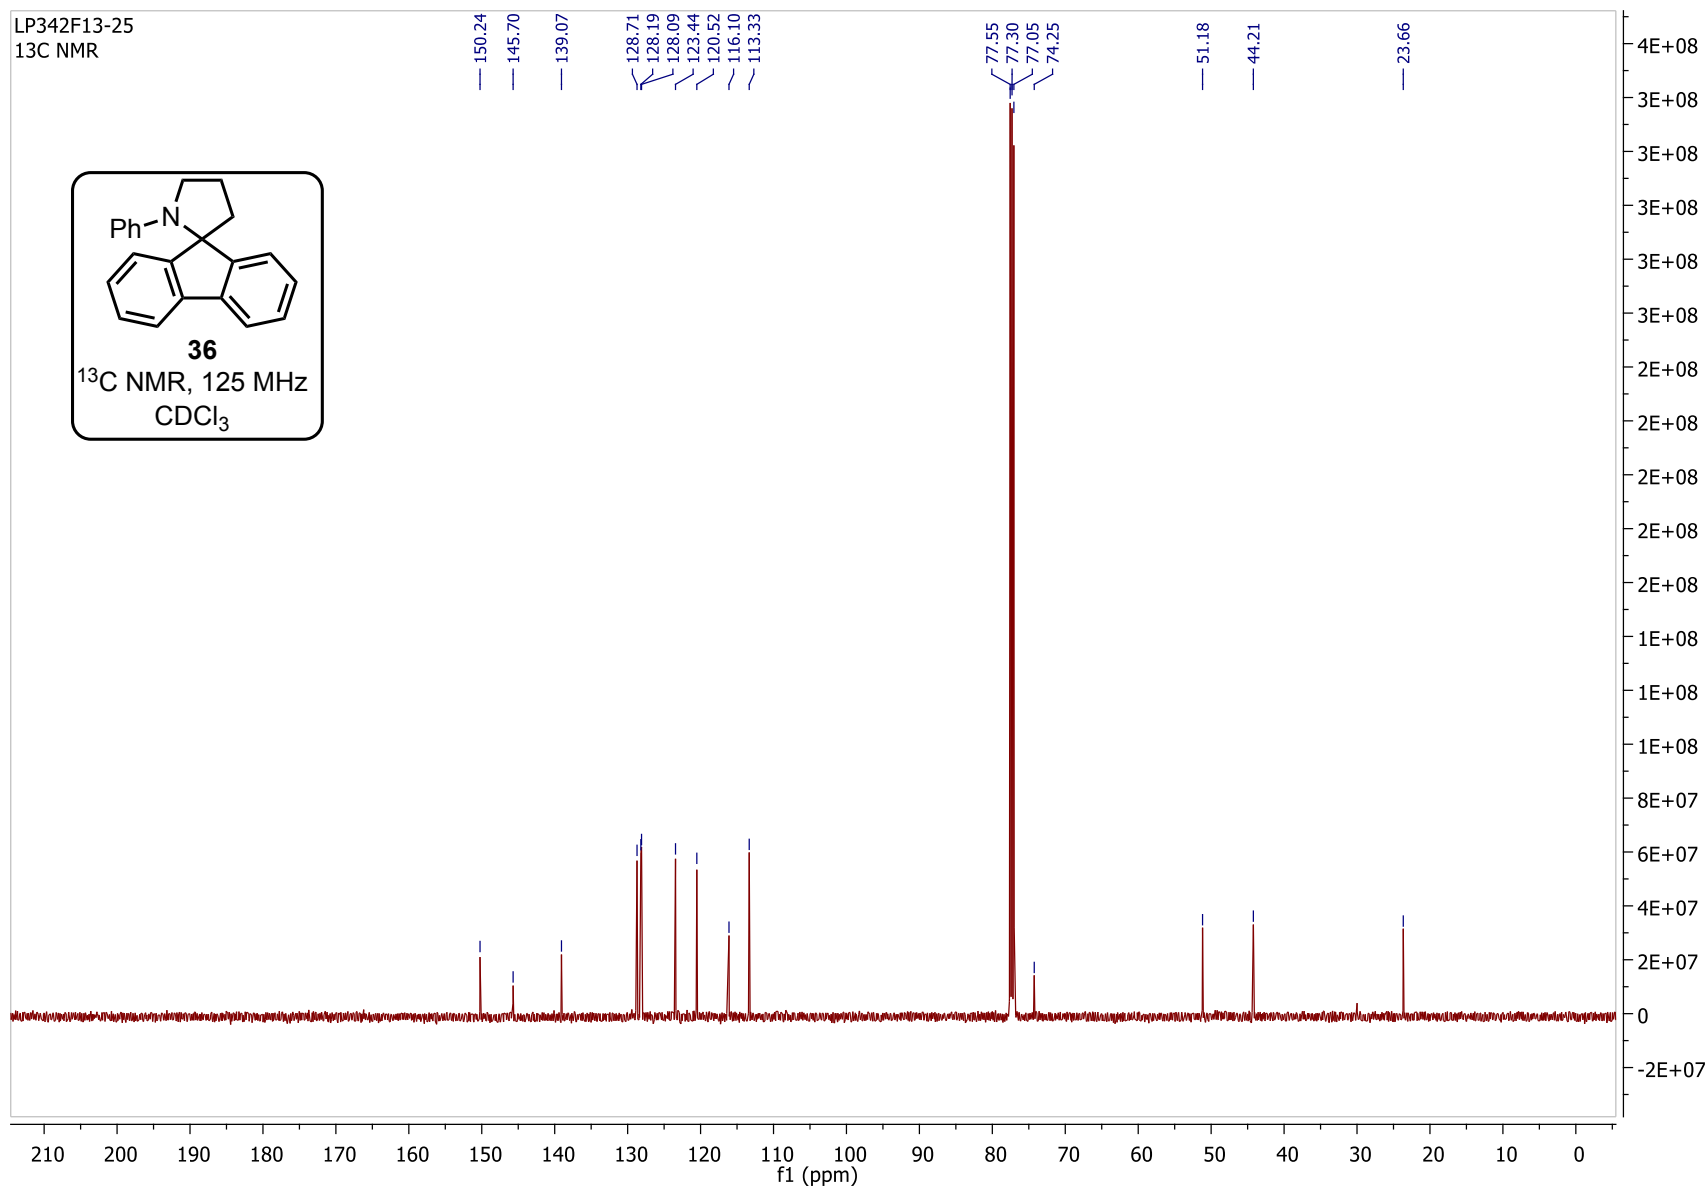

Supplement: NIHMS1017551-supplement-Supporting_Information.pdf [file NIHMS1017551-supplement-Supporting_Information.pdf]
